# Supplementary material for: Molecular insights into a distinct class of terpenoid cyclases
Source: Research Square preprint supplement (doi:10.21203/rs.3.rs-4382230/v1), 2024-12-23
Supplement: Supplementary file 1 [file 0c452b440f8da3f50101584d.xlsx]

## Sheet: Fig. 4a
		Percentage of WT
	BcABA3 enzyme	triplicate-1	triplicate-2	triplicate-3	Average
	WT	96.0624	101.627	102.311	100
	E124A	1.44911	1.326	1.07208	1.2824
	R202A	2.22005	3.29933	3.60672	3.04203
	Y242A	4.24374	5.59614	2.72812	4.18934
	K249A	0.924656	1.41543	2.86338	1.73449
	H250A	49.714	46.4065	46.8937	47.6714
	R312A	1.72969	2.61911	2.70403	2.35094
	Y313A	1.93365	2.57075	1.8422	2.11553
	Y96A	1.76921	4.08489	4.51523	3.45644
	Y96F	40.0063	43.4165	37.405	40.2759
	I117A	24.4516	21.4456	20.3031	22.0668
	I121A	11.3911	12.252	11.8528	11.832
	F167A	49.7542	48.4536	48.8022	49.0033
	L207A	28.2133	24.7855	22.1488	25.0492
	F302A	44.7722	43.155	42.5749	43.5007

## Sheet: Fig. 4b
WT		E124A		R202A		Y242A		K249A		H250A		R312A		Y313A		Y96A		Y96F		I117A		I121A		F167A		L207A		F302A
Ret.Time	Absolute Intensity	Ret.Time	Absolute Intensity	Ret.Time	Absolute Intensity	Ret.Time	Absolute Intensity	Ret.Time	Absolute Intensity	Ret.Time	Absolute Intensity	Ret.Time	Absolute Intensity	Ret.Time	Absolute Intensity	Ret.Time	Absolute Intensity	Ret.Time	Absolute Intensity	Ret.Time	Absolute Intensity	Ret.Time	Absolute Intensity	Ret.Time	Absolute Intensity	Ret.Time	Absolute Intensity	Ret.Time	Absolute Intensity
3.5	0	3.5	0	3.5	0	3.5	0	3.5	0	3.5	0	3.5	0	3.5	0	3.5	0	3.5	0	3.5	0	3.5	0	3.5	0	3.5	0	3.5	0
3.505	-560	3.505	-499	3.505	-515	3.505	-509	3.505	-516	3.505	-517	3.505	-484	3.505	-518	3.505	-558	3.505	-1000	3.505	-521	3.505	-726	3.505	-502	3.505	-523	3.505	-520
3.51	318	3.51	458	3.51	142	3.51	154	3.51	131	3.51	166	3.51	105	3.51	80	3.51	94	3.51	229	3.51	76	3.51	272	3.51	99	3.51	60	3.51	97
3.515	685	3.515	739	3.515	231	3.515	259	3.515	248	3.515	248	3.515	152	3.515	152	3.515	149	3.515	390	3.515	112	3.515	219	3.515	112	3.515	121	3.515	179
3.52	568	3.52	526	3.52	167	3.52	387	3.52	218	3.52	157	3.52	179	3.52	210	3.52	168	3.52	628	3.52	136	3.52	311	3.52	157	3.52	183	3.52	188
3.525	349	3.525	295	3.525	232	3.525	341	3.525	264	3.525	117	3.525	223	3.525	204	3.525	158	3.525	127	3.525	161	3.525	383	3.525	229	3.525	198	3.525	211
3.53	336	3.53	184	3.53	327	3.53	317	3.53	299	3.53	154	3.53	279	3.53	240	3.53	178	3.53	181	3.53	208	3.53	427	3.53	269	3.53	225	3.53	243
3.535	358	3.535	212	3.535	381	3.535	205	3.535	272	3.535	131	3.535	304	3.535	290	3.535	174	3.535	230	3.535	212	3.535	479	3.535	275	3.535	222	3.535	216
3.54	378	3.54	324	3.54	386	3.54	175	3.54	252	3.54	121	3.54	300	3.54	301	3.54	174	3.54	232	3.54	188	3.54	489	3.54	248	3.54	198	3.54	205
3.545	351	3.545	343	3.545	431	3.545	106	3.545	302	3.545	133	3.545	323	3.545	300	3.545	232	3.545	202	3.545	178	3.545	433	3.545	221	3.545	184	3.545	239
3.55	455	3.55	395	3.55	462	3.55	276	3.55	312	3.55	136	3.55	302	3.55	219	3.55	296	3.55	213	3.55	157	3.55	421	3.55	208	3.55	201	3.55	237
3.555	509	3.555	332	3.555	428	3.555	312	3.555	302	3.555	157	3.555	239	3.555	160	3.555	320	3.555	235	3.555	147	3.555	458	3.555	193	3.555	211	3.555	251
3.56	603	3.56	129	3.56	396	3.56	232	3.56	315	3.56	155	3.56	205	3.56	200	3.56	305	3.56	221	3.56	149	3.56	410	3.56	217	3.56	211	3.56	256
3.565	713	3.565	270	3.565	317	3.565	189	3.565	158	3.565	147	3.565	209	3.565	219	3.565	286	3.565	196	3.565	187	3.565	365	3.565	264	3.565	229	3.565	248
3.57	836	3.57	319	3.57	228	3.57	147	3.57	171	3.57	153	3.57	280	3.57	220	3.57	297	3.57	189	3.57	219	3.57	397	3.57	250	3.57	216	3.57	240
3.575	856	3.575	382	3.575	224	3.575	271	3.575	290	3.575	194	3.575	320	3.575	228	3.575	307	3.575	208	3.575	174	3.575	453	3.575	215	3.575	164	3.575	241
3.58	674	3.58	414	3.58	248	3.58	277	3.58	251	3.58	205	3.58	268	3.58	231	3.58	300	3.58	232	3.58	118	3.58	495	3.58	216	3.58	155	3.58	262
3.585	715	3.585	259	3.585	223	3.585	321	3.585	234	3.585	163	3.585	205	3.585	247	3.585	313	3.585	197	3.585	116	3.585	494	3.585	239	3.585	187	3.585	185
3.59	1767	3.59	251	3.59	230	3.59	305	3.59	213	3.59	136	3.59	210	3.59	238	3.59	332	3.59	170	3.59	149	3.59	497	3.59	279	3.59	193	3.59	138
3.595	1934	3.595	239	3.595	294	3.595	257	3.595	259	3.595	103	3.595	224	3.595	208	3.595	312	3.595	183	3.595	140	3.595	483	3.595	277	3.595	186	3.595	227
3.6	1836	3.6	223	3.6	362	3.6	301	3.6	296	3.6	81	3.6	206	3.6	226	3.6	285	3.6	173	3.6	152	3.6	434	3.6	253	3.6	210	3.6	257
3.605	834	3.605	414	3.605	187	3.605	319	3.605	258	3.605	119	3.605	184	3.605	290	3.605	303	3.605	181	3.605	210	3.605	382	3.605	243	3.605	270	3.605	224
3.61	853	3.61	464	3.61	345	3.61	232	3.61	233	3.61	155	3.61	238	3.61	315	3.61	349	3.61	187	3.61	219	3.61	360	3.61	261	3.61	229	3.61	192
3.615	870	3.615	221	3.615	196	3.615	112	3.615	147	3.615	168	3.615	249	3.615	241	3.615	406	3.615	224	3.615	181	3.615	347	3.615	226	3.615	153	3.615	160
3.62	907	3.62	331	3.62	202	3.62	163	3.62	232	3.62	151	3.62	212	3.62	206	3.62	456	3.62	300	3.62	166	3.62	335	3.62	169	3.62	172	3.62	204
3.625	1764	3.625	373	3.625	227	3.625	201	3.625	320	3.625	131	3.625	269	3.625	273	3.625	433	3.625	263	3.625	195	3.625	345	3.625	226	3.625	207	3.625	271
3.63	648	3.63	395	3.63	351	3.63	155	3.63	339	3.63	122	3.63	271	3.63	296	3.63	385	3.63	190	3.63	210	3.63	322	3.63	284	3.63	216	3.63	269
3.635	585	3.635	390	3.635	317	3.635	225	3.635	131	3.635	109	3.635	224	3.635	253	3.635	383	3.635	186	3.635	177	3.635	364	3.635	240	3.635	228	3.635	260
3.64	731	3.64	423	3.64	335	3.64	134	3.64	301	3.64	114	3.64	192	3.64	231	3.64	369	3.64	192	3.64	167	3.64	418	3.64	190	3.64	209	3.64	269
3.645	755	3.645	458	3.645	351	3.645	100	3.645	349	3.645	145	3.645	239	3.645	236	3.645	384	3.645	197	3.645	187	3.645	352	3.645	183	3.645	171	3.645	225
3.65	633	3.65	504	3.65	203	3.65	261	3.65	400	3.65	194	3.65	312	3.65	226	3.65	419	3.65	190	3.65	186	3.65	306	3.65	165	3.65	181	3.65	148
3.655	613	3.655	301	3.655	188	3.655	222	3.655	356	3.655	192	3.655	319	3.655	205	3.655	379	3.655	176	3.655	147	3.655	355	3.655	140	3.655	209	3.655	174
3.66	609	3.66	456	3.66	204	3.66	214	3.66	179	3.66	152	3.66	294	3.66	208	3.66	332	3.66	141	3.66	134	3.66	360	3.66	182	3.66	235	3.66	274
3.665	687	3.665	423	3.665	215	3.665	273	3.665	160	3.665	124	3.665	267	3.665	238	3.665	302	3.665	120	3.665	141	3.665	353	3.665	238	3.665	257	3.665	285
3.67	762	3.67	335	3.67	185	3.67	148	3.67	108	3.67	123	3.67	242	3.67	238	3.67	242	3.67	148	3.67	102	3.67	396	3.67	226	3.67	279	3.67	602
3.675	758	3.675	332	3.675	187	3.675	100	3.675	274	3.675	156	3.675	231	3.675	205	3.675	177	3.675	182	3.675	92	3.675	450	3.675	171	3.675	254	3.675	208
3.68	670	3.68	430	3.68	177	3.68	89	3.68	138	3.68	176	3.68	242	3.68	211	3.68	332	3.68	182	3.68	175	3.68	413	3.68	157	3.68	212	3.68	192
3.685	672	3.685	245	3.685	150	3.685	235	3.685	144	3.685	186	3.685	246	3.685	269	3.685	203	3.685	160	3.685	221	3.685	373	3.685	200	3.685	214	3.685	178
3.69	704	3.69	209	3.69	144	3.69	181	3.69	293	3.69	176	3.69	221	3.69	304	3.69	192	3.69	141	3.69	174	3.69	409	3.69	215	3.69	194	3.69	171
3.695	708	3.695	217	3.695	270	3.695	186	3.695	144	3.695	181	3.695	216	3.695	250	3.695	170	3.695	165	3.695	142	3.695	379	3.695	223	3.695	187	3.695	210
3.7	632	3.7	245	3.7	325	3.7	240	3.7	145	3.7	188	3.7	246	3.7	197	3.7	187	3.7	160	3.7	203	3.7	330	3.7	198	3.7	216	3.7	219
3.705	584	3.705	346	3.705	211	3.705	209	3.705	306	3.705	190	3.705	243	3.705	210	3.705	205	3.705	131	3.705	242	3.705	360	3.705	167	3.705	198	3.705	207
3.71	1283	3.71	377	3.71	173	3.71	152	3.71	133	3.71	173	3.71	181	3.71	240	3.71	208	3.71	163	3.71	203	3.71	369	3.71	206	3.71	170	3.71	237
3.715	507	3.715	364	3.715	140	3.715	181	3.715	52	3.715	139	3.715	172	3.715	248	3.715	197	3.715	218	3.715	179	3.715	320	3.715	208	3.715	181	3.715	213
3.72	391	3.72	360	3.72	194	3.72	167	3.72	229	3.72	150	3.72	248	3.72	230	3.72	172	3.72	237	3.72	171	3.72	335	3.72	186	3.72	212	3.72	186
3.725	443	3.725	347	3.725	223	3.725	198	3.725	291	3.725	136	3.725	289	3.725	220	3.725	180	3.725	221	3.725	136	3.725	430	3.725	224	3.725	272	3.725	261
3.73	573	3.73	326	3.73	176	3.73	121	3.73	270	3.73	123	3.73	276	3.73	214	3.73	178	3.73	219	3.73	122	3.73	489	3.73	256	3.73	264	3.73	279
3.735	544	3.735	326	3.735	149	3.735	262	3.735	259	3.735	203	3.735	259	3.735	249	3.735	122	3.735	253	3.735	149	3.735	499	3.735	249	3.735	198	3.735	211
3.74	464	3.74	336	3.74	165	3.74	330	3.74	260	3.74	251	3.74	240	3.74	285	3.74	116	3.74	254	3.74	190	3.74	466	3.74	253	3.74	203	3.74	210
3.745	437	3.745	199	3.745	175	3.745	276	3.745	235	3.745	227	3.745	190	3.745	259	3.745	163	3.745	269	3.745	189	3.745	609	3.745	274	3.745	198	3.745	246
3.75	344	3.75	165	3.75	301	3.75	158	3.75	133	3.75	182	3.75	148	3.75	217	3.75	215	3.75	230	3.75	158	3.75	381	3.75	254	3.75	158	3.75	274
3.755	328	3.755	145	3.755	168	3.755	179	3.755	144	3.755	173	3.755	174	3.755	208	3.755	231	3.755	176	3.755	168	3.755	444	3.755	240	3.755	189	3.755	275
3.76	499	3.76	168	3.76	137	3.76	178	3.76	178	3.76	166	3.76	258	3.76	233	3.76	185	3.76	158	3.76	227	3.76	426	3.76	245	3.76	230	3.76	245
3.765	553	3.765	166	3.765	144	3.765	188	3.765	208	3.765	154	3.765	308	3.765	232	3.765	184	3.765	222	3.765	224	3.765	442	3.765	227	3.765	181	3.765	212
3.77	550	3.77	136	3.77	181	3.77	219	3.77	187	3.77	174	3.77	267	3.77	167	3.77	343	3.77	285	3.77	174	3.77	521	3.77	218	3.77	142	3.77	215
3.775	1008	3.775	160	3.775	213	3.775	310	3.775	157	3.775	192	3.775	211	3.775	182	3.775	335	3.775	261	3.775	163	3.775	490	3.775	227	3.775	200	3.775	263
3.78	552	3.78	195	3.78	208	3.78	269	3.78	232	3.78	195	3.78	185	3.78	303	3.78	184	3.78	238	3.78	136	3.78	418	3.78	245	3.78	230	3.78	280
3.785	856	3.785	317	3.785	215	3.785	309	3.785	257	3.785	189	3.785	202	3.785	341	3.785	226	3.785	243	3.785	125	3.785	403	3.785	250	3.785	204	3.785	233
3.79	480	3.79	193	3.79	256	3.79	296	3.79	155	3.79	152	3.79	233	3.79	269	3.79	264	3.79	203	3.79	162	3.79	348	3.79	250	3.79	182	3.79	189
3.795	422	3.795	176	3.795	239	3.795	228	3.795	117	3.795	131	3.795	238	3.795	253	3.795	224	3.795	148	3.795	215	3.795	378	3.795	242	3.795	179	3.795	208
3.8	312	3.8	171	3.8	162	3.8	216	3.8	103	3.8	184	3.8	221	3.8	282	3.8	127	3.8	146	3.8	233	3.8	401	3.8	218	3.8	173	3.8	210
3.805	334	3.805	295	3.805	261	3.805	291	3.805	112	3.805	212	3.805	201	3.805	254	3.805	124	3.805	193	3.805	209	3.805	411	3.805	212	3.805	187	3.805	172
3.81	482	3.81	298	3.81	264	3.81	302	3.81	134	3.81	166	3.81	207	3.81	255	3.81	197	3.81	230	3.81	224	3.81	294	3.81	230	3.81	195	3.81	195
3.815	477	3.815	312	3.815	230	3.815	267	3.815	275	3.815	147	3.815	192	3.815	262	3.815	215	3.815	229	3.815	213	3.815	281	3.815	240	3.815	181	3.815	256
3.82	425	3.82	334	3.82	228	3.82	287	3.82	278	3.82	181	3.82	173	3.82	225	3.82	221	3.82	209	3.82	168	3.82	375	3.82	216	3.82	191	3.82	270
3.825	442	3.825	341	3.825	258	3.825	303	3.825	306	3.825	187	3.825	206	3.825	199	3.825	210	3.825	186	3.825	142	3.825	411	3.825	218	3.825	163	3.825	249
3.83	430	3.83	259	3.83	278	3.83	256	3.83	275	3.83	139	3.83	245	3.83	192	3.83	149	3.83	166	3.83	126	3.83	446	3.83	257	3.83	122	3.83	226
3.835	370	3.835	246	3.835	294	3.835	99	3.835	156	3.835	122	3.835	270	3.835	196	3.835	93	3.835	165	3.835	131	3.835	419	3.835	256	3.835	173	3.835	173
3.84	288	3.84	332	3.84	120	3.84	237	3.84	176	3.84	145	3.84	270	3.84	217	3.84	120	3.84	192	3.84	173	3.84	375	3.84	209	3.84	240	3.84	156
3.845	284	3.845	170	3.845	219	3.845	348	3.845	184	3.845	144	3.845	260	3.845	236	3.845	160	3.845	203	3.845	180	3.845	383	3.845	187	3.845	245	3.845	187
3.85	297	3.85	134	3.85	231	3.85	210	3.85	146	3.85	129	3.85	272	3.85	214	3.85	124	3.85	210	3.85	153	3.85	384	3.85	220	3.85	253	3.85	207
3.855	264	3.855	170	3.855	177	3.855	158	3.855	121	3.855	124	3.855	264	3.855	200	3.855	119	3.855	251	3.855	165	3.855	385	3.855	232	3.855	236	3.855	181
3.86	289	3.86	387	3.86	168	3.86	264	3.86	126	3.86	109	3.86	243	3.86	232	3.86	153	3.86	232	3.86	189	3.86	380	3.86	200	3.86	189	3.86	183
3.865	352	3.865	380	3.865	227	3.865	138	3.865	117	3.865	104	3.865	263	3.865	237	3.865	148	3.865	194	3.865	203	3.865	350	3.865	179	3.865	208	3.865	213
3.87	339	3.87	314	3.87	264	3.87	165	3.87	104	3.87	88	3.87	274	3.87	192	3.87	148	3.87	208	3.87	210	3.87	347	3.87	207	3.87	219	3.87	203
3.875	344	3.875	308	3.875	274	3.875	141	3.875	107	3.875	64	3.875	243	3.875	180	3.875	150	3.875	232	3.875	242	3.875	440	3.875	250	3.875	110	3.875	251
3.88	771	3.88	357	3.88	266	3.88	149	3.88	112	3.88	101	3.88	206	3.88	251	3.88	134	3.88	281	3.88	237	3.88	481	3.88	288	3.88	121	3.88	310
3.885	382	3.885	326	3.885	116	3.885	205	3.885	221	3.885	147	3.885	171	3.885	304	3.885	101	3.885	263	3.885	176	3.885	423	3.885	276	3.885	204	3.885	256
3.89	318	3.89	144	3.89	126	3.89	299	3.89	285	3.89	152	3.89	187	3.89	261	3.89	105	3.89	205	3.89	170	3.89	375	3.89	232	3.89	228	3.89	197
3.895	302	3.895	393	3.895	174	3.895	284	3.895	303	3.895	128	3.895	295	3.895	228	3.895	144	3.895	198	3.895	197	3.895	362	3.895	242	3.895	219	3.895	238
3.9	222	3.9	329	3.9	216	3.9	305	3.9	249	3.9	86	3.9	317	3.9	230	3.9	125	3.9	224	3.9	189	3.9	399	3.9	275	3.9	250	3.9	283
3.905	252	3.905	144	3.905	189	3.905	258	3.905	218	3.905	107	3.905	249	3.905	214	3.905	152	3.905	242	3.905	205	3.905	404	3.905	240	3.905	257	3.905	266
3.91	376	3.91	166	3.91	262	3.91	212	3.91	265	3.91	155	3.91	214	3.91	242	3.91	210	3.91	242	3.91	252	3.91	366	3.91	194	3.91	195	3.91	241
3.915	406	3.915	152	3.915	123	3.915	186	3.915	300	3.915	155	3.915	232	3.915	296	3.915	161	3.915	260	3.915	267	3.915	361	3.915	190	3.915	166	3.915	221
3.92	396	3.92	281	3.92	341	3.92	208	3.92	318	3.92	165	3.92	300	3.92	309	3.92	66	3.92	278	3.92	233	3.92	427	3.92	200	3.92	178	3.92	208
3.925	383	3.925	255	3.925	433	3.925	263	3.925	304	3.925	130	3.925	317	3.925	287	3.925	42	3.925	249	3.925	180	3.925	457	3.925	237	3.925	184	3.925	213
3.93	384	3.93	304	3.93	443	3.93	318	3.93	266	3.93	103	3.93	254	3.93	261	3.93	86	3.93	184	3.93	178	3.93	392	3.93	256	3.93	198	3.93	237
3.935	392	3.935	383	3.935	327	3.935	361	3.935	266	3.935	96	3.935	218	3.935	251	3.935	191	3.935	223	3.935	205	3.935	336	3.935	249	3.935	191	3.935	269
3.94	344	3.94	181	3.94	202	3.94	367	3.94	290	3.94	123	3.94	277	3.94	277	3.94	277	3.94	243	3.94	195	3.94	304	3.94	222	3.94	184	3.94	265
3.945	296	3.945	408	3.945	223	3.945	332	3.945	287	3.945	141	3.945	330	3.945	299	3.945	229	3.945	208	3.945	170	3.945	329	3.945	169	3.945	162	3.945	205
3.95	271	3.95	168	3.95	134	3.95	281	3.95	167	3.95	155	3.95	323	3.95	274	3.95	145	3.95	207	3.95	164	3.95	358	3.95	130	3.95	205	3.95	180
3.955	261	3.955	205	3.955	112	3.955	300	3.955	126	3.955	173	3.955	293	3.955	237	3.955	192	3.955	194	3.955	197	3.955	321	3.955	153	3.955	220	3.955	225
3.96	272	3.96	344	3.96	292	3.96	308	3.96	123	3.96	156	3.96	227	3.96	210	3.96	274	3.96	156	3.96	209	3.96	398	3.96	169	3.96	231	3.96	240
3.965	268	3.965	180	3.965	287	3.965	95	3.965	152	3.965	123	3.965	177	3.965	232	3.965	224	3.965	174	3.965	165	3.965	487	3.965	182	3.965	221	3.965	253
3.97	285	3.97	353	3.97	65	3.97	223	3.97	219	3.97	142	3.97	188	3.97	274	3.97	147	3.97	220	3.97	152	3.97	478	3.97	198	3.97	245	3.97	313
3.975	334	3.975	386	3.975	75	3.975	257	3.975	207	3.975	178	3.975	235	3.975	300	3.975	120	3.975	245	3.975	168	3.975	471	3.975	178	3.975	289	3.975	350
3.98	330	3.98	377	3.98	201	3.98	112	3.98	269	3.98	198	3.98	275	3.98	304	3.98	110	3.98	274	3.98	181	3.98	435	3.98	195	3.98	286	3.98	288
3.985	261	3.985	219	3.985	101	3.985	86	3.985	245	3.985	189	3.985	272	3.985	290	3.985	101	3.985	217	3.985	214	3.985	373	3.985	219	3.985	270	3.985	227
3.99	256	3.99	466	3.99	99	3.99	101	3.99	126	3.99	151	3.99	277	3.99	258	3.99	111	3.99	182	3.99	233	3.99	361	3.99	225	3.99	246	3.99	246
3.995	260	3.995	435	3.995	238	3.995	248	3.995	114	3.995	130	3.995	276	3.995	264	3.995	124	3.995	176	3.995	248	3.995	384	3.995	232	3.995	262	3.995	283
4	224	4	392	4	217	4	277	4	127	4	166	4	227	4	276	4	149	4	155	4	275	4	383	4	192	4	285	4	314
4.005	248	4.005	385	4.005	138	4.005	307	4.005	184	4.005	208	4.005	201	4.005	256	4.005	168	4.005	202	4.005	249	4.005	379	4.005	159	4.005	227	4.005	276
4.01	304	4.01	335	4.01	223	4.01	280	4.01	310	4.01	220	4.01	203	4.01	312	4.01	148	4.01	238	4.01	213	4.01	417	4.01	132	4.01	181	4.01	237
4.015	336	4.015	144	4.015	226	4.015	232	4.015	310	4.015	197	4.015	253	4.015	384	4.015	122	4.015	224	4.015	190	4.015	399	4.015	126	4.015	176	4.015	299
4.02	367	4.02	173	4.02	222	4.02	133	4.02	297	4.02	174	4.02	280	4.02	357	4.02	120	4.02	207	4.02	210	4.02	347	4.02	191	4.02	154	4.02	296
4.025	362	4.025	218	4.025	231	4.025	196	4.025	307	4.025	173	4.025	214	4.025	310	4.025	101	4.025	198	4.025	273	4.025	356	4.025	275	4.025	150	4.025	213
4.03	285	4.03	231	4.03	171	4.03	195	4.03	240	4.03	158	4.03	196	4.03	293	4.03	99	4.03	200	4.03	247	4.03	351	4.03	312	4.03	197	4.03	209
4.035	270	4.035	392	4.035	309	4.035	152	4.035	206	4.035	181	4.035	244	4.035	282	4.035	120	4.035	226	4.035	198	4.035	336	4.035	297	4.035	275	4.035	267
4.04	334	4.04	337	4.04	306	4.04	271	4.04	154	4.04	211	4.04	240	4.04	339	4.04	99	4.04	261	4.04	213	4.04	351	4.04	246	4.04	314	4.04	302
4.045	312	4.045	337	4.045	101	4.045	304	4.045	144	4.045	155	4.045	234	4.045	366	4.045	56	4.045	315	4.045	217	4.045	387	4.045	208	4.045	322	4.045	280
4.05	277	4.05	214	4.05	100	4.05	305	4.05	127	4.05	107	4.05	255	4.05	281	4.05	103	4.05	320	4.05	196	4.05	385	4.05	254	4.05	312	4.05	239
4.055	281	4.055	368	4.055	261	4.055	129	4.055	166	4.055	159	4.055	310	4.055	213	4.055	181	4.055	267	4.055	197	4.055	377	4.055	273	4.055	268	4.055	227
4.06	282	4.06	364	4.06	222	4.06	264	4.06	144	4.06	181	4.06	358	4.06	194	4.06	203	4.06	238	4.06	211	4.06	386	4.06	246	4.06	232	4.06	229
4.065	259	4.065	405	4.065	201	4.065	238	4.065	223	4.065	168	4.065	301	4.065	240	4.065	182	4.065	291	4.065	200	4.065	346	4.065	267	4.065	271	4.065	227
4.07	242	4.07	425	4.07	125	4.07	255	4.07	242	4.07	171	4.07	246	4.07	260	4.07	164	4.07	371	4.07	190	4.07	366	4.07	246	4.07	325	4.07	196
4.075	283	4.075	399	4.075	132	4.075	317	4.075	170	4.075	197	4.075	264	4.075	248	4.075	165	4.075	397	4.075	168	4.075	442	4.075	227	4.075	307	4.075	212
4.08	309	4.08	212	4.08	120	4.08	342	4.08	273	4.08	206	4.08	315	4.08	260	4.08	148	4.08	328	4.08	152	4.08	425	4.08	232	4.08	269	4.08	275
4.085	271	4.085	264	4.085	144	4.085	119	4.085	257	4.085	205	4.085	344	4.085	227	4.085	125	4.085	232	4.085	202	4.085	395	4.085	219	4.085	290	4.085	272
4.09	281	4.09	446	4.09	155	4.09	190	4.09	266	4.09	186	4.09	325	4.09	243	4.09	156	4.09	217	4.09	272	4.09	404	4.09	219	4.09	278	4.09	209
4.095	299	4.095	428	4.095	159	4.095	163	4.095	112	4.095	136	4.095	312	4.095	287	4.095	201	4.095	235	4.095	284	4.095	381	4.095	215	4.095	259	4.095	184
4.1	271	4.1	314	4.1	160	4.1	203	4.1	84	4.1	109	4.1	274	4.1	296	4.1	181	4.1	279	4.1	254	4.1	304	4.1	230	4.1	254	4.1	235
4.105	285	4.105	273	4.105	253	4.105	253	4.105	87	4.105	125	4.105	274	4.105	283	4.105	100	4.105	285	4.105	202	4.105	315	4.105	235	4.105	264	4.105	239
4.11	283	4.11	313	4.11	262	4.11	122	4.11	127	4.11	136	4.11	298	4.11	283	4.11	82	4.11	270	4.11	179	4.11	385	4.11	208	4.11	287	4.11	216
4.115	242	4.115	360	4.115	292	4.115	128	4.115	263	4.115	171	4.115	272	4.115	310	4.115	136	4.115	263	4.115	173	4.115	360	4.115	193	4.115	270	4.115	256
4.12	256	4.12	379	4.12	102	4.12	277	4.12	241	4.12	214	4.12	296	4.12	325	4.12	159	4.12	253	4.12	156	4.12	378	4.12	213	4.12	275	4.12	301
4.125	277	4.125	342	4.125	87	4.125	214	4.125	242	4.125	210	4.125	357	4.125	315	4.125	183	4.125	271	4.125	211	4.125	484	4.125	253	4.125	263	4.125	292
4.13	254	4.13	283	4.13	268	4.13	236	4.13	265	4.13	162	4.13	297	4.13	279	4.13	197	4.13	244	4.13	270	4.13	546	4.13	287	4.13	181	4.13	248
4.135	214	4.135	268	4.135	291	4.135	304	4.135	253	4.135	106	4.135	223	4.135	245	4.135	149	4.135	240	4.135	254	4.135	500	4.135	272	4.135	195	4.135	254
4.14	256	4.14	216	4.14	310	4.14	307	4.14	182	4.14	107	4.14	255	4.14	258	4.14	114	4.14	264	4.14	230	4.14	384	4.14	232	4.14	296	4.14	304
4.145	288	4.145	462	4.145	78	4.145	237	4.145	93	4.145	214	4.145	318	4.145	254	4.145	128	4.145	204	4.145	248	4.145	358	4.145	227	4.145	296	4.145	318
4.15	239	4.15	243	4.15	103	4.15	201	4.15	144	4.15	229	4.15	349	4.15	276	4.15	132	4.15	206	4.15	269	4.15	401	4.15	215	4.15	232	4.15	304
4.155	230	4.155	232	4.155	129	4.155	224	4.155	163	4.155	193	4.155	352	4.155	328	4.155	149	4.155	297	4.155	265	4.155	445	4.155	262	4.155	186	4.155	288
4.16	269	4.16	195	4.16	133	4.16	75	4.16	147	4.16	201	4.16	301	4.16	343	4.16	148	4.16	323	4.16	256	4.16	490	4.16	301	4.16	188	4.16	283
4.165	242	4.165	335	4.165	125	4.165	80	4.165	139	4.165	202	4.165	725	4.165	293	4.165	142	4.165	278	4.165	238	4.165	466	4.165	240	4.165	239	4.165	273
4.17	213	4.17	190	4.17	211	4.17	122	4.17	121	4.17	142	4.17	652	4.17	288	4.17	178	4.17	234	4.17	257	4.17	474	4.17	203	4.17	283	4.17	269
4.175	269	4.175	226	4.175	185	4.175	148	4.175	92	4.175	130	4.175	280	4.175	327	4.175	174	4.175	228	4.175	290	4.175	513	4.175	265	4.175	285	4.175	263
4.18	283	4.18	328	4.18	241	4.18	126	4.18	233	4.18	136	4.18	321	4.18	328	4.18	121	4.18	245	4.18	276	4.18	504	4.18	275	4.18	277	4.18	289
4.185	237	4.185	294	4.185	272	4.185	204	4.185	91	4.185	113	4.185	406	4.185	324	4.185	96	4.185	251	4.185	248	4.185	514	4.185	233	4.185	244	4.185	358
4.19	209	4.19	138	4.19	173	4.19	218	4.19	90	4.19	176	4.19	432	4.19	331	4.19	127	4.19	223	4.19	216	4.19	543	4.19	267	4.19	178	4.19	417
4.195	223	4.195	371	4.195	188	4.195	148	4.195	97	4.195	256	4.195	354	4.195	336	4.195	170	4.195	237	4.195	203	4.195	537	4.195	293	4.195	179	4.195	424
4.2	301	4.2	396	4.2	386	4.2	123	4.2	204	4.2	233	4.2	264	4.2	289	4.2	189	4.2	258	4.2	256	4.2	491	4.2	283	4.2	191	4.2	373
4.205	329	4.205	394	4.205	326	4.205	125	4.205	242	4.205	212	4.205	213	4.205	235	4.205	164	4.205	210	4.205	314	4.205	442	4.205	331	4.205	213	4.205	311
4.21	285	4.21	361	4.21	111	4.21	114	4.21	200	4.21	219	4.21	209	4.21	254	4.21	128	4.21	211	4.21	267	4.21	421	4.21	362	4.21	217	4.21	312
4.215	288	4.215	349	4.215	112	4.215	144	4.215	198	4.215	202	4.215	272	4.215	267	4.215	122	4.215	269	4.215	213	4.215	443	4.215	302	4.215	238	4.215	356
4.22	260	4.22	328	4.22	135	4.22	159	4.22	269	4.22	187	4.22	328	4.22	261	4.22	149	4.22	746	4.22	258	4.22	648	4.22	270	4.22	233	4.22	334
4.225	196	4.225	320	4.225	127	4.225	222	4.225	98	4.225	150	4.225	318	4.225	261	4.225	147	4.225	253	4.225	276	4.225	535	4.225	285	4.225	193	4.225	312
4.23	225	4.23	335	4.23	103	4.23	158	4.23	196	4.23	95	4.23	258	4.23	280	4.23	114	4.23	222	4.23	204	4.23	463	4.23	300	4.23	186	4.23	323
4.235	346	4.235	333	4.235	133	4.235	121	4.235	198	4.235	78	4.235	233	4.235	301	4.235	130	4.235	262	4.235	195	4.235	390	4.235	342	4.235	209	4.235	307
4.24	413	4.24	308	4.24	353	4.24	79	4.24	139	4.24	116	4.24	332	4.24	286	4.24	158	4.24	339	4.24	227	4.24	425	4.24	395	4.24	217	4.24	309
4.245	371	4.245	306	4.245	329	4.245	50	4.245	140	4.245	146	4.245	382	4.245	249	4.245	186	4.245	299	4.245	222	4.245	498	4.245	390	4.245	222	4.245	360
4.25	314	4.25	370	4.25	156	4.25	66	4.25	271	4.25	151	4.25	857	4.25	223	4.25	235	4.25	230	4.25	260	4.25	523	4.25	336	4.25	267	4.25	355
4.255	258	4.255	387	4.255	160	4.255	236	4.255	191	4.255	162	4.255	354	4.255	227	4.255	342	4.255	252	4.255	274	4.255	494	4.255	317	4.255	287	4.255	327
4.26	228	4.26	313	4.26	165	4.26	272	4.26	139	4.26	152	4.26	388	4.26	283	4.26	230	4.26	271	4.26	285	4.26	507	4.26	320	4.26	294	4.26	308
4.265	240	4.265	316	4.265	248	4.265	277	4.265	97	4.265	136	4.265	400	4.265	348	4.265	140	4.265	243	4.265	304	4.265	554	4.265	309	4.265	336	4.265	306
4.27	544	4.27	370	4.27	250	4.27	275	4.27	110	4.27	182	4.27	387	4.27	301	4.27	132	4.27	230	4.27	269	4.27	487	4.27	296	4.27	297	4.27	307
4.275	233	4.275	388	4.275	199	4.275	245	4.275	104	4.275	229	4.275	320	4.275	269	4.275	82	4.275	220	4.275	270	4.275	369	4.275	255	4.275	256	4.275	275
4.28	259	4.28	353	4.28	120	4.28	248	4.28	89	4.28	212	4.28	270	4.28	320	4.28	65	4.28	228	4.28	283	4.28	393	4.28	226	4.28	241	4.28	264
4.285	261	4.285	328	4.285	156	4.285	267	4.285	235	4.285	187	4.285	341	4.285	333	4.285	84	4.285	256	4.285	262	4.285	462	4.285	199	4.285	260	4.285	312
4.29	286	4.29	309	4.29	159	4.29	98	4.29	118	4.29	189	4.29	418	4.29	317	4.29	146	4.29	256	4.29	270	4.29	390	4.29	183	4.29	321	4.29	320
4.295	309	4.295	283	4.295	156	4.295	107	4.295	224	4.295	179	4.295	367	4.295	305	4.295	176	4.295	246	4.295	273	4.295	338	4.295	216	4.295	328	4.295	302
4.3	323	4.3	305	4.3	192	4.3	226	4.3	220	4.3	196	4.3	310	4.3	307	4.3	174	4.3	211	4.3	260	4.3	460	4.3	316	4.3	327	4.3	296
4.305	358	4.305	337	4.305	198	4.305	237	4.305	204	4.305	228	4.305	307	4.305	295	4.305	207	4.305	183	4.305	237	4.305	515	4.305	370	4.305	608	4.305	322
4.31	366	4.31	329	4.31	152	4.31	263	4.31	90	4.31	186	4.31	349	4.31	261	4.31	195	4.31	205	4.31	242	4.31	410	4.31	312	4.31	278	4.31	368
4.315	282	4.315	151	4.315	103	4.315	280	4.315	79	4.315	155	4.315	381	4.315	277	4.315	141	4.315	200	4.315	250	4.315	358	4.315	341	4.315	282	4.315	408
4.32	215	4.32	142	4.32	106	4.32	290	4.32	74	4.32	173	4.32	369	4.32	341	4.32	144	4.32	241	4.32	269	4.32	408	4.32	417	4.32	306	4.32	414
4.325	229	4.325	173	4.325	238	4.325	249	4.325	70	4.325	182	4.325	340	4.325	390	4.325	199	4.325	331	4.325	294	4.325	412	4.325	373	4.325	309	4.325	344
4.33	242	4.33	156	4.33	158	4.33	167	4.33	95	4.33	192	4.33	320	4.33	428	4.33	211	4.33	379	4.33	255	4.33	353	4.33	336	4.33	285	4.33	288
4.335	245	4.335	294	4.335	267	4.335	174	4.335	155	4.335	184	4.335	309	4.335	399	4.335	176	4.335	406	4.335	271	4.335	365	4.335	314	4.335	258	4.335	320
4.34	230	4.34	400	4.34	236	4.34	240	4.34	218	4.34	183	4.34	285	4.34	322	4.34	200	4.34	372	4.34	350	4.34	454	4.34	319	4.34	243	4.34	347
4.345	257	4.345	189	4.345	216	4.345	292	4.345	208	4.345	220	4.345	328	4.345	286	4.345	267	4.345	269	4.345	368	4.345	503	4.345	368	4.345	262	4.345	320
4.35	315	4.35	290	4.35	129	4.35	295	4.35	155	4.35	280	4.35	412	4.35	278	4.35	262	4.35	192	4.35	301	4.35	489	4.35	367	4.35	616	4.35	271
4.355	591	4.355	303	4.355	146	4.355	119	4.355	121	4.355	224	4.355	424	4.355	298	4.355	216	4.355	193	4.355	240	4.355	498	4.355	334	4.355	704	4.355	262
4.36	512	4.36	324	4.36	166	4.36	104	4.36	145	4.36	154	4.36	395	4.36	312	4.36	166	4.36	225	4.36	248	4.36	548	4.36	337	4.36	638	4.36	282
4.365	256	4.365	283	4.365	146	4.365	221	4.365	180	4.365	173	4.365	422	4.365	302	4.365	87	4.365	227	4.365	246	4.365	556	4.365	355	4.365	295	4.365	280
4.37	234	4.37	266	4.37	239	4.37	221	4.37	159	4.37	224	4.37	379	4.37	299	4.37	74	4.37	435	4.37	228	4.37	511	4.37	371	4.37	326	4.37	262
4.375	278	4.375	120	4.375	295	4.375	235	4.375	142	4.375	229	4.375	352	4.375	342	4.375	125	4.375	485	4.375	226	4.375	500	4.375	406	4.375	367	4.375	242
4.38	313	4.38	152	4.38	287	4.38	153	4.38	260	4.38	224	4.38	330	4.38	386	4.38	134	4.38	301	4.38	242	4.38	514	4.38	380	4.38	372	4.38	243
4.385	280	4.385	277	4.385	227	4.385	117	4.385	225	4.385	196	4.385	318	4.385	347	4.385	131	4.385	249	4.385	275	4.385	500	4.385	307	4.385	312	4.385	301
4.39	248	4.39	280	4.39	186	4.39	176	4.39	122	4.39	107	4.39	372	4.39	301	4.39	179	4.39	195	4.39	261	4.39	461	4.39	293	4.39	299	4.39	355
4.395	264	4.395	307	4.395	213	4.395	281	4.395	131	4.395	90	4.395	392	4.395	301	4.395	241	4.395	181	4.395	318	4.395	450	4.395	293	4.395	657	4.395	379
4.4	268	4.4	347	4.4	310	4.4	345	4.4	134	4.4	304	4.4	351	4.4	334	4.4	221	4.4	236	4.4	390	4.4	500	4.4	270	4.4	643	4.4	361
4.405	217	4.405	375	4.405	190	4.405	274	4.405	243	4.405	159	4.405	320	4.405	396	4.405	182	4.405	268	4.405	358	4.405	536	4.405	277	4.405	365	4.405	318
4.41	231	4.41	328	4.41	121	4.41	126	4.41	291	4.41	168	4.41	306	4.41	395	4.41	194	4.41	208	4.41	318	4.41	538	4.41	323	4.41	336	4.41	313
4.415	548	4.415	93	4.415	102	4.415	150	4.415	160	4.415	357	4.415	329	4.415	377	4.415	192	4.415	201	4.415	342	4.415	561	4.415	324	4.415	333	4.415	366
4.42	321	4.42	256	4.42	266	4.42	267	4.42	171	4.42	160	4.42	374	4.42	421	4.42	206	4.42	283	4.42	314	4.42	575	4.42	276	4.42	336	4.42	387
4.425	344	4.425	316	4.425	298	4.425	307	4.425	348	4.425	185	4.425	367	4.425	470	4.425	212	4.425	346	4.425	249	4.425	560	4.425	290	4.425	312	4.425	378
4.43	345	4.43	324	4.43	292	4.43	293	4.43	290	4.43	228	4.43	369	4.43	445	4.43	186	4.43	332	4.43	248	4.43	598	4.43	356	4.43	527	4.43	368
4.435	323	4.435	309	4.435	227	4.435	246	4.435	145	4.435	242	4.435	914	4.435	422	4.435	226	4.435	292	4.435	321	4.435	663	4.435	444	4.435	578	4.435	429
4.44	267	4.44	316	4.44	224	4.44	222	4.44	178	4.44	179	4.44	947	4.44	433	4.44	276	4.44	293	4.44	399	4.44	634	4.44	472	4.44	378	4.44	509
4.445	223	4.445	351	4.445	289	4.445	214	4.445	324	4.445	134	4.445	483	4.445	408	4.445	218	4.445	261	4.445	441	4.445	583	4.445	392	4.445	360	4.445	485
4.45	262	4.45	389	4.45	212	4.45	175	4.45	314	4.45	199	4.45	519	4.45	360	4.45	158	4.45	221	4.45	421	4.45	649	4.45	329	4.45	271	4.45	445
4.455	294	4.455	407	4.455	293	4.455	189	4.455	266	4.455	257	4.455	507	4.455	315	4.455	347	4.455	248	4.455	359	4.455	682	4.455	352	4.455	272	4.455	435
4.46	272	4.46	345	4.46	193	4.46	217	4.46	177	4.46	241	4.46	426	4.46	342	4.46	243	4.46	258	4.46	335	4.46	548	4.46	400	4.46	394	4.46	452
4.465	264	4.465	290	4.465	223	4.465	209	4.465	173	4.465	243	4.465	402	4.465	403	4.465	292	4.465	243	4.465	606	4.465	450	4.465	456	4.465	470	4.465	441
4.47	272	4.47	292	4.47	274	4.47	173	4.47	127	4.47	253	4.47	409	4.47	384	4.47	233	4.47	250	4.47	362	4.47	518	4.47	457	4.47	486	4.47	422
4.475	266	4.475	272	4.475	166	4.475	288	4.475	117	4.475	239	4.475	376	4.475	306	4.475	161	4.475	222	4.475	330	4.475	590	4.475	405	4.475	478	4.475	414
4.48	241	4.48	253	4.48	271	4.48	88	4.48	117	4.48	230	4.48	405	4.48	277	4.48	168	4.48	211	4.48	370	4.48	561	4.48	392	4.48	450	4.48	419
4.485	277	4.485	271	4.485	244	4.485	213	4.485	219	4.485	212	4.485	497	4.485	351	4.485	231	4.485	237	4.485	450	4.485	521	4.485	392	4.485	372	4.485	448
4.49	326	4.49	309	4.49	249	4.49	277	4.49	256	4.49	157	4.49	553	4.49	429	4.49	320	4.49	221	4.49	397	4.49	595	4.49	386	4.49	331	4.49	424
4.495	585	4.495	284	4.495	130	4.495	311	4.495	319	4.495	123	4.495	535	4.495	439	4.495	378	4.495	250	4.495	339	4.495	637	4.495	408	4.495	325	4.495	456
4.5	308	4.5	273	4.5	235	4.5	262	4.5	126	4.5	171	4.5	525	4.5	447	4.5	344	4.5	316	4.5	381	4.5	586	4.5	401	4.5	310	4.5	489
4.505	336	4.505	315	4.505	251	4.505	191	4.505	216	4.505	335	4.505	525	4.505	443	4.505	272	4.505	351	4.505	381	4.505	560	4.505	405	4.505	328	4.505	402
4.51	349	4.51	318	4.51	246	4.51	222	4.51	242	4.51	441	4.51	408	4.51	395	4.51	227	4.51	395	4.51	663	4.51	576	4.51	453	4.51	359	4.51	362
4.515	384	4.515	324	4.515	238	4.515	271	4.515	298	4.515	253	4.515	694	4.515	396	4.515	213	4.515	363	4.515	701	4.515	616	4.515	437	4.515	364	4.515	397
4.52	418	4.52	369	4.52	249	4.52	232	4.52	169	4.52	186	4.52	403	4.52	408	4.52	218	4.52	288	4.52	376	4.52	610	4.52	413	4.52	339	4.52	423
4.525	430	4.525	360	4.525	311	4.525	197	4.525	124	4.525	202	4.525	434	4.525	397	4.525	214	4.525	291	4.525	341	4.525	569	4.525	443	4.525	338	4.525	454
4.53	377	4.53	367	4.53	301	4.53	65	4.53	95	4.53	281	4.53	517	4.53	400	4.53	426	4.53	528	4.53	349	4.53	586	4.53	434	4.53	378	4.53	453
4.535	294	4.535	353	4.535	97	4.535	172	4.535	119	4.535	310	4.535	560	4.535	401	4.535	430	4.535	563	4.535	350	4.535	593	4.535	412	4.535	389	4.535	474
4.54	288	4.54	312	4.54	94	4.54	235	4.54	137	4.54	275	4.54	477	4.54	424	4.54	289	4.54	516	4.54	395	4.54	558	4.54	405	4.54	371	4.54	547
4.545	334	4.545	296	4.545	141	4.545	254	4.545	181	4.545	237	4.545	473	4.545	451	4.545	330	4.545	441	4.545	416	4.545	511	4.545	439	4.545	667	4.545	488
4.55	348	4.55	301	4.55	285	4.55	131	4.55	156	4.55	229	4.55	530	4.55	443	4.55	312	4.55	425	4.55	381	4.55	461	4.55	510	4.55	411	4.55	376
4.555	291	4.555	330	4.555	168	4.555	116	4.555	218	4.555	259	4.555	506	4.555	406	4.555	247	4.555	314	4.555	320	4.555	484	4.555	488	4.555	368	4.555	379
4.56	251	4.56	342	4.56	174	4.56	251	4.56	229	4.56	248	4.56	475	4.56	409	4.56	185	4.56	338	4.56	299	4.56	621	4.56	394	4.56	332	4.56	828
4.565	260	4.565	326	4.565	285	4.565	171	4.565	231	4.565	208	4.565	433	4.565	763	4.565	188	4.565	302	4.565	277	4.565	691	4.565	389	4.565	339	4.565	861
4.57	519	4.57	270	4.57	259	4.57	193	4.57	137	4.57	231	4.57	362	4.57	419	4.57	244	4.57	311	4.57	271	4.57	735	4.57	420	4.57	336	4.57	861
4.575	237	4.575	220	4.575	241	4.575	217	4.575	149	4.575	410	4.575	328	4.575	416	4.575	267	4.575	376	4.575	317	4.575	877	4.575	443	4.575	368	4.575	460
4.58	151	4.58	301	4.58	221	4.58	223	4.58	171	4.58	414	4.58	381	4.58	419	4.58	214	4.58	330	4.58	353	4.58	620	4.58	449	4.58	380	4.58	469
4.585	124	4.585	431	4.585	240	4.585	322	4.585	155	4.585	383	4.585	441	4.585	390	4.585	157	4.585	314	4.585	365	4.585	462	4.585	477	4.585	328	4.585	458
4.59	256	4.59	383	4.59	245	4.59	315	4.59	103	4.59	327	4.59	397	4.59	389	4.59	134	4.59	332	4.59	373	4.59	436	4.59	491	4.59	304	4.59	485
4.595	310	4.595	269	4.595	136	4.595	264	4.595	66	4.595	319	4.595	353	4.595	408	4.595	151	4.595	249	4.595	379	4.595	485	4.595	419	4.595	298	4.595	497
4.6	482	4.6	268	4.6	149	4.6	240	4.6	84	4.6	208	4.6	419	4.6	416	4.6	161	4.6	493	4.6	370	4.6	533	4.6	374	4.6	346	4.6	469
4.605	282	4.605	355	4.605	293	4.605	206	4.605	157	4.605	208	4.605	483	4.605	426	4.605	183	4.605	373	4.605	369	4.605	570	4.605	383	4.605	368	4.605	431
4.61	245	4.61	351	4.61	242	4.61	255	4.61	167	4.61	189	4.61	504	4.61	381	4.61	230	4.61	333	4.61	356	4.61	609	4.61	398	4.61	317	4.61	427
4.615	203	4.615	298	4.615	202	4.615	345	4.615	119	4.615	157	4.615	493	4.615	352	4.615	223	4.615	523	4.615	312	4.615	589	4.615	421	4.615	304	4.615	450
4.62	204	4.62	296	4.62	215	4.62	322	4.62	265	4.62	138	4.62	479	4.62	408	4.62	161	4.62	495	4.62	331	4.62	567	4.62	384	4.62	349	4.62	413
4.625	191	4.625	292	4.625	254	4.625	275	4.625	257	4.625	126	4.625	525	4.625	723	4.625	153	4.625	484	4.625	376	4.625	533	4.625	661	4.625	366	4.625	393
4.63	176	4.63	307	4.63	294	4.63	286	4.63	259	4.63	148	4.63	496	4.63	361	4.63	175	4.63	534	4.63	349	4.63	500	4.63	384	4.63	311	4.63	416
4.635	171	4.635	355	4.635	291	4.635	274	4.635	258	4.635	184	4.635	411	4.635	306	4.635	209	4.635	358	4.635	343	4.635	558	4.635	341	4.635	251	4.635	419
4.64	197	4.64	376	4.64	294	4.64	216	4.64	190	4.64	228	4.64	421	4.64	311	4.64	277	4.64	376	4.64	371	4.64	593	4.64	268	4.64	269	4.64	437
4.645	254	4.645	369	4.645	280	4.645	190	4.645	193	4.645	264	4.645	434	4.645	327	4.645	269	4.645	368	4.645	336	4.645	601	4.645	286	4.645	284	4.645	460
4.65	271	4.65	372	4.65	191	4.65	204	4.65	233	4.65	284	4.65	411	4.65	361	4.65	229	4.65	654	4.65	296	4.65	612	4.65	360	4.65	267	4.65	434
4.655	236	4.655	336	4.655	179	4.655	145	4.655	152	4.655	280	4.655	410	4.655	389	4.655	228	4.655	561	4.655	290	4.655	584	4.655	434	4.655	270	4.655	372
4.66	232	4.66	289	4.66	255	4.66	116	4.66	237	4.66	240	4.66	373	4.66	382	4.66	203	4.66	317	4.66	291	4.66	536	4.66	480	4.66	306	4.66	347
4.665	282	4.665	281	4.665	262	4.665	106	4.665	234	4.665	188	4.665	374	4.665	402	4.665	206	4.665	253	4.665	282	4.665	547	4.665	416	4.665	324	4.665	336
4.67	358	4.67	312	4.67	288	4.67	102	4.67	129	4.67	139	4.67	421	4.67	407	4.67	234	4.67	452	4.67	292	4.67	559	4.67	330	4.67	309	4.67	676
4.675	408	4.675	331	4.675	335	4.675	128	4.675	119	4.675	149	4.675	443	4.675	392	4.675	258	4.675	478	4.675	316	4.675	520	4.675	306	4.675	304	4.675	352
4.68	352	4.68	300	4.68	297	4.68	167	4.68	201	4.68	216	4.68	461	4.68	376	4.68	285	4.68	493	4.68	301	4.68	492	4.68	318	4.68	294	4.68	392
4.685	309	4.685	289	4.685	229	4.685	214	4.685	193	4.685	265	4.685	444	4.685	371	4.685	252	4.685	496	4.685	250	4.685	499	4.685	331	4.685	295	4.685	406
4.69	517	4.69	288	4.69	139	4.69	213	4.69	198	4.69	232	4.69	405	4.69	371	4.69	198	4.69	555	4.69	263	4.69	530	4.69	397	4.69	338	4.69	401
4.695	227	4.695	251	4.695	181	4.695	216	4.695	204	4.695	226	4.695	416	4.695	322	4.695	175	4.695	572	4.695	351	4.695	567	4.695	423	4.695	328	4.695	749
4.7	155	4.7	236	4.7	167	4.7	222	4.7	113	4.7	275	4.7	488	4.7	280	4.7	186	4.7	440	4.7	356	4.7	574	4.7	335	4.7	284	4.7	734
4.705	214	4.705	248	4.705	128	4.705	265	4.705	129	4.705	254	4.705	453	4.705	684	4.705	212	4.705	414	4.705	267	4.705	532	4.705	280	4.705	308	4.705	695
4.71	282	4.71	237	4.71	152	4.71	132	4.71	287	4.71	208	4.71	336	4.71	646	4.71	191	4.71	342	4.71	499	4.71	494	4.71	298	4.71	318	4.71	365
4.715	306	4.715	226	4.715	261	4.715	284	4.715	289	4.715	216	4.715	320	4.715	368	4.715	131	4.715	282	4.715	237	4.715	562	4.715	313	4.715	262	4.715	386
4.72	291	4.72	240	4.72	301	4.72	309	4.72	239	4.72	206	4.72	374	4.72	368	4.72	146	4.72	265	4.72	246	4.72	638	4.72	578	4.72	285	4.72	337
4.725	267	4.725	269	4.725	280	4.725	248	4.725	209	4.725	207	4.725	447	4.725	360	4.725	229	4.725	516	4.725	250	4.725	602	4.725	624	4.725	349	4.725	296
4.73	313	4.73	287	4.73	206	4.73	130	4.73	230	4.73	232	4.73	481	4.73	317	4.73	268	4.73	559	4.73	235	4.73	553	4.73	684	4.73	346	4.73	340
4.735	381	4.735	296	4.735	176	4.735	245	4.735	170	4.735	227	4.735	455	4.735	305	4.735	246	4.735	576	4.735	274	4.735	530	4.735	395	4.735	363	4.735	360
4.74	336	4.74	298	4.74	247	4.74	134	4.74	196	4.74	224	4.74	437	4.74	339	4.74	240	4.74	611	4.74	371	4.74	530	4.74	398	4.74	359	4.74	346
4.745	282	4.745	283	4.745	320	4.745	224	4.745	240	4.745	250	4.745	444	4.745	342	4.745	251	4.745	666	4.745	366	4.745	588	4.745	677	4.745	320	4.745	374
4.75	251	4.75	289	4.75	331	4.75	236	4.75	247	4.75	216	4.75	428	4.75	302	4.75	230	4.75	693	4.75	322	4.75	618	4.75	330	4.75	378	4.75	765
4.755	252	4.755	299	4.755	307	4.755	244	4.755	294	4.755	185	4.755	395	4.755	323	4.755	238	4.755	659	4.755	292	4.755	623	4.755	384	4.755	380	4.755	460
4.76	339	4.76	296	4.76	118	4.76	279	4.76	297	4.76	231	4.76	382	4.76	385	4.76	264	4.76	429	4.76	236	4.76	647	4.76	409	4.76	293	4.76	460
4.765	358	4.765	369	4.765	71	4.765	318	4.765	271	4.765	264	4.765	402	4.765	392	4.765	267	4.765	405	4.765	233	4.765	612	4.765	330	4.765	265	4.765	412
4.77	306	4.77	401	4.77	96	4.77	265	4.77	186	4.77	250	4.77	438	4.77	359	4.77	231	4.77	564	4.77	287	4.77	507	4.77	277	4.77	264	4.77	350
4.775	292	4.775	324	4.775	149	4.775	212	4.775	203	4.775	214	4.775	449	4.775	333	4.775	204	4.775	328	4.775	328	4.775	419	4.775	403	4.775	275	4.775	348
4.78	359	4.78	329	4.78	364	4.78	251	4.78	179	4.78	196	4.78	445	4.78	378	4.78	197	4.78	363	4.78	394	4.78	405	4.78	507	4.78	336	4.78	364
4.785	452	4.785	305	4.785	306	4.785	265	4.785	252	4.785	211	4.785	418	4.785	396	4.785	195	4.785	421	4.785	400	4.785	458	4.785	426	4.785	363	4.785	395
4.79	423	4.79	269	4.79	176	4.79	210	4.79	234	4.79	170	4.79	401	4.79	361	4.79	242	4.79	629	4.79	339	4.79	463	4.79	341	4.79	321	4.79	482
4.795	328	4.795	310	4.795	244	4.795	109	4.795	299	4.795	119	4.795	424	4.795	355	4.795	281	4.795	431	4.795	291	4.795	482	4.795	350	4.795	281	4.795	499
4.8	282	4.8	319	4.8	269	4.8	194	4.8	363	4.8	148	4.8	806	4.8	360	4.8	208	4.8	542	4.8	277	4.8	527	4.8	421	4.8	266	4.8	490
4.805	231	4.805	322	4.805	268	4.805	269	4.805	380	4.805	206	4.805	763	4.805	361	4.805	177	4.805	496	4.805	294	4.805	566	4.805	425	4.805	275	4.805	525
4.81	229	4.81	316	4.81	213	4.81	288	4.81	355	4.81	237	4.81	424	4.81	360	4.81	238	4.81	310	4.81	294	4.81	570	4.81	408	4.81	320	4.81	495
4.815	235	4.815	293	4.815	164	4.815	279	4.815	297	4.815	278	4.815	416	4.815	380	4.815	269	4.815	392	4.815	275	4.815	520	4.815	414	4.815	347	4.815	464
4.82	225	4.82	282	4.82	189	4.82	275	4.82	262	4.82	290	4.82	386	4.82	384	4.82	253	4.82	413	4.82	264	4.82	563	4.82	395	4.82	334	4.82	465
4.825	279	4.825	229	4.825	266	4.825	226	4.825	281	4.825	386	4.825	398	4.825	386	4.825	235	4.825	382	4.825	291	4.825	634	4.825	359	4.825	327	4.825	366
4.83	312	4.83	253	4.83	271	4.83	200	4.83	292	4.83	320	4.83	404	4.83	413	4.83	234	4.83	331	4.83	296	4.83	563	4.83	286	4.83	309	4.83	305
4.835	296	4.835	308	4.835	220	4.835	270	4.835	250	4.835	165	4.835	386	4.835	356	4.835	235	4.835	265	4.835	295	4.835	524	4.835	325	4.835	301	4.835	378
4.84	517	4.84	344	4.84	116	4.84	161	4.84	239	4.84	146	4.84	379	4.84	318	4.84	207	4.84	461	4.84	291	4.84	582	4.84	365	4.84	326	4.84	708
4.845	326	4.845	398	4.845	350	4.845	134	4.845	271	4.845	165	4.845	421	4.845	395	4.845	196	4.845	520	4.845	291	4.845	557	4.845	310	4.845	329	4.845	426
4.85	468	4.85	442	4.85	334	4.85	325	4.85	266	4.85	218	4.85	437	4.85	435	4.85	211	4.85	469	4.85	317	4.85	448	4.85	283	4.85	298	4.85	390
4.855	420	4.855	442	4.855	308	4.855	311	4.855	243	4.855	387	4.855	406	4.855	398	4.855	205	4.855	372	4.855	326	4.855	445	4.855	365	4.855	303	4.855	409
4.86	396	4.86	394	4.86	281	4.86	286	4.86	261	4.86	219	4.86	376	4.86	373	4.86	214	4.86	405	4.86	306	4.86	537	4.86	387	4.86	308	4.86	473
4.865	493	4.865	354	4.865	309	4.865	278	4.865	250	4.865	192	4.865	417	4.865	360	4.865	252	4.865	379	4.865	296	4.865	601	4.865	361	4.865	291	4.865	464
4.87	353	4.87	374	4.87	196	4.87	285	4.87	141	4.87	191	4.87	790	4.87	360	4.87	250	4.87	543	4.87	326	4.87	684	4.87	357	4.87	303	4.87	407
4.875	282	4.875	319	4.875	291	4.875	320	4.875	210	4.875	163	4.875	445	4.875	360	4.875	219	4.875	554	4.875	357	4.875	690	4.875	325	4.875	329	4.875	382
4.88	203	4.88	275	4.88	261	4.88	335	4.88	261	4.88	174	4.88	416	4.88	371	4.88	208	4.88	494	4.88	336	4.88	582	4.88	275	4.88	380	4.88	389
4.885	207	4.885	315	4.885	282	4.885	298	4.885	146	4.885	210	4.885	392	4.885	388	4.885	179	4.885	453	4.885	329	4.885	521	4.885	309	4.885	377	4.885	349
4.89	239	4.89	278	4.89	239	4.89	254	4.89	181	4.89	214	4.89	384	4.89	351	4.89	185	4.89	325	4.89	333	4.89	508	4.89	352	4.89	311	4.89	272
4.895	201	4.895	261	4.895	192	4.895	211	4.895	327	4.895	200	4.895	410	4.895	354	4.895	189	4.895	302	4.895	360	4.895	499	4.895	320	4.895	295	4.895	545
4.9	195	4.9	339	4.9	225	4.9	199	4.9	292	4.9	187	4.9	380	4.9	384	4.9	156	4.9	230	4.9	430	4.9	558	4.9	301	4.9	313	4.9	327
4.905	261	4.905	356	4.905	253	4.905	243	4.905	231	4.905	192	4.905	366	4.905	611	4.905	142	4.905	187	4.905	426	4.905	546	4.905	309	4.905	300	4.905	322
4.91	337	4.91	330	4.91	223	4.91	287	4.91	220	4.91	216	4.91	413	4.91	317	4.91	175	4.91	207	4.91	370	4.91	420	4.91	308	4.91	263	4.91	333
4.915	586	4.915	332	4.915	219	4.915	278	4.915	191	4.915	247	4.915	445	4.915	312	4.915	200	4.915	222	4.915	350	4.915	444	4.915	348	4.915	253	4.915	404
4.92	543	4.92	354	4.92	270	4.92	260	4.92	152	4.92	248	4.92	456	4.92	256	4.92	205	4.92	245	4.92	382	4.92	541	4.92	398	4.92	320	4.92	380
4.925	416	4.925	353	4.925	350	4.925	253	4.925	99	4.925	328	4.925	747	4.925	269	4.925	239	4.925	283	4.925	371	4.925	504	4.925	355	4.925	358	4.925	302
4.93	369	4.93	365	4.93	359	4.93	245	4.93	162	4.93	221	4.93	395	4.93	336	4.93	251	4.93	374	4.93	334	4.93	480	4.93	288	4.93	308	4.93	305
4.935	250	4.935	375	4.935	288	4.935	256	4.935	185	4.935	211	4.935	375	4.935	365	4.935	213	4.935	455	4.935	343	4.935	508	4.935	278	4.935	290	4.935	349
4.94	234	4.94	349	4.94	227	4.94	258	4.94	221	4.94	174	4.94	389	4.94	340	4.94	172	4.94	368	4.94	312	4.94	491	4.94	342	4.94	314	4.94	330
4.945	211	4.945	344	4.945	206	4.945	171	4.945	243	4.945	160	4.945	376	4.945	283	4.945	135	4.945	214	4.945	298	4.945	476	4.945	375	4.945	301	4.945	284
4.95	242	4.95	369	4.95	238	4.95	110	4.95	276	4.95	152	4.95	372	4.95	251	4.95	176	4.95	168	4.95	300	4.95	506	4.95	349	4.95	319	4.95	290
4.955	253	4.955	343	4.955	280	4.955	181	4.955	312	4.955	114	4.955	383	4.955	280	4.955	264	4.955	219	4.955	300	4.955	529	4.955	333	4.955	328	4.955	329
4.96	226	4.96	333	4.96	255	4.96	277	4.96	314	4.96	254	4.96	317	4.96	337	4.96	238	4.96	284	4.96	329	4.96	537	4.96	353	4.96	507	4.96	316
4.965	424	4.965	384	4.965	257	4.965	287	4.965	284	4.965	305	4.965	264	4.965	377	4.965	159	4.965	289	4.965	320	4.965	536	4.965	323	4.965	332	4.965	333
4.97	479	4.97	370	4.97	335	4.97	244	4.97	209	4.97	208	4.97	288	4.97	350	4.97	150	4.97	479	4.97	236	4.97	524	4.97	294	4.97	322	4.97	384
4.975	328	4.975	256	4.975	353	4.975	237	4.975	198	4.975	147	4.975	292	4.975	287	4.975	184	4.975	532	4.975	186	4.975	579	4.975	337	4.975	298	4.975	373
4.98	304	4.98	251	4.98	286	4.98	238	4.98	260	4.98	118	4.98	314	4.98	276	4.98	222	4.98	334	4.98	209	4.98	594	4.98	361	4.98	301	4.98	429
4.985	245	4.985	324	4.985	151	4.985	202	4.985	299	4.985	160	4.985	370	4.985	319	4.985	236	4.985	240	4.985	298	4.985	516	4.985	311	4.985	326	4.985	455
4.99	264	4.99	387	4.99	150	4.99	170	4.99	324	4.99	177	4.99	365	4.99	347	4.99	232	4.99	274	4.99	372	4.99	534	4.99	266	4.99	324	4.99	323
4.995	314	4.995	402	4.995	227	4.995	167	4.995	347	4.995	175	4.995	379	4.995	334	4.995	242	4.995	363	4.995	313	4.995	637	4.995	313	4.995	270	4.995	259
5	285	5	337	5	227	5	224	5	306	5	165	5	423	5	325	5	264	5	513	5	233	5	649	5	365	5	248	5	299
5.005	483	5.005	348	5.005	292	5.005	305	5.005	265	5.005	157	5.005	397	5.005	327	5.005	244	5.005	443	5.005	219	5.005	580	5.005	352	5.005	254	5.005	319
5.01	240	5.01	420	5.01	203	5.01	318	5.01	239	5.01	185	5.01	399	5.01	306	5.01	220	5.01	438	5.01	225	5.01	577	5.01	334	5.01	213	5.01	332
5.015	205	5.015	402	5.015	404	5.015	258	5.015	234	5.015	216	5.015	416	5.015	345	5.015	254	5.015	174	5.015	257	5.015	615	5.015	356	5.015	220	5.015	347
5.02	194	5.02	302	5.02	367	5.02	189	5.02	266	5.02	208	5.02	366	5.02	408	5.02	293	5.02	213	5.02	292	5.02	545	5.02	388	5.02	515	5.02	370
5.025	220	5.025	245	5.025	337	5.025	95	5.025	242	5.025	195	5.025	308	5.025	387	5.025	350	5.025	266	5.025	301	5.025	473	5.025	377	5.025	285	5.025	338
5.03	259	5.03	289	5.03	299	5.03	80	5.03	179	5.03	216	5.03	342	5.03	336	5.03	342	5.03	216	5.03	323	5.03	569	5.03	336	5.03	206	5.03	280
5.035	245	5.035	298	5.035	294	5.035	204	5.035	172	5.035	226	5.035	349	5.035	318	5.035	276	5.035	202	5.035	341	5.035	649	5.035	307	5.035	211	5.035	290
5.04	364	5.04	296	5.04	256	5.04	211	5.04	130	5.04	195	5.04	341	5.04	349	5.04	257	5.04	431	5.04	328	5.04	618	5.04	307	5.04	271	5.04	277
5.045	152	5.045	306	5.045	133	5.045	258	5.045	254	5.045	196	5.045	305	5.045	347	5.045	235	5.045	355	5.045	604	5.045	572	5.045	283	5.045	277	5.045	272
5.05	214	5.05	273	5.05	116	5.05	298	5.05	182	5.05	208	5.05	310	5.05	280	5.05	209	5.05	270	5.05	595	5.05	552	5.05	262	5.05	254	5.05	245
5.055	226	5.055	211	5.055	306	5.055	248	5.055	177	5.055	199	5.055	318	5.055	247	5.055	195	5.055	437	5.055	232	5.055	558	5.055	307	5.055	228	5.055	271
5.06	204	5.06	192	5.06	322	5.06	173	5.06	229	5.06	206	5.06	597	5.06	327	5.06	220	5.06	291	5.06	251	5.06	582	5.06	377	5.06	231	5.06	287
5.065	234	5.065	266	5.065	328	5.065	160	5.065	286	5.065	216	5.065	675	5.065	347	5.065	252	5.065	280	5.065	323	5.065	569	5.065	405	5.065	250	5.065	280
5.07	266	5.07	311	5.07	318	5.07	243	5.07	283	5.07	217	5.07	363	5.07	325	5.07	266	5.07	280	5.07	354	5.07	483	5.07	386	5.07	246	5.07	333
5.075	264	5.075	275	5.075	270	5.075	299	5.075	247	5.075	319	5.075	387	5.075	356	5.075	285	5.075	262	5.075	362	5.075	485	5.075	344	5.075	224	5.075	422
5.08	309	5.08	231	5.08	222	5.08	311	5.08	245	5.08	103	5.08	382	5.08	312	5.08	278	5.08	232	5.08	360	5.08	550	5.08	316	5.08	297	5.08	435
5.085	333	5.085	229	5.085	193	5.085	289	5.085	251	5.085	133	5.085	349	5.085	291	5.085	232	5.085	228	5.085	342	5.085	534	5.085	307	5.085	352	5.085	385
5.09	232	5.09	283	5.09	199	5.09	228	5.09	324	5.09	218	5.09	359	5.09	343	5.09	210	5.09	236	5.09	333	5.09	510	5.09	325	5.09	333	5.09	335
5.095	192	5.095	318	5.095	218	5.095	216	5.095	404	5.095	222	5.095	368	5.095	314	5.095	231	5.095	274	5.095	335	5.095	518	5.095	384	5.095	363	5.095	353
5.1	200	5.1	346	5.1	245	5.1	239	5.1	319	5.1	132	5.1	420	5.1	302	5.1	230	5.1	273	5.1	330	5.1	545	5.1	477	5.1	315	5.1	426
5.105	170	5.105	374	5.105	264	5.105	251	5.105	229	5.105	57	5.105	496	5.105	354	5.105	212	5.105	184	5.105	301	5.105	543	5.105	471	5.105	259	5.105	440
5.11	219	5.11	321	5.11	118	5.11	231	5.11	248	5.11	79	5.11	474	5.11	347	5.11	264	5.11	131	5.11	251	5.11	542	5.11	406	5.11	315	5.11	374
5.115	283	5.115	267	5.115	199	5.115	216	5.115	157	5.115	165	5.115	429	5.115	328	5.115	295	5.115	158	5.115	248	5.115	566	5.115	371	5.115	357	5.115	368
5.12	265	5.12	303	5.12	232	5.12	111	5.12	217	5.12	192	5.12	422	5.12	325	5.12	216	5.12	214	5.12	299	5.12	514	5.12	346	5.12	326	5.12	381
5.125	234	5.125	300	5.125	250	5.125	226	5.125	230	5.125	162	5.125	403	5.125	293	5.125	158	5.125	293	5.125	335	5.125	489	5.125	360	5.125	283	5.125	375
5.13	241	5.13	215	5.13	222	5.13	203	5.13	274	5.13	183	5.13	442	5.13	302	5.13	193	5.13	344	5.13	383	5.13	515	5.13	386	5.13	254	5.13	366
5.135	253	5.135	209	5.135	196	5.135	214	5.135	296	5.135	275	5.135	459	5.135	361	5.135	238	5.135	259	5.135	380	5.135	494	5.135	371	5.135	267	5.135	346
5.14	318	5.14	216	5.14	144	5.14	254	5.14	304	5.14	315	5.14	365	5.14	442	5.14	278	5.14	205	5.14	341	5.14	515	5.14	376	5.14	287	5.14	407
5.145	424	5.145	239	5.145	228	5.145	246	5.145	259	5.145	255	5.145	356	5.145	430	5.145	259	5.145	289	5.145	296	5.145	502	5.145	408	5.145	258	5.145	457
5.15	428	5.15	296	5.15	185	5.15	221	5.15	206	5.15	214	5.15	433	5.15	381	5.15	186	5.15	358	5.15	282	5.15	419	5.15	416	5.15	229	5.15	427
5.155	382	5.155	302	5.155	185	5.155	215	5.155	231	5.155	235	5.155	786	5.155	372	5.155	184	5.155	369	5.155	312	5.155	454	5.155	349	5.155	235	5.155	410
5.16	331	5.16	342	5.16	235	5.16	201	5.16	244	5.16	243	5.16	502	5.16	334	5.16	388	5.16	401	5.16	376	5.16	572	5.16	256	5.16	266	5.16	357
5.165	248	5.165	333	5.165	266	5.165	174	5.165	261	5.165	204	5.165	472	5.165	323	5.165	197	5.165	372	5.165	413	5.165	629	5.165	286	5.165	330	5.165	313
5.17	269	5.17	280	5.17	131	5.17	199	5.17	354	5.17	176	5.17	479	5.17	360	5.17	206	5.17	288	5.17	404	5.17	658	5.17	359	5.17	342	5.17	357
5.175	367	5.175	295	5.175	156	5.175	301	5.175	376	5.175	189	5.175	493	5.175	354	5.175	203	5.175	322	5.175	407	5.175	698	5.175	389	5.175	279	5.175	424
5.18	405	5.18	322	5.18	151	5.18	331	5.18	316	5.18	210	5.18	446	5.18	394	5.18	190	5.18	414	5.18	389	5.18	613	5.18	400	5.18	248	5.18	425
5.185	420	5.185	333	5.185	184	5.185	253	5.185	245	5.185	200	5.185	467	5.185	406	5.185	200	5.185	437	5.185	372	5.185	512	5.185	339	5.185	262	5.185	373
5.19	451	5.19	350	5.19	178	5.19	93	5.19	212	5.19	224	5.19	509	5.19	310	5.19	226	5.19	399	5.19	361	5.19	552	5.19	327	5.19	284	5.19	381
5.195	400	5.195	366	5.195	151	5.195	242	5.195	291	5.195	278	5.195	459	5.195	326	5.195	283	5.195	443	5.195	357	5.195	605	5.195	376	5.195	317	5.195	473
5.2	294	5.2	436	5.2	154	5.2	245	5.2	321	5.2	269	5.2	482	5.2	382	5.2	259	5.2	509	5.2	375	5.2	630	5.2	456	5.2	325	5.2	536
5.205	264	5.205	433	5.205	185	5.205	292	5.205	244	5.205	236	5.205	511	5.205	348	5.205	187	5.205	466	5.205	400	5.205	633	5.205	483	5.205	330	5.205	541
5.21	299	5.21	369	5.21	211	5.21	320	5.21	223	5.21	244	5.21	544	5.21	382	5.21	173	5.21	410	5.21	493	5.21	590	5.21	520	5.21	373	5.21	523
5.215	294	5.215	320	5.215	220	5.215	302	5.215	260	5.215	266	5.215	701	5.215	416	5.215	209	5.215	411	5.215	479	5.215	506	5.215	523	5.215	389	5.215	501
5.22	304	5.22	291	5.22	291	5.22	278	5.22	318	5.22	325	5.22	694	5.22	366	5.22	232	5.22	381	5.22	392	5.22	446	5.22	487	5.22	376	5.22	517
5.225	400	5.225	314	5.225	394	5.225	258	5.225	323	5.225	307	5.225	600	5.225	403	5.225	228	5.225	336	5.225	360	5.225	561	5.225	464	5.225	347	5.225	526
5.23	488	5.23	345	5.23	351	5.23	226	5.23	266	5.23	214	5.23	490	5.23	458	5.23	208	5.23	352	5.23	341	5.23	686	5.23	428	5.23	312	5.23	504
5.235	440	5.235	303	5.235	223	5.235	210	5.235	258	5.235	201	5.235	478	5.235	398	5.235	210	5.235	415	5.235	357	5.235	642	5.235	412	5.235	294	5.235	519
5.24	351	5.24	267	5.24	216	5.24	225	5.24	259	5.24	200	5.24	600	5.24	337	5.24	264	5.24	445	5.24	366	5.24	564	5.24	432	5.24	339	5.24	600
5.245	344	5.245	341	5.245	279	5.245	222	5.245	256	5.245	226	5.245	674	5.245	342	5.245	295	5.245	449	5.245	334	5.245	579	5.245	456	5.245	402	5.245	593
5.25	362	5.25	403	5.25	237	5.25	227	5.25	259	5.25	241	5.25	631	5.25	374	5.25	291	5.25	432	5.25	319	5.25	571	5.25	498	5.25	457	5.25	554
5.255	363	5.255	384	5.255	194	5.255	287	5.255	220	5.255	249	5.255	648	5.255	400	5.255	352	5.255	365	5.255	273	5.255	578	5.255	565	5.255	393	5.255	486
5.26	397	5.26	320	5.26	210	5.26	295	5.26	212	5.26	248	5.26	687	5.26	418	5.26	381	5.26	345	5.26	315	5.26	587	5.26	600	5.26	298	5.26	442
5.265	434	5.265	261	5.265	264	5.265	242	5.265	219	5.265	220	5.265	637	5.265	400	5.265	296	5.265	331	5.265	425	5.265	629	5.265	509	5.265	307	5.265	447
5.27	420	5.27	261	5.27	331	5.27	220	5.27	192	5.27	222	5.27	560	5.27	388	5.27	258	5.27	285	5.27	496	5.27	638	5.27	400	5.27	332	5.27	483
5.275	373	5.275	270	5.275	320	5.275	203	5.275	190	5.275	204	5.275	564	5.275	405	5.275	273	5.275	326	5.275	439	5.275	591	5.275	401	5.275	314	5.275	541
5.28	383	5.28	236	5.28	252	5.28	245	5.28	179	5.28	218	5.28	629	5.28	384	5.28	256	5.28	375	5.28	341	5.28	595	5.28	416	5.28	308	5.28	549
5.285	379	5.285	224	5.285	192	5.285	335	5.285	136	5.285	259	5.285	592	5.285	350	5.285	212	5.285	368	5.285	345	5.285	663	5.285	398	5.285	358	5.285	571
5.29	309	5.29	279	5.29	184	5.29	324	5.29	123	5.29	264	5.29	520	5.29	386	5.29	220	5.29	358	5.29	363	5.29	641	5.29	418	5.29	386	5.29	621
5.295	335	5.295	356	5.295	206	5.295	242	5.295	286	5.295	293	5.295	610	5.295	429	5.295	294	5.295	348	5.295	339	5.295	550	5.295	432	5.295	325	5.295	564
5.3	378	5.3	389	5.3	234	5.3	208	5.3	321	5.3	342	5.3	727	5.3	397	5.3	293	5.3	340	5.3	362	5.3	616	5.3	386	5.3	264	5.3	561
5.305	316	5.305	342	5.305	259	5.305	223	5.305	322	5.305	271	5.305	736	5.305	359	5.305	232	5.305	349	5.305	424	5.305	748	5.305	322	5.305	337	5.305	588
5.31	362	5.31	282	5.31	266	5.31	246	5.31	287	5.31	171	5.31	601	5.31	394	5.31	253	5.31	359	5.31	414	5.31	742	5.31	331	5.31	413	5.31	605
5.315	480	5.315	313	5.315	263	5.315	252	5.315	268	5.315	237	5.315	528	5.315	458	5.315	292	5.315	392	5.315	360	5.315	605	5.315	392	5.315	360	5.315	592
5.32	475	5.32	371	5.32	279	5.32	242	5.32	283	5.32	329	5.32	597	5.32	443	5.32	245	5.32	400	5.32	388	5.32	528	5.32	453	5.32	346	5.32	534
5.325	419	5.325	311	5.325	360	5.325	226	5.325	264	5.325	323	5.325	623	5.325	377	5.325	221	5.325	347	5.325	427	5.325	594	5.325	469	5.325	403	5.325	480
5.33	467	5.33	246	5.33	421	5.33	228	5.33	222	5.33	333	5.33	584	5.33	350	5.33	299	5.33	292	5.33	408	5.33	647	5.33	470	5.33	430	5.33	435
5.335	537	5.335	289	5.335	392	5.335	237	5.335	215	5.335	366	5.335	482	5.335	350	5.335	379	5.335	271	5.335	399	5.335	632	5.335	437	5.335	391	5.335	492
5.34	616	5.34	309	5.34	329	5.34	251	5.34	255	5.34	380	5.34	482	5.34	352	5.34	355	5.34	369	5.34	435	5.34	594	5.34	385	5.34	372	5.34	544
5.345	740	5.345	256	5.345	252	5.345	308	5.345	245	5.345	368	5.345	610	5.345	352	5.345	307	5.345	483	5.345	449	5.345	629	5.345	442	5.345	417	5.345	520
5.35	808	5.35	233	5.35	258	5.35	197	5.35	195	5.35	389	5.35	744	5.35	380	5.35	310	5.35	445	5.35	400	5.35	717	5.35	506	5.35	459	5.35	552
5.355	843	5.355	297	5.355	290	5.355	284	5.355	162	5.355	483	5.355	809	5.355	474	5.355	303	5.355	488	5.355	393	5.355	713	5.355	507	5.355	440	5.355	611
5.36	899	5.36	390	5.36	177	5.36	269	5.36	205	5.36	626	5.36	736	5.36	525	5.36	298	5.36	551	5.36	464	5.36	720	5.36	515	5.36	372	5.36	615
5.365	996	5.365	380	5.365	126	5.365	254	5.365	246	5.365	726	5.365	723	5.365	472	5.365	362	5.365	580	5.365	557	5.365	807	5.365	594	5.365	349	5.365	613
5.37	1142	5.37	358	5.37	243	5.37	198	5.37	199	5.37	727	5.37	836	5.37	492	5.37	411	5.37	836	5.37	620	5.37	896	5.37	683	5.37	366	5.37	644
5.375	1263	5.375	347	5.375	318	5.375	175	5.375	136	5.375	851	5.375	860	5.375	565	5.375	378	5.375	1067	5.375	611	5.375	995	5.375	720	5.375	405	5.375	779
5.38	1357	5.38	290	5.38	305	5.38	205	5.38	174	5.38	952	5.38	874	5.38	654	5.38	408	5.38	1065	5.38	606	5.38	1113	5.38	780	5.38	456	5.38	1042
5.385	1433	5.385	250	5.385	271	5.385	237	5.385	298	5.385	952	5.385	1000	5.385	742	5.385	502	5.385	1196	5.385	678	5.385	1216	5.385	812	5.385	491	5.385	1195
5.39	1421	5.39	224	5.39	258	5.39	233	5.39	378	5.39	1082	5.39	1209	5.39	817	5.39	615	5.39	1267	5.39	717	5.39	1316	5.39	863	5.39	611	5.39	1144
5.395	1521	5.395	226	5.395	247	5.395	229	5.395	338	5.395	1237	5.395	2375	5.395	981	5.395	698	5.395	1242	5.395	758	5.395	1478	5.395	1028	5.395	1472	5.395	1136
5.4	1630	5.4	306	5.4	217	5.4	240	5.4	231	5.4	1334	5.4	1654	5.4	1083	5.4	739	5.4	2393	5.4	922	5.4	1762	5.4	1204	5.4	913	5.4	1290
5.405	1545	5.405	356	5.405	237	5.405	219	5.405	172	5.405	1466	5.405	1840	5.405	1043	5.405	805	5.405	2781	5.405	1070	5.405	2044	5.405	1430	5.405	1154	5.405	1440
5.41	1503	5.41	329	5.41	234	5.41	223	5.41	219	5.41	1590	5.41	2033	5.41	1044	5.41	809	5.41	2721	5.41	1075	5.41	2202	5.41	1641	5.41	1339	5.41	1713
5.415	1657	5.415	315	5.415	189	5.415	245	5.415	283	5.415	1632	5.415	3801	5.415	1202	5.415	790	5.415	1489	5.415	1123	5.415	2436	5.415	1804	5.415	1299	5.415	2100
5.42	1881	5.42	342	5.42	230	5.42	194	5.42	244	5.42	1512	5.42	4307	5.42	1394	5.42	807	5.42	1621	5.42	1284	5.42	2661	5.42	1808	5.42	1416	5.42	2366
5.425	1985	5.425	353	5.425	309	5.425	153	5.425	188	5.425	1413	5.425	2706	5.425	2580	5.425	850	5.425	1823	5.425	1398	5.425	2768	5.425	1780	5.425	1593	5.425	2431
5.43	3155	5.43	319	5.43	339	5.43	204	5.43	213	5.43	1448	5.43	2927	5.43	1755	5.43	969	5.43	1973	5.43	1474	5.43	2966	5.43	1838	5.43	2890	5.43	2563
5.435	1956	5.435	300	5.435	315	5.435	303	5.435	266	5.435	1501	5.435	3099	5.435	2019	5.435	1043	5.435	1886	5.435	1477	5.435	3337	5.435	1883	5.435	1845	5.435	2857
5.44	1828	5.44	322	5.44	290	5.44	354	5.44	282	5.44	1507	5.44	3200	5.44	2068	5.44	1033	5.44	1776	5.44	1517	5.44	3511	5.44	1997	5.44	2029	5.44	2908
5.445	1611	5.445	378	5.445	257	5.445	264	5.445	306	5.445	1478	5.445	3334	5.445	3617	5.445	1119	5.445	1794	5.445	1612	5.445	3570	5.445	2044	5.445	2130	5.445	2778
5.45	1485	5.45	379	5.45	251	5.45	202	5.45	318	5.45	1579	5.45	3337	5.45	3765	5.45	1315	5.45	1856	5.45	1696	5.45	3845	5.45	2060	5.45	2130	5.45	2741
5.455	1496	5.455	327	5.455	260	5.455	188	5.455	279	5.455	1664	5.455	3119	5.455	3723	5.455	1372	5.455	1721	5.455	1753	5.455	3899	5.455	2217	5.455	2052	5.455	2897
5.46	2830	5.46	308	5.46	257	5.46	190	5.46	322	5.46	1530	5.46	3184	5.46	2024	5.46	1291	5.46	1515	5.46	1667	5.46	3829	5.46	2326	5.46	2104	5.46	3177
5.465	2799	5.465	289	5.465	279	5.465	258	5.465	322	5.465	1406	5.465	3528	5.465	2175	5.465	1262	5.465	1478	5.465	1664	5.465	3967	5.465	2369	5.465	2163	5.465	3581
5.47	1430	5.47	274	5.47	310	5.47	336	5.47	311	5.47	1474	5.47	3608	5.47	2330	5.47	1213	5.47	1558	5.47	1744	5.47	3988	5.47	2383	5.47	2207	5.47	3875
5.475	1640	5.475	297	5.475	362	5.475	354	5.475	385	5.475	1536	5.475	3493	5.475	2131	5.475	1153	5.475	1677	5.475	1768	5.475	3866	5.475	2304	5.475	3988	5.475	3649
5.48	1883	5.48	314	5.48	392	5.48	339	5.48	390	5.48	1435	5.48	3391	5.48	2061	5.48	1179	5.48	1644	5.48	1764	5.48	3778	5.48	4112	5.48	3739	5.48	3171
5.485	1699	5.485	331	5.485	360	5.485	278	5.485	336	5.485	1420	5.485	6042	5.485	2135	5.485	1201	5.485	1468	5.485	2893	5.485	3761	5.485	2230	5.485	2048	5.485	3178
5.49	1436	5.49	324	5.49	319	5.49	251	5.49	310	5.49	1553	5.49	6083	5.49	1956	5.49	1166	5.49	2529	5.49	1613	5.49	3794	5.49	2223	5.49	2037	5.49	3274
5.495	1496	5.495	278	5.495	271	5.495	325	5.495	279	5.495	1440	5.495	3482	5.495	1838	5.495	1189	5.495	2681	5.495	1557	5.495	3742	5.495	2299	5.495	2011	5.495	2987
5.5	1561	5.5	323	5.5	297	5.5	325	5.5	343	5.5	1231	5.5	3416	5.5	1926	5.5	1216	5.5	2851	5.5	1622	5.5	3636	5.5	2375	5.5	2048	5.5	2859
5.505	1464	5.505	383	5.505	300	5.505	248	5.505	417	5.505	1195	5.505	3350	5.505	1998	5.505	1996	5.505	2800	5.505	1664	5.505	3726	5.505	2217	5.505	2051	5.505	5237
5.51	1477	5.51	335	5.51	233	5.51	210	5.51	379	5.51	1173	5.51	3214	5.51	2045	5.51	1984	5.51	1623	5.51	1609	5.51	3655	5.51	2041	5.51	1998	5.51	2921
5.515	1504	5.515	279	5.515	238	5.515	188	5.515	374	5.515	1088	5.515	3095	5.515	2016	5.515	1046	5.515	1485	5.515	1524	5.515	3332	5.515	1995	5.515	1992	5.515	2714
5.52	1435	5.52	264	5.52	284	5.52	204	5.52	346	5.52	1054	5.52	2985	5.52	1979	5.52	1008	5.52	1347	5.52	1470	5.52	3159	5.52	2123	5.52	1925	5.52	2725
5.525	1325	5.525	303	5.525	265	5.525	221	5.525	294	5.525	1051	5.525	2916	5.525	2027	5.525	1095	5.525	1275	5.525	1514	5.525	3198	5.525	2291	5.525	1712	5.525	2754
5.53	1227	5.53	349	5.53	245	5.53	212	5.53	318	5.53	939	5.53	2965	5.53	1946	5.53	1133	5.53	1223	5.53	1542	5.53	3275	5.53	2184	5.53	1620	5.53	2701
5.535	1241	5.535	378	5.535	271	5.535	176	5.535	328	5.535	804	5.535	2936	5.535	1856	5.535	1117	5.535	1118	5.535	1604	5.535	3335	5.535	2005	5.535	1665	5.535	2615
5.54	1256	5.54	391	5.54	311	5.54	180	5.54	294	5.54	831	5.54	2808	5.54	1845	5.54	1176	5.54	970	5.54	1669	5.54	3318	5.54	2009	5.54	1680	5.54	2590
5.545	1230	5.545	331	5.545	329	5.545	261	5.545	293	5.545	890	5.545	2595	5.545	1749	5.545	1139	5.545	882	5.545	1520	5.545	3131	5.545	1957	5.545	1731	5.545	2549
5.55	1164	5.55	231	5.55	278	5.55	331	5.55	341	5.55	834	5.55	2439	5.55	1717	5.55	1030	5.55	956	5.55	1323	5.55	2867	5.55	1772	5.55	3023	5.55	2348
5.555	1059	5.555	135	5.555	232	5.555	294	5.555	342	5.555	812	5.555	2426	5.555	1708	5.555	1004	5.555	1015	5.555	1305	5.555	2676	5.555	1756	5.555	3014	5.555	2234
5.56	1018	5.56	294	5.56	242	5.56	242	5.56	249	5.56	821	5.56	2288	5.56	2813	5.56	1028	5.56	1603	5.56	1372	5.56	2790	5.56	1795	5.56	1544	5.56	2187
5.565	970	5.565	274	5.565	283	5.565	299	5.565	184	5.565	850	5.565	2191	5.565	2585	5.565	993	5.565	1582	5.565	1408	5.565	2944	5.565	1723	5.565	1439	5.565	2123
5.57	945	5.57	312	5.57	249	5.57	348	5.57	288	5.57	906	5.57	2286	5.57	2453	5.57	941	5.57	867	5.57	1377	5.57	2891	5.57	1653	5.57	1477	5.57	2115
5.575	1050	5.575	337	5.575	189	5.575	317	5.575	421	5.575	864	5.575	2317	5.575	2531	5.575	909	5.575	957	5.575	1274	5.575	2865	5.575	1596	5.575	1435	5.575	2155
5.58	1134	5.58	272	5.58	212	5.58	241	5.58	415	5.58	1411	5.58	2194	5.58	2755	5.58	804	5.58	2000	5.58	1222	5.58	2691	5.58	1566	5.58	1349	5.58	2155
5.585	928	5.585	232	5.585	294	5.585	212	5.585	339	5.585	860	5.585	3781	5.585	2767	5.585	752	5.585	924	5.585	1187	5.585	2402	5.585	1584	5.585	1378	5.585	2076
5.59	777	5.59	263	5.59	365	5.59	252	5.59	298	5.59	730	5.59	3597	5.59	2540	5.59	752	5.59	837	5.59	1061	5.59	2409	5.59	1627	5.59	1392	5.59	1991
5.595	888	5.595	268	5.595	408	5.595	287	5.595	306	5.595	668	5.595	3523	5.595	1322	5.595	675	5.595	788	5.595	1021	5.595	2532	5.595	1608	5.595	2417	5.595	1894
5.6	910	5.6	218	5.6	405	5.6	276	5.6	326	5.6	1272	5.6	1867	5.6	1287	5.6	696	5.6	756	5.6	1120	5.6	2525	5.6	1500	5.6	2302	5.6	1832
5.605	822	5.605	221	5.605	355	5.605	254	5.605	284	5.605	702	5.605	1762	5.605	1228	5.605	765	5.605	712	5.605	1177	5.605	2446	5.605	1373	5.605	2270	5.605	1831
5.61	752	5.61	259	5.61	320	5.61	257	5.61	212	5.61	645	5.61	1769	5.61	1118	5.61	731	5.61	715	5.61	1184	5.61	2355	5.61	1267	5.61	1325	5.61	1773
5.615	661	5.615	294	5.615	309	5.615	246	5.615	206	5.615	1033	5.615	1853	5.615	2003	5.615	755	5.615	698	5.615	1263	5.615	2267	5.615	1211	5.615	1291	5.615	1761
5.62	575	5.62	302	5.62	282	5.62	191	5.62	232	5.62	1001	5.62	1850	5.62	1254	5.62	793	5.62	626	5.62	1277	5.62	2253	5.62	1158	5.62	1241	5.62	1790
5.625	1091	5.625	314	5.625	209	5.625	199	5.625	240	5.625	544	5.625	1719	5.625	1284	5.625	703	5.625	610	5.625	1160	5.625	2216	5.625	1174	5.625	1368	5.625	1792
5.63	651	5.63	342	5.63	200	5.63	251	5.63	274	5.63	1124	5.63	1537	5.63	1192	5.63	707	5.63	626	5.63	1079	5.63	2125	5.63	1285	5.63	1344	5.63	1737
5.635	1333	5.635	330	5.635	277	5.635	276	5.635	361	5.635	1159	5.635	1440	5.635	1013	5.635	726	5.635	627	5.635	979	5.635	2033	5.635	1288	5.635	1246	5.635	1645
5.64	712	5.64	286	5.64	337	5.64	285	5.64	348	5.64	680	5.64	1539	5.64	976	5.64	623	5.64	619	5.64	1700	5.64	1952	5.64	1194	5.64	1212	5.64	1566
5.645	621	5.645	285	5.645	351	5.645	304	5.645	252	5.645	583	5.645	2831	5.645	1111	5.645	637	5.645	653	5.645	1037	5.645	1900	5.645	1225	5.645	1180	5.645	1443
5.65	725	5.65	294	5.65	299	5.65	317	5.65	252	5.65	499	5.65	2706	5.65	2102	5.65	756	5.65	685	5.65	1168	5.65	1932	5.65	2150	5.65	1146	5.65	1282
5.655	807	5.655	284	5.655	244	5.655	288	5.655	315	5.655	542	5.655	2528	5.655	1093	5.655	811	5.655	677	5.655	1192	5.655	2069	5.655	1211	5.655	1106	5.655	1251
5.66	739	5.66	251	5.66	229	5.66	261	5.66	314	5.66	556	5.66	1312	5.66	1124	5.66	771	5.66	664	5.66	1027	5.66	2120	5.66	1191	5.66	1092	5.66	2410
5.665	638	5.665	290	5.665	239	5.665	318	5.665	231	5.665	492	5.665	1295	5.665	1117	5.665	727	5.665	603	5.665	951	5.665	1953	5.665	1171	5.665	1080	5.665	2462
5.67	627	5.67	363	5.67	263	5.67	386	5.67	161	5.67	809	5.67	2211	5.67	979	5.67	647	5.67	602	5.67	937	5.67	1840	5.67	1080	5.67	1011	5.67	1577
5.675	601	5.675	311	5.675	236	5.675	345	5.675	162	5.675	429	5.675	1198	5.675	879	5.675	543	5.675	605	5.675	868	5.675	1776	5.675	942	5.675	942	5.675	1467
5.68	546	5.68	254	5.68	258	5.68	253	5.68	181	5.68	410	5.68	1146	5.68	917	5.68	519	5.68	498	5.68	902	5.68	1654	5.68	897	5.68	913	5.68	1259
5.685	553	5.685	255	5.685	330	5.685	226	5.685	210	5.685	431	5.685	1206	5.685	914	5.685	604	5.685	488	5.685	898	5.685	1589	5.685	930	5.685	931	5.685	1134
5.69	572	5.69	250	5.69	280	5.69	214	5.69	241	5.69	470	5.69	2243	5.69	831	5.69	691	5.69	618	5.69	842	5.69	1657	5.69	903	5.69	955	5.69	1059
5.695	507	5.695	271	5.695	201	5.695	201	5.695	234	5.695	414	5.695	2183	5.695	848	5.695	664	5.695	667	5.695	954	5.695	1602	5.695	902	5.695	925	5.695	1049
5.7	417	5.7	302	5.7	219	5.7	234	5.7	239	5.7	329	5.7	1244	5.7	865	5.7	630	5.7	570	5.7	1069	5.7	1508	5.7	948	5.7	861	5.7	1156
5.705	385	5.705	290	5.705	265	5.705	257	5.705	237	5.705	299	5.705	1303	5.705	801	5.705	631	5.705	461	5.705	961	5.705	1511	5.705	898	5.705	782	5.705	1186
5.71	673	5.71	255	5.71	252	5.71	248	5.71	199	5.71	288	5.71	1192	5.71	857	5.71	538	5.71	444	5.71	778	5.71	1371	5.71	847	5.71	768	5.71	1141
5.715	319	5.715	272	5.715	242	5.715	274	5.715	248	5.715	218	5.715	1888	5.715	992	5.715	530	5.715	413	5.715	722	5.715	1313	5.715	826	5.715	798	5.715	1134
5.72	282	5.72	331	5.72	226	5.72	293	5.72	283	5.72	164	5.72	1708	5.72	910	5.72	552	5.72	288	5.72	719	5.72	1483	5.72	797	5.72	754	5.72	1057
5.725	249	5.725	370	5.725	204	5.725	251	5.725	234	5.725	160	5.725	1010	5.725	765	5.725	517	5.725	246	5.725	643	5.725	1449	5.725	824	5.725	1329	5.725	853
5.73	255	5.73	361	5.73	209	5.73	192	5.73	245	5.73	159	5.73	1067	5.73	746	5.73	392	5.73	281	5.73	624	5.73	1334	5.73	798	5.73	626	5.73	768
5.735	293	5.735	301	5.735	212	5.735	157	5.735	289	5.735	187	5.735	953	5.735	717	5.735	270	5.735	269	5.735	644	5.735	1249	5.735	648	5.735	646	5.735	797
5.74	314	5.74	217	5.74	251	5.74	179	5.74	281	5.74	199	5.74	794	5.74	678	5.74	221	5.74	231	5.74	539	5.74	990	5.74	548	5.74	542	5.74	752
5.745	286	5.745	175	5.745	296	5.745	219	5.745	244	5.745	163	5.745	650	5.745	1113	5.745	226	5.745	198	5.745	465	5.745	793	5.745	485	5.745	427	5.745	1063
5.75	266	5.75	210	5.75	328	5.75	248	5.75	192	5.75	159	5.75	521	5.75	517	5.75	247	5.75	207	5.75	445	5.75	772	5.75	402	5.75	408	5.75	946
5.755	278	5.755	262	5.755	372	5.755	259	5.755	171	5.755	183	5.755	437	5.755	348	5.755	248	5.755	205	5.755	369	5.755	609	5.755	416	5.755	397	5.755	417
5.76	256	5.76	165	5.76	335	5.76	273	5.76	197	5.76	179	5.76	365	5.76	304	5.76	196	5.76	209	5.76	321	5.76	427	5.76	406	5.76	323	5.76	294
5.765	272	5.765	286	5.765	281	5.765	276	5.765	185	5.765	158	5.765	301	5.765	316	5.765	156	5.765	254	5.765	278	5.765	349	5.765	303	5.765	254	5.765	264
5.77	306	5.77	278	5.77	239	5.77	265	5.77	199	5.77	131	5.77	280	5.77	303	5.77	163	5.77	305	5.77	198	5.77	373	5.77	269	5.77	208	5.77	235
5.775	254	5.775	294	5.775	200	5.775	263	5.775	222	5.775	153	5.775	324	5.775	294	5.775	179	5.775	286	5.775	148	5.775	382	5.775	296	5.775	184	5.775	214
5.78	244	5.78	321	5.78	285	5.78	239	5.78	222	5.78	176	5.78	323	5.78	279	5.78	145	5.78	214	5.78	172	5.78	351	5.78	268	5.78	237	5.78	249
5.785	283	5.785	339	5.785	392	5.785	183	5.785	261	5.785	156	5.785	324	5.785	298	5.785	97	5.785	227	5.785	211	5.785	405	5.785	256	5.785	312	5.785	323
5.79	275	5.79	323	5.79	300	5.79	187	5.79	277	5.79	160	5.79	312	5.79	312	5.79	103	5.79	266	5.79	204	5.79	427	5.79	222	5.79	314	5.79	255
5.795	259	5.795	295	5.795	215	5.795	222	5.795	223	5.795	166	5.795	289	5.795	267	5.795	125	5.795	261	5.795	189	5.795	440	5.795	238	5.795	279	5.795	248
5.8	253	5.8	287	5.8	254	5.8	278	5.8	169	5.8	182	5.8	298	5.8	232	5.8	118	5.8	224	5.8	174	5.8	464	5.8	248	5.8	245	5.8	331
5.805	240	5.805	282	5.805	262	5.805	284	5.805	158	5.805	235	5.805	302	5.805	221	5.805	136	5.805	213	5.805	180	5.805	438	5.805	244	5.805	186	5.805	339
5.81	257	5.81	292	5.81	255	5.81	259	5.81	180	5.81	243	5.81	279	5.81	184	5.81	158	5.81	205	5.81	199	5.81	436	5.81	210	5.81	127	5.81	313
5.815	275	5.815	318	5.815	264	5.815	258	5.815	192	5.815	187	5.815	249	5.815	173	5.815	164	5.815	214	5.815	193	5.815	460	5.815	198	5.815	150	5.815	274
5.82	235	5.82	300	5.82	237	5.82	249	5.82	205	5.82	149	5.82	306	5.82	203	5.82	140	5.82	248	5.82	206	5.82	418	5.82	219	5.82	214	5.82	226
5.825	239	5.825	277	5.825	234	5.825	281	5.825	235	5.825	128	5.825	338	5.825	230	5.825	114	5.825	232	5.825	183	5.825	389	5.825	256	5.825	248	5.825	203
5.83	269	5.83	310	5.83	253	5.83	289	5.83	220	5.83	128	5.83	261	5.83	243	5.83	128	5.83	181	5.83	167	5.83	414	5.83	267	5.83	235	5.83	245
5.835	264	5.835	326	5.835	204	5.835	245	5.835	228	5.835	161	5.835	248	5.835	218	5.835	173	5.835	163	5.835	192	5.835	384	5.835	256	5.835	237	5.835	244
5.84	278	5.84	312	5.84	199	5.84	266	5.84	255	5.84	227	5.84	250	5.84	213	5.84	178	5.84	201	5.84	200	5.84	361	5.84	251	5.84	240	5.84	239
5.845	293	5.845	265	5.845	241	5.845	390	5.845	265	5.845	256	5.845	246	5.845	234	5.845	143	5.845	229	5.845	190	5.845	402	5.845	232	5.845	270	5.845	243
5.85	243	5.85	213	5.85	222	5.85	246	5.85	275	5.85	192	5.85	277	5.85	248	5.85	176	5.85	252	5.85	176	5.85	395	5.85	243	5.85	320	5.85	295
5.855	202	5.855	217	5.855	191	5.855	322	5.855	251	5.855	136	5.855	287	5.855	275	5.855	168	5.855	221	5.855	162	5.855	370	5.855	266	5.855	304	5.855	293
5.86	157	5.86	313	5.86	203	5.86	226	5.86	227	5.86	144	5.86	297	5.86	284	5.86	135	5.86	210	5.86	184	5.86	395	5.86	293	5.86	253	5.86	236
5.865	157	5.865	396	5.865	221	5.865	227	5.865	154	5.865	141	5.865	309	5.865	227	5.865	187	5.865	211	5.865	182	5.865	433	5.865	295	5.865	237	5.865	219
5.87	181	5.87	405	5.87	184	5.87	232	5.87	103	5.87	155	5.87	320	5.87	209	5.87	199	5.87	214	5.87	216	5.87	446	5.87	238	5.87	196	5.87	206
5.875	184	5.875	376	5.875	181	5.875	217	5.875	164	5.875	182	5.875	264	5.875	257	5.875	153	5.875	230	5.875	259	5.875	447	5.875	184	5.875	156	5.875	218
5.88	192	5.88	344	5.88	237	5.88	242	5.88	204	5.88	155	5.88	214	5.88	285	5.88	144	5.88	223	5.88	202	5.88	447	5.88	249	5.88	182	5.88	271
5.885	238	5.885	345	5.885	256	5.885	236	5.885	219	5.885	127	5.885	245	5.885	282	5.885	160	5.885	198	5.885	168	5.885	426	5.885	322	5.885	276	5.885	260
5.89	281	5.89	343	5.89	243	5.89	206	5.89	231	5.89	151	5.89	284	5.89	251	5.89	162	5.89	224	5.89	182	5.89	415	5.89	285	5.89	315	5.89	213
5.895	302	5.895	281	5.895	251	5.895	260	5.895	221	5.895	172	5.895	264	5.895	232	5.895	143	5.895	275	5.895	210	5.895	397	5.895	221	5.895	261	5.895	195
5.9	325	5.9	253	5.9	260	5.9	267	5.9	196	5.9	170	5.9	325	5.9	207	5.9	144	5.9	288	5.9	202	5.9	340	5.9	221	5.9	203	5.9	226
5.905	244	5.905	298	5.905	286	5.905	208	5.905	204	5.905	189	5.905	344	5.905	197	5.905	166	5.905	296	5.905	171	5.905	311	5.905	214	5.905	199	5.905	287
5.91	257	5.91	302	5.91	300	5.91	203	5.91	200	5.91	241	5.91	291	5.91	195	5.91	186	5.91	328	5.91	187	5.91	300	5.91	209	5.91	224	5.91	301
5.915	268	5.915	265	5.915	274	5.915	207	5.915	172	5.915	239	5.915	221	5.915	151	5.915	197	5.915	296	5.915	233	5.915	319	5.915	243	5.915	210	5.915	253
5.92	253	5.92	285	5.92	213	5.92	235	5.92	178	5.92	251	5.92	181	5.92	151	5.92	208	5.92	214	5.92	218	5.92	349	5.92	257	5.92	200	5.92	244
5.925	235	5.925	166	5.925	215	5.925	320	5.925	172	5.925	264	5.925	203	5.925	149	5.925	219	5.925	157	5.925	208	5.925	352	5.925	280	5.925	208	5.925	271
5.93	248	5.93	382	5.93	305	5.93	305	5.93	130	5.93	238	5.93	264	5.93	152	5.93	237	5.93	201	5.93	205	5.93	394	5.93	280	5.93	208	5.93	272
5.935	309	5.935	325	5.935	340	5.935	247	5.935	119	5.935	180	5.935	268	5.935	197	5.935	234	5.935	251	5.935	139	5.935	410	5.935	233	5.935	227	5.935	274
5.94	295	5.94	308	5.94	270	5.94	238	5.94	137	5.94	181	5.94	249	5.94	289	5.94	168	5.94	255	5.94	152	5.94	398	5.94	188	5.94	199	5.94	278
5.945	235	5.945	243	5.945	227	5.945	188	5.945	183	5.945	226	5.945	266	5.945	317	5.945	127	5.945	205	5.945	186	5.945	381	5.945	163	5.945	183	5.945	248
5.95	220	5.95	194	5.95	216	5.95	190	5.95	227	5.95	231	5.95	283	5.95	288	5.95	153	5.95	182	5.95	178	5.95	330	5.95	185	5.95	197	5.95	225
5.955	290	5.955	249	5.955	167	5.955	210	5.955	191	5.955	228	5.955	317	5.955	316	5.955	159	5.955	212	5.955	161	5.955	306	5.955	204	5.955	220	5.955	216
5.96	321	5.96	267	5.96	156	5.96	181	5.96	146	5.96	195	5.96	330	5.96	324	5.96	129	5.96	261	5.96	176	5.96	302	5.96	216	5.96	226	5.96	230
5.965	287	5.965	205	5.965	214	5.965	167	5.965	136	5.965	149	5.965	347	5.965	262	5.965	105	5.965	178	5.965	206	5.965	313	5.965	267	5.965	240	5.965	226
5.97	269	5.97	205	5.97	226	5.97	155	5.97	120	5.97	144	5.97	344	5.97	283	5.97	149	5.97	201	5.97	193	5.97	370	5.97	296	5.97	189	5.97	194
5.975	331	5.975	264	5.975	224	5.975	174	5.975	179	5.975	148	5.975	317	5.975	304	5.975	172	5.975	203	5.975	240	5.975	402	5.975	244	5.975	214	5.975	159
5.98	365	5.98	283	5.98	265	5.98	215	5.98	219	5.98	115	5.98	326	5.98	304	5.98	158	5.98	155	5.98	238	5.98	404	5.98	190	5.98	259	5.98	128
5.985	304	5.985	238	5.985	265	5.985	247	5.985	145	5.985	105	5.985	243	5.985	283	5.985	188	5.985	200	5.985	224	5.985	421	5.985	205	5.985	274	5.985	138
5.99	231	5.99	197	5.99	219	5.99	284	5.99	116	5.99	119	5.99	181	5.99	238	5.99	197	5.99	272	5.99	224	5.99	333	5.99	256	5.99	219	5.99	165
5.995	154	5.995	201	5.995	196	5.995	302	5.995	171	5.995	101	5.995	236	5.995	206	5.995	147	5.995	248	5.995	161	5.995	308	5.995	284	5.995	175	5.995	216
6	205	6	260	6	231	6	251	6	224	6	100	6	304	6	205	6	134	6	224	6	144	6	356	6	269	6	178	6	267
6.005	267	6.005	316	6.005	281	6.005	200	6.005	202	6.005	145	6.005	315	6.005	245	6.005	120	6.005	220	6.005	169	6.005	373	6.005	245	6.005	280	6.005	276
6.01	267	6.01	396	6.01	304	6.01	181	6.01	182	6.01	132	6.01	315	6.01	236	6.01	102	6.01	216	6.01	198	6.01	383	6.01	271	6.01	327	6.01	250
6.015	253	6.015	467	6.015	307	6.015	230	6.015	205	6.015	137	6.015	257	6.015	228	6.015	130	6.015	233	6.015	203	6.015	394	6.015	246	6.015	256	6.015	246
6.02	262	6.02	403	6.02	278	6.02	285	6.02	241	6.02	117	6.02	266	6.02	242	6.02	159	6.02	224	6.02	203	6.02	398	6.02	237	6.02	210	6.02	255
6.025	266	6.025	275	6.025	235	6.025	258	6.025	271	6.025	125	6.025	310	6.025	189	6.025	118	6.025	178	6.025	184	6.025	371	6.025	289	6.025	193	6.025	234
6.03	232	6.03	228	6.03	229	6.03	210	6.03	274	6.03	144	6.03	298	6.03	148	6.03	95	6.03	180	6.03	185	6.03	348	6.03	262	6.03	176	6.03	261
6.035	225	6.035	247	6.035	256	6.035	240	6.035	239	6.035	145	6.035	232	6.035	184	6.035	134	6.035	193	6.035	177	6.035	397	6.035	178	6.035	181	6.035	248
6.04	270	6.04	294	6.04	272	6.04	295	6.04	233	6.04	144	6.04	243	6.04	225	6.04	130	6.04	171	6.04	197	6.04	443	6.04	166	6.04	181	6.04	215
6.045	300	6.045	353	6.045	280	6.045	298	6.045	251	6.045	150	6.045	256	6.045	244	6.045	167	6.045	177	6.045	213	6.045	354	6.045	224	6.045	180	6.045	244
6.05	329	6.05	336	6.05	295	6.05	243	6.05	200	6.05	165	6.05	253	6.05	256	6.05	214	6.05	216	6.05	246	6.05	279	6.05	221	6.05	166	6.05	280
6.055	310	6.055	271	6.055	295	6.055	202	6.055	209	6.055	211	6.055	237	6.055	264	6.055	178	6.055	229	6.055	268	6.055	306	6.055	196	6.055	206	6.055	248
6.06	255	6.06	276	6.06	270	6.06	247	6.06	232	6.06	258	6.06	232	6.06	275	6.06	131	6.06	205	6.06	258	6.06	337	6.06	207	6.06	257	6.06	235
6.065	218	6.065	305	6.065	215	6.065	299	6.065	207	6.065	256	6.065	266	6.065	280	6.065	104	6.065	203	6.065	269	6.065	342	6.065	195	6.065	278	6.065	216
6.07	218	6.07	316	6.07	151	6.07	283	6.07	219	6.07	184	6.07	302	6.07	267	6.07	129	6.07	224	6.07	248	6.07	351	6.07	192	6.07	256	6.07	174
6.075	236	6.075	327	6.075	125	6.075	280	6.075	242	6.075	122	6.075	301	6.075	234	6.075	134	6.075	185	6.075	206	6.075	346	6.075	150	6.075	196	6.075	221
6.08	222	6.08	316	6.08	157	6.08	276	6.08	189	6.08	157	6.08	282	6.08	219	6.08	128	6.08	179	6.08	264	6.08	322	6.08	179	6.08	165	6.08	303
6.085	192	6.085	321	6.085	227	6.085	211	6.085	151	6.085	174	6.085	280	6.085	257	6.085	168	6.085	220	6.085	310	6.085	328	6.085	230	6.085	160	6.085	302
6.09	175	6.09	145	6.09	273	6.09	194	6.09	245	6.09	181	6.09	298	6.09	309	6.09	167	6.09	205	6.09	224	6.09	311	6.09	317	6.09	166	6.09	239
6.095	225	6.095	293	6.095	254	6.095	216	6.095	308	6.095	168	6.095	278	6.095	352	6.095	115	6.095	189	6.095	157	6.095	276	6.095	320	6.095	274	6.095	173
6.1	277	6.1	270	6.1	220	6.1	187	6.1	307	6.1	192	6.1	278	6.1	360	6.1	120	6.1	194	6.1	188	6.1	278	6.1	260	6.1	375	6.1	189
6.105	257	6.105	196	6.105	206	6.105	204	6.105	298	6.105	186	6.105	327	6.105	315	6.105	148	6.105	235	6.105	183	6.105	299	6.105	280	6.105	324	6.105	266
6.11	203	6.11	245	6.11	183	6.11	282	6.11	273	6.11	156	6.11	240	6.11	269	6.11	141	6.11	221	6.11	168	6.11	306	6.11	356	6.11	249	6.11	280
6.115	179	6.115	358	6.115	251	6.115	309	6.115	245	6.115	176	6.115	208	6.115	237	6.115	120	6.115	175	6.115	137	6.115	307	6.115	326	6.115	216	6.115	240
6.12	240	6.12	372	6.12	333	6.12	280	6.12	220	6.12	170	6.12	244	6.12	225	6.12	129	6.12	163	6.12	210	6.12	350	6.12	259	6.12	145	6.12	280
6.125	266	6.125	356	6.125	283	6.125	290	6.125	225	6.125	123	6.125	240	6.125	224	6.125	151	6.125	216	6.125	270	6.125	367	6.125	285	6.125	104	6.125	295
6.13	258	6.13	405	6.13	235	6.13	253	6.13	261	6.13	95	6.13	229	6.13	256	6.13	147	6.13	224	6.13	219	6.13	343	6.13	296	6.13	141	6.13	266
6.135	245	6.135	391	6.135	238	6.135	218	6.135	277	6.135	97	6.135	272	6.135	267	6.135	136	6.135	189	6.135	131	6.135	341	6.135	259	6.135	181	6.135	272
6.14	228	6.14	295	6.14	249	6.14	226	6.14	304	6.14	134	6.14	309	6.14	236	6.14	106	6.14	227	6.14	131	6.14	334	6.14	205	6.14	229	6.14	221
6.145	240	6.145	273	6.145	226	6.145	231	6.145	309	6.145	176	6.145	280	6.145	226	6.145	121	6.145	227	6.145	176	6.145	304	6.145	226	6.145	276	6.145	148
6.15	256	6.15	320	6.15	182	6.15	200	6.15	243	6.15	152	6.15	240	6.15	218	6.15	154	6.15	225	6.15	166	6.15	264	6.15	215	6.15	232	6.15	127
6.155	275	6.155	316	6.155	215	6.155	187	6.155	205	6.155	152	6.155	230	6.155	237	6.155	120	6.155	229	6.155	147	6.155	300	6.155	160	6.155	168	6.155	130
6.16	316	6.16	323	6.16	254	6.16	217	6.16	210	6.16	205	6.16	248	6.16	263	6.16	107	6.16	201	6.16	192	6.16	333	6.16	152	6.16	156	6.16	208
6.165	312	6.165	401	6.165	232	6.165	279	6.165	233	6.165	259	6.165	254	6.165	221	6.165	218	6.165	264	6.165	228	6.165	369	6.165	212	6.165	183	6.165	280
6.17	318	6.17	367	6.17	186	6.17	279	6.17	244	6.17	281	6.17	275	6.17	189	6.17	219	6.17	248	6.17	205	6.17	381	6.17	239	6.17	225	6.17	238
6.175	293	6.175	220	6.175	146	6.175	205	6.175	254	6.175	200	6.175	284	6.175	203	6.175	141	6.175	182	6.175	171	6.175	351	6.175	226	6.175	223	6.175	183
6.18	314	6.18	179	6.18	188	6.18	183	6.18	230	6.18	144	6.18	304	6.18	261	6.18	111	6.18	205	6.18	187	6.18	383	6.18	243	6.18	201	6.18	168
6.185	382	6.185	270	6.185	294	6.185	212	6.185	210	6.185	199	6.185	325	6.185	312	6.185	109	6.185	254	6.185	220	6.185	441	6.185	265	6.185	267	6.185	155
6.19	415	6.19	329	6.19	301	6.19	200	6.19	236	6.19	229	6.19	352	6.19	299	6.19	146	6.19	250	6.19	224	6.19	423	6.19	272	6.19	311	6.19	226
6.195	439	6.195	284	6.195	224	6.195	198	6.195	261	6.195	183	6.195	360	6.195	210	6.195	230	6.195	255	6.195	218	6.195	372	6.195	264	6.195	294	6.195	304
6.2	387	6.2	226	6.2	249	6.2	207	6.2	230	6.2	148	6.2	370	6.2	161	6.2	251	6.2	260	6.2	225	6.2	377	6.2	270	6.2	304	6.2	307
6.205	372	6.205	246	6.205	346	6.205	178	6.205	223	6.205	203	6.205	286	6.205	162	6.205	193	6.205	281	6.205	249	6.205	331	6.205	274	6.205	276	6.205	306
6.21	396	6.21	244	6.21	336	6.21	182	6.21	263	6.21	244	6.21	283	6.21	208	6.21	149	6.21	315	6.21	248	6.21	313	6.21	266	6.21	223	6.21	339
6.215	381	6.215	259	6.215	273	6.215	211	6.215	252	6.215	220	6.215	258	6.215	323	6.215	141	6.215	326	6.215	246	6.215	358	6.215	282	6.215	277	6.215	323
6.22	363	6.22	321	6.22	245	6.22	212	6.22	227	6.22	150	6.22	260	6.22	340	6.22	136	6.22	359	6.22	300	6.22	415	6.22	308	6.22	319	6.22	293
6.225	352	6.225	352	6.225	259	6.225	156	6.225	206	6.225	168	6.225	347	6.225	284	6.225	121	6.225	354	6.225	243	6.225	390	6.225	293	6.225	305	6.225	257
6.23	400	6.23	330	6.23	306	6.23	157	6.23	154	6.23	218	6.23	419	6.23	266	6.23	121	6.23	251	6.23	219	6.23	441	6.23	293	6.23	304	6.23	256
6.235	384	6.235	222	6.235	241	6.235	189	6.235	154	6.235	187	6.235	416	6.235	222	6.235	116	6.235	231	6.235	271	6.235	459	6.235	280	6.235	293	6.235	280
6.24	323	6.24	160	6.24	181	6.24	184	6.24	173	6.24	149	6.24	427	6.24	229	6.24	133	6.24	301	6.24	297	6.24	380	6.24	240	6.24	288	6.24	280
6.245	328	6.245	251	6.245	251	6.245	190	6.245	175	6.245	153	6.245	436	6.245	280	6.245	182	6.245	304	6.245	275	6.245	307	6.245	242	6.245	251	6.245	251
6.25	282	6.25	310	6.25	315	6.25	194	6.25	188	6.25	178	6.25	356	6.25	308	6.25	213	6.25	298	6.25	256	6.25	369	6.25	299	6.25	211	6.25	346
6.255	275	6.255	269	6.255	283	6.255	202	6.255	162	6.255	198	6.255	288	6.255	342	6.255	216	6.255	291	6.255	304	6.255	436	6.255	297	6.255	210	6.255	430
6.26	320	6.26	306	6.26	242	6.26	217	6.26	139	6.26	227	6.26	312	6.26	321	6.26	177	6.26	336	6.26	362	6.26	399	6.26	266	6.26	217	6.26	322
6.265	662	6.265	331	6.265	176	6.265	211	6.265	189	6.265	194	6.265	338	6.265	260	6.265	152	6.265	276	6.265	280	6.265	332	6.265	268	6.265	235	6.265	255
6.27	363	6.27	282	6.27	238	6.27	177	6.27	274	6.27	161	6.27	296	6.27	287	6.27	215	6.27	198	6.27	237	6.27	367	6.27	258	6.27	230	6.27	291
6.275	355	6.275	239	6.275	199	6.275	194	6.275	290	6.275	200	6.275	253	6.275	324	6.275	269	6.275	218	6.275	299	6.275	392	6.275	259	6.275	271	6.275	281
6.28	387	6.28	226	6.28	203	6.28	255	6.28	315	6.28	229	6.28	264	6.28	323	6.28	227	6.28	210	6.28	260	6.28	356	6.28	291	6.28	331	6.28	255
6.285	381	6.285	263	6.285	190	6.285	220	6.285	311	6.285	205	6.285	320	6.285	311	6.285	184	6.285	268	6.285	213	6.285	368	6.285	242	6.285	306	6.285	287
6.29	300	6.29	298	6.29	207	6.29	185	6.29	231	6.29	197	6.29	430	6.29	296	6.29	197	6.29	239	6.29	213	6.29	390	6.29	187	6.29	278	6.29	310
6.295	278	6.295	280	6.295	235	6.295	257	6.295	189	6.295	221	6.295	452	6.295	302	6.295	204	6.295	184	6.295	192	6.295	429	6.295	205	6.295	339	6.295	266
6.3	376	6.3	282	6.3	210	6.3	279	6.3	211	6.3	184	6.3	354	6.3	301	6.3	205	6.3	175	6.3	178	6.3	433	6.3	218	6.3	325	6.3	238
6.305	449	6.305	354	6.305	205	6.305	236	6.305	215	6.305	126	6.305	333	6.305	308	6.305	204	6.305	335	6.305	201	6.305	373	6.305	316	6.305	231	6.305	297
6.31	410	6.31	418	6.31	203	6.31	230	6.31	189	6.31	144	6.31	368	6.31	347	6.31	242	6.31	428	6.31	222	6.31	353	6.31	405	6.31	182	6.31	341
6.315	330	6.315	392	6.315	161	6.315	184	6.315	151	6.315	178	6.315	359	6.315	389	6.315	274	6.315	307	6.315	206	6.315	382	6.315	296	6.315	238	6.315	328
6.32	324	6.32	326	6.32	174	6.32	116	6.32	110	6.32	176	6.32	354	6.32	391	6.32	227	6.32	243	6.32	186	6.32	430	6.32	257	6.32	275	6.32	288
6.325	304	6.325	335	6.325	250	6.325	113	6.325	117	6.325	178	6.325	362	6.325	329	6.325	170	6.325	233	6.325	212	6.325	472	6.325	256	6.325	267	6.325	243
6.33	254	6.33	397	6.33	321	6.33	198	6.33	153	6.33	213	6.33	347	6.33	326	6.33	166	6.33	275	6.33	264	6.33	448	6.33	235	6.33	241	6.33	184
6.335	282	6.335	368	6.335	290	6.335	243	6.335	194	6.335	232	6.335	296	6.335	317	6.335	149	6.335	265	6.335	299	6.335	366	6.335	259	6.335	264	6.335	164
6.34	289	6.34	250	6.34	218	6.34	244	6.34	212	6.34	215	6.34	277	6.34	275	6.34	161	6.34	306	6.34	259	6.34	384	6.34	248	6.34	266	6.34	192
6.345	225	6.345	207	6.345	241	6.345	221	6.345	191	6.345	241	6.345	288	6.345	219	6.345	158	6.345	309	6.345	235	6.345	471	6.345	249	6.345	277	6.345	229
6.35	208	6.35	271	6.35	252	6.35	206	6.35	205	6.35	195	6.35	258	6.35	240	6.35	162	6.35	314	6.35	283	6.35	484	6.35	282	6.35	306	6.35	267
6.355	304	6.355	298	6.355	257	6.355	225	6.355	200	6.355	164	6.355	205	6.355	280	6.355	181	6.355	312	6.355	324	6.355	415	6.355	277	6.355	302	6.355	286
6.36	413	6.36	308	6.36	294	6.36	227	6.36	160	6.36	160	6.36	236	6.36	285	6.36	173	6.36	318	6.36	286	6.36	354	6.36	265	6.36	280	6.36	274
6.365	651	6.365	358	6.365	263	6.365	193	6.365	149	6.365	143	6.365	291	6.365	272	6.365	163	6.365	330	6.365	199	6.365	327	6.365	299	6.365	283	6.365	204
6.37	228	6.37	366	6.37	267	6.37	162	6.37	162	6.37	150	6.37	266	6.37	250	6.37	153	6.37	326	6.37	187	6.37	300	6.37	304	6.37	248	6.37	156
6.375	187	6.375	321	6.375	323	6.375	180	6.375	198	6.375	208	6.375	263	6.375	255	6.375	129	6.375	335	6.375	218	6.375	326	6.375	232	6.375	205	6.375	192
6.38	253	6.38	142	6.38	309	6.38	211	6.38	223	6.38	230	6.38	269	6.38	263	6.38	115	6.38	333	6.38	196	6.38	375	6.38	203	6.38	211	6.38	266
6.385	327	6.385	287	6.385	258	6.385	232	6.385	233	6.385	172	6.385	262	6.385	255	6.385	148	6.385	253	6.385	147	6.385	407	6.385	218	6.385	223	6.385	291
6.39	395	6.39	288	6.39	227	6.39	261	6.39	236	6.39	124	6.39	252	6.39	278	6.39	160	6.39	186	6.39	179	6.39	404	6.39	187	6.39	208	6.39	257
6.395	344	6.395	305	6.395	227	6.395	254	6.395	219	6.395	123	6.395	253	6.395	277	6.395	121	6.395	206	6.395	247	6.395	358	6.395	205	6.395	184	6.395	226
6.4	246	6.4	285	6.4	214	6.4	268	6.4	220	6.4	152	6.4	243	6.4	253	6.4	101	6.4	213	6.4	221	6.4	316	6.4	251	6.4	202	6.4	253
6.405	259	6.405	325	6.405	176	6.405	303	6.405	229	6.405	163	6.405	223	6.405	318	6.405	144	6.405	169	6.405	173	6.405	308	6.405	259	6.405	252	6.405	237
6.41	288	6.41	382	6.41	189	6.41	257	6.41	227	6.41	149	6.41	208	6.41	370	6.41	221	6.41	160	6.41	179	6.41	369	6.41	272	6.41	254	6.41	219
6.415	266	6.415	339	6.415	274	6.415	235	6.415	247	6.415	143	6.415	203	6.415	344	6.415	263	6.415	177	6.415	173	6.415	389	6.415	292	6.415	227	6.415	212
6.42	269	6.42	318	6.42	329	6.42	245	6.42	225	6.42	148	6.42	243	6.42	280	6.42	216	6.42	171	6.42	167	6.42	368	6.42	286	6.42	216	6.42	187
6.425	259	6.425	332	6.425	313	6.425	193	6.425	190	6.425	161	6.425	297	6.425	242	6.425	145	6.425	289	6.425	216	6.425	396	6.425	261	6.425	206	6.425	226
6.43	204	6.43	304	6.43	284	6.43	170	6.43	173	6.43	144	6.43	313	6.43	269	6.43	122	6.43	335	6.43	225	6.43	381	6.43	280	6.43	193	6.43	236
6.435	200	6.435	262	6.435	238	6.435	190	6.435	167	6.435	139	6.435	290	6.435	276	6.435	124	6.435	256	6.435	202	6.435	330	6.435	518	6.435	197	6.435	198
6.44	208	6.44	249	6.44	178	6.44	188	6.44	174	6.44	166	6.44	256	6.44	240	6.44	129	6.44	278	6.44	172	6.44	255	6.44	249	6.44	176	6.44	177
6.445	195	6.445	234	6.445	190	6.445	210	6.445	218	6.445	205	6.445	242	6.445	227	6.445	146	6.445	267	6.445	160	6.445	231	6.445	237	6.445	136	6.445	159
6.45	208	6.45	249	6.45	233	6.45	229	6.45	217	6.45	204	6.45	278	6.45	226	6.45	161	6.45	213	6.45	171	6.45	253	6.45	267	6.45	162	6.45	183
6.455	234	6.455	317	6.455	248	6.455	203	6.455	195	6.455	167	6.455	265	6.455	242	6.455	142	6.455	182	6.455	171	6.455	311	6.455	272	6.455	252	6.455	248
6.46	238	6.46	317	6.46	299	6.46	169	6.46	194	6.46	176	6.46	287	6.46	224	6.46	113	6.46	192	6.46	184	6.46	295	6.46	248	6.46	248	6.46	221
6.465	223	6.465	292	6.465	245	6.465	187	6.465	207	6.465	172	6.465	323	6.465	190	6.465	116	6.465	226	6.465	188	6.465	276	6.465	229	6.465	219	6.465	192
6.47	292	6.47	324	6.47	167	6.47	234	6.47	211	6.47	167	6.47	294	6.47	250	6.47	149	6.47	294	6.47	174	6.47	316	6.47	221	6.47	264	6.47	229
6.475	349	6.475	299	6.475	205	6.475	201	6.475	161	6.475	179	6.475	249	6.475	248	6.475	204	6.475	613	6.475	172	6.475	339	6.475	270	6.475	256	6.475	277
6.48	288	6.48	286	6.48	262	6.48	147	6.48	103	6.48	207	6.48	304	6.48	260	6.48	221	6.48	462	6.48	210	6.48	369	6.48	318	6.48	197	6.48	330
6.485	284	6.485	293	6.485	251	6.485	175	6.485	102	6.485	224	6.485	328	6.485	329	6.485	175	6.485	201	6.485	257	6.485	352	6.485	280	6.485	196	6.485	326
6.49	500	6.49	284	6.49	238	6.49	253	6.49	135	6.49	213	6.49	273	6.49	323	6.49	150	6.49	209	6.49	214	6.49	306	6.49	214	6.49	221	6.49	251
6.495	255	6.495	308	6.495	229	6.495	228	6.495	174	6.495	181	6.495	181	6.495	265	6.495	158	6.495	192	6.495	182	6.495	346	6.495	224	6.495	211	6.495	200
6.5	210	6.5	341	6.5	228	6.5	142	6.5	207	6.5	184	6.5	150	6.5	283	6.5	127	6.5	236	6.5	184	6.5	359	6.5	226	6.5	205	6.5	214
6.505	171	6.505	350	6.505	290	6.505	137	6.505	244	6.505	170	6.505	229	6.505	303	6.505	119	6.505	212	6.505	184	6.505	332	6.505	198	6.505	200	6.505	256
6.51	205	6.51	331	6.51	291	6.51	164	6.51	291	6.51	140	6.51	313	6.51	263	6.51	127	6.51	187	6.51	187	6.51	322	6.51	171	6.51	225	6.51	278
6.515	288	6.515	273	6.515	226	6.515	179	6.515	322	6.515	175	6.515	265	6.515	205	6.515	104	6.515	197	6.515	165	6.515	318	6.515	166	6.515	253	6.515	291
6.52	516	6.52	299	6.52	183	6.52	188	6.52	290	6.52	234	6.52	264	6.52	197	6.52	101	6.52	185	6.52	130	6.52	316	6.52	169	6.52	216	6.52	221
6.525	278	6.525	369	6.525	239	6.525	155	6.525	176	6.525	208	6.525	289	6.525	236	6.525	158	6.525	175	6.525	139	6.525	354	6.525	203	6.525	194	6.525	216
6.53	187	6.53	357	6.53	379	6.53	148	6.53	75	6.53	161	6.53	302	6.53	288	6.53	205	6.53	188	6.53	176	6.53	398	6.53	245	6.53	206	6.53	252
6.535	171	6.535	320	6.535	452	6.535	192	6.535	94	6.535	136	6.535	298	6.535	295	6.535	216	6.535	218	6.535	201	6.535	392	6.535	259	6.535	213	6.535	270
6.54	233	6.54	318	6.54	428	6.54	206	6.54	201	6.54	150	6.54	263	6.54	243	6.54	188	6.54	251	6.54	230	6.54	354	6.54	251	6.54	198	6.54	287
6.545	279	6.545	371	6.545	361	6.545	223	6.545	202	6.545	157	6.545	206	6.545	280	6.545	162	6.545	282	6.545	242	6.545	322	6.545	200	6.545	226	6.545	267
6.55	240	6.55	418	6.55	318	6.55	288	6.55	139	6.55	135	6.55	227	6.55	319	6.55	192	6.55	226	6.55	202	6.55	325	6.55	232	6.55	282	6.55	198
6.555	172	6.555	354	6.555	282	6.555	315	6.555	116	6.555	149	6.555	279	6.555	272	6.555	208	6.555	171	6.555	198	6.555	323	6.555	246	6.555	288	6.555	181
6.56	188	6.56	279	6.56	254	6.56	248	6.56	191	6.56	148	6.56	255	6.56	274	6.56	211	6.56	173	6.56	243	6.56	279	6.56	228	6.56	259	6.56	246
6.565	238	6.565	262	6.565	274	6.565	148	6.565	242	6.565	125	6.565	190	6.565	319	6.565	210	6.565	200	6.565	269	6.565	262	6.565	211	6.565	256	6.565	299
6.57	230	6.57	263	6.57	247	6.57	130	6.57	181	6.57	152	6.57	178	6.57	312	6.57	163	6.57	212	6.57	220	6.57	265	6.57	178	6.57	213	6.57	248
6.575	219	6.575	309	6.575	230	6.575	167	6.575	159	6.575	160	6.575	198	6.575	284	6.575	193	6.575	179	6.575	163	6.575	225	6.575	207	6.575	162	6.575	176
6.58	189	6.58	363	6.58	251	6.58	157	6.58	187	6.58	141	6.58	213	6.58	286	6.58	147	6.58	139	6.58	150	6.58	201	6.58	237	6.58	160	6.58	147
6.585	125	6.585	346	6.585	270	6.585	176	6.585	194	6.585	138	6.585	256	6.585	283	6.585	142	6.585	142	6.585	164	6.585	273	6.585	205	6.585	183	6.585	186
6.59	132	6.59	319	6.59	328	6.59	249	6.59	196	6.59	140	6.59	261	6.59	227	6.59	142	6.59	174	6.59	180	6.59	351	6.59	198	6.59	165	6.59	237
6.595	202	6.595	306	6.595	325	6.595	281	6.595	160	6.595	136	6.595	202	6.595	195	6.595	141	6.595	189	6.595	155	6.595	300	6.595	242	6.595	145	6.595	246
6.6	230	6.6	304	6.6	265	6.6	281	6.6	174	6.6	152	6.6	243	6.6	289	6.6	128	6.6	185	6.6	163	6.6	251	6.6	313	6.6	158	6.6	233
6.605	202	6.605	368	6.605	307	6.605	296	6.605	237	6.605	189	6.605	303	6.605	368	6.605	122	6.605	154	6.605	214	6.605	236	6.605	315	6.605	167	6.605	238
6.61	150	6.61	407	6.61	345	6.61	276	6.61	242	6.61	184	6.61	293	6.61	306	6.61	119	6.61	137	6.61	188	6.61	248	6.61	251	6.61	163	6.61	194
6.615	179	6.615	341	6.615	289	6.615	205	6.615	233	6.615	152	6.615	280	6.615	243	6.615	105	6.615	165	6.615	187	6.615	270	6.615	239	6.615	141	6.615	236
6.62	211	6.62	134	6.62	247	6.62	147	6.62	215	6.62	130	6.62	304	6.62	267	6.62	212	6.62	198	6.62	203	6.62	278	6.62	260	6.62	140	6.62	283
6.625	175	6.625	382	6.625	217	6.625	160	6.625	181	6.625	96	6.625	309	6.625	301	6.625	147	6.625	251	6.625	249	6.625	287	6.625	282	6.625	178	6.625	243
6.63	233	6.63	367	6.63	199	6.63	216	6.63	165	6.63	97	6.63	291	6.63	281	6.63	166	6.63	285	6.63	275	6.63	294	6.63	210	6.63	208	6.63	221
6.635	297	6.635	293	6.635	216	6.635	235	6.635	179	6.635	128	6.635	275	6.635	261	6.635	171	6.635	261	6.635	291	6.635	259	6.635	169	6.635	203	6.635	275
6.64	279	6.64	290	6.64	274	6.64	196	6.64	188	6.64	168	6.64	309	6.64	241	6.64	158	6.64	208	6.64	318	6.64	234	6.64	232	6.64	216	6.64	297
6.645	273	6.645	357	6.645	316	6.645	156	6.645	197	6.645	199	6.645	325	6.645	221	6.645	127	6.645	178	6.645	368	6.645	269	6.645	262	6.645	239	6.645	312
6.65	244	6.65	388	6.65	282	6.65	168	6.65	198	6.65	176	6.65	298	6.65	205	6.65	136	6.65	195	6.65	373	6.65	253	6.65	200	6.65	232	6.65	342
6.655	243	6.655	330	6.655	309	6.655	186	6.655	192	6.655	133	6.655	291	6.655	235	6.655	148	6.655	220	6.655	277	6.655	251	6.655	177	6.655	223	6.655	288
6.66	248	6.66	344	6.66	352	6.66	200	6.66	235	6.66	130	6.66	369	6.66	267	6.66	129	6.66	229	6.66	206	6.66	318	6.66	227	6.66	250	6.66	233
6.665	226	6.665	397	6.665	335	6.665	151	6.665	264	6.665	149	6.665	333	6.665	240	6.665	123	6.665	200	6.665	203	6.665	314	6.665	264	6.665	234	6.665	249
6.67	173	6.67	354	6.67	339	6.67	122	6.67	230	6.67	120	6.67	275	6.67	256	6.67	118	6.67	224	6.67	172	6.67	321	6.67	226	6.67	176	6.67	298
6.675	197	6.675	315	6.675	288	6.675	122	6.675	203	6.675	114	6.675	317	6.675	279	6.675	113	6.675	218	6.675	147	6.675	391	6.675	157	6.675	203	6.675	304
6.68	275	6.68	329	6.68	221	6.68	87	6.68	234	6.68	133	6.68	355	6.68	268	6.68	133	6.68	171	6.68	133	6.68	382	6.68	141	6.68	254	6.68	304
6.685	292	6.685	322	6.685	260	6.685	73	6.685	252	6.685	190	6.685	286	6.685	216	6.685	131	6.685	236	6.685	171	6.685	312	6.685	214	6.685	267	6.685	343
6.69	213	6.69	129	6.69	288	6.69	98	6.69	235	6.69	218	6.69	220	6.69	184	6.69	152	6.69	251	6.69	269	6.69	337	6.69	260	6.69	220	6.69	309
6.695	168	6.695	118	6.695	214	6.695	156	6.695	221	6.695	230	6.695	257	6.695	184	6.695	160	6.695	264	6.695	288	6.695	378	6.695	225	6.695	164	6.695	284
6.7	203	6.7	247	6.7	146	6.7	192	6.7	255	6.7	210	6.7	323	6.7	161	6.7	139	6.7	241	6.7	222	6.7	337	6.7	190	6.7	196	6.7	336
6.705	219	6.705	212	6.705	162	6.705	180	6.705	279	6.705	199	6.705	318	6.705	156	6.705	176	6.705	246	6.705	189	6.705	306	6.705	195	6.705	234	6.705	317
6.71	210	6.71	216	6.71	239	6.71	179	6.71	228	6.71	164	6.71	310	6.71	229	6.71	185	6.71	243	6.71	180	6.71	298	6.71	224	6.71	230	6.71	240
6.715	197	6.715	287	6.715	273	6.715	179	6.715	171	6.715	125	6.715	364	6.715	255	6.715	123	6.715	214	6.715	171	6.715	321	6.715	271	6.715	193	6.715	239
6.72	170	6.72	286	6.72	330	6.72	186	6.72	150	6.72	141	6.72	389	6.72	254	6.72	132	6.72	192	6.72	190	6.72	343	6.72	301	6.72	202	6.72	292
6.725	198	6.725	213	6.725	349	6.725	210	6.725	137	6.725	136	6.725	299	6.725	214	6.725	168	6.725	160	6.725	225	6.725	339	6.725	277	6.725	222	6.725	278
6.73	275	6.73	182	6.73	302	6.73	191	6.73	183	6.73	145	6.73	286	6.73	218	6.73	150	6.73	147	6.73	259	6.73	317	6.73	253	6.73	227	6.73	287
6.735	309	6.735	202	6.735	320	6.735	173	6.735	287	6.735	184	6.735	325	6.735	276	6.735	127	6.735	152	6.735	258	6.735	293	6.735	245	6.735	214	6.735	322
6.74	264	6.74	251	6.74	325	6.74	199	6.74	310	6.74	231	6.74	318	6.74	269	6.74	126	6.74	159	6.74	205	6.74	274	6.74	264	6.74	207	6.74	315
6.745	203	6.745	305	6.745	287	6.745	207	6.745	265	6.745	216	6.745	361	6.745	246	6.745	152	6.745	205	6.745	221	6.745	282	6.745	229	6.745	210	6.745	280
6.75	196	6.75	292	6.75	269	6.75	202	6.75	250	6.75	140	6.75	344	6.75	256	6.75	163	6.75	183	6.75	262	6.75	339	6.75	203	6.75	211	6.75	227
6.755	213	6.755	255	6.755	276	6.755	214	6.755	223	6.755	109	6.755	300	6.755	294	6.755	151	6.755	197	6.755	229	6.755	404	6.755	216	6.755	209	6.755	240
6.76	206	6.76	261	6.76	303	6.76	193	6.76	204	6.76	109	6.76	300	6.76	325	6.76	147	6.76	320	6.76	204	6.76	398	6.76	261	6.76	214	6.76	330
6.765	195	6.765	305	6.765	332	6.765	166	6.765	194	6.765	110	6.765	334	6.765	291	6.765	119	6.765	514	6.765	266	6.765	332	6.765	274	6.765	224	6.765	347
6.77	160	6.77	321	6.77	316	6.77	197	6.77	161	6.77	139	6.77	328	6.77	268	6.77	103	6.77	517	6.77	304	6.77	308	6.77	218	6.77	175	6.77	312
6.775	152	6.775	294	6.775	256	6.775	219	6.775	196	6.775	176	6.775	298	6.775	281	6.775	95	6.775	219	6.775	288	6.775	324	6.775	206	6.775	162	6.775	274
6.78	173	6.78	270	6.78	241	6.78	217	6.78	235	6.78	205	6.78	274	6.78	291	6.78	91	6.78	190	6.78	225	6.78	294	6.78	210	6.78	234	6.78	273
6.785	234	6.785	245	6.785	224	6.785	243	6.785	194	6.785	216	6.785	295	6.785	287	6.785	103	6.785	175	6.785	178	6.785	295	6.785	224	6.785	215	6.785	282
6.79	305	6.79	240	6.79	217	6.79	237	6.79	148	6.79	186	6.79	306	6.79	270	6.79	113	6.79	147	6.79	182	6.79	301	6.79	261	6.79	162	6.79	223
6.795	324	6.795	286	6.795	269	6.795	209	6.795	152	6.795	184	6.795	323	6.795	258	6.795	129	6.795	178	6.795	181	6.795	313	6.795	292	6.795	148	6.795	154
6.8	302	6.8	276	6.8	271	6.8	238	6.8	185	6.8	187	6.8	294	6.8	230	6.8	144	6.8	255	6.8	206	6.8	331	6.8	235	6.8	189	6.8	147
6.805	294	6.805	76	6.805	281	6.805	262	6.805	163	6.805	211	6.805	223	6.805	226	6.805	154	6.805	230	6.805	195	6.805	276	6.805	213	6.805	236	6.805	221
6.81	385	6.81	85	6.81	340	6.81	231	6.81	170	6.81	240	6.81	231	6.81	232	6.81	187	6.81	176	6.81	165	6.81	301	6.81	225	6.81	215	6.81	237
6.815	468	6.815	136	6.815	311	6.815	175	6.815	236	6.815	218	6.815	214	6.815	250	6.815	215	6.815	167	6.815	134	6.815	439	6.815	230	6.815	180	6.815	197
6.82	427	6.82	310	6.82	271	6.82	158	6.82	232	6.82	182	6.82	204	6.82	277	6.82	187	6.82	198	6.82	126	6.82	428	6.82	205	6.82	156	6.82	195
6.825	372	6.825	320	6.825	257	6.825	173	6.825	185	6.825	176	6.825	223	6.825	250	6.825	181	6.825	230	6.825	139	6.825	350	6.825	209	6.825	166	6.825	205
6.83	312	6.83	332	6.83	234	6.83	166	6.83	173	6.83	160	6.83	304	6.83	189	6.83	197	6.83	349	6.83	158	6.83	325	6.83	250	6.83	222	6.83	200
6.835	258	6.835	299	6.835	251	6.835	139	6.835	215	6.835	141	6.835	321	6.835	178	6.835	189	6.835	183	6.835	177	6.835	347	6.835	272	6.835	237	6.835	226
6.84	220	6.84	259	6.84	314	6.84	149	6.84	215	6.84	153	6.84	292	6.84	238	6.84	158	6.84	161	6.84	188	6.84	384	6.84	312	6.84	213	6.84	205
6.845	211	6.845	293	6.845	283	6.845	238	6.845	140	6.845	156	6.845	315	6.845	275	6.845	145	6.845	187	6.845	187	6.845	384	6.845	331	6.845	178	6.845	165
6.85	296	6.85	347	6.85	183	6.85	293	6.85	79	6.85	151	6.85	291	6.85	267	6.85	158	6.85	253	6.85	174	6.85	327	6.85	288	6.85	210	6.85	197
6.855	323	6.855	336	6.855	199	6.855	264	6.855	84	6.855	147	6.855	198	6.855	285	6.855	173	6.855	306	6.855	200	6.855	280	6.855	244	6.855	266	6.855	217
6.86	231	6.86	316	6.86	254	6.86	259	6.86	165	6.86	130	6.86	227	6.86	262	6.86	177	6.86	285	6.86	219	6.86	279	6.86	208	6.86	272	6.86	176
6.865	192	6.865	377	6.865	242	6.865	253	6.865	269	6.865	102	6.865	256	6.865	246	6.865	154	6.865	206	6.865	246	6.865	300	6.865	195	6.865	227	6.865	195
6.87	222	6.87	387	6.87	244	6.87	212	6.87	331	6.87	133	6.87	245	6.87	302	6.87	113	6.87	160	6.87	249	6.87	308	6.87	218	6.87	173	6.87	266
6.875	200	6.875	316	6.875	241	6.875	182	6.875	317	6.875	216	6.875	273	6.875	304	6.875	91	6.875	175	6.875	174	6.875	291	6.875	237	6.875	145	6.875	312
6.88	211	6.88	291	6.88	232	6.88	163	6.88	248	6.88	271	6.88	322	6.88	226	6.88	107	6.88	191	6.88	117	6.88	292	6.88	234	6.88	168	6.88	301
6.885	247	6.885	251	6.885	235	6.885	145	6.885	235	6.885	283	6.885	324	6.885	186	6.885	138	6.885	205	6.885	167	6.885	274	6.885	244	6.885	175	6.885	266
6.89	251	6.89	235	6.89	237	6.89	128	6.89	247	6.89	237	6.89	362	6.89	187	6.89	152	6.89	242	6.89	200	6.89	261	6.89	203	6.89	148	6.89	239
6.895	243	6.895	271	6.895	233	6.895	143	6.895	212	6.895	145	6.895	370	6.895	179	6.895	118	6.895	262	6.895	196	6.895	295	6.895	200	6.895	160	6.895	262
6.9	213	6.9	257	6.9	208	6.9	176	6.9	172	6.9	123	6.9	335	6.9	174	6.9	87	6.9	242	6.9	203	6.9	297	6.9	258	6.9	194	6.9	320
6.905	158	6.905	206	6.905	228	6.905	200	6.905	149	6.905	167	6.905	284	6.905	217	6.905	103	6.905	236	6.905	178	6.905	276	6.905	221	6.905	200	6.905	254
6.91	208	6.91	188	6.91	331	6.91	218	6.91	173	6.91	192	6.91	276	6.91	259	6.91	127	6.91	531	6.91	143	6.91	254	6.91	216	6.91	216	6.91	189
6.915	266	6.915	230	6.915	345	6.915	219	6.915	176	6.915	167	6.915	235	6.915	280	6.915	155	6.915	426	6.915	161	6.915	281	6.915	277	6.915	250	6.915	183
6.92	262	6.92	300	6.92	247	6.92	206	6.92	183	6.92	123	6.92	227	6.92	243	6.92	176	6.92	254	6.92	195	6.92	354	6.92	291	6.92	227	6.92	224
6.925	272	6.925	343	6.925	182	6.925	199	6.925	230	6.925	140	6.925	240	6.925	184	6.925	178	6.925	252	6.925	183	6.925	311	6.925	252	6.925	209	6.925	279
6.93	235	6.93	314	6.93	177	6.93	128	6.93	271	6.93	137	6.93	305	6.93	213	6.93	181	6.93	216	6.93	160	6.93	321	6.93	248	6.93	224	6.93	301
6.935	213	6.935	298	6.935	190	6.935	200	6.935	287	6.935	123	6.935	304	6.935	224	6.935	154	6.935	228	6.935	174	6.935	415	6.935	280	6.935	221	6.935	327
6.94	253	6.94	288	6.94	242	6.94	227	6.94	302	6.94	136	6.94	268	6.94	216	6.94	102	6.94	302	6.94	165	6.94	361	6.94	272	6.94	169	6.94	351
6.945	272	6.945	267	6.945	307	6.945	220	6.945	327	6.945	163	6.945	312	6.945	214	6.945	102	6.945	328	6.945	117	6.945	326	6.945	240	6.945	171	6.945	306
6.95	254	6.95	281	6.95	281	6.95	163	6.95	287	6.95	177	6.95	376	6.95	221	6.95	150	6.95	331	6.95	100	6.95	372	6.95	246	6.95	227	6.95	248
6.955	261	6.955	290	6.955	247	6.955	135	6.955	190	6.955	154	6.955	359	6.955	267	6.955	176	6.955	331	6.955	142	6.955	322	6.955	291	6.955	238	6.955	251
6.96	271	6.96	278	6.96	265	6.96	178	6.96	164	6.96	131	6.96	311	6.96	286	6.96	141	6.96	330	6.96	165	6.96	271	6.96	331	6.96	193	6.96	257
6.965	265	6.965	198	6.965	265	6.965	256	6.965	222	6.965	165	6.965	294	6.965	229	6.965	151	6.965	296	6.965	173	6.965	308	6.965	317	6.965	144	6.965	285
6.97	304	6.97	76	6.97	161	6.97	262	6.97	301	6.97	192	6.97	328	6.97	183	6.97	207	6.97	248	6.97	213	6.97	337	6.97	244	6.97	145	6.97	382
6.975	288	6.975	81	6.975	165	6.975	229	6.975	307	6.975	172	6.975	404	6.975	192	6.975	204	6.975	251	6.975	232	6.975	320	6.975	218	6.975	217	6.975	465
6.98	156	6.98	367	6.98	320	6.98	245	6.98	301	6.98	152	6.98	466	6.98	248	6.98	154	6.98	269	6.98	214	6.98	313	6.98	239	6.98	245	6.98	462
6.985	138	6.985	405	6.985	248	6.985	284	6.985	306	6.985	159	6.985	459	6.985	326	6.985	137	6.985	272	6.985	181	6.985	294	6.985	240	6.985	229	6.985	400
6.99	208	6.99	303	6.99	231	6.99	272	6.99	275	6.99	171	6.99	410	6.99	322	6.99	144	6.99	226	6.99	207	6.99	311	6.99	239	6.99	202	6.99	349
6.995	183	6.995	223	6.995	244	6.995	180	6.995	227	6.995	177	6.995	370	6.995	258	6.995	137	6.995	151	6.995	246	6.995	295	6.995	227	6.995	179	6.995	275
7	133	7	225	7	288	7	103	7	199	7	181	7	384	7	185	7	140	7	175	7	240	7	246	7	224	7	214	7	258
7.005	144	7.005	260	7.005	291	7.005	84	7.005	192	7.005	217	7.005	380	7.005	183	7.005	168	7.005	208	7.005	167	7.005	280	7.005	219	7.005	266	7.005	266
7.01	194	7.01	243	7.01	240	7.01	120	7.01	190	7.01	232	7.01	352	7.01	253	7.01	202	7.01	213	7.01	152	7.01	343	7.01	229	7.01	221	7.01	377
7.015	198	7.015	206	7.015	250	7.015	196	7.015	211	7.015	209	7.015	370	7.015	325	7.015	159	7.015	200	7.015	171	7.015	363	7.015	256	7.015	170	7.015	418
7.02	203	7.02	251	7.02	293	7.02	197	7.02	241	7.02	219	7.02	366	7.02	310	7.02	111	7.02	170	7.02	206	7.02	331	7.02	270	7.02	196	7.02	336
7.025	265	7.025	294	7.025	270	7.025	140	7.025	200	7.025	221	7.025	371	7.025	285	7.025	120	7.025	163	7.025	251	7.025	365	7.025	285	7.025	225	7.025	297
7.03	287	7.03	274	7.03	235	7.03	114	7.03	181	7.03	181	7.03	365	7.03	316	7.03	141	7.03	208	7.03	256	7.03	368	7.03	280	7.03	212	7.03	274
7.035	266	7.035	260	7.035	273	7.035	136	7.035	214	7.035	155	7.035	324	7.035	288	7.035	116	7.035	260	7.035	219	7.035	363	7.035	272	7.035	207	7.035	327
7.04	283	7.04	260	7.04	257	7.04	170	7.04	227	7.04	161	7.04	304	7.04	238	7.04	92	7.04	264	7.04	194	7.04	415	7.04	288	7.04	203	7.04	425
7.045	286	7.045	245	7.045	221	7.045	134	7.045	231	7.045	176	7.045	311	7.045	242	7.045	118	7.045	202	7.045	208	7.045	648	7.045	307	7.045	216	7.045	347
7.05	306	7.05	251	7.05	294	7.05	116	7.05	268	7.05	171	7.05	322	7.05	259	7.05	139	7.05	170	7.05	196	7.05	642	7.05	308	7.05	250	7.05	328
7.055	342	7.055	188	7.055	356	7.055	142	7.055	259	7.055	154	7.055	317	7.055	277	7.055	133	7.055	179	7.055	208	7.055	347	7.055	301	7.055	222	7.055	283
7.06	272	7.06	271	7.06	342	7.06	112	7.06	163	7.06	141	7.06	307	7.06	297	7.06	92	7.06	168	7.06	275	7.06	386	7.06	309	7.06	171	7.06	357
7.065	149	7.065	248	7.065	263	7.065	113	7.065	127	7.065	144	7.065	395	7.065	288	7.065	47	7.065	184	7.065	366	7.065	395	7.065	302	7.065	187	7.065	504
7.07	174	7.07	210	7.07	239	7.07	154	7.07	144	7.07	168	7.07	595	7.07	298	7.07	114	7.07	221	7.07	388	7.07	381	7.07	336	7.07	206	7.07	622
7.075	211	7.075	79	7.075	285	7.075	173	7.075	148	7.075	163	7.075	786	7.075	333	7.075	202	7.075	221	7.075	330	7.075	385	7.075	347	7.075	168	7.075	776
7.08	205	7.08	116	7.08	329	7.08	204	7.08	208	7.08	120	7.08	960	7.08	408	7.08	211	7.08	194	7.08	307	7.08	399	7.08	333	7.08	181	7.08	943
7.085	250	7.085	189	7.085	396	7.085	223	7.085	248	7.085	104	7.085	1167	7.085	450	7.085	216	7.085	213	7.085	357	7.085	408	7.085	601	7.085	253	7.085	1038
7.09	248	7.09	386	7.09	371	7.09	176	7.09	194	7.09	116	7.09	1352	7.09	479	7.09	202	7.09	242	7.09	368	7.09	397	7.09	634	7.09	258	7.09	1100
7.095	243	7.095	403	7.095	267	7.095	166	7.095	193	7.095	114	7.095	1338	7.095	456	7.095	142	7.095	255	7.095	430	7.095	419	7.095	670	7.095	306	7.095	1114
7.1	253	7.1	360	7.1	226	7.1	229	7.1	212	7.1	132	7.1	1227	7.1	419	7.1	129	7.1	213	7.1	531	7.1	449	7.1	725	7.1	283	7.1	1419
7.105	234	7.105	337	7.105	242	7.105	225	7.105	201	7.105	194	7.105	1170	7.105	407	7.105	165	7.105	204	7.105	554	7.105	434	7.105	702	7.105	254	7.105	1130
7.11	200	7.11	347	7.11	278	7.11	172	7.11	190	7.11	256	7.11	1160	7.11	479	7.11	175	7.11	261	7.11	472	7.11	399	7.11	622	7.11	256	7.11	1131
7.115	208	7.115	327	7.115	322	7.115	169	7.115	212	7.115	216	7.115	1165	7.115	504	7.115	163	7.115	221	7.115	461	7.115	357	7.115	536	7.115	222	7.115	1040
7.12	539	7.12	317	7.12	333	7.12	199	7.12	225	7.12	157	7.12	1164	7.12	489	7.12	149	7.12	175	7.12	502	7.12	349	7.12	545	7.12	227	7.12	964
7.125	343	7.125	343	7.125	301	7.125	223	7.125	207	7.125	186	7.125	1157	7.125	467	7.125	102	7.125	420	7.125	464	7.125	406	7.125	568	7.125	256	7.125	976
7.13	314	7.13	344	7.13	208	7.13	242	7.13	178	7.13	261	7.13	1054	7.13	466	7.13	128	7.13	296	7.13	442	7.13	396	7.13	552	7.13	268	7.13	954
7.135	276	7.135	347	7.135	148	7.135	221	7.135	135	7.135	436	7.135	947	7.135	457	7.135	187	7.135	305	7.135	448	7.135	357	7.135	454	7.135	254	7.135	964
7.14	341	7.14	377	7.14	128	7.14	204	7.14	153	7.14	382	7.14	985	7.14	474	7.14	153	7.14	464	7.14	417	7.14	394	7.14	432	7.14	214	7.14	1009
7.145	582	7.145	363	7.145	162	7.145	243	7.145	224	7.145	372	7.145	1019	7.145	452	7.145	156	7.145	468	7.145	379	7.145	393	7.145	472	7.145	199	7.145	948
7.15	639	7.15	337	7.15	239	7.15	272	7.15	221	7.15	364	7.15	923	7.15	405	7.15	219	7.15	686	7.15	352	7.15	333	7.15	472	7.15	210	7.15	848
7.155	646	7.155	340	7.155	257	7.155	226	7.155	149	7.155	634	7.155	864	7.155	383	7.155	248	7.155	514	7.155	334	7.155	351	7.155	397	7.155	216	7.155	821
7.16	635	7.16	222	7.16	217	7.16	206	7.16	115	7.16	717	7.16	859	7.16	333	7.16	228	7.16	701	7.16	340	7.16	423	7.16	356	7.16	256	7.16	864
7.165	469	7.165	256	7.165	149	7.165	232	7.165	159	7.165	579	7.165	833	7.165	305	7.165	161	7.165	866	7.165	391	7.165	472	7.165	396	7.165	275	7.165	923
7.17	412	7.17	269	7.17	197	7.17	213	7.17	204	7.17	531	7.17	803	7.17	326	7.17	136	7.17	926	7.17	412	7.17	414	7.17	411	7.17	262	7.17	896
7.175	591	7.175	309	7.175	323	7.175	196	7.175	201	7.175	503	7.175	846	7.175	370	7.175	180	7.175	910	7.175	414	7.175	364	7.175	381	7.175	307	7.175	773
7.18	491	7.18	171	7.18	314	7.18	209	7.18	171	7.18	530	7.18	897	7.18	647	7.18	171	7.18	1077	7.18	446	7.18	379	7.18	373	7.18	357	7.18	666
7.185	464	7.185	361	7.185	245	7.185	199	7.185	125	7.185	558	7.185	800	7.185	400	7.185	144	7.185	1075	7.185	445	7.185	377	7.185	420	7.185	341	7.185	736
7.19	457	7.19	296	7.19	231	7.19	166	7.19	116	7.19	472	7.19	770	7.19	420	7.19	216	7.19	1035	7.19	393	7.19	409	7.19	513	7.19	309	7.19	811
7.195	467	7.195	194	7.195	253	7.195	198	7.195	142	7.195	408	7.195	802	7.195	392	7.195	304	7.195	654	7.195	343	7.195	446	7.195	544	7.195	227	7.195	754
7.2	384	7.2	227	7.2	275	7.2	268	7.2	200	7.2	434	7.2	714	7.2	327	7.2	296	7.2	626	7.2	272	7.2	374	7.2	446	7.2	168	7.2	658
7.205	323	7.205	342	7.205	289	7.205	260	7.205	251	7.205	433	7.205	589	7.205	293	7.205	232	7.205	805	7.205	219	7.205	336	7.205	330	7.205	211	7.205	577
7.21	370	7.21	404	7.21	319	7.21	206	7.21	321	7.21	388	7.21	584	7.21	306	7.21	232	7.21	790	7.21	224	7.21	370	7.21	303	7.21	232	7.21	530
7.215	424	7.215	396	7.215	316	7.215	185	7.215	326	7.215	298	7.215	557	7.215	328	7.215	272	7.215	686	7.215	229	7.215	352	7.215	294	7.215	224	7.215	493
7.22	432	7.22	186	7.22	282	7.22	213	7.22	233	7.22	300	7.22	441	7.22	299	7.22	267	7.22	688	7.22	270	7.22	326	7.22	342	7.22	262	7.22	443
7.225	377	7.225	297	7.225	261	7.225	217	7.225	151	7.225	341	7.225	341	7.225	286	7.225	255	7.225	678	7.225	350	7.225	320	7.225	307	7.225	315	7.225	381
7.23	350	7.23	284	7.23	304	7.23	179	7.23	136	7.23	314	7.23	335	7.23	288	7.23	242	7.23	580	7.23	293	7.23	341	7.23	238	7.23	336	7.23	645
7.235	342	7.235	314	7.235	333	7.235	186	7.235	163	7.235	272	7.235	370	7.235	265	7.235	204	7.235	496	7.235	229	7.235	348	7.235	276	7.235	256	7.235	702
7.24	335	7.24	333	7.24	326	7.24	232	7.24	203	7.24	248	7.24	369	7.24	256	7.24	171	7.24	464	7.24	226	7.24	340	7.24	343	7.24	192	7.24	408
7.245	312	7.245	315	7.245	360	7.245	273	7.245	192	7.245	222	7.245	342	7.245	285	7.245	198	7.245	368	7.245	201	7.245	334	7.245	344	7.245	200	7.245	418
7.25	242	7.25	274	7.25	416	7.25	326	7.25	150	7.25	251	7.25	439	7.25	324	7.25	245	7.25	283	7.25	208	7.25	349	7.25	291	7.25	200	7.25	480
7.255	299	7.255	262	7.255	374	7.255	312	7.255	157	7.255	305	7.255	528	7.255	315	7.255	283	7.255	339	7.255	245	7.255	400	7.255	251	7.255	216	7.255	440
7.26	283	7.26	146	7.26	301	7.26	215	7.26	162	7.26	264	7.26	499	7.26	280	7.26	259	7.26	399	7.26	272	7.26	418	7.26	218	7.26	223	7.26	411
7.265	249	7.265	152	7.265	322	7.265	193	7.265	119	7.265	205	7.265	496	7.265	267	7.265	203	7.265	391	7.265	248	7.265	362	7.265	186	7.265	216	7.265	456
7.27	269	7.27	302	7.27	374	7.27	258	7.27	117	7.27	281	7.27	461	7.27	262	7.27	165	7.27	335	7.27	212	7.27	349	7.27	230	7.27	216	7.27	432
7.275	288	7.275	311	7.275	320	7.275	251	7.275	210	7.275	232	7.275	471	7.275	248	7.275	174	7.275	321	7.275	240	7.275	363	7.275	361	7.275	202	7.275	376
7.28	319	7.28	303	7.28	248	7.28	214	7.28	283	7.28	200	7.28	562	7.28	267	7.28	205	7.28	325	7.28	252	7.28	310	7.28	482	7.28	224	7.28	432
7.285	306	7.285	331	7.285	276	7.285	263	7.285	276	7.285	144	7.285	636	7.285	589	7.285	230	7.285	270	7.285	237	7.285	270	7.285	512	7.285	238	7.285	502
7.29	253	7.29	332	7.29	351	7.29	257	7.29	273	7.29	177	7.29	626	7.29	294	7.29	244	7.29	207	7.29	269	7.29	346	7.29	460	7.29	210	7.29	522
7.295	274	7.295	325	7.295	368	7.295	212	7.295	306	7.295	190	7.295	597	7.295	327	7.295	234	7.295	200	7.295	230	7.295	456	7.295	405	7.295	208	7.295	507
7.3	274	7.3	416	7.3	332	7.3	179	7.3	270	7.3	290	7.3	662	7.3	321	7.3	245	7.3	196	7.3	208	7.3	482	7.3	398	7.3	189	7.3	525
7.305	198	7.305	445	7.305	284	7.305	182	7.305	172	7.305	295	7.305	632	7.305	299	7.305	236	7.305	209	7.305	277	7.305	417	7.305	389	7.305	216	7.305	590
7.31	216	7.31	326	7.31	290	7.31	228	7.31	114	7.31	312	7.31	550	7.31	342	7.31	222	7.31	383	7.31	312	7.31	384	7.31	346	7.31	296	7.31	593
7.315	293	7.315	235	7.315	317	7.315	220	7.315	97	7.315	385	7.315	549	7.315	608	7.315	301	7.315	371	7.315	310	7.315	404	7.315	361	7.315	316	7.315	483
7.32	285	7.32	253	7.32	304	7.32	217	7.32	118	7.32	276	7.32	575	7.32	402	7.32	277	7.32	218	7.32	325	7.32	385	7.32	377	7.32	281	7.32	432
7.325	240	7.325	197	7.325	284	7.325	250	7.325	154	7.325	193	7.325	612	7.325	378	7.325	162	7.325	190	7.325	352	7.325	369	7.325	297	7.325	496	7.325	452
7.33	552	7.33	243	7.33	247	7.33	252	7.33	169	7.33	133	7.33	672	7.33	314	7.33	197	7.33	197	7.33	329	7.33	383	7.33	280	7.33	417	7.33	483
7.335	387	7.335	224	7.335	234	7.335	214	7.335	200	7.335	125	7.335	739	7.335	508	7.335	238	7.335	463	7.335	288	7.335	408	7.335	316	7.335	156	7.335	528
7.34	432	7.34	209	7.34	237	7.34	201	7.34	213	7.34	134	7.34	755	7.34	256	7.34	227	7.34	411	7.34	278	7.34	391	7.34	389	7.34	210	7.34	533
7.345	416	7.345	355	7.345	205	7.345	209	7.345	180	7.345	159	7.345	660	7.345	305	7.345	185	7.345	187	7.345	284	7.345	321	7.345	441	7.345	251	7.345	510
7.35	653	7.35	420	7.35	224	7.35	212	7.35	197	7.35	155	7.35	744	7.35	370	7.35	196	7.35	288	7.35	272	7.35	299	7.35	400	7.35	227	7.35	527
7.355	348	7.355	456	7.355	259	7.355	204	7.355	236	7.355	150	7.355	770	7.355	385	7.355	183	7.355	329	7.355	253	7.355	355	7.355	354	7.355	208	7.355	506
7.36	341	7.36	375	7.36	274	7.36	194	7.36	219	7.36	156	7.36	642	7.36	607	7.36	172	7.36	323	7.36	256	7.36	354	7.36	342	7.36	170	7.36	448
7.365	352	7.365	154	7.365	251	7.365	224	7.365	133	7.365	142	7.365	624	7.365	608	7.365	150	7.365	334	7.365	244	7.365	333	7.365	296	7.365	152	7.365	521
7.37	303	7.37	356	7.37	235	7.37	259	7.37	77	7.37	128	7.37	535	7.37	312	7.37	200	7.37	277	7.37	275	7.37	362	7.37	250	7.37	170	7.37	545
7.375	244	7.375	371	7.375	223	7.375	224	7.375	130	7.375	175	7.375	422	7.375	303	7.375	238	7.375	469	7.375	272	7.375	375	7.375	313	7.375	170	7.375	473
7.38	322	7.38	474	7.38	208	7.38	183	7.38	156	7.38	219	7.38	396	7.38	299	7.38	189	7.38	272	7.38	178	7.38	383	7.38	358	7.38	209	7.38	395
7.385	645	7.385	517	7.385	241	7.385	209	7.385	164	7.385	242	7.385	426	7.385	295	7.385	154	7.385	597	7.385	153	7.385	431	7.385	334	7.385	261	7.385	299
7.39	619	7.39	411	7.39	276	7.39	241	7.39	171	7.39	267	7.39	392	7.39	264	7.39	147	7.39	498	7.39	173	7.39	409	7.39	346	7.39	253	7.39	264
7.395	608	7.395	330	7.395	280	7.395	231	7.395	129	7.395	258	7.395	445	7.395	253	7.395	148	7.395	417	7.395	198	7.395	345	7.395	301	7.395	194	7.395	320
7.4	326	7.4	292	7.4	289	7.4	231	7.4	151	7.4	194	7.4	490	7.4	277	7.4	166	7.4	271	7.4	227	7.4	325	7.4	251	7.4	135	7.4	363
7.405	333	7.405	256	7.405	307	7.405	229	7.405	223	7.405	141	7.405	402	7.405	295	7.405	176	7.405	237	7.405	223	7.405	287	7.405	328	7.405	135	7.405	346
7.41	291	7.41	208	7.41	292	7.41	242	7.41	205	7.41	278	7.41	321	7.41	288	7.41	165	7.41	192	7.41	202	7.41	305	7.41	359	7.41	154	7.41	349
7.415	302	7.415	248	7.415	255	7.415	243	7.415	139	7.415	180	7.415	357	7.415	288	7.415	168	7.415	243	7.415	198	7.415	385	7.415	237	7.415	317	7.415	338
7.42	401	7.42	331	7.42	269	7.42	194	7.42	181	7.42	276	7.42	417	7.42	324	7.42	180	7.42	271	7.42	217	7.42	378	7.42	168	7.42	160	7.42	320
7.425	420	7.425	247	7.425	272	7.425	152	7.425	258	7.425	247	7.425	445	7.425	323	7.425	148	7.425	536	7.425	237	7.425	339	7.425	210	7.425	184	7.425	269
7.43	313	7.43	264	7.43	281	7.43	147	7.43	243	7.43	174	7.43	456	7.43	282	7.43	125	7.43	243	7.43	267	7.43	317	7.43	272	7.43	237	7.43	328
7.435	278	7.435	260	7.435	292	7.435	182	7.435	196	7.435	163	7.435	441	7.435	285	7.435	141	7.435	199	7.435	305	7.435	350	7.435	277	7.435	229	7.435	410
7.44	293	7.44	185	7.44	234	7.44	244	7.44	189	7.44	178	7.44	404	7.44	323	7.44	133	7.44	176	7.44	292	7.44	377	7.44	267	7.44	181	7.44	385
7.445	265	7.445	207	7.445	292	7.445	254	7.445	183	7.445	180	7.445	366	7.445	325	7.445	152	7.445	215	7.445	218	7.445	350	7.445	288	7.445	195	7.445	338
7.45	289	7.45	290	7.45	367	7.45	183	7.45	147	7.45	155	7.45	372	7.45	280	7.45	176	7.45	283	7.45	221	7.45	335	7.45	301	7.45	219	7.45	403
7.455	339	7.455	296	7.455	305	7.455	138	7.455	124	7.455	161	7.455	411	7.455	256	7.455	152	7.455	274	7.455	283	7.455	344	7.455	297	7.455	210	7.455	461
7.46	332	7.46	275	7.46	263	7.46	169	7.46	191	7.46	208	7.46	401	7.46	290	7.46	127	7.46	420	7.46	281	7.46	335	7.46	300	7.46	211	7.46	398
7.465	346	7.465	318	7.465	227	7.465	190	7.465	219	7.465	221	7.465	392	7.465	338	7.465	108	7.465	253	7.465	230	7.465	373	7.465	261	7.465	227	7.465	375
7.47	392	7.47	382	7.47	207	7.47	175	7.47	210	7.47	197	7.47	440	7.47	343	7.47	92	7.47	311	7.47	273	7.47	422	7.47	240	7.47	226	7.47	372
7.475	452	7.475	365	7.475	242	7.475	182	7.475	206	7.475	182	7.475	442	7.475	277	7.475	141	7.475	347	7.475	390	7.475	426	7.475	240	7.475	196	7.475	326
7.48	459	7.48	284	7.48	236	7.48	205	7.48	239	7.48	173	7.48	407	7.48	255	7.48	254	7.48	384	7.48	396	7.48	367	7.48	246	7.48	222	7.48	301
7.485	379	7.485	268	7.485	187	7.485	189	7.485	274	7.485	184	7.485	392	7.485	283	7.485	302	7.485	389	7.485	352	7.485	395	7.485	336	7.485	256	7.485	336
7.49	333	7.49	332	7.49	183	7.49	146	7.49	242	7.49	200	7.49	432	7.49	263	7.49	234	7.49	346	7.49	370	7.49	420	7.49	392	7.49	285	7.49	429
7.495	325	7.495	126	7.495	104	7.495	157	7.495	204	7.495	208	7.495	549	7.495	323	7.495	227	7.495	349	7.495	397	7.495	418	7.495	467	7.495	325	7.495	456
7.5	285	7.5	324	7.5	131	7.5	209	7.5	169	7.5	187	7.5	621	7.5	378	7.5	253	7.5	363	7.5	397	7.5	457	7.5	512	7.5	375	7.5	440
7.505	253	7.505	400	7.505	310	7.505	192	7.505	158	7.505	147	7.505	621	7.505	380	7.505	243	7.505	317	7.505	336	7.505	630	7.505	472	7.505	379	7.505	525
7.51	221	7.51	430	7.51	330	7.51	149	7.51	175	7.51	192	7.51	691	7.51	394	7.51	244	7.51	283	7.51	304	7.51	653	7.51	457	7.51	325	7.51	536
7.515	253	7.515	342	7.515	316	7.515	174	7.515	187	7.515	212	7.515	707	7.515	429	7.515	265	7.515	312	7.515	320	7.515	465	7.515	491	7.515	314	7.515	506
7.52	282	7.52	229	7.52	327	7.52	237	7.52	217	7.52	211	7.52	668	7.52	398	7.52	309	7.52	325	7.52	328	7.52	366	7.52	499	7.52	363	7.52	569
7.525	296	7.525	141	7.525	323	7.525	259	7.525	205	7.525	175	7.525	637	7.525	342	7.525	270	7.525	307	7.525	340	7.525	390	7.525	499	7.525	365	7.525	600
7.53	278	7.53	166	7.53	282	7.53	223	7.53	160	7.53	167	7.53	520	7.53	309	7.53	177	7.53	282	7.53	363	7.53	390	7.53	507	7.53	333	7.53	488
7.535	222	7.535	155	7.535	293	7.535	232	7.535	159	7.535	196	7.535	530	7.535	298	7.535	168	7.535	250	7.535	376	7.535	393	7.535	544	7.535	323	7.535	457
7.54	216	7.54	321	7.54	350	7.54	253	7.54	211	7.54	147	7.54	682	7.54	296	7.54	202	7.54	220	7.54	352	7.54	420	7.54	555	7.54	303	7.54	510
7.545	283	7.545	306	7.545	319	7.545	251	7.545	272	7.545	91	7.545	696	7.545	318	7.545	213	7.545	234	7.545	352	7.545	461	7.545	515	7.545	280	7.545	512
7.55	309	7.55	293	7.55	228	7.55	235	7.55	244	7.55	76	7.55	591	7.55	320	7.55	212	7.55	291	7.55	384	7.55	470	7.55	449	7.55	265	7.55	492
7.555	325	7.555	275	7.555	199	7.555	172	7.555	188	7.555	134	7.555	503	7.555	334	7.555	184	7.555	325	7.555	391	7.555	453	7.555	449	7.555	278	7.555	475
7.56	915	7.56	213	7.56	199	7.56	163	7.56	174	7.56	149	7.56	482	7.56	337	7.56	188	7.56	302	7.56	387	7.56	422	7.56	517	7.56	270	7.56	496
7.565	956	7.565	168	7.565	235	7.565	244	7.565	162	7.565	174	7.565	505	7.565	314	7.565	214	7.565	237	7.565	331	7.565	362	7.565	512	7.565	231	7.565	512
7.57	700	7.57	180	7.57	303	7.57	277	7.57	160	7.57	211	7.57	493	7.57	285	7.57	178	7.57	208	7.57	243	7.57	344	7.57	416	7.57	210	7.57	493
7.575	1606	7.575	104	7.575	283	7.575	263	7.575	227	7.575	219	7.575	501	7.575	285	7.575	151	7.575	237	7.575	237	7.575	338	7.575	331	7.575	243	7.575	444
7.58	4572	7.58	310	7.58	281	7.58	204	7.58	298	7.58	320	7.58	505	7.58	300	7.58	177	7.58	297	7.58	236	7.58	357	7.58	311	7.58	255	7.58	376
7.585	12136	7.585	328	7.585	302	7.585	119	7.585	279	7.585	778	7.585	521	7.585	350	7.585	206	7.585	417	7.585	263	7.585	415	7.585	344	7.585	266	7.585	403
7.59	27876	7.59	250	7.59	261	7.59	98	7.59	247	7.59	2121	7.59	485	7.59	328	7.59	192	7.59	829	7.59	312	7.59	395	7.59	445	7.59	272	7.59	483
7.595	55183	7.595	297	7.595	230	7.595	143	7.595	271	7.595	5371	7.595	420	7.595	288	7.595	200	7.595	2414	7.595	312	7.595	370	7.595	495	7.595	275	7.595	416
7.6	93882	7.6	320	7.6	182	7.6	190	7.6	255	7.6	11460	7.6	357	7.6	315	7.6	227	7.6	6567	7.6	263	7.6	400	7.6	433	7.6	261	7.6	310
7.605	139107	7.605	267	7.605	160	7.605	176	7.605	239	7.605	21273	7.605	367	7.605	317	7.605	248	7.605	14646	7.605	247	7.605	487	7.605	395	7.605	296	7.605	290
7.61	182359	7.61	299	7.61	202	7.61	121	7.61	300	7.61	34186	7.61	363	7.61	241	7.61	272	7.61	27704	7.61	219	7.61	778	7.61	401	7.61	328	7.61	316
7.615	215514	7.615	286	7.615	244	7.615	77	7.615	310	7.615	47265	7.615	360	7.615	222	7.615	305	7.615	45725	7.615	232	7.615	1444	7.615	355	7.615	344	7.615	312
7.62	238192	7.62	275	7.62	243	7.62	113	7.62	256	7.62	58507	7.62	379	7.62	326	7.62	349	7.62	66519	7.62	327	7.62	3259	7.62	283	7.62	466	7.62	348
7.625	252154	7.625	352	7.625	199	7.625	187	7.625	231	7.625	65917	7.625	478	7.625	541	7.625	422	7.625	84916	7.625	540	7.625	7062	7.625	238	7.625	845	7.625	424
7.63	250636	7.63	365	7.63	220	7.63	182	7.63	254	7.63	69285	7.63	655	7.63	970	7.63	421	7.63	97220	7.63	768	7.63	13210	7.63	241	7.63	1671	7.63	407
7.635	232698	7.635	315	7.635	311	7.635	185	7.635	309	7.635	69459	7.635	984	7.635	1672	7.635	385	7.635	103617	7.635	949	7.635	21016	7.635	307	7.635	3007	7.635	306
7.64	210011	7.64	351	7.64	320	7.64	197	7.64	386	7.64	65272	7.64	1388	7.64	2411	7.64	318	7.64	101994	7.64	1226	7.64	28506	7.64	384	7.64	4522	7.64	344
7.645	186319	7.645	377	7.645	269	7.645	190	7.645	440	7.645	58594	7.645	1697	7.645	3117	7.645	224	7.645	93443	7.645	1745	7.645	34628	7.645	406	7.645	5695	7.645	399
7.65	160780	7.65	325	7.65	231	7.65	251	7.65	474	7.65	52824	7.65	1919	7.65	3700	7.65	211	7.65	84285	7.65	1944	7.65	39599	7.65	441	7.65	6512	7.65	418
7.655	140885	7.655	338	7.655	248	7.655	250	7.655	449	7.655	47702	7.655	1995	7.655	3892	7.655	288	7.655	75467	7.655	1828	7.655	42157	7.655	528	7.655	6944	7.655	432
7.66	128510	7.66	174	7.66	272	7.66	221	7.66	342	7.66	41967	7.66	2024	7.66	3796	7.66	379	7.66	66013	7.66	1789	7.66	41063	7.66	477	7.66	6889	7.66	502
7.665	115443	7.665	141	7.665	268	7.665	257	7.665	246	7.665	36975	7.665	2151	7.665	3680	7.665	384	7.665	57396	7.665	1764	7.665	36988	7.665	456	7.665	6577	7.665	527
7.67	101058	7.67	278	7.67	270	7.67	257	7.67	269	7.67	32969	7.67	2170	7.67	3470	7.67	330	7.67	50051	7.67	1698	7.67	32562	7.67	515	7.67	5996	7.67	600
7.675	88637	7.675	315	7.675	299	7.675	223	7.675	317	7.675	29306	7.675	1923	7.675	3118	7.675	344	7.675	43570	7.675	1606	7.675	29354	7.675	558	7.675	5214	7.675	616
7.68	77030	7.68	321	7.68	319	7.68	218	7.68	288	7.68	26499	7.68	1706	7.68	2725	7.68	308	7.68	37349	7.68	1454	7.68	26249	7.68	560	7.68	4420	7.68	613
7.685	67899	7.685	328	7.685	286	7.685	217	7.685	278	7.685	23221	7.685	1608	7.685	2387	7.685	280	7.685	31797	7.685	1332	7.685	22899	7.685	543	7.685	3894	7.685	680
7.69	59573	7.69	322	7.69	233	7.69	213	7.69	229	7.69	21158	7.69	1550	7.69	2151	7.69	283	7.69	27826	7.69	1240	7.69	19669	7.69	605	7.69	3682	7.69	747
7.695	48710	7.695	330	7.695	189	7.695	173	7.695	163	7.695	17929	7.695	1518	7.695	1963	7.695	298	7.695	25027	7.695	1085	7.695	16843	7.695	668	7.695	3242	7.695	828
7.7	36360	7.7	390	7.7	195	7.7	232	7.7	172	7.7	13469	7.7	1419	7.7	1739	7.7	309	7.7	22485	7.7	1051	7.7	14781	7.7	594	7.7	2845	7.7	821
7.705	23365	7.705	432	7.705	259	7.705	243	7.705	211	7.705	10470	7.705	1312	7.705	1526	7.705	304	7.705	19360	7.705	1117	7.705	13011	7.705	570	7.705	2727	7.705	698
7.71	12566	7.71	376	7.71	313	7.71	165	7.71	284	7.71	7331	7.71	1161	7.71	1459	7.71	311	7.71	15395	7.71	1141	7.71	11155	7.71	589	7.71	2448	7.71	690
7.715	6365	7.715	280	7.715	361	7.715	176	7.715	359	7.715	4411	7.715	1096	7.715	1369	7.715	285	7.715	10563	7.715	1320	7.715	9601	7.715	503	7.715	2064	7.715	668
7.72	3311	7.72	299	7.72	360	7.72	251	7.72	310	7.72	2356	7.72	1118	7.72	1200	7.72	288	7.72	5892	7.72	1435	7.72	8580	7.72	456	7.72	1850	7.72	689
7.725	1931	7.725	370	7.725	288	7.725	286	7.725	204	7.725	1034	7.725	1022	7.725	1108	7.725	274	7.725	2864	7.725	1301	7.725	7389	7.725	416	7.725	1778	7.725	686
7.73	1868	7.73	223	7.73	241	7.73	242	7.73	208	7.73	514	7.73	882	7.73	1060	7.73	229	7.73	1381	7.73	1122	7.73	5732	7.73	392	7.73	1609	7.73	576
7.735	1864	7.735	219	7.735	196	7.735	188	7.735	221	7.735	403	7.735	908	7.735	883	7.735	197	7.735	1065	7.735	987	7.735	3968	7.735	382	7.735	1260	7.735	527
7.74	1922	7.74	307	7.74	163	7.74	181	7.74	186	7.74	428	7.74	752	7.74	616	7.74	160	7.74	564	7.74	934	7.74	2479	7.74	384	7.74	996	7.74	524
7.745	1434	7.745	261	7.745	200	7.745	190	7.745	166	7.745	437	7.745	606	7.745	435	7.745	164	7.745	568	7.745	871	7.745	1480	7.745	407	7.745	843	7.745	477
7.75	1332	7.75	250	7.75	281	7.75	214	7.75	156	7.75	405	7.75	527	7.75	336	7.75	260	7.75	475	7.75	776	7.75	857	7.75	325	7.75	619	7.75	414
7.755	1271	7.755	164	7.755	295	7.755	256	7.755	129	7.755	413	7.755	555	7.755	285	7.755	290	7.755	376	7.755	699	7.755	661	7.755	298	7.755	493	7.755	438
7.76	1203	7.76	272	7.76	263	7.76	247	7.76	180	7.76	399	7.76	560	7.76	267	7.76	241	7.76	344	7.76	634	7.76	615	7.76	283	7.76	445	7.76	476
7.765	1137	7.765	240	7.765	277	7.765	203	7.765	230	7.765	368	7.765	517	7.765	307	7.765	221	7.765	368	7.765	527	7.765	573	7.765	289	7.765	464	7.765	444
7.77	1033	7.77	268	7.77	268	7.77	193	7.77	201	7.77	400	7.77	531	7.77	371	7.77	327	7.77	732	7.77	482	7.77	538	7.77	333	7.77	510	7.77	403
7.775	883	7.775	295	7.775	252	7.775	234	7.775	233	7.775	416	7.775	487	7.775	357	7.775	219	7.775	942	7.775	496	7.775	495	7.775	338	7.775	465	7.775	377
7.78	786	7.78	277	7.78	285	7.78	248	7.78	244	7.78	407	7.78	387	7.78	315	7.78	307	7.78	659	7.78	439	7.78	520	7.78	323	7.78	417	7.78	370
7.785	695	7.785	302	7.785	271	7.785	232	7.785	188	7.785	416	7.785	368	7.785	323	7.785	311	7.785	942	7.785	393	7.785	660	7.785	487	7.785	384	7.785	352
7.79	717	7.79	345	7.79	228	7.79	164	7.79	164	7.79	440	7.79	369	7.79	321	7.79	284	7.79	883	7.79	450	7.79	746	7.79	355	7.79	347	7.79	351
7.795	853	7.795	322	7.795	136	7.795	130	7.795	168	7.795	394	7.795	362	7.795	293	7.795	249	7.795	940	7.795	515	7.795	718	7.795	382	7.795	313	7.795	351
7.8	834	7.8	275	7.8	320	7.8	201	7.8	167	7.8	360	7.8	326	7.8	264	7.8	237	7.8	905	7.8	511	7.8	659	7.8	397	7.8	311	7.8	389
7.805	715	7.805	264	7.805	314	7.805	195	7.805	155	7.805	409	7.805	283	7.805	261	7.805	253	7.805	1411	7.805	419	7.805	947	7.805	438	7.805	359	7.805	421
7.81	720	7.81	285	7.81	309	7.81	157	7.81	131	7.81	427	7.81	317	7.81	343	7.81	257	7.81	1489	7.81	341	7.81	670	7.81	517	7.81	414	7.81	415
7.815	764	7.815	277	7.815	290	7.815	157	7.815	94	7.815	365	7.815	325	7.815	378	7.815	239	7.815	919	7.815	338	7.815	656	7.815	525	7.815	440	7.815	397
7.82	813	7.82	230	7.82	256	7.82	206	7.82	112	7.82	309	7.82	311	7.82	274	7.82	225	7.82	868	7.82	387	7.82	705	7.82	591	7.82	386	7.82	379
7.825	926	7.825	279	7.825	243	7.825	255	7.825	195	7.825	349	7.825	350	7.825	266	7.825	299	7.825	822	7.825	437	7.825	694	7.825	495	7.825	382	7.825	400
7.83	950	7.83	325	7.83	273	7.83	274	7.83	271	7.83	437	7.83	356	7.83	338	7.83	404	7.83	836	7.83	417	7.83	646	7.83	494	7.83	402	7.83	438
7.835	1005	7.835	111	7.835	310	7.835	227	7.835	317	7.835	461	7.835	315	7.835	360	7.835	418	7.835	873	7.835	383	7.835	636	7.835	471	7.835	405	7.835	417
7.84	1172	7.84	227	7.84	289	7.84	217	7.84	318	7.84	429	7.84	287	7.84	352	7.84	406	7.84	922	7.84	407	7.84	628	7.84	526	7.84	411	7.84	397
7.845	1280	7.845	350	7.845	231	7.845	246	7.845	237	7.845	448	7.845	296	7.845	370	7.845	423	7.845	1052	7.845	512	7.845	654	7.845	568	7.845	415	7.845	434
7.85	1229	7.85	338	7.85	222	7.85	238	7.85	152	7.85	520	7.85	314	7.85	397	7.85	395	7.85	1400	7.85	565	7.85	701	7.85	576	7.85	505	7.85	415
7.855	1091	7.855	277	7.855	270	7.855	216	7.855	175	7.855	595	7.855	322	7.855	379	7.855	382	7.855	1001	7.855	550	7.855	725	7.855	687	7.855	576	7.855	457
7.86	1121	7.86	304	7.86	312	7.86	196	7.86	201	7.86	642	7.86	430	7.86	357	7.86	464	7.86	1107	7.86	539	7.86	801	7.86	739	7.86	581	7.86	576
7.865	1207	7.865	322	7.865	289	7.865	193	7.865	175	7.865	603	7.865	582	7.865	395	7.865	554	7.865	1255	7.865	608	7.865	939	7.865	689	7.865	684	7.865	611
7.87	1214	7.87	322	7.87	226	7.87	245	7.87	184	7.87	530	7.87	822	7.87	515	7.87	480	7.87	1196	7.87	654	7.87	975	7.87	742	7.87	823	7.87	714
7.875	1285	7.875	197	7.875	184	7.875	241	7.875	203	7.875	515	7.875	857	7.875	637	7.875	440	7.875	1330	7.875	665	7.875	923	7.875	842	7.875	795	7.875	863
7.88	1530	7.88	380	7.88	232	7.88	174	7.88	223	7.88	519	7.88	775	7.88	708	7.88	396	7.88	1410	7.88	807	7.88	890	7.88	800	7.88	713	7.88	1032
7.885	1347	7.885	317	7.885	304	7.885	185	7.885	282	7.885	665	7.885	832	7.885	675	7.885	382	7.885	1243	7.885	815	7.885	921	7.885	666	7.885	720	7.885	883
7.89	1699	7.89	260	7.89	312	7.89	245	7.89	286	7.89	649	7.89	840	7.89	599	7.89	499	7.89	973	7.89	592	7.89	924	7.89	634	7.89	877	7.89	936
7.895	2136	7.895	271	7.895	316	7.895	205	7.895	213	7.895	867	7.895	840	7.895	547	7.895	456	7.895	988	7.895	576	7.895	841	7.895	659	7.895	844	7.895	841
7.9	2756	7.9	263	7.9	317	7.9	210	7.9	145	7.9	1235	7.9	838	7.9	547	7.9	376	7.9	978	7.9	565	7.9	793	7.9	616	7.9	696	7.9	742
7.905	3650	7.905	254	7.905	304	7.905	260	7.905	133	7.905	1634	7.905	805	7.905	554	7.905	346	7.905	1074	7.905	570	7.905	790	7.905	650	7.905	781	7.905	925
7.91	4500	7.91	135	7.91	289	7.91	241	7.91	151	7.91	1847	7.91	749	7.91	542	7.91	317	7.91	1413	7.91	589	7.91	751	7.91	736	7.91	751	7.91	728
7.915	4915	7.915	239	7.915	263	7.915	192	7.915	166	7.915	2075	7.915	706	7.915	555	7.915	291	7.915	1838	7.915	553	7.915	762	7.915	725	7.915	649	7.915	742
7.92	5185	7.92	300	7.92	173	7.92	163	7.92	158	7.92	2283	7.92	738	7.92	512	7.92	300	7.92	2333	7.92	581	7.92	830	7.92	643	7.92	591	7.92	728
7.925	5268	7.925	368	7.925	230	7.925	187	7.925	185	7.925	2220	7.925	765	7.925	618	7.925	267	7.925	2804	7.925	714	7.925	953	7.925	777	7.925	736	7.925	751
7.93	5085	7.93	277	7.93	246	7.93	227	7.93	243	7.93	2123	7.93	766	7.93	666	7.93	281	7.93	2853	7.93	886	7.93	1186	7.93	894	7.93	598	7.93	829
7.935	4727	7.935	91	7.935	276	7.935	210	7.935	194	7.935	2149	7.935	784	7.935	478	7.935	389	7.935	2750	7.935	1032	7.935	1613	7.935	715	7.935	653	7.935	866
7.94	4115	7.94	241	7.94	245	7.94	200	7.94	178	7.94	1923	7.94	790	7.94	532	7.94	381	7.94	2765	7.94	1148	7.94	2087	7.94	660	7.94	703	7.94	853
7.945	3439	7.945	283	7.945	205	7.945	263	7.945	213	7.945	1551	7.945	845	7.945	611	7.945	307	7.945	2570	7.945	1331	7.945	2430	7.945	698	7.945	689	7.945	902
7.95	2799	7.95	251	7.95	222	7.95	280	7.95	214	7.95	1474	7.95	880	7.95	607	7.95	276	7.95	2390	7.95	1456	7.95	2499	7.95	722	7.95	693	7.95	1013
7.955	2234	7.955	161	7.955	255	7.955	195	7.955	236	7.955	1469	7.955	835	7.955	633	7.955	295	7.955	2304	7.955	1488	7.955	2364	7.955	669	7.955	811	7.955	932
7.96	2000	7.96	235	7.96	231	7.96	161	7.96	241	7.96	1322	7.96	864	7.96	517	7.96	357	7.96	2016	7.96	1523	7.96	2262	7.96	737	7.96	861	7.96	797
7.965	1951	7.965	260	7.965	165	7.965	189	7.965	249	7.965	1209	7.965	880	7.965	424	7.965	490	7.965	1900	7.965	1555	7.965	2081	7.965	844	7.965	796	7.965	827
7.97	1907	7.97	319	7.97	215	7.97	211	7.97	211	7.97	1104	7.97	805	7.97	424	7.97	522	7.97	1886	7.97	1482	7.97	1964	7.97	905	7.97	730	7.97	907
7.975	1836	7.975	163	7.975	336	7.975	259	7.975	178	7.975	992	7.975	758	7.975	480	7.975	472	7.975	1966	7.975	1458	7.975	1933	7.975	986	7.975	674	7.975	976
7.98	1708	7.98	207	7.98	366	7.98	305	7.98	205	7.98	946	7.98	1852	7.98	485	7.98	413	7.98	2229	7.98	1523	7.98	1680	7.98	1088	7.98	658	7.98	1069
7.985	1544	7.985	406	7.985	263	7.985	299	7.985	228	7.985	786	7.985	676	7.985	393	7.985	392	7.985	1765	7.985	1576	7.985	1502	7.985	1159	7.985	596	7.985	1122
7.99	1334	7.99	339	7.99	215	7.99	308	7.99	252	7.99	677	7.99	649	7.99	342	7.99	347	7.99	1551	7.99	1533	7.99	1346	7.99	1230	7.99	582	7.99	1034
7.995	1037	7.995	289	7.995	277	7.995	301	7.995	237	7.995	605	7.995	571	7.995	363	7.995	345	7.995	1311	7.995	1391	7.995	1259	7.995	1199	7.995	561	7.995	995
8	721	8	303	8	270	8	259	8	185	8	395	8	525	8	369	8	379	8	1015	8	1232	8	1266	8	984	8	544	8	1013
8.005	1014	8.005	277	8.005	123	8.005	288	8.005	163	8.005	301	8.005	532	8.005	309	8.005	398	8.005	790	8.005	1112	8.005	1064	8.005	807	8.005	608	8.005	906
8.01	1017	8.01	268	8.01	264	8.01	295	8.01	149	8.01	307	8.01	501	8.01	317	8.01	444	8.01	733	8.01	834	8.01	853	8.01	731	8.01	629	8.01	784
8.015	723	8.015	293	8.015	301	8.015	253	8.015	157	8.015	343	8.015	444	8.015	301	8.015	450	8.015	687	8.015	700	8.015	800	8.015	669	8.015	513	8.015	748
8.02	672	8.02	91	8.02	337	8.02	262	8.02	260	8.02	526	8.02	403	8.02	304	8.02	390	8.02	873	8.02	701	8.02	743	8.02	619	8.02	466	8.02	794
8.025	758	8.025	118	8.025	279	8.025	249	8.025	335	8.025	808	8.025	327	8.025	282	8.025	405	8.025	1520	8.025	708	8.025	670	8.025	582	8.025	444	8.025	811
8.03	1048	8.03	124	8.03	127	8.03	210	8.03	285	8.03	1093	8.03	299	8.03	316	8.03	611	8.03	2503	8.03	765	8.03	606	8.03	551	8.03	368	8.03	703
8.035	1317	8.035	138	8.035	313	8.035	246	8.035	310	8.035	1451	8.035	366	8.035	339	8.035	1064	8.035	3703	8.035	827	8.035	560	8.035	601	8.035	450	8.035	669
8.04	1259	8.04	356	8.04	326	8.04	296	8.04	408	8.04	1915	8.04	408	8.04	282	8.04	1871	8.04	4712	8.04	1168	8.04	622	8.04	819	8.04	656	8.04	899
8.045	1181	8.045	442	8.045	259	8.045	225	8.045	502	8.045	2038	8.045	479	8.045	282	8.045	3060	8.045	6301	8.045	1896	8.045	851	8.045	1141	8.045	911	8.045	1543
8.05	1138	8.05	400	8.05	200	8.05	146	8.05	576	8.05	2050	8.05	627	8.05	390	8.05	4432	8.05	6264	8.05	2830	8.05	1231	8.05	1579	8.05	1330	8.05	2783
8.055	1022	8.055	357	8.055	199	8.055	164	8.055	460	8.055	2080	8.055	671	8.055	490	8.055	5509	8.055	5121	8.055	3837	8.055	1580	8.055	2224	8.055	1771	8.055	4147
8.06	1032	8.06	142	8.06	232	8.06	206	8.06	435	8.06	1899	8.06	620	8.06	544	8.06	5872	8.06	4808	8.06	4760	8.06	1796	8.06	2793	8.06	2172	8.06	5328
8.065	1088	8.065	196	8.065	224	8.065	221	8.065	414	8.065	1633	8.065	613	8.065	582	8.065	5827	8.065	4299	8.065	5064	8.065	1848	8.065	3075	8.065	2493	8.065	6433
8.07	986	8.07	209	8.07	259	8.07	244	8.07	393	8.07	1418	8.07	657	8.07	597	8.07	5379	8.07	3843	8.07	4810	8.07	1867	8.07	3238	8.07	2427	8.07	7081
8.075	780	8.075	311	8.075	327	8.075	212	8.075	404	8.075	1256	8.075	699	8.075	558	8.075	4631	8.075	3277	8.075	4241	8.075	1863	8.075	3142	8.075	2225	8.075	7118
8.08	714	8.08	368	8.08	325	8.08	168	8.08	384	8.08	1130	8.08	725	8.08	574	8.08	4055	8.08	2699	8.08	3723	8.08	1642	8.08	2804	8.08	2050	8.08	6543
8.085	850	8.085	215	8.085	333	8.085	200	8.085	317	8.085	1038	8.085	728	8.085	620	8.085	3412	8.085	2046	8.085	3462	8.085	1480	8.085	2445	8.085	1836	8.085	5495
8.09	915	8.09	223	8.09	343	8.09	256	8.09	270	8.09	1008	8.09	736	8.09	563	8.09	2706	8.09	1667	8.09	2974	8.09	1401	8.09	2080	8.09	1738	8.09	4570
8.095	835	8.095	306	8.095	326	8.095	290	8.095	292	8.095	888	8.095	648	8.095	534	8.095	2267	8.095	1734	8.095	2390	8.095	1274	8.095	1897	8.095	1698	8.095	4098
8.1	667	8.1	332	8.1	302	8.1	254	8.1	322	8.1	738	8.1	596	8.1	475	8.1	2004	8.1	1640	8.1	2085	8.1	1122	8.1	1786	8.1	1468	8.1	3747
8.105	566	8.105	367	8.105	258	8.105	248	8.105	278	8.105	550	8.105	586	8.105	405	8.105	1672	8.105	1238	8.105	1808	8.105	974	8.105	1553	8.105	1273	8.105	3288
8.11	651	8.11	379	8.11	246	8.11	263	8.11	209	8.11	426	8.11	629	8.11	408	8.11	1362	8.11	843	8.11	1572	8.11	1017	8.11	1304	8.11	1150	8.11	2781
8.115	757	8.115	329	8.115	237	8.115	205	8.115	166	8.115	341	8.115	654	8.115	472	8.115	1037	8.115	605	8.115	1462	8.115	1129	8.115	1112	8.115	1020	8.115	2328
8.12	693	8.12	287	8.12	199	8.12	220	8.12	173	8.12	330	8.12	634	8.12	506	8.12	697	8.12	477	8.12	1282	8.12	1042	8.12	894	8.12	920	8.12	1893
8.125	620	8.125	178	8.125	216	8.125	308	8.125	260	8.125	334	8.125	597	8.125	456	8.125	531	8.125	483	8.125	1024	8.125	903	8.125	787	8.125	841	8.125	1459
8.13	557	8.13	331	8.13	233	8.13	293	8.13	293	8.13	350	8.13	546	8.13	408	8.13	408	8.13	488	8.13	735	8.13	846	8.13	744	8.13	779	8.13	1147
8.135	424	8.135	322	8.135	258	8.135	254	8.135	245	8.135	362	8.135	570	8.135	440	8.135	267	8.135	552	8.135	535	8.135	775	8.135	771	8.135	730	8.135	833
8.14	503	8.14	271	8.14	153	8.14	296	8.14	227	8.14	306	8.14	601	8.14	560	8.14	201	8.14	527	8.14	403	8.14	677	8.14	712	8.14	657	8.14	650
8.145	649	8.145	285	8.145	213	8.145	313	8.145	228	8.145	260	8.145	622	8.145	552	8.145	205	8.145	459	8.145	390	8.145	595	8.145	659	8.145	616	8.145	618
8.15	814	8.15	165	8.15	279	8.15	300	8.15	195	8.15	286	8.15	547	8.15	462	8.15	197	8.15	450	8.15	425	8.15	587	8.15	624	8.15	557	8.15	581
8.155	1004	8.155	178	8.155	366	8.155	147	8.155	162	8.155	368	8.155	525	8.155	400	8.155	198	8.155	512	8.155	390	8.155	572	8.155	518	8.155	496	8.155	523
8.16	1259	8.16	242	8.16	305	8.16	267	8.16	162	8.16	486	8.16	533	8.16	353	8.16	232	8.16	716	8.16	338	8.16	520	8.16	464	8.16	484	8.16	536
8.165	1338	8.165	376	8.165	233	8.165	214	8.165	169	8.165	650	8.165	563	8.165	330	8.165	228	8.165	981	8.165	350	8.165	551	8.165	499	8.165	440	8.165	472
8.17	1253	8.17	306	8.17	210	8.17	216	8.17	157	8.17	706	8.17	555	8.17	369	8.17	280	8.17	1118	8.17	342	8.17	706	8.17	471	8.17	400	8.17	434
8.175	1171	8.175	357	8.175	184	8.175	216	8.175	213	8.175	765	8.175	466	8.175	465	8.175	306	8.175	1267	8.175	339	8.175	778	8.175	486	8.175	414	8.175	472
8.18	1084	8.18	253	8.18	210	8.18	186	8.18	290	8.18	870	8.18	469	8.18	447	8.18	245	8.18	1435	8.18	398	8.18	895	8.18	518	8.18	406	8.18	504
8.185	1156	8.185	335	8.185	262	8.185	154	8.185	286	8.185	847	8.185	539	8.185	395	8.185	233	8.185	1379	8.185	387	8.185	1130	8.185	490	8.185	415	8.185	592
8.19	1155	8.19	303	8.19	282	8.19	123	8.19	211	8.19	819	8.19	541	8.19	343	8.19	314	8.19	1272	8.19	380	8.19	1206	8.19	454	8.19	516	8.19	693
8.195	1005	8.195	146	8.195	274	8.195	119	8.195	222	8.195	786	8.195	538	8.195	381	8.195	403	8.195	1219	8.195	375	8.195	1171	8.195	473	8.195	531	8.195	680
8.2	797	8.2	155	8.2	254	8.2	205	8.2	288	8.2	805	8.2	555	8.2	422	8.2	457	8.2	1499	8.2	402	8.2	1249	8.2	526	8.2	581	8.2	653
8.205	672	8.205	171	8.205	289	8.205	272	8.205	262	8.205	917	8.205	560	8.205	365	8.205	586	8.205	1788	8.205	410	8.205	1455	8.205	584	8.205	565	8.205	674
8.21	967	8.21	340	8.21	317	8.21	222	8.21	258	8.21	877	8.21	507	8.21	333	8.21	720	8.21	1186	8.21	428	8.21	1506	8.21	609	8.21	512	8.21	688
8.215	688	8.215	283	8.215	311	8.215	188	8.215	283	8.215	737	8.215	503	8.215	397	8.215	816	8.215	1077	8.215	544	8.215	1506	8.215	619	8.215	578	8.215	782
8.22	674	8.22	295	8.22	338	8.22	220	8.22	246	8.22	635	8.22	507	8.22	458	8.22	718	8.22	1024	8.22	670	8.22	1556	8.22	723	8.22	701	8.22	866
8.225	608	8.225	326	8.225	315	8.225	217	8.225	268	8.225	551	8.225	417	8.225	456	8.225	645	8.225	1192	8.225	670	8.225	1582	8.225	787	8.225	720	8.225	857
8.23	448	8.23	152	8.23	291	8.23	186	8.23	337	8.23	419	8.23	381	8.23	397	8.23	571	8.23	833	8.23	766	8.23	1560	8.23	752	8.23	701	8.23	958
8.235	406	8.235	165	8.235	325	8.235	164	8.235	310	8.235	338	8.235	470	8.235	400	8.235	483	8.235	685	8.235	803	8.235	1476	8.235	759	8.235	752	8.235	1035
8.24	493	8.24	374	8.24	287	8.24	149	8.24	227	8.24	341	8.24	538	8.24	437	8.24	376	8.24	603	8.24	773	8.24	1354	8.24	705	8.24	729	8.24	936
8.245	541	8.245	350	8.245	276	8.245	163	8.245	196	8.245	362	8.245	527	8.245	453	8.245	384	8.245	505	8.245	686	8.245	1108	8.245	590	8.245	691	8.245	819
8.25	512	8.25	352	8.25	283	8.25	226	8.25	210	8.25	397	8.25	486	8.25	439	8.25	422	8.25	441	8.25	601	8.25	1014	8.25	548	8.25	646	8.25	840
8.255	439	8.255	372	8.255	243	8.255	263	8.255	202	8.255	349	8.255	454	8.255	440	8.255	350	8.255	439	8.255	552	8.255	1059	8.255	562	8.255	663	8.255	888
8.26	403	8.26	354	8.26	294	8.26	264	8.26	187	8.26	278	8.26	520	8.26	427	8.26	267	8.26	491	8.26	563	8.26	1044	8.26	600	8.26	616	8.26	835
8.265	414	8.265	332	8.265	361	8.265	218	8.265	183	8.265	319	8.265	516	8.265	421	8.265	304	8.265	508	8.265	568	8.265	982	8.265	658	8.265	644	8.265	764
8.27	416	8.27	316	8.27	325	8.27	176	8.27	200	8.27	341	8.27	480	8.27	770	8.27	389	8.27	442	8.27	552	8.27	929	8.27	635	8.27	664	8.27	748
8.275	459	8.275	352	8.275	296	8.275	184	8.275	203	8.275	248	8.275	488	8.275	391	8.275	408	8.275	443	8.275	579	8.275	945	8.275	590	8.275	584	8.275	715
8.28	459	8.28	404	8.28	302	8.28	181	8.28	173	8.28	192	8.28	574	8.28	901	8.28	374	8.28	509	8.28	563	8.28	922	8.28	617	8.28	630	8.28	678
8.285	322	8.285	232	8.285	284	8.285	133	8.285	196	8.285	200	8.285	510	8.285	862	8.285	323	8.285	471	8.285	854	8.285	806	8.285	541	8.285	669	8.285	656
8.29	296	8.29	357	8.29	293	8.29	136	8.29	232	8.29	248	8.29	474	8.29	416	8.29	252	8.29	610	8.29	554	8.29	826	8.29	569	8.29	621	8.29	662
8.295	336	8.295	409	8.295	317	8.295	218	8.295	231	8.295	203	8.295	512	8.295	362	8.295	192	8.295	617	8.295	513	8.295	880	8.295	631	8.295	624	8.295	610
8.3	389	8.3	383	8.3	296	8.3	279	8.3	242	8.3	219	8.3	524	8.3	404	8.3	185	8.3	661	8.3	472	8.3	875	8.3	603	8.3	682	8.3	581
8.305	389	8.305	341	8.305	297	8.305	284	8.305	293	8.305	241	8.305	598	8.305	472	8.305	229	8.305	384	8.305	517	8.305	810	8.305	578	8.305	655	8.305	703
8.31	384	8.31	191	8.31	303	8.31	276	8.31	163	8.31	318	8.31	1154	8.31	480	8.31	230	8.31	357	8.31	565	8.31	799	8.31	608	8.31	651	8.31	777
8.315	371	8.315	353	8.315	292	8.315	299	8.315	235	8.315	362	8.315	1284	8.315	435	8.315	218	8.315	414	8.315	576	8.315	924	8.315	677	8.315	695	8.315	830
8.32	433	8.32	404	8.32	274	8.32	331	8.32	242	8.32	444	8.32	1305	8.32	454	8.32	264	8.32	483	8.32	620	8.32	959	8.32	717	8.32	710	8.32	1050
8.325	574	8.325	390	8.325	297	8.325	311	8.325	284	8.325	474	8.325	771	8.325	576	8.325	299	8.325	552	8.325	586	8.325	902	8.325	735	8.325	715	8.325	1119
8.33	699	8.33	340	8.33	364	8.33	240	8.33	290	8.33	477	8.33	875	8.33	635	8.33	317	8.33	683	8.33	579	8.33	899	8.33	742	8.33	698	8.33	938
8.335	837	8.335	284	8.335	334	8.335	235	8.335	300	8.335	541	8.335	945	8.335	908	8.335	340	8.335	845	8.335	648	8.335	1014	8.335	744	8.335	735	8.335	898
8.34	1008	8.34	241	8.34	233	8.34	256	8.34	312	8.34	672	8.34	836	8.34	509	8.34	302	8.34	1038	8.34	648	8.34	1117	8.34	770	8.34	837	8.34	1018
8.345	1057	8.345	237	8.345	235	8.345	107	8.345	268	8.345	795	8.345	742	8.345	519	8.345	300	8.345	1209	8.345	561	8.345	1170	8.345	781	8.345	827	8.345	1018
8.35	1069	8.35	264	8.35	281	8.35	258	8.35	189	8.35	736	8.35	722	8.35	965	8.35	320	8.35	1246	8.35	530	8.35	1249	8.35	789	8.35	825	8.35	989
8.355	923	8.355	284	8.355	325	8.355	325	8.355	179	8.355	658	8.355	746	8.355	610	8.355	357	8.355	1226	8.355	608	8.355	1406	8.355	802	8.355	905	8.355	987
8.36	902	8.36	282	8.36	302	8.36	331	8.36	227	8.36	695	8.36	749	8.36	603	8.36	368	8.36	1255	8.36	637	8.36	1445	8.36	794	8.36	1011	8.36	972
8.365	950	8.365	297	8.365	228	8.365	286	8.365	200	8.365	705	8.365	665	8.365	568	8.365	365	8.365	1310	8.365	643	8.365	1413	8.365	790	8.365	998	8.365	961
8.37	976	8.37	334	8.37	243	8.37	236	8.37	190	8.37	710	8.37	619	8.37	491	8.37	373	8.37	1251	8.37	687	8.37	1588	8.37	838	8.37	969	8.37	1016
8.375	1007	8.375	345	8.375	301	8.375	193	8.375	221	8.375	664	8.375	974	8.375	438	8.375	344	8.375	1141	8.375	661	8.375	1837	8.375	898	8.375	1096	8.375	1099
8.38	963	8.38	325	8.38	147	8.38	238	8.38	221	8.38	686	8.38	641	8.38	496	8.38	320	8.38	1166	8.38	670	8.38	1843	8.38	876	8.38	1173	8.38	1262
8.385	963	8.385	248	8.385	111	8.385	266	8.385	210	8.385	583	8.385	643	8.385	509	8.385	341	8.385	1172	8.385	801	8.385	1698	8.385	822	8.385	1227	8.385	1194
8.39	1037	8.39	248	8.39	271	8.39	189	8.39	160	8.39	422	8.39	683	8.39	478	8.39	356	8.39	924	8.39	825	8.39	1540	8.39	723	8.39	1232	8.39	1112
8.395	957	8.395	348	8.395	297	8.395	160	8.395	131	8.395	456	8.395	701	8.395	477	8.395	328	8.395	786	8.395	686	8.395	1341	8.395	640	8.395	976	8.395	1043
8.4	869	8.4	355	8.4	330	8.4	162	8.4	141	8.4	501	8.4	607	8.4	558	8.4	313	8.4	835	8.4	622	8.4	1276	8.4	737	8.4	831	8.4	840
8.405	858	8.405	325	8.405	294	8.405	179	8.405	76	8.405	468	8.405	528	8.405	613	8.405	388	8.405	911	8.405	611	8.405	1234	8.405	813	8.405	858	8.405	725
8.41	768	8.41	325	8.41	248	8.41	254	8.41	123	8.41	402	8.41	575	8.41	504	8.41	480	8.41	912	8.41	531	8.41	1221	8.41	648	8.41	810	8.41	672
8.415	784	8.415	312	8.415	252	8.415	193	8.415	136	8.415	368	8.415	557	8.415	442	8.415	514	8.415	760	8.415	505	8.415	1165	8.415	552	8.415	744	8.415	730
8.42	821	8.42	301	8.42	178	8.42	223	8.42	140	8.42	397	8.42	580	8.42	467	8.42	491	8.42	736	8.42	687	8.42	1060	8.42	597	8.42	670	8.42	896
8.425	760	8.425	288	8.425	349	8.425	203	8.425	151	8.425	358	8.425	599	8.425	871	8.425	428	8.425	749	8.425	837	8.425	977	8.425	597	8.425	640	8.425	955
8.43	717	8.43	282	8.43	355	8.43	201	8.43	138	8.43	315	8.43	614	8.43	911	8.43	384	8.43	699	8.43	816	8.43	887	8.43	589	8.43	678	8.43	864
8.435	600	8.435	280	8.435	372	8.435	154	8.435	132	8.435	343	8.435	578	8.435	889	8.435	411	8.435	677	8.435	744	8.435	867	8.435	585	8.435	624	8.435	782
8.44	530	8.44	298	8.44	305	8.44	273	8.44	139	8.44	288	8.44	522	8.44	453	8.44	418	8.44	573	8.44	695	8.44	889	8.44	579	8.44	533	8.44	776
8.445	535	8.445	325	8.445	251	8.445	252	8.445	146	8.445	221	8.445	554	8.445	751	8.445	313	8.445	544	8.445	627	8.445	882	8.445	575	8.445	549	8.445	760
8.45	486	8.45	290	8.45	264	8.45	187	8.45	124	8.45	253	8.45	645	8.45	417	8.45	238	8.45	600	8.45	591	8.45	1007	8.45	553	8.45	586	8.45	717
8.455	431	8.455	268	8.455	213	8.455	177	8.455	126	8.455	244	8.455	621	8.455	435	8.455	276	8.455	593	8.455	542	8.455	1077	8.455	515	8.455	541	8.455	736
8.46	414	8.46	291	8.46	184	8.46	218	8.46	318	8.46	212	8.46	541	8.46	489	8.46	289	8.46	396	8.46	540	8.46	1026	8.46	860	8.46	456	8.46	681
8.465	408	8.465	263	8.465	253	8.465	232	8.465	278	8.465	221	8.465	519	8.465	475	8.465	258	8.465	353	8.465	565	8.465	950	8.465	892	8.465	446	8.465	595
8.47	387	8.47	220	8.47	301	8.47	107	8.47	210	8.47	239	8.47	486	8.47	475	8.47	253	8.47	564	8.47	463	8.47	858	8.47	574	8.47	513	8.47	500
8.475	366	8.475	266	8.475	304	8.475	213	8.475	216	8.475	242	8.475	505	8.475	467	8.475	249	8.475	386	8.475	349	8.475	856	8.475	508	8.475	544	8.475	437
8.48	382	8.48	359	8.48	311	8.48	247	8.48	239	8.48	304	8.48	549	8.48	465	8.48	253	8.48	369	8.48	296	8.48	796	8.48	444	8.48	472	8.48	424
8.485	429	8.485	417	8.485	301	8.485	288	8.485	281	8.485	408	8.485	449	8.485	495	8.485	239	8.485	416	8.485	301	8.485	697	8.485	376	8.485	367	8.485	502
8.49	477	8.49	427	8.49	251	8.49	289	8.49	317	8.49	594	8.49	414	8.49	417	8.49	262	8.49	576	8.49	352	8.49	605	8.49	329	8.49	328	8.49	633
8.495	482	8.495	400	8.495	229	8.495	297	8.495	249	8.495	768	8.495	462	8.495	360	8.495	301	8.495	750	8.495	323	8.495	574	8.495	433	8.495	344	8.495	638
8.5	446	8.5	363	8.5	250	8.5	247	8.5	178	8.5	936	8.5	501	8.5	360	8.5	378	8.5	998	8.5	298	8.5	574	8.5	516	8.5	432	8.5	629
8.505	464	8.505	144	8.505	228	8.505	209	8.505	218	8.505	1137	8.505	482	8.505	451	8.505	405	8.505	1430	8.505	386	8.505	665	8.505	555	8.505	558	8.505	752
8.51	504	8.51	278	8.51	224	8.51	214	8.51	252	8.51	1202	8.51	452	8.51	499	8.51	445	8.51	1798	8.51	439	8.51	738	8.51	669	8.51	661	8.51	962
8.515	549	8.515	222	8.515	291	8.515	279	8.515	202	8.515	1213	8.515	435	8.515	453	8.515	453	8.515	1877	8.515	567	8.515	894	8.515	830	8.515	805	8.515	1121
8.52	752	8.52	225	8.52	198	8.52	343	8.52	179	8.52	1387	8.52	421	8.52	409	8.52	526	8.52	1696	8.52	773	8.52	1133	8.52	1057	8.52	1186	8.52	1277
8.525	1013	8.525	211	8.525	182	8.525	362	8.525	222	8.525	1593	8.525	450	8.525	428	8.525	577	8.525	1593	8.525	894	8.525	1163	8.525	1337	8.525	1564	8.525	1475
8.53	1029	8.53	400	8.53	351	8.53	340	8.53	306	8.53	1872	8.53	436	8.53	472	8.53	602	8.53	1872	8.53	959	8.53	1203	8.53	1473	8.53	1795	8.53	1586
8.535	927	8.535	377	8.535	133	8.535	304	8.535	342	8.535	2112	8.535	415	8.535	488	8.535	771	8.535	2527	8.535	1104	8.535	1210	8.535	1596	8.535	1777	8.535	1578
8.54	928	8.54	351	8.54	292	8.54	230	8.54	289	8.54	2132	8.54	446	8.54	420	8.54	1013	8.54	3222	8.54	1315	8.54	1190	8.54	1675	8.54	1634	8.54	1526
8.545	1081	8.545	308	8.545	408	8.545	182	8.545	271	8.545	2147	8.545	466	8.545	422	8.545	1408	8.545	4594	8.545	1651	8.545	1176	8.545	1832	8.545	1706	8.545	1688
8.55	1264	8.55	305	8.55	418	8.55	234	8.55	326	8.55	2088	8.55	351	8.55	504	8.55	2163	8.55	3381	8.55	2522	8.55	1254	8.55	2320	8.55	2197	8.55	2083
8.555	1682	8.555	362	8.555	299	8.555	203	8.555	226	8.555	1870	8.555	344	8.555	606	8.555	2882	8.555	2869	8.555	3690	8.555	1539	8.555	3068	8.555	3127	8.555	2564
8.56	1463	8.56	248	8.56	260	8.56	172	8.56	279	8.56	1693	8.56	446	8.56	731	8.56	2968	8.56	2403	8.56	4276	8.56	1666	8.56	4073	8.56	4019	8.56	3253
8.565	1661	8.565	227	8.565	305	8.565	219	8.565	243	8.565	1465	8.565	433	8.565	888	8.565	2717	8.565	2302	8.565	4338	8.565	1677	8.565	4776	8.565	4458	8.565	3782
8.57	1667	8.57	235	8.57	318	8.57	285	8.57	286	8.57	1180	8.57	437	8.57	889	8.57	2433	8.57	3011	8.57	4354	8.57	1690	8.57	4651	8.57	4229	8.57	3692
8.575	1611	8.575	360	8.575	337	8.575	298	8.575	241	8.575	1116	8.575	672	8.575	832	8.575	2195	8.575	2107	8.575	4053	8.575	1623	8.575	4221	8.575	3552	8.575	3392
8.58	1531	8.58	141	8.58	339	8.58	252	8.58	135	8.58	1030	8.58	847	8.58	898	8.58	1931	8.58	2048	8.58	3554	8.58	1381	8.58	3687	8.58	3057	8.58	3163
8.585	1290	8.585	258	8.585	269	8.585	150	8.585	157	8.585	871	8.585	1027	8.585	899	8.585	1639	8.585	1882	8.585	3030	8.585	1245	8.585	3216	8.585	2792	8.585	2795
8.59	1054	8.59	277	8.59	242	8.59	104	8.59	249	8.59	743	8.59	1277	8.59	749	8.59	1459	8.59	2034	8.59	2445	8.59	1300	8.59	2855	8.59	2420	8.59	2535
8.595	934	8.595	287	8.595	253	8.595	177	8.595	118	8.595	624	8.595	1392	8.595	1155	8.595	1431	8.595	1352	8.595	2016	8.595	1329	8.595	2394	8.595	1988	8.595	2501
8.6	793	8.6	287	8.6	243	8.6	238	8.6	139	8.6	504	8.6	1462	8.6	772	8.6	1466	8.6	1193	8.6	1862	8.6	1316	8.6	2019	8.6	1606	8.6	2352
8.605	719	8.605	263	8.605	278	8.605	232	8.605	237	8.605	452	8.605	1414	8.605	774	8.605	1349	8.605	1000	8.605	1555	8.605	1180	8.605	1775	8.605	1259	8.605	1982
8.61	721	8.61	249	8.61	313	8.61	222	8.61	248	8.61	408	8.61	1136	8.61	721	8.61	1120	8.61	940	8.61	1203	8.61	1013	8.61	1533	8.61	1432	8.61	1709
8.615	615	8.615	273	8.615	299	8.615	221	8.615	226	8.615	362	8.615	1047	8.615	699	8.615	883	8.615	1056	8.615	1352	8.615	911	8.615	1197	8.615	997	8.615	1569
8.62	515	8.62	268	8.62	308	8.62	198	8.62	189	8.62	378	8.62	1067	8.62	686	8.62	738	8.62	714	8.62	972	8.62	902	8.62	944	8.62	808	8.62	1267
8.625	613	8.625	257	8.625	331	8.625	186	8.625	204	8.625	386	8.625	939	8.625	602	8.625	687	8.625	504	8.625	771	8.625	886	8.625	1076	8.625	675	8.625	992
8.63	720	8.63	293	8.63	307	8.63	188	8.63	251	8.63	379	8.63	806	8.63	508	8.63	651	8.63	502	8.63	693	8.63	886	8.63	773	8.63	680	8.63	909
8.635	601	8.635	126	8.635	264	8.635	231	8.635	275	8.635	342	8.635	858	8.635	554	8.635	680	8.635	534	8.635	658	8.635	977	8.635	659	8.635	647	8.635	906
8.64	505	8.64	250	8.64	125	8.64	272	8.64	307	8.64	314	8.64	848	8.64	606	8.64	652	8.64	491	8.64	577	8.64	936	8.64	677	8.64	1286	8.64	984
8.645	563	8.645	130	8.645	144	8.645	225	8.645	308	8.645	345	8.645	848	8.645	658	8.645	568	8.645	505	8.645	581	8.645	857	8.645	704	8.645	728	8.645	1125
8.65	534	8.65	157	8.65	170	8.65	162	8.65	271	8.65	313	8.65	945	8.65	725	8.65	1099	8.65	542	8.65	665	8.65	964	8.65	824	8.65	760	8.65	1120
8.655	452	8.655	149	8.655	173	8.655	149	8.655	223	8.655	232	8.655	952	8.655	686	8.655	522	8.655	492	8.655	694	8.655	1019	8.655	847	8.655	743	8.655	1082
8.66	429	8.66	129	8.66	165	8.66	194	8.66	172	8.66	242	8.66	926	8.66	578	8.66	419	8.66	416	8.66	611	8.66	946	8.66	889	8.66	629	8.66	1149
8.665	437	8.665	120	8.665	322	8.665	235	8.665	167	8.665	271	8.665	923	8.665	541	8.665	363	8.665	725	8.665	525	8.665	919	8.665	645	8.665	562	8.665	1071
8.67	428	8.67	148	8.67	290	8.67	222	8.67	189	8.67	326	8.67	760	8.67	504	8.67	366	8.67	411	8.67	443	8.67	909	8.67	522	8.67	577	8.67	941
8.675	403	8.675	181	8.675	296	8.675	194	8.675	167	8.675	360	8.675	590	8.675	453	8.675	450	8.675	420	8.675	376	8.675	914	8.675	422	8.675	560	8.675	826
8.68	408	8.68	169	8.68	336	8.68	241	8.68	137	8.68	291	8.68	550	8.68	467	8.68	509	8.68	372	8.68	395	8.68	889	8.68	444	8.68	469	8.68	667
8.685	360	8.685	131	8.685	313	8.685	232	8.685	125	8.685	288	8.685	493	8.685	514	8.685	616	8.685	389	8.685	413	8.685	654	8.685	520	8.685	395	8.685	627
8.69	306	8.69	120	8.69	258	8.69	151	8.69	122	8.69	291	8.69	419	8.69	458	8.69	786	8.69	422	8.69	447	8.69	559	8.69	522	8.69	416	8.69	626
8.695	295	8.695	150	8.695	261	8.695	115	8.695	118	8.695	268	8.695	455	8.695	401	8.695	861	8.695	440	8.695	526	8.695	658	8.695	511	8.695	461	8.695	583
8.7	305	8.7	409	8.7	286	8.7	164	8.7	144	8.7	240	8.7	599	8.7	387	8.7	797	8.7	368	8.7	486	8.7	695	8.7	542	8.7	460	8.7	628
8.705	293	8.705	397	8.705	296	8.705	226	8.705	175	8.705	253	8.705	662	8.705	391	8.705	699	8.705	333	8.705	395	8.705	659	8.705	504	8.705	466	8.705	676
8.71	277	8.71	380	8.71	107	8.71	209	8.71	210	8.71	274	8.71	690	8.71	475	8.71	615	8.71	348	8.71	405	8.71	622	8.71	457	8.71	502	8.71	774
8.715	299	8.715	369	8.715	125	8.715	169	8.715	261	8.715	245	8.715	813	8.715	534	8.715	493	8.715	299	8.715	489	8.715	598	8.715	568	8.715	533	8.715	910
8.72	366	8.72	381	8.72	272	8.72	187	8.72	284	8.72	176	8.72	1040	8.72	566	8.72	427	8.72	274	8.72	538	8.72	660	8.72	699	8.72	491	8.72	993
8.725	299	8.725	380	8.725	322	8.725	241	8.725	277	8.725	147	8.725	1411	8.725	627	8.725	439	8.725	247	8.725	610	8.725	694	8.725	777	8.725	412	8.725	1101
8.73	207	8.73	292	8.73	338	8.73	245	8.73	238	8.73	185	8.73	1786	8.73	694	8.73	408	8.73	232	8.73	677	8.73	683	8.73	846	8.73	451	8.73	1286
8.735	210	8.735	211	8.735	327	8.735	240	8.735	188	8.735	197	8.735	1952	8.735	651	8.735	350	8.735	255	8.735	684	8.735	716	8.735	814	8.735	495	8.735	1478
8.74	243	8.74	230	8.74	365	8.74	260	8.74	168	8.74	212	8.74	1892	8.74	579	8.74	302	8.74	294	8.74	688	8.74	725	8.74	724	8.74	470	8.74	1592
8.745	225	8.745	285	8.745	351	8.745	303	8.745	185	8.745	214	8.745	1671	8.745	568	8.745	268	8.745	371	8.745	655	8.745	686	8.745	736	8.745	400	8.745	1446
8.75	261	8.75	323	8.75	288	8.75	261	8.75	210	8.75	229	8.75	1387	8.75	512	8.75	214	8.75	336	8.75	475	8.75	545	8.75	701	8.75	359	8.75	1121
8.755	268	8.755	317	8.755	330	8.755	122	8.755	243	8.755	261	8.755	1096	8.755	410	8.755	196	8.755	272	8.755	376	8.755	473	8.755	643	8.755	316	8.755	906
8.76	218	8.76	299	8.76	370	8.76	134	8.76	258	8.76	250	8.76	960	8.76	401	8.76	213	8.76	366	8.76	384	8.76	566	8.76	581	8.76	364	8.76	856
8.765	192	8.765	150	8.765	333	8.765	165	8.765	265	8.765	224	8.765	845	8.765	400	8.765	245	8.765	428	8.765	407	8.765	605	8.765	490	8.765	320	8.765	742
8.77	204	8.77	141	8.77	173	8.77	216	8.77	245	8.77	213	8.77	603	8.77	389	8.77	245	8.77	323	8.77	367	8.77	563	8.77	415	8.77	316	8.77	633
8.775	248	8.775	264	8.775	325	8.775	258	8.775	226	8.775	197	8.775	470	8.775	317	8.775	192	8.775	270	8.775	365	8.775	514	8.775	346	8.775	304	8.775	616
8.78	293	8.78	291	8.78	229	8.78	247	8.78	271	8.78	189	8.78	555	8.78	264	8.78	163	8.78	275	8.78	365	8.78	518	8.78	352	8.78	323	8.78	616
8.785	333	8.785	351	8.785	97	8.785	209	8.785	315	8.785	222	8.785	537	8.785	356	8.785	204	8.785	312	8.785	325	8.785	514	8.785	417	8.785	335	8.785	576
8.79	314	8.79	370	8.79	254	8.79	207	8.79	306	8.79	229	8.79	443	8.79	416	8.79	272	8.79	303	8.79	266	8.79	498	8.79	422	8.79	265	8.79	588
8.795	284	8.795	335	8.795	351	8.795	196	8.795	299	8.795	244	8.795	480	8.795	400	8.795	292	8.795	320	8.795	302	8.795	426	8.795	370	8.795	294	8.795	604
8.8	314	8.8	283	8.8	319	8.8	182	8.8	271	8.8	233	8.8	512	8.8	336	8.8	252	8.8	381	8.8	385	8.8	406	8.8	374	8.8	291	8.8	540
8.805	303	8.805	251	8.805	245	8.805	216	8.805	215	8.805	220	8.805	438	8.805	301	8.805	276	8.805	347	8.805	379	8.805	446	8.805	350	8.805	213	8.805	506
8.81	280	8.81	247	8.81	235	8.81	240	8.81	189	8.81	227	8.81	432	8.81	307	8.81	248	8.81	249	8.81	393	8.81	467	8.81	346	8.81	224	8.81	510
8.815	279	8.815	270	8.815	287	8.815	220	8.815	215	8.815	223	8.815	397	8.815	331	8.815	202	8.815	243	8.815	397	8.815	472	8.815	387	8.815	288	8.815	504
8.82	301	8.82	290	8.82	365	8.82	200	8.82	298	8.82	186	8.82	360	8.82	296	8.82	179	8.82	314	8.82	384	8.82	432	8.82	302	8.82	311	8.82	544
8.825	371	8.825	317	8.825	205	8.825	221	8.825	155	8.825	181	8.825	411	8.825	323	8.825	206	8.825	367	8.825	358	8.825	418	8.825	312	8.825	291	8.825	568
8.83	403	8.83	326	8.83	144	8.83	252	8.83	132	8.83	207	8.83	401	8.83	352	8.83	202	8.83	419	8.83	314	8.83	447	8.83	398	8.83	280	8.83	603
8.835	378	8.835	277	8.835	240	8.835	233	8.835	214	8.835	232	8.835	328	8.835	358	8.835	161	8.835	433	8.835	296	8.835	499	8.835	432	8.835	299	8.835	603
8.84	353	8.84	160	8.84	280	8.84	210	8.84	226	8.84	250	8.84	310	8.84	362	8.84	173	8.84	408	8.84	361	8.84	536	8.84	412	8.84	343	8.84	560
8.845	379	8.845	142	8.845	282	8.845	211	8.845	261	8.845	267	8.845	326	8.845	321	8.845	218	8.845	372	8.845	384	8.845	599	8.845	466	8.845	388	8.845	472
8.85	324	8.85	270	8.85	286	8.85	233	8.85	250	8.85	218	8.85	405	8.85	301	8.85	261	8.85	388	8.85	350	8.85	561	8.85	466	8.85	443	8.85	477
8.855	291	8.855	357	8.855	359	8.855	250	8.855	241	8.855	203	8.855	463	8.855	345	8.855	271	8.855	399	8.855	376	8.855	494	8.855	453	8.855	424	8.855	557
8.86	352	8.86	376	8.86	381	8.86	228	8.86	260	8.86	245	8.86	437	8.86	390	8.86	261	8.86	488	8.86	430	8.86	519	8.86	503	8.86	342	8.86	531
8.865	363	8.865	370	8.865	329	8.865	147	8.865	259	8.865	226	8.865	422	8.865	371	8.865	275	8.865	544	8.865	421	8.865	588	8.865	444	8.865	307	8.865	440
8.87	333	8.87	344	8.87	373	8.87	88	8.87	260	8.87	211	8.87	424	8.87	340	8.87	285	8.87	504	8.87	389	8.87	609	8.87	426	8.87	328	8.87	445
8.875	256	8.875	165	8.875	427	8.875	103	8.875	132	8.875	236	8.875	399	8.875	304	8.875	278	8.875	467	8.875	354	8.875	548	8.875	411	8.875	393	8.875	474
8.88	285	8.88	321	8.88	367	8.88	132	8.88	280	8.88	309	8.88	387	8.88	326	8.88	261	8.88	488	8.88	301	8.88	508	8.88	371	8.88	349	8.88	483
8.885	443	8.885	437	8.885	368	8.885	173	8.885	300	8.885	337	8.885	429	8.885	384	8.885	197	8.885	431	8.885	269	8.885	486	8.885	397	8.885	247	8.885	477
8.89	475	8.89	441	8.89	371	8.89	229	8.89	278	8.89	280	8.89	435	8.89	379	8.89	128	8.89	350	8.89	257	8.89	468	8.89	431	8.89	252	8.89	435
8.895	426	8.895	362	8.895	113	8.895	248	8.895	251	8.895	232	8.895	391	8.895	388	8.895	138	8.895	360	8.895	264	8.895	522	8.895	419	8.895	357	8.895	461
8.9	448	8.9	358	8.9	278	8.9	183	8.9	279	8.9	217	8.9	312	8.9	365	8.9	236	8.9	402	8.9	291	8.9	514	8.9	384	8.9	369	8.9	482
8.905	499	8.905	350	8.905	272	8.905	165	8.905	281	8.905	241	8.905	328	8.905	285	8.905	355	8.905	433	8.905	334	8.905	519	8.905	352	8.905	306	8.905	480
8.91	546	8.91	298	8.91	268	8.91	232	8.91	229	8.91	214	8.91	402	8.91	296	8.91	398	8.91	421	8.91	383	8.91	513	8.91	420	8.91	332	8.91	582
8.915	539	8.915	284	8.915	280	8.915	281	8.915	232	8.915	191	8.915	424	8.915	374	8.915	400	8.915	460	8.915	467	8.915	509	8.915	475	8.915	398	8.915	862
8.92	563	8.92	335	8.92	294	8.92	313	8.92	224	8.92	195	8.92	512	8.92	400	8.92	388	8.92	493	8.92	467	8.92	492	8.92	416	8.92	443	8.92	1003
8.925	509	8.925	169	8.925	314	8.925	360	8.925	229	8.925	173	8.925	560	8.925	362	8.925	315	8.925	390	8.925	395	8.925	553	8.925	373	8.925	424	8.925	999
8.93	412	8.93	150	8.93	295	8.93	321	8.93	246	8.93	172	8.93	555	8.93	334	8.93	200	8.93	363	8.93	312	8.93	564	8.93	384	8.93	393	8.93	1015
8.935	342	8.935	125	8.935	218	8.935	224	8.935	215	8.935	203	8.935	531	8.935	353	8.935	235	8.935	400	8.935	248	8.935	467	8.935	355	8.935	391	8.935	1055
8.94	369	8.94	160	8.94	155	8.94	117	8.94	146	8.94	224	8.94	462	8.94	371	8.94	248	8.94	376	8.94	267	8.94	445	8.94	306	8.94	392	8.94	938
8.945	434	8.945	312	8.945	200	8.945	165	8.945	103	8.945	246	8.945	445	8.945	389	8.945	219	8.945	446	8.945	305	8.945	474	8.945	327	8.945	390	8.945	824
8.95	367	8.95	294	8.95	90	8.95	290	8.95	112	8.95	280	8.95	438	8.95	360	8.95	261	8.95	485	8.95	324	8.95	620	8.95	365	8.95	347	8.95	754
8.955	333	8.955	117	8.955	254	8.955	240	8.955	137	8.955	283	8.955	486	8.955	307	8.955	275	8.955	487	8.955	333	8.955	689	8.955	365	8.955	268	8.955	690
8.96	349	8.96	124	8.96	245	8.96	201	8.96	155	8.96	286	8.96	592	8.96	361	8.96	237	8.96	508	8.96	312	8.96	688	8.96	425	8.96	230	8.96	680
8.965	382	8.965	162	8.965	236	8.965	218	8.965	198	8.965	307	8.965	646	8.965	423	8.965	384	8.965	436	8.965	306	8.965	849	8.965	543	8.965	256	8.965	800
8.97	360	8.97	301	8.97	226	8.97	222	8.97	218	8.97	317	8.97	716	8.97	416	8.97	280	8.97	523	8.97	323	8.97	878	8.97	599	8.97	339	8.97	944
8.975	308	8.975	372	8.975	210	8.975	218	8.975	218	8.975	293	8.975	785	8.975	429	8.975	243	8.975	387	8.975	351	8.975	704	8.975	562	8.975	370	8.975	866
8.98	328	8.98	424	8.98	230	8.98	204	8.98	232	8.98	272	8.98	665	8.98	338	8.98	512	8.98	442	8.98	366	8.98	638	8.98	491	8.98	304	8.98	804
8.985	404	8.985	174	8.985	276	8.985	115	8.985	181	8.985	243	8.985	524	8.985	337	8.985	496	8.985	459	8.985	424	8.985	617	8.985	440	8.985	278	8.985	797
8.99	371	8.99	143	8.99	286	8.99	206	8.99	212	8.99	197	8.99	431	8.99	432	8.99	277	8.99	421	8.99	547	8.99	545	8.99	475	8.99	353	8.99	789
8.995	293	8.995	151	8.995	294	8.995	242	8.995	203	8.995	136	8.995	421	8.995	542	8.995	200	8.995	402	8.995	589	8.995	573	8.995	487	8.995	408	8.995	816
9	225	9	138	9	311	9	251	9	224	9	182	9	434	9	439	9	133	9	299	9	507	9	598	9	454	9	372	9	740
9.005	218	9.005	107	9.005	309	9.005	236	9.005	271	9.005	264	9.005	455	9.005	399	9.005	148	9.005	341	9.005	448	9.005	588	9.005	416	9.005	312	9.005	587
9.01	252	9.01	292	9.01	330	9.01	273	9.01	264	9.01	234	9.01	520	9.01	448	9.01	184	9.01	358	9.01	470	9.01	532	9.01	387	9.01	354	9.01	565
9.015	298	9.015	277	9.015	318	9.015	358	9.015	255	9.015	150	9.015	467	9.015	445	9.015	152	9.015	269	9.015	449	9.015	577	9.015	360	9.015	363	9.015	591
9.02	314	9.02	332	9.02	296	9.02	356	9.02	289	9.02	141	9.02	411	9.02	417	9.02	137	9.02	229	9.02	365	9.02	520	9.02	347	9.02	357	9.02	558
9.025	277	9.025	417	9.025	301	9.025	304	9.025	302	9.025	139	9.025	464	9.025	391	9.025	118	9.025	291	9.025	288	9.025	492	9.025	364	9.025	331	9.025	522
9.03	269	9.03	387	9.03	342	9.03	270	9.03	240	9.03	149	9.03	497	9.03	393	9.03	138	9.03	280	9.03	254	9.03	431	9.03	381	9.03	326	9.03	496
9.035	322	9.035	335	9.035	329	9.035	90	9.035	163	9.035	216	9.035	459	9.035	350	9.035	132	9.035	300	9.035	265	9.035	418	9.035	360	9.035	323	9.035	469
9.04	402	9.04	120	9.04	270	9.04	276	9.04	166	9.04	288	9.04	478	9.04	381	9.04	149	9.04	374	9.04	325	9.04	403	9.04	388	9.04	301	9.04	445
9.045	429	9.045	296	9.045	267	9.045	259	9.045	191	9.045	306	9.045	577	9.045	381	9.045	166	9.045	395	9.045	359	9.045	418	9.045	470	9.045	291	9.045	498
9.05	465	9.05	155	9.05	267	9.05	109	9.05	212	9.05	283	9.05	772	9.05	403	9.05	223	9.05	411	9.05	412	9.05	442	9.05	498	9.05	295	9.05	683
9.055	561	9.055	189	9.055	235	9.055	223	9.055	207	9.055	269	9.055	1016	9.055	453	9.055	339	9.055	507	9.055	503	9.055	495	9.055	544	9.055	288	9.055	926
9.06	531	9.06	220	9.06	128	9.06	208	9.06	209	9.06	288	9.06	1101	9.06	522	9.06	490	9.06	629	9.06	534	9.06	551	9.06	598	9.06	285	9.06	1135
9.065	475	9.065	356	9.065	151	9.065	216	9.065	231	9.065	329	9.065	1172	9.065	586	9.065	729	9.065	699	9.065	582	9.065	619	9.065	619	9.065	317	9.065	1524
9.07	509	9.07	279	9.07	265	9.07	230	9.07	252	9.07	371	9.07	1329	9.07	677	9.07	1190	9.07	632	9.07	611	9.07	681	9.07	604	9.07	360	9.07	2038
9.075	466	9.075	234	9.075	232	9.075	212	9.075	273	9.075	342	9.075	1317	9.075	835	9.075	1840	9.075	606	9.075	569	9.075	728	9.075	650	9.075	432	9.075	2440
9.08	354	9.08	238	9.08	220	9.08	236	9.08	257	9.08	283	9.08	1407	9.08	995	9.08	2408	9.08	690	9.08	571	9.08	914	9.08	722	9.08	464	9.08	2977
9.085	350	9.085	234	9.085	279	9.085	271	9.085	228	9.085	281	9.085	1575	9.085	1037	9.085	2718	9.085	669	9.085	505	9.085	1089	9.085	720	9.085	531	9.085	3533
9.09	403	9.09	218	9.09	348	9.09	244	9.09	237	9.09	317	9.09	1460	9.09	999	9.09	2550	9.09	557	9.09	424	9.09	1084	9.09	715	9.09	605	9.09	3602
9.095	363	9.095	263	9.095	383	9.095	211	9.095	263	9.095	312	9.095	1372	9.095	1032	9.095	2084	9.095	419	9.095	456	9.095	1018	9.095	695	9.095	507	9.095	3393
9.1	280	9.1	285	9.1	317	9.1	188	9.1	279	9.1	280	9.1	1224	9.1	970	9.1	1566	9.1	379	9.1	465	9.1	909	9.1	672	9.1	448	9.1	3069
9.105	247	9.105	134	9.105	215	9.105	176	9.105	280	9.105	277	9.105	992	9.105	738	9.105	1118	9.105	328	9.105	446	9.105	750	9.105	558	9.105	445	9.105	2443
9.11	286	9.11	148	9.11	210	9.11	266	9.11	226	9.11	291	9.11	789	9.11	584	9.11	763	9.11	292	9.11	332	9.11	631	9.11	424	9.11	400	9.11	1723
9.115	292	9.115	281	9.115	279	9.115	352	9.115	194	9.115	232	9.115	637	9.115	434	9.115	572	9.115	415	9.115	296	9.115	505	9.115	389	9.115	378	9.115	1265
9.12	346	9.12	283	9.12	305	9.12	309	9.12	208	9.12	148	9.12	642	9.12	362	9.12	443	9.12	426	9.12	330	9.12	439	9.12	430	9.12	381	9.12	989
9.125	749	9.125	262	9.125	281	9.125	262	9.125	226	9.125	147	9.125	632	9.125	416	9.125	391	9.125	422	9.125	328	9.125	499	9.125	400	9.125	343	9.125	803
9.13	444	9.13	271	9.13	301	9.13	236	9.13	249	9.13	194	9.13	504	9.13	395	9.13	333	9.13	368	9.13	317	9.13	545	9.13	335	9.13	269	9.13	630
9.135	355	9.135	292	9.135	345	9.135	171	9.135	273	9.135	214	9.135	395	9.135	358	9.135	267	9.135	341	9.135	365	9.135	539	9.135	360	9.135	283	9.135	480
9.14	344	9.14	320	9.14	362	9.14	152	9.14	272	9.14	179	9.14	368	9.14	387	9.14	224	9.14	380	9.14	416	9.14	527	9.14	391	9.14	345	9.14	438
9.145	394	9.145	341	9.145	196	9.145	159	9.145	253	9.145	142	9.145	350	9.145	324	9.145	174	9.145	379	9.145	376	9.145	540	9.145	344	9.145	328	9.145	515
9.15	344	9.15	319	9.15	192	9.15	173	9.15	258	9.15	152	9.15	390	9.15	288	9.15	174	9.15	369	9.15	320	9.15	530	9.15	396	9.15	284	9.15	503
9.155	227	9.155	311	9.155	192	9.155	221	9.155	261	9.155	153	9.155	476	9.155	293	9.155	180	9.155	345	9.155	342	9.155	505	9.155	457	9.155	254	9.155	445
9.16	159	9.16	372	9.16	155	9.16	231	9.16	231	9.16	151	9.16	472	9.16	433	9.16	168	9.16	360	9.16	402	9.16	540	9.16	376	9.16	294	9.16	386
9.165	168	9.165	451	9.165	219	9.165	233	9.165	185	9.165	189	9.165	417	9.165	463	9.165	171	9.165	368	9.165	340	9.165	561	9.165	295	9.165	331	9.165	362
9.17	188	9.17	420	9.17	267	9.17	100	9.17	211	9.17	226	9.17	408	9.17	371	9.17	201	9.17	352	9.17	294	9.17	598	9.17	327	9.17	324	9.17	419
9.175	202	9.175	324	9.175	286	9.175	262	9.175	237	9.175	256	9.175	424	9.175	320	9.175	220	9.175	320	9.175	298	9.175	651	9.175	312	9.175	293	9.175	553
9.18	258	9.18	328	9.18	272	9.18	249	9.18	204	9.18	238	9.18	524	9.18	344	9.18	224	9.18	261	9.18	365	9.18	567	9.18	299	9.18	242	9.18	656
9.185	295	9.185	333	9.185	247	9.185	208	9.185	226	9.185	168	9.185	635	9.185	352	9.185	208	9.185	211	9.185	418	9.185	467	9.185	307	9.185	233	9.185	673
9.19	301	9.19	332	9.19	240	9.19	214	9.19	236	9.19	134	9.19	622	9.19	294	9.19	175	9.19	259	9.19	422	9.19	438	9.19	378	9.19	235	9.19	627
9.195	312	9.195	353	9.195	244	9.195	266	9.195	218	9.195	151	9.195	726	9.195	314	9.195	184	9.195	330	9.195	373	9.195	411	9.195	455	9.195	286	9.195	724
9.2	280	9.2	309	9.2	231	9.2	238	9.2	246	9.2	222	9.2	881	9.2	356	9.2	233	9.2	344	9.2	323	9.2	449	9.2	456	9.2	309	9.2	742
9.205	283	9.205	128	9.205	221	9.205	205	9.205	230	9.205	300	9.205	771	9.205	365	9.205	274	9.205	315	9.205	323	9.205	533	9.205	432	9.205	313	9.205	704
9.21	276	9.21	144	9.21	247	9.21	258	9.21	189	9.21	303	9.21	600	9.21	343	9.21	286	9.21	248	9.21	295	9.21	578	9.21	434	9.21	301	9.21	653
9.215	276	9.215	280	9.215	290	9.215	282	9.215	205	9.215	227	9.215	579	9.215	360	9.215	317	9.215	253	9.215	239	9.215	604	9.215	435	9.215	319	9.215	572
9.22	344	9.22	261	9.22	325	9.22	112	9.22	225	9.22	159	9.22	544	9.22	379	9.22	353	9.22	307	9.22	224	9.22	575	9.22	394	9.22	322	9.22	437
9.225	328	9.225	253	9.225	307	9.225	209	9.225	174	9.225	141	9.225	460	9.225	333	9.225	325	9.225	353	9.225	244	9.225	489	9.225	277	9.225	296	9.225	392
9.23	280	9.23	213	9.23	255	9.23	216	9.23	128	9.23	137	9.23	430	9.23	265	9.23	257	9.23	359	9.23	288	9.23	404	9.23	256	9.23	327	9.23	456
9.235	246	9.235	100	9.235	238	9.235	203	9.235	126	9.235	146	9.235	431	9.235	237	9.235	243	9.235	390	9.235	314	9.235	420	9.235	320	9.235	348	9.235	409
9.24	246	9.24	230	9.24	240	9.24	251	9.24	178	9.24	177	9.24	509	9.24	305	9.24	289	9.24	475	9.24	304	9.24	422	9.24	328	9.24	318	9.24	381
9.245	232	9.245	242	9.245	244	9.245	288	9.245	240	9.245	195	9.245	465	9.245	374	9.245	287	9.245	520	9.245	254	9.245	393	9.245	352	9.245	318	9.245	454
9.25	247	9.25	286	9.25	253	9.25	246	9.25	251	9.25	232	9.25	499	9.25	347	9.25	237	9.25	494	9.25	224	9.25	393	9.25	362	9.25	344	9.25	528
9.255	280	9.255	302	9.255	260	9.255	125	9.255	241	9.255	289	9.255	610	9.255	332	9.255	224	9.255	506	9.255	264	9.255	463	9.255	327	9.255	333	9.255	616
9.26	240	9.26	252	9.26	245	9.26	215	9.26	228	9.26	294	9.26	624	9.26	363	9.26	222	9.26	488	9.26	317	9.26	517	9.26	297	9.26	280	9.26	1121
9.265	176	9.265	235	9.265	220	9.265	267	9.265	224	9.265	208	9.265	538	9.265	381	9.265	200	9.265	437	9.265	357	9.265	526	9.265	315	9.265	288	9.265	578
9.27	198	9.27	274	9.27	204	9.27	306	9.27	228	9.27	181	9.27	522	9.27	389	9.27	220	9.27	415	9.27	359	9.27	503	9.27	398	9.27	341	9.27	446
9.275	270	9.275	305	9.275	71	9.275	186	9.275	167	9.275	198	9.275	472	9.275	332	9.275	251	9.275	365	9.275	327	9.275	486	9.275	464	9.275	334	9.275	482
9.28	288	9.28	272	9.28	186	9.28	178	9.28	68	9.28	186	9.28	377	9.28	299	9.28	234	9.28	364	9.28	253	9.28	527	9.28	419	9.28	299	9.28	558
9.285	299	9.285	237	9.285	273	9.285	119	9.285	229	9.285	180	9.285	349	9.285	322	9.285	210	9.285	388	9.285	237	9.285	525	9.285	381	9.285	328	9.285	570
9.29	273	9.29	235	9.29	285	9.29	186	9.29	251	9.29	186	9.29	424	9.29	396	9.29	198	9.29	337	9.29	237	9.29	509	9.29	360	9.29	282	9.29	530
9.295	223	9.295	269	9.295	243	9.295	242	9.295	85	9.295	205	9.295	421	9.295	421	9.295	179	9.295	248	9.295	273	9.295	548	9.295	334	9.295	259	9.295	456
9.3	200	9.3	298	9.3	255	9.3	156	9.3	57	9.3	182	9.3	327	9.3	459	9.3	173	9.3	213	9.3	320	9.3	540	9.3	294	9.3	250	9.3	452
9.305	213	9.305	147	9.305	296	9.305	257	9.305	59	9.305	178	9.305	334	9.305	439	9.305	195	9.305	251	9.305	301	9.305	499	9.305	288	9.305	264	9.305	536
9.31	223	9.31	248	9.31	296	9.31	241	9.31	231	9.31	214	9.31	391	9.31	405	9.31	228	9.31	288	9.31	309	9.31	477	9.31	265	9.31	256	9.31	520
9.315	259	9.315	301	9.315	206	9.315	208	9.315	302	9.315	230	9.315	464	9.315	352	9.315	216	9.315	321	9.315	288	9.315	430	9.315	285	9.315	208	9.315	408
9.32	378	9.32	310	9.32	160	9.32	175	9.32	275	9.32	261	9.32	427	9.32	315	9.32	227	9.32	374	9.32	269	9.32	389	9.32	347	9.32	234	9.32	355
9.325	627	9.325	151	9.325	171	9.325	135	9.325	247	9.325	286	9.325	368	9.325	347	9.325	280	9.325	414	9.325	275	9.325	451	9.325	384	9.325	245	9.325	401
9.33	946	9.33	178	9.33	86	9.33	122	9.33	277	9.33	383	9.33	331	9.33	395	9.33	283	9.33	390	9.33	323	9.33	489	9.33	363	9.33	256	9.33	390
9.335	1172	9.335	211	9.335	228	9.335	149	9.335	291	9.335	584	9.335	312	9.335	417	9.335	264	9.335	474	9.335	287	9.335	448	9.335	381	9.335	312	9.335	303
9.34	1323	9.34	458	9.34	132	9.34	153	9.34	266	9.34	897	9.34	323	9.34	426	9.34	282	9.34	712	9.34	216	9.34	484	9.34	368	9.34	319	9.34	309
9.345	1437	9.345	438	9.345	163	9.345	247	9.345	98	9.345	1111	9.345	318	9.345	432	9.345	328	9.345	971	9.345	189	9.345	574	9.345	322	9.345	312	9.345	342
9.35	1389	9.35	208	9.35	200	9.35	240	9.35	241	9.35	1214	9.35	289	9.35	348	9.35	327	9.35	1197	9.35	329	9.35	694	9.35	334	9.35	435	9.35	309
9.355	1129	9.355	322	9.355	188	9.355	251	9.355	246	9.355	1192	9.355	314	9.355	279	9.355	334	9.355	1293	9.355	550	9.355	961	9.355	404	9.355	513	9.355	309
9.36	940	9.36	329	9.36	176	9.36	236	9.36	316	9.36	1021	9.36	321	9.36	306	9.36	348	9.36	1404	9.36	720	9.36	1524	9.36	512	9.36	582	9.36	403
9.365	772	9.365	302	9.365	171	9.365	222	9.365	297	9.365	779	9.365	372	9.365	432	9.365	401	9.365	1389	9.365	886	9.365	2371	9.365	643	9.365	765	9.365	477
9.37	514	9.37	307	9.37	337	9.37	246	9.37	191	9.37	569	9.37	440	9.37	483	9.37	440	9.37	1162	9.37	957	9.37	3252	9.37	744	9.37	1051	9.37	580
9.375	322	9.375	288	9.375	295	9.375	280	9.375	236	9.375	400	9.375	332	9.375	393	9.375	425	9.375	936	9.375	915	9.375	3813	9.375	781	9.375	1218	9.375	675
9.38	382	9.38	304	9.38	116	9.38	301	9.38	303	9.38	345	9.38	348	9.38	313	9.38	352	9.38	736	9.38	855	9.38	3807	9.38	679	9.38	1183	9.38	659
9.385	470	9.385	366	9.385	141	9.385	260	9.385	293	9.385	309	9.385	438	9.385	339	9.385	308	9.385	587	9.385	714	9.385	3201	9.385	542	9.385	1036	9.385	574
9.39	494	9.39	328	9.39	268	9.39	192	9.39	265	9.39	338	9.39	389	9.39	419	9.39	271	9.39	541	9.39	531	9.39	2344	9.39	475	9.39	858	9.39	516
9.395	548	9.395	250	9.395	255	9.395	180	9.395	256	9.395	356	9.395	360	9.395	482	9.395	246	9.395	566	9.395	402	9.395	1595	9.395	436	9.395	649	9.395	477
9.4	609	9.4	281	9.4	321	9.4	184	9.4	87	9.4	367	9.4	381	9.4	471	9.4	200	9.4	538	9.4	367	9.4	1226	9.4	395	9.4	418	9.4	432
9.405	622	9.405	334	9.405	164	9.405	196	9.405	85	9.405	426	9.405	388	9.405	384	9.405	250	9.405	462	9.405	315	9.405	1029	9.405	362	9.405	316	9.405	371
9.41	664	9.41	316	9.41	117	9.41	221	9.41	236	9.41	460	9.41	389	9.41	323	9.41	261	9.41	472	9.41	266	9.41	867	9.41	365	9.41	353	9.41	403
9.415	770	9.415	286	9.415	107	9.415	252	9.415	202	9.415	406	9.415	369	9.415	336	9.415	256	9.415	413	9.415	299	9.415	753	9.415	341	9.415	369	9.415	474
9.42	829	9.42	179	9.42	284	9.42	232	9.42	161	9.42	331	9.42	382	9.42	320	9.42	245	9.42	426	9.42	321	9.42	670	9.42	382	9.42	392	9.42	451
9.425	745	9.425	182	9.425	366	9.425	200	9.425	170	9.425	257	9.425	450	9.425	350	9.425	246	9.425	390	9.425	277	9.425	614	9.425	439	9.425	443	9.425	416
9.43	513	9.43	219	9.43	310	9.43	94	9.43	230	9.43	204	9.43	435	9.43	357	9.43	256	9.43	449	9.43	261	9.43	566	9.43	459	9.43	463	9.43	453
9.435	390	9.435	261	9.435	224	9.435	239	9.435	279	9.435	200	9.435	384	9.435	325	9.435	258	9.435	531	9.435	282	9.435	602	9.435	408	9.435	457	9.435	491
9.44	333	9.44	363	9.44	238	9.44	265	9.44	241	9.44	181	9.44	389	9.44	372	9.44	248	9.44	408	9.44	288	9.44	676	9.44	339	9.44	365	9.44	531
9.445	290	9.445	342	9.445	71	9.445	151	9.445	234	9.445	183	9.445	413	9.445	387	9.445	221	9.445	324	9.445	271	9.445	663	9.445	375	9.445	237	9.445	517
9.45	296	9.45	173	9.45	220	9.45	179	9.45	252	9.45	163	9.45	411	9.45	344	9.45	203	9.45	307	9.45	271	9.45	630	9.45	381	9.45	224	9.45	440
9.455	343	9.455	176	9.455	223	9.455	170	9.455	206	9.455	142	9.455	333	9.455	325	9.455	197	9.455	221	9.455	246	9.455	696	9.455	328	9.455	304	9.455	411
9.46	382	9.46	274	9.46	283	9.46	150	9.46	167	9.46	180	9.46	312	9.46	304	9.46	185	9.46	256	9.46	237	9.46	669	9.46	320	9.46	325	9.46	389
9.465	309	9.465	264	9.465	136	9.465	129	9.465	170	9.465	216	9.465	365	9.465	313	9.465	224	9.465	337	9.465	309	9.465	597	9.465	331	9.465	280	9.465	360
9.47	309	9.47	131	9.47	271	9.47	245	9.47	212	9.47	216	9.47	336	9.47	282	9.47	203	9.47	373	9.47	352	9.47	545	9.47	321	9.47	301	9.47	382
9.475	397	9.475	110	9.475	205	9.475	205	9.475	261	9.475	189	9.475	283	9.475	267	9.475	138	9.475	426	9.475	320	9.475	549	9.475	278	9.475	366	9.475	383
9.48	458	9.48	93	9.48	222	9.48	178	9.48	288	9.48	182	9.48	329	9.48	234	9.48	167	9.48	363	9.48	295	9.48	510	9.48	291	9.48	357	9.48	362
9.485	495	9.485	103	9.485	285	9.485	202	9.485	276	9.485	198	9.485	384	9.485	286	9.485	265	9.485	323	9.485	253	9.485	496	9.485	307	9.485	309	9.485	368
9.49	560	9.49	277	9.49	300	9.49	213	9.49	125	9.49	232	9.49	399	9.49	312	9.49	278	9.49	419	9.49	214	9.49	509	9.49	270	9.49	253	9.49	381
9.495	530	9.495	279	9.495	281	9.495	211	9.495	299	9.495	350	9.495	368	9.495	328	9.495	197	9.495	459	9.495	262	9.495	500	9.495	340	9.495	227	9.495	368
9.5	528	9.5	253	9.5	246	9.5	243	9.5	268	9.5	440	9.5	310	9.5	393	9.5	190	9.5	479	9.5	336	9.5	529	9.5	377	9.5	280	9.5	330
9.505	619	9.505	258	9.505	239	9.505	272	9.505	237	9.505	484	9.505	313	9.505	387	9.505	168	9.505	526	9.505	334	9.505	586	9.505	352	9.505	307	9.505	350
9.51	680	9.51	272	9.51	182	9.51	217	9.51	270	9.51	533	9.51	398	9.51	320	9.51	197	9.51	527	9.51	323	9.51	630	9.51	331	9.51	273	9.51	440
9.515	651	9.515	114	9.515	272	9.515	179	9.515	245	9.515	579	9.515	442	9.515	361	9.515	264	9.515	483	9.515	315	9.515	606	9.515	383	9.515	259	9.515	488
9.52	491	9.52	343	9.52	251	9.52	259	9.52	156	9.52	611	9.52	475	9.52	344	9.52	254	9.52	531	9.52	352	9.52	603	9.52	374	9.52	334	9.52	467
9.525	547	9.525	404	9.525	240	9.525	295	9.525	110	9.525	655	9.525	544	9.525	317	9.525	295	9.525	626	9.525	408	9.525	613	9.525	357	9.525	427	9.525	493
9.53	656	9.53	215	9.53	259	9.53	179	9.53	107	9.53	726	9.53	629	9.53	384	9.53	326	9.53	696	9.53	403	9.53	711	9.53	403	9.53	429	9.53	584
9.535	766	9.535	334	9.535	237	9.535	192	9.535	182	9.535	696	9.535	708	9.535	480	9.535	302	9.535	747	9.535	451	9.535	790	9.535	411	9.535	434	9.535	617
9.54	1253	9.54	133	9.54	182	9.54	165	9.54	212	9.54	836	9.54	741	9.54	504	9.54	274	9.54	900	9.54	430	9.54	815	9.54	480	9.54	453	9.54	563
9.545	1493	9.545	153	9.545	166	9.545	280	9.545	216	9.545	1272	9.545	733	9.545	444	9.545	232	9.545	1532	9.545	408	9.545	914	9.545	585	9.545	512	9.545	497
9.55	1944	9.55	173	9.55	166	9.55	317	9.55	247	9.55	1728	9.55	663	9.55	408	9.55	233	9.55	1868	9.55	376	9.55	1016	9.55	594	9.55	606	9.55	536
9.555	1946	9.555	189	9.555	171	9.555	106	9.555	220	9.555	2189	9.555	581	9.555	376	9.555	251	9.555	2344	9.555	406	9.555	1151	9.555	560	9.555	591	9.555	610
9.56	1622	9.56	174	9.56	133	9.56	182	9.56	193	9.56	2774	9.56	529	9.56	376	9.56	210	9.56	3246	9.56	435	9.56	1425	9.56	518	9.56	556	9.56	589
9.565	1440	9.565	351	9.565	168	9.565	227	9.565	188	9.565	3157	9.565	616	9.565	413	9.565	190	9.565	3739	9.565	441	9.565	1897	9.565	466	9.565	565	9.565	565
9.57	1327	9.57	123	9.57	142	9.57	198	9.57	161	9.57	3002	9.57	757	9.57	399	9.57	200	9.57	3667	9.57	461	9.57	2814	9.57	489	9.57	581	9.57	600
9.575	1129	9.575	144	9.575	112	9.575	278	9.575	149	9.575	2464	9.575	840	9.575	352	9.575	200	9.575	3354	9.575	499	9.575	3923	9.575	587	9.575	588	9.575	722
9.58	893	9.58	321	9.58	119	9.58	262	9.58	206	9.58	1891	9.58	879	9.58	437	9.58	185	9.58	2643	9.58	526	9.58	4578	9.58	739	9.58	713	9.58	741
9.585	683	9.585	318	9.585	141	9.585	271	9.585	260	9.585	1299	9.585	833	9.585	482	9.585	224	9.585	1781	9.585	522	9.585	4838	9.585	770	9.585	929	9.585	767
9.59	540	9.59	331	9.59	144	9.59	216	9.59	241	9.59	812	9.59	1548	9.59	426	9.59	283	9.59	1120	9.59	474	9.59	4775	9.59	794	9.59	984	9.59	784
9.595	546	9.595	157	9.595	181	9.595	229	9.595	220	9.595	492	9.595	646	9.595	420	9.595	291	9.595	664	9.595	482	9.595	4142	9.595	763	9.595	1001	9.595	635
9.6	506	9.6	391	9.6	275	9.6	198	9.6	247	9.6	246	9.6	579	9.6	485	9.6	285	9.6	418	9.6	464	9.6	3094	9.6	664	9.6	1027	9.6	524
9.605	390	9.605	390	9.605	235	9.605	306	9.605	218	9.605	182	9.605	548	9.605	530	9.605	275	9.605	389	9.605	368	9.605	2072	9.605	608	9.605	925	9.605	523
9.61	332	9.61	318	9.61	236	9.61	258	9.61	147	9.61	201	9.61	568	9.61	480	9.61	264	9.61	343	9.61	324	9.61	1398	9.61	548	9.61	778	9.61	542
9.615	320	9.615	256	9.615	256	9.615	247	9.615	173	9.615	261	9.615	584	9.615	442	9.615	273	9.615	323	9.615	293	9.615	981	9.615	467	9.615	670	9.615	603
9.62	251	9.62	287	9.62	239	9.62	275	9.62	188	9.62	250	9.62	540	9.62	438	9.62	266	9.62	320	9.62	315	9.62	776	9.62	498	9.62	496	9.62	576
9.625	168	9.625	176	9.625	237	9.625	317	9.625	184	9.625	186	9.625	499	9.625	358	9.625	235	9.625	317	9.625	382	9.625	726	9.625	474	9.625	304	9.625	456
9.63	138	9.63	181	9.63	261	9.63	338	9.63	212	9.63	283	9.63	550	9.63	278	9.63	216	9.63	426	9.63	384	9.63	609	9.63	438	9.63	285	9.63	457
9.635	218	9.635	354	9.635	245	9.635	301	9.635	139	9.635	500	9.635	584	9.635	324	9.635	212	9.635	539	9.635	370	9.635	469	9.635	499	9.635	406	9.635	575
9.64	368	9.64	386	9.64	212	9.64	202	9.64	250	9.64	636	9.64	521	9.64	410	9.64	194	9.64	557	9.64	347	9.64	409	9.64	544	9.64	424	9.64	603
9.645	387	9.645	346	9.645	218	9.645	161	9.645	209	9.645	641	9.645	408	9.645	463	9.645	176	9.645	606	9.645	311	9.645	438	9.645	517	9.645	365	9.645	522
9.65	373	9.65	303	9.65	241	9.65	193	9.65	99	9.65	513	9.65	400	9.65	473	9.65	185	9.65	723	9.65	280	9.65	539	9.65	450	9.65	326	9.65	459
9.655	389	9.655	284	9.655	260	9.655	251	9.655	213	9.655	317	9.655	396	9.655	409	9.655	184	9.655	713	9.655	304	9.655	716	9.655	456	9.655	327	9.655	526
9.66	347	9.66	278	9.66	251	9.66	334	9.66	175	9.66	200	9.66	435	9.66	408	9.66	147	9.66	656	9.66	385	9.66	825	9.66	559	9.66	336	9.66	523
9.665	290	9.665	347	9.665	244	9.665	322	9.665	112	9.665	154	9.665	496	9.665	414	9.665	160	9.665	536	9.665	440	9.665	869	9.665	627	9.665	317	9.665	523
9.67	317	9.67	388	9.67	274	9.67	264	9.67	128	9.67	150	9.67	461	9.67	470	9.67	186	9.67	392	9.67	433	9.67	901	9.67	653	9.67	325	9.67	607
9.675	331	9.675	327	9.675	338	9.675	287	9.675	172	9.675	155	9.675	422	9.675	565	9.675	192	9.675	387	9.675	360	9.675	848	9.675	619	9.675	383	9.675	571
9.68	307	9.68	229	9.68	332	9.68	302	9.68	216	9.68	160	9.68	479	9.68	538	9.68	208	9.68	406	9.68	373	9.68	760	9.68	512	9.68	459	9.68	508
9.685	307	9.685	196	9.685	290	9.685	224	9.685	254	9.685	198	9.685	540	9.685	462	9.685	284	9.685	402	9.685	434	9.685	712	9.685	466	9.685	494	9.685	558
9.69	351	9.69	235	9.69	322	9.69	160	9.69	253	9.69	211	9.69	659	9.69	437	9.69	349	9.69	469	9.69	434	9.69	705	9.69	464	9.69	518	9.69	640
9.695	340	9.695	335	9.695	302	9.695	190	9.695	230	9.695	250	9.695	855	9.695	573	9.695	415	9.695	515	9.695	508	9.695	784	9.695	555	9.695	605	9.695	796
9.7	379	9.7	426	9.7	264	9.7	222	9.7	208	9.7	251	9.7	971	9.7	757	9.7	479	9.7	490	9.7	581	9.7	882	9.7	802	9.7	768	9.7	1194
9.705	380	9.705	367	9.705	316	9.705	199	9.705	191	9.705	241	9.705	1022	9.705	976	9.705	463	9.705	479	9.705	555	9.705	1025	9.705	950	9.705	958	9.705	1067
9.71	373	9.71	194	9.71	352	9.71	158	9.71	202	9.71	319	9.71	1011	9.71	1004	9.71	385	9.71	539	9.71	515	9.71	1108	9.71	985	9.71	1014	9.71	1199
9.715	471	9.715	165	9.715	357	9.715	195	9.715	218	9.715	342	9.715	938	9.715	928	9.715	339	9.715	629	9.715	494	9.715	1085	9.715	850	9.715	923	9.715	1385
9.72	552	9.72	329	9.72	355	9.72	316	9.72	184	9.72	278	9.72	822	9.72	791	9.72	325	9.72	627	9.72	496	9.72	951	9.72	696	9.72	810	9.72	1257
9.725	508	9.725	287	9.725	315	9.725	399	9.725	151	9.725	233	9.725	806	9.725	667	9.725	333	9.725	536	9.725	417	9.725	863	9.725	621	9.725	647	9.725	918
9.73	470	9.73	261	9.73	289	9.73	330	9.73	174	9.73	164	9.73	791	9.73	514	9.73	275	9.73	539	9.73	346	9.73	863	9.73	563	9.73	568	9.73	680
9.735	462	9.735	269	9.735	307	9.735	148	9.735	214	9.735	117	9.735	626	9.735	456	9.735	181	9.735	565	9.735	365	9.735	817	9.735	566	9.735	460	9.735	619
9.74	426	9.74	233	9.74	298	9.74	109	9.74	254	9.74	115	9.74	536	9.74	453	9.74	174	9.74	518	9.74	411	9.74	769	9.74	533	9.74	432	9.74	648
9.745	392	9.745	207	9.745	338	9.745	238	9.745	303	9.745	132	9.745	504	9.745	454	9.745	232	9.745	508	9.745	430	9.745	711	9.745	474	9.745	512	9.745	598
9.75	329	9.75	206	9.75	345	9.75	135	9.75	296	9.75	127	9.75	519	9.75	442	9.75	292	9.75	486	9.75	416	9.75	740	9.75	489	9.75	501	9.75	520
9.755	359	9.755	229	9.755	304	9.755	265	9.755	207	9.755	118	9.755	599	9.755	442	9.755	254	9.755	360	9.755	408	9.755	788	9.755	541	9.755	516	9.755	499
9.76	435	9.76	273	9.76	293	9.76	253	9.76	207	9.76	120	9.76	672	9.76	488	9.76	251	9.76	352	9.76	373	9.76	740	9.76	516	9.76	632	9.76	606
9.765	466	9.765	176	9.765	271	9.765	270	9.765	264	9.765	150	9.765	682	9.765	537	9.765	241	9.765	416	9.765	452	9.765	641	9.765	413	9.765	545	9.765	675
9.77	430	9.77	176	9.77	248	9.77	249	9.77	206	9.77	224	9.77	617	9.77	581	9.77	248	9.77	422	9.77	451	9.77	509	9.77	414	9.77	416	9.77	562
9.775	400	9.775	206	9.775	226	9.775	265	9.775	199	9.775	245	9.775	572	9.775	564	9.775	264	9.775	407	9.775	362	9.775	495	9.775	514	9.775	435	9.775	469
9.78	357	9.78	421	9.78	119	9.78	363	9.78	252	9.78	259	9.78	573	9.78	450	9.78	261	9.78	515	9.78	374	9.78	553	9.78	562	9.78	423	9.78	523
9.785	413	9.785	438	9.785	213	9.785	337	9.785	246	9.785	266	9.785	552	9.785	377	9.785	240	9.785	566	9.785	384	9.785	540	9.785	535	9.785	360	9.785	644
9.79	445	9.79	368	9.79	258	9.79	272	9.79	217	9.79	250	9.79	523	9.79	504	9.79	285	9.79	459	9.79	441	9.79	592	9.79	542	9.79	398	9.79	665
9.795	381	9.795	312	9.795	202	9.795	271	9.795	191	9.795	204	9.795	496	9.795	613	9.795	342	9.795	376	9.795	408	9.795	625	9.795	542	9.795	421	9.795	629
9.8	304	9.8	288	9.8	181	9.8	160	9.8	188	9.8	228	9.8	560	9.8	565	9.8	321	9.8	458	9.8	353	9.8	579	9.8	500	9.8	441	9.8	653
9.805	280	9.805	230	9.805	220	9.805	122	9.805	105	9.805	227	9.805	693	9.805	535	9.805	312	9.805	529	9.805	371	9.805	630	9.805	498	9.805	478	9.805	744
9.81	365	9.81	253	9.81	257	9.81	264	9.81	173	9.81	182	9.81	726	9.81	550	9.81	347	9.81	534	9.81	386	9.81	738	9.81	557	9.81	467	9.81	757
9.815	408	9.815	324	9.815	300	9.815	323	9.815	89	9.815	170	9.815	673	9.815	528	9.815	295	9.815	542	9.815	349	9.815	732	9.815	590	9.815	464	9.815	682
9.82	330	9.82	332	9.82	306	9.82	317	9.82	182	9.82	208	9.82	637	9.82	419	9.82	222	9.82	531	9.82	352	9.82	643	9.82	573	9.82	445	9.82	611
9.825	288	9.825	115	9.825	264	9.825	262	9.825	244	9.825	222	9.825	622	9.825	372	9.825	250	9.825	431	9.825	384	9.825	621	9.825	530	9.825	501	9.825	593
9.83	283	9.83	128	9.83	237	9.83	273	9.83	304	9.83	178	9.83	584	9.83	400	9.83	265	9.83	318	9.83	398	9.83	636	9.83	467	9.83	588	9.83	612
9.835	226	9.835	294	9.835	267	9.835	279	9.835	286	9.835	99	9.835	538	9.835	419	9.835	264	9.835	274	9.835	372	9.835	602	9.835	449	9.835	593	9.835	601
9.84	154	9.84	289	9.84	269	9.84	131	9.84	234	9.84	136	9.84	509	9.84	464	9.84	232	9.84	307	9.84	356	9.84	622	9.84	496	9.84	561	9.84	528
9.845	129	9.845	271	9.845	192	9.845	149	9.845	226	9.845	176	9.845	442	9.845	486	9.845	216	9.845	293	9.845	379	9.845	604	9.845	496	9.845	540	9.845	487
9.85	159	9.85	297	9.85	180	9.85	136	9.85	215	9.85	170	9.85	416	9.85	481	9.85	254	9.85	336	9.85	392	9.85	573	9.85	468	9.85	461	9.85	467
9.855	197	9.855	289	9.855	218	9.855	121	9.855	188	9.855	190	9.855	471	9.855	430	9.855	277	9.855	372	9.855	400	9.855	602	9.855	468	9.855	445	9.855	429
9.86	265	9.86	91	9.86	217	9.86	184	9.86	146	9.86	235	9.86	558	9.86	335	9.86	247	9.86	403	9.86	435	9.86	602	9.86	477	9.86	455	9.86	497
9.865	338	9.865	341	9.865	262	9.865	114	9.865	154	9.865	252	9.865	646	9.865	314	9.865	224	9.865	411	9.865	445	9.865	598	9.865	470	9.865	432	9.865	676
9.87	384	9.87	305	9.87	325	9.87	265	9.87	211	9.87	200	9.87	676	9.87	360	9.87	206	9.87	423	9.87	438	9.87	685	9.87	447	9.87	419	9.87	827
9.875	339	9.875	190	9.875	275	9.875	268	9.875	217	9.875	217	9.875	725	9.875	508	9.875	240	9.875	493	9.875	485	9.875	648	9.875	469	9.875	444	9.875	996
9.88	307	9.88	137	9.88	212	9.88	255	9.88	217	9.88	269	9.88	747	9.88	576	9.88	264	9.88	596	9.88	520	9.88	628	9.88	536	9.88	438	9.88	1416
9.885	359	9.885	176	9.885	231	9.885	252	9.885	238	9.885	236	9.885	646	9.885	493	9.885	248	9.885	618	9.885	457	9.885	691	9.885	576	9.885	467	9.885	1987
9.89	369	9.89	170	9.89	251	9.89	189	9.89	229	9.89	229	9.89	608	9.89	488	9.89	251	9.89	579	9.89	458	9.89	733	9.89	662	9.89	565	9.89	2618
9.895	297	9.895	361	9.895	223	9.895	174	9.895	242	9.895	265	9.895	687	9.895	558	9.895	269	9.895	563	9.895	551	9.895	763	9.895	693	9.895	629	9.895	2875
9.9	251	9.9	294	9.9	152	9.9	247	9.9	117	9.9	268	9.9	879	9.9	586	9.9	280	9.9	635	9.9	578	9.9	855	9.9	746	9.9	619	9.9	2501
9.905	272	9.905	83	9.905	148	9.905	310	9.905	214	9.905	235	9.905	972	9.905	623	9.905	279	9.905	628	9.905	544	9.905	910	9.905	880	9.905	627	9.905	1906
9.91	280	9.91	100	9.91	182	9.91	345	9.91	192	9.91	189	9.91	922	9.91	700	9.91	299	9.91	519	9.91	512	9.91	849	9.91	888	9.91	609	9.91	1549
9.915	303	9.915	301	9.915	112	9.915	361	9.915	215	9.915	174	9.915	915	9.915	703	9.915	280	9.915	475	9.915	533	9.915	790	9.915	839	9.915	598	9.915	1293
9.92	334	9.92	297	9.92	190	9.92	340	9.92	248	9.92	154	9.92	928	9.92	693	9.92	304	9.92	852	9.92	530	9.92	842	9.92	803	9.92	624	9.92	1083
9.925	369	9.925	308	9.925	254	9.925	343	9.925	254	9.925	140	9.925	746	9.925	723	9.925	363	9.925	409	9.925	413	9.925	884	9.925	730	9.925	643	9.925	978
9.93	290	9.93	364	9.93	253	9.93	306	9.93	220	9.93	208	9.93	603	9.93	635	9.93	381	9.93	436	9.93	400	9.93	814	9.93	792	9.93	727	9.93	831
9.935	259	9.935	387	9.935	256	9.935	128	9.935	175	9.935	471	9.935	649	9.935	611	9.935	376	9.935	515	9.935	522	9.935	767	9.935	895	9.935	799	9.935	773
9.94	445	9.94	200	9.94	227	9.94	150	9.94	190	9.94	962	9.94	686	9.94	587	9.94	374	9.94	725	9.94	584	9.94	727	9.94	874	9.94	735	9.94	915
9.945	460	9.945	136	9.945	272	9.945	175	9.945	232	9.945	1575	9.945	752	9.945	519	9.945	327	9.945	1386	9.945	597	9.945	662	9.945	811	9.945	644	9.945	963
9.95	387	9.95	115	9.95	245	9.95	146	9.95	249	9.95	2195	9.95	788	9.95	499	9.95	276	9.95	2692	9.95	546	9.95	624	9.95	730	9.95	672	9.95	846
9.955	413	9.955	113	9.955	256	9.955	87	9.955	224	9.955	2784	9.955	787	9.955	467	9.955	280	9.955	4198	9.955	481	9.955	622	9.955	672	9.955	592	9.955	750
9.96	445	9.96	309	9.96	171	9.96	270	9.96	195	9.96	3562	9.96	663	9.96	477	9.96	240	9.96	5771	9.96	360	9.96	652	9.96	634	9.96	477	9.96	705
9.965	424	9.965	307	9.965	341	9.965	367	9.965	214	9.965	4198	9.965	563	9.965	415	9.965	235	9.965	7015	9.965	457	9.965	653	9.965	492	9.965	442	9.965	648
9.97	416	9.97	327	9.97	263	9.97	294	9.97	262	9.97	3977	9.97	547	9.97	405	9.97	224	9.97	7436	9.97	576	9.97	688	9.97	474	9.97	558	9.97	624
9.975	377	9.975	347	9.975	225	9.975	217	9.975	291	9.975	3206	9.975	542	9.975	384	9.975	193	9.975	6975	9.975	568	9.975	738	9.975	472	9.975	690	9.975	682
9.98	296	9.98	304	9.98	249	9.98	244	9.98	262	9.98	2311	9.98	509	9.98	458	9.98	210	9.98	5633	9.98	498	9.98	860	9.98	433	9.98	722	9.98	687
9.985	262	9.985	286	9.985	229	9.985	274	9.985	217	9.985	1473	9.985	509	9.985	586	9.985	197	9.985	4020	9.985	484	9.985	1013	9.985	458	9.985	686	9.985	648
9.99	252	9.99	299	9.99	254	9.99	123	9.99	196	9.99	953	9.99	526	9.99	629	9.99	183	9.99	2883	9.99	506	9.99	1042	9.99	502	9.99	685	9.99	654
9.995	291	9.995	153	9.995	280	9.995	129	9.995	135	9.995	706	9.995	486	9.995	592	9.995	181	9.995	2170	9.995	513	9.995	911	9.995	539	9.995	640	9.995	693
10	342	10	276	10	236	10	225	10	114	10	532	10	490	10	498	10	193	10	1634	10	509	10	894	10	597	10	530	10	641
10.005	382	10.005	318	10.005	98	10.005	200	10.005	158	10.005	447	10.005	555	10.005	467	10.005	229	10.005	1350	10.005	511	10.005	864	10.005	683	10.005	526	10.005	595
10.01	384	10.01	363	10.01	128	10.01	104	10.01	217	10.01	392	10.01	528	10.01	525	10.01	245	10.01	1238	10.01	577	10.01	804	10.01	840	10.01	694	10.01	806
10.015	416	10.015	270	10.015	315	10.015	97	10.015	295	10.015	369	10.015	491	10.015	514	10.015	288	10.015	1126	10.015	847	10.015	790	10.015	1160	10.015	790	10.015	1083
10.02	392	10.02	173	10.02	301	10.02	220	10.02	298	10.02	320	10.02	590	10.02	452	10.02	309	10.02	955	10.02	1152	10.02	794	10.02	1566	10.02	942	10.02	1299
10.025	257	10.025	53	10.025	283	10.025	251	10.025	290	10.025	282	10.025	627	10.025	429	10.025	245	10.025	901	10.025	1141	10.025	789	10.025	1644	10.025	1047	10.025	1377
10.03	223	10.03	210	10.03	247	10.03	139	10.03	316	10.03	275	10.03	574	10.03	424	10.03	227	10.03	806	10.03	944	10.03	867	10.03	1413	10.03	984	10.03	1335
10.035	253	10.035	298	10.035	118	10.035	138	10.035	247	10.035	269	10.035	589	10.035	453	10.035	239	10.035	744	10.035	779	10.035	850	10.035	1152	10.035	886	10.035	1249
10.04	251	10.04	303	10.04	252	10.04	112	10.04	249	10.04	314	10.04	616	10.04	494	10.04	233	10.04	661	10.04	570	10.04	751	10.04	831	10.04	721	10.04	1118
10.045	266	10.045	302	10.045	173	10.045	217	10.045	292	10.045	347	10.045	672	10.045	524	10.045	248	10.045	568	10.045	400	10.045	683	10.045	668	10.045	528	10.045	870
10.05	276	10.05	373	10.05	166	10.05	274	10.05	236	10.05	311	10.05	663	10.05	568	10.05	273	10.05	568	10.05	349	10.05	614	10.05	611	10.05	390	10.05	657
10.055	289	10.055	426	10.055	205	10.055	163	10.055	194	10.055	294	10.055	648	10.055	571	10.055	271	10.055	472	10.055	411	10.055	602	10.055	592	10.055	406	10.055	700
10.06	266	10.06	413	10.06	323	10.06	179	10.06	203	10.06	243	10.06	640	10.06	513	10.06	228	10.06	432	10.06	460	10.06	642	10.06	593	10.06	490	10.06	764
10.065	207	10.065	342	10.065	374	10.065	217	10.065	200	10.065	227	10.065	718	10.065	469	10.065	205	10.065	448	10.065	463	10.065	641	10.065	534	10.065	526	10.065	700
10.07	223	10.07	285	10.07	290	10.07	411	10.07	199	10.07	259	10.07	680	10.07	455	10.07	205	10.07	390	10.07	426	10.07	626	10.07	502	10.07	491	10.07	664
10.075	283	10.075	131	10.075	239	10.075	341	10.075	202	10.075	268	10.075	586	10.075	449	10.075	221	10.075	361	10.075	379	10.075	630	10.075	563	10.075	392	10.075	710
10.08	288	10.08	146	10.08	248	10.08	253	10.08	209	10.08	233	10.08	565	10.08	435	10.08	243	10.08	431	10.08	403	10.08	620	10.08	579	10.08	324	10.08	699
10.085	240	10.085	382	10.085	234	10.085	236	10.085	252	10.085	233	10.085	604	10.085	467	10.085	242	10.085	445	10.085	517	10.085	594	10.085	530	10.085	338	10.085	642
10.09	243	10.09	380	10.09	202	10.09	262	10.09	282	10.09	294	10.09	677	10.09	437	10.09	205	10.09	347	10.09	531	10.09	564	10.09	511	10.09	389	10.09	598
10.095	308	10.095	306	10.095	164	10.095	249	10.095	246	10.095	269	10.095	639	10.095	353	10.095	162	10.095	349	10.095	400	10.095	550	10.095	549	10.095	399	10.095	539
10.1	323	10.1	264	10.1	177	10.1	175	10.1	232	10.1	200	10.1	586	10.1	391	10.1	171	10.1	393	10.1	333	10.1	553	10.1	536	10.1	354	10.1	527
10.105	278	10.105	262	10.105	274	10.105	81	10.105	245	10.105	200	10.105	563	10.105	453	10.105	209	10.105	362	10.105	379	10.105	609	10.105	481	10.105	314	10.105	554
10.11	304	10.11	288	10.11	317	10.11	154	10.11	273	10.11	181	10.11	478	10.11	509	10.11	256	10.11	413	10.11	459	10.11	653	10.11	491	10.11	280	10.11	608
10.115	331	10.115	306	10.115	267	10.115	199	10.115	211	10.115	205	10.115	491	10.115	488	10.115	319	10.115	456	10.115	443	10.115	680	10.115	522	10.115	294	10.115	697
10.12	248	10.12	172	10.12	197	10.12	254	10.12	99	10.12	269	10.12	539	10.12	505	10.12	373	10.12	424	10.12	384	10.12	692	10.12	569	10.12	435	10.12	752
10.125	151	10.125	148	10.125	182	10.125	223	10.125	135	10.125	301	10.125	600	10.125	517	10.125	332	10.125	333	10.125	398	10.125	708	10.125	559	10.125	531	10.125	713
10.13	176	10.13	320	10.13	172	10.13	161	10.13	223	10.13	336	10.13	622	10.13	499	10.13	277	10.13	302	10.13	399	10.13	708	10.13	506	10.13	477	10.13	643
10.135	218	10.135	306	10.135	161	10.135	177	10.135	208	10.135	318	10.135	629	10.135	515	10.135	309	10.135	339	10.135	430	10.135	732	10.135	539	10.135	430	10.135	613
10.14	189	10.14	311	10.14	111	10.14	245	10.14	188	10.14	249	10.14	664	10.14	559	10.14	314	10.14	420	10.14	462	10.14	727	10.14	605	10.14	480	10.14	648
10.145	180	10.145	308	10.145	129	10.145	168	10.145	189	10.145	241	10.145	724	10.145	588	10.145	296	10.145	514	10.145	432	10.145	708	10.145	558	10.145	520	10.145	742
10.15	229	10.15	312	10.15	267	10.15	324	10.15	215	10.15	290	10.15	712	10.15	557	10.15	238	10.15	516	10.15	436	10.15	671	10.15	495	10.15	524	10.15	792
10.155	334	10.155	313	10.155	265	10.155	259	10.155	249	10.155	355	10.155	708	10.155	491	10.155	233	10.155	488	10.155	483	10.155	548	10.155	560	10.155	534	10.155	811
10.16	432	10.16	283	10.16	255	10.16	252	10.16	226	10.16	392	10.16	714	10.16	493	10.16	271	10.16	520	10.16	558	10.16	539	10.16	632	10.16	564	10.16	813
10.165	448	10.165	242	10.165	244	10.165	197	10.165	216	10.165	376	10.165	842	10.165	484	10.165	310	10.165	629	10.165	593	10.165	736	10.165	629	10.165	612	10.165	880
10.17	413	10.17	200	10.17	250	10.17	198	10.17	191	10.17	339	10.17	1118	10.17	622	10.17	400	10.17	682	10.17	555	10.17	877	10.17	755	10.17	653	10.17	1012
10.175	383	10.175	183	10.175	296	10.175	146	10.175	134	10.175	252	10.175	1274	10.175	811	10.175	517	10.175	714	10.175	639	10.175	973	10.175	924	10.175	728	10.175	965
10.18	345	10.18	223	10.18	263	10.18	219	10.18	164	10.18	314	10.18	1228	10.18	906	10.18	523	10.18	688	10.18	821	10.18	1065	10.18	941	10.18	761	10.18	1044
10.185	325	10.185	324	10.185	110	10.185	237	10.185	220	10.185	404	10.185	1216	10.185	925	10.185	527	10.185	655	10.185	805	10.185	1111	10.185	865	10.185	790	10.185	1310
10.19	315	10.19	412	10.19	205	10.19	239	10.19	257	10.19	306	10.19	1240	10.19	1021	10.19	524	10.19	602	10.19	673	10.19	1068	10.19	765	10.19	806	10.19	1360
10.195	294	10.195	369	10.195	236	10.195	281	10.195	280	10.195	213	10.195	1155	10.195	1003	10.195	413	10.195	510	10.195	626	10.195	995	10.195	712	10.195	704	10.195	1216
10.2	301	10.2	195	10.2	197	10.2	299	10.2	254	10.2	211	10.2	1131	10.2	912	10.2	344	10.2	509	10.2	600	10.2	936	10.2	658	10.2	501	10.2	1079
10.205	324	10.205	222	10.205	196	10.205	250	10.205	203	10.205	197	10.205	1051	10.205	805	10.205	310	10.205	504	10.205	536	10.205	880	10.205	573	10.205	406	10.205	869
10.21	334	10.21	333	10.21	211	10.21	216	10.21	123	10.21	174	10.21	861	10.21	694	10.21	243	10.21	480	10.21	486	10.21	785	10.21	574	10.21	396	10.21	765
10.215	332	10.215	378	10.215	231	10.215	204	10.215	122	10.215	228	10.215	808	10.215	645	10.215	249	10.215	572	10.215	493	10.215	668	10.215	604	10.215	384	10.215	792
10.22	317	10.22	394	10.22	271	10.22	168	10.22	171	10.22	290	10.22	858	10.22	610	10.22	293	10.22	605	10.22	480	10.22	640	10.22	588	10.22	371	10.22	745
10.225	327	10.225	114	10.225	277	10.225	174	10.225	199	10.225	331	10.225	888	10.225	579	10.225	277	10.225	612	10.225	430	10.225	620	10.225	533	10.225	403	10.225	659
10.23	431	10.23	347	10.23	243	10.23	95	10.23	181	10.23	397	10.23	813	10.23	554	10.23	274	10.23	789	10.23	402	10.23	614	10.23	501	10.23	482	10.23	637
10.235	474	10.235	352	10.235	260	10.235	216	10.235	166	10.235	400	10.235	749	10.235	585	10.235	306	10.235	1123	10.235	358	10.235	702	10.235	477	10.235	475	10.235	681
10.24	393	10.24	274	10.24	280	10.24	127	10.24	218	10.24	400	10.24	717	10.24	579	10.24	336	10.24	1307	10.24	343	10.24	746	10.24	459	10.24	418	10.24	727
10.245	335	10.245	273	10.245	156	10.245	141	10.245	124	10.245	491	10.245	718	10.245	505	10.245	413	10.245	1221	10.245	407	10.245	745	10.245	518	10.245	427	10.245	776
10.25	310	10.25	398	10.25	128	10.25	364	10.25	108	10.25	483	10.25	762	10.25	475	10.25	461	10.25	1019	10.25	469	10.25	802	10.25	633	10.25	451	10.25	824
10.255	241	10.255	458	10.255	286	10.255	333	10.255	147	10.255	370	10.255	861	10.255	524	10.255	464	10.255	760	10.255	561	10.255	866	10.255	646	10.255	484	10.255	815
10.26	187	10.26	194	10.26	145	10.26	240	10.26	169	10.26	314	10.26	914	10.26	597	10.26	472	10.26	498	10.26	552	10.26	869	10.26	524	10.26	555	10.26	908
10.265	246	10.265	165	10.265	289	10.265	174	10.265	203	10.265	338	10.265	906	10.265	666	10.265	406	10.265	450	10.265	507	10.265	906	10.265	534	10.265	576	10.265	1056
10.27	344	10.27	294	10.27	90	10.27	172	10.27	243	10.27	338	10.27	841	10.27	648	10.27	346	10.27	480	10.27	522	10.27	894	10.27	616	10.27	538	10.27	1066
10.275	315	10.275	276	10.275	100	10.275	244	10.275	251	10.275	257	10.275	807	10.275	616	10.275	366	10.275	399	10.275	522	10.275	785	10.275	607	10.275	517	10.275	998
10.28	286	10.28	275	10.28	139	10.28	320	10.28	217	10.28	200	10.28	780	10.28	631	10.28	356	10.28	317	10.28	520	10.28	709	10.28	638	10.28	437	10.28	1000
10.285	253	10.285	338	10.285	194	10.285	303	10.285	207	10.285	223	10.285	856	10.285	530	10.285	307	10.285	278	10.285	573	10.285	694	10.285	643	10.285	404	10.285	1024
10.29	234	10.29	381	10.29	347	10.29	229	10.29	209	10.29	259	10.29	1116	10.29	435	10.29	317	10.29	261	10.29	670	10.29	684	10.29	678	10.29	459	10.29	1132
10.295	242	10.295	362	10.295	187	10.295	235	10.295	86	10.295	244	10.295	1441	10.295	516	10.295	296	10.295	307	10.295	750	10.295	727	10.295	811	10.295	480	10.295	1382
10.3	235	10.3	150	10.3	140	10.3	296	10.3	84	10.3	205	10.3	1754	10.3	679	10.3	320	10.3	375	10.3	695	10.3	711	10.3	894	10.3	448	10.3	1546
10.305	216	10.305	116	10.305	285	10.305	314	10.305	83	10.305	195	10.305	1843	10.305	789	10.305	347	10.305	394	10.305	647	10.305	675	10.305	830	10.305	400	10.305	1440
10.31	222	10.31	215	10.31	291	10.31	186	10.31	105	10.31	221	10.31	1583	10.31	734	10.31	240	10.31	399	10.31	622	10.31	641	10.31	690	10.31	332	10.31	1190
10.315	241	10.315	276	10.315	285	10.315	350	10.315	232	10.315	211	10.315	1176	10.315	616	10.315	164	10.315	467	10.315	515	10.315	596	10.315	580	10.315	331	10.315	1014
10.32	262	10.32	329	10.32	297	10.32	295	10.32	221	10.32	183	10.32	984	10.32	618	10.32	189	10.32	562	10.32	427	10.32	549	10.32	514	10.32	407	10.32	852
10.325	257	10.325	151	10.325	271	10.325	237	10.325	242	10.325	231	10.325	953	10.325	609	10.325	230	10.325	596	10.325	371	10.325	567	10.325	478	10.325	408	10.325	752
10.33	303	10.33	323	10.33	249	10.33	209	10.33	248	10.33	294	10.33	942	10.33	567	10.33	247	10.33	546	10.33	407	10.33	605	10.33	514	10.33	416	10.33	740
10.335	348	10.335	367	10.335	243	10.335	284	10.335	181	10.335	344	10.335	906	10.335	589	10.335	209	10.335	504	10.335	473	10.335	580	10.335	597	10.335	463	10.335	788
10.34	328	10.34	327	10.34	268	10.34	208	10.34	182	10.34	385	10.34	918	10.34	583	10.34	176	10.34	564	10.34	444	10.34	581	10.34	657	10.34	395	10.34	937
10.345	366	10.345	280	10.345	301	10.345	192	10.345	238	10.345	374	10.345	995	10.345	566	10.345	190	10.345	685	10.345	410	10.345	692	10.345	630	10.345	355	10.345	1043
10.35	422	10.35	184	10.35	277	10.35	307	10.35	256	10.35	367	10.35	878	10.35	632	10.35	280	10.35	767	10.35	422	10.35	769	10.35	566	10.35	390	10.35	880
10.355	336	10.355	229	10.355	286	10.355	304	10.355	225	10.355	351	10.355	806	10.355	674	10.355	366	10.355	810	10.355	400	10.355	826	10.355	574	10.355	400	10.355	798
10.36	282	10.36	372	10.36	149	10.36	162	10.36	242	10.36	306	10.36	823	10.36	685	10.36	437	10.36	767	10.36	411	10.36	889	10.36	582	10.36	459	10.36	845
10.365	362	10.365	259	10.365	158	10.365	257	10.365	300	10.365	267	10.365	814	10.365	672	10.365	487	10.365	634	10.365	480	10.365	905	10.365	547	10.365	494	10.365	857
10.37	402	10.37	150	10.37	251	10.37	241	10.37	260	10.37	252	10.37	893	10.37	630	10.37	502	10.37	520	10.37	517	10.37	853	10.37	579	10.37	514	10.37	845
10.375	320	10.375	134	10.375	226	10.375	91	10.375	97	10.375	260	10.375	912	10.375	662	10.375	507	10.375	569	10.375	499	10.375	871	10.375	621	10.375	563	10.375	843
10.38	376	10.38	231	10.38	266	10.38	86	10.38	239	10.38	310	10.38	755	10.38	604	10.38	528	10.38	610	10.38	462	10.38	942	10.38	488	10.38	495	10.38	872
10.385	424	10.385	273	10.385	106	10.385	128	10.385	254	10.385	365	10.385	629	10.385	523	10.385	548	10.385	595	10.385	406	10.385	902	10.385	400	10.385	338	10.385	795
10.39	411	10.39	357	10.39	117	10.39	258	10.39	138	10.39	344	10.39	666	10.39	519	10.39	504	10.39	747	10.39	339	10.39	835	10.39	469	10.39	357	10.39	698
10.395	491	10.395	169	10.395	215	10.395	253	10.395	236	10.395	305	10.395	815	10.395	547	10.395	422	10.395	936	10.395	370	10.395	764	10.395	528	10.395	512	10.395	719
10.4	720	10.4	139	10.4	146	10.4	245	10.4	207	10.4	437	10.4	938	10.4	563	10.4	355	10.4	1013	10.4	479	10.4	701	10.4	606	10.4	539	10.4	967
10.405	990	10.405	136	10.405	256	10.405	329	10.405	191	10.405	680	10.405	1318	10.405	618	10.405	343	10.405	1417	10.405	539	10.405	687	10.405	775	10.405	518	10.405	1386
10.41	1312	10.41	316	10.41	211	10.41	372	10.41	132	10.41	802	10.41	1878	10.41	663	10.41	405	10.41	3074	10.41	614	10.41	808	10.41	828	10.41	549	10.41	1798
10.415	1594	10.415	271	10.415	171	10.415	276	10.415	145	10.415	988	10.415	2104	10.415	674	10.415	499	10.415	3505	10.415	721	10.415	896	10.415	799	10.415	576	10.415	1988
10.42	1728	10.42	299	10.42	175	10.42	249	10.42	118	10.42	1224	10.42	2187	10.42	776	10.42	797	10.42	4436	10.42	771	10.42	949	10.42	867	10.42	525	10.42	1821
10.425	1007	10.425	144	10.425	227	10.425	139	10.425	134	10.425	1189	10.425	2187	10.425	1007	10.425	1522	10.425	4578	10.425	773	10.425	1162	10.425	950	10.425	645	10.425	1699
10.43	1074	10.43	170	10.43	227	10.43	127	10.43	299	10.43	915	10.43	2319	10.43	1224	10.43	2548	10.43	3823	10.43	824	10.43	1832	10.43	1016	10.43	997	10.43	1917
10.435	521	10.435	141	10.435	247	10.435	312	10.435	308	10.435	574	10.435	2753	10.435	1487	10.435	3474	10.435	3633	10.435	939	10.435	2605	10.435	1243	10.435	1277	10.435	2325
10.44	357	10.44	165	10.44	353	10.44	271	10.44	242	10.44	462	10.44	3141	10.44	1847	10.44	3762	10.44	1718	10.44	939	10.44	2886	10.44	1461	10.44	1349	10.44	2536
10.445	314	10.445	297	10.445	373	10.445	223	10.445	171	10.445	408	10.445	2958	10.445	1946	10.445	3338	10.445	1157	10.445	808	10.445	2606	10.445	1527	10.445	1200	10.445	2451
10.45	368	10.45	134	10.45	293	10.45	243	10.45	137	10.45	396	10.45	2328	10.45	1735	10.45	2642	10.45	890	10.45	723	10.45	2176	10.45	1360	10.45	915	10.45	2163
10.455	331	10.455	178	10.455	258	10.455	226	10.455	163	10.455	323	10.455	1869	10.455	1339	10.455	1869	10.455	885	10.455	659	10.455	1807	10.455	1033	10.455	783	10.455	1762
10.46	282	10.46	379	10.46	283	10.46	197	10.46	207	10.46	229	10.46	1483	10.46	1004	10.46	1221	10.46	818	10.46	634	10.46	1483	10.46	739	10.46	649	10.46	1331
10.465	352	10.465	384	10.465	344	10.465	128	10.465	243	10.465	236	10.465	1598	10.465	795	10.465	869	10.465	588	10.465	650	10.465	1116	10.465	631	10.465	661	10.465	1147
10.47	372	10.47	127	10.47	424	10.47	137	10.47	272	10.47	310	10.47	1420	10.47	694	10.47	744	10.47	545	10.47	643	10.47	855	10.47	603	10.47	662	10.47	1227
10.475	333	10.475	139	10.475	401	10.475	317	10.475	117	10.475	258	10.475	1065	10.475	770	10.475	680	10.475	616	10.475	627	10.475	758	10.475	693	10.475	570	10.475	1213
10.48	308	10.48	317	10.48	286	10.48	295	10.48	213	10.48	208	10.48	1107	10.48	821	10.48	555	10.48	653	10.48	688	10.48	815	10.48	767	10.48	514	10.48	1189
10.485	320	10.485	371	10.485	255	10.485	306	10.485	190	10.485	203	10.485	1111	10.485	840	10.485	416	10.485	573	10.485	725	10.485	940	10.485	750	10.485	545	10.485	1325
10.49	313	10.49	405	10.49	164	10.49	280	10.49	92	10.49	313	10.49	1183	10.49	942	10.49	412	10.49	517	10.49	726	10.49	980	10.49	821	10.49	542	10.49	1354
10.495	293	10.495	173	10.495	293	10.495	204	10.495	103	10.495	360	10.495	1208	10.495	955	10.495	448	10.495	524	10.495	686	10.495	912	10.495	896	10.495	488	10.495	1200
10.5	251	10.5	152	10.5	288	10.5	104	10.5	204	10.5	292	10.5	1152	10.5	846	10.5	419	10.5	454	10.5	586	10.5	870	10.5	790	10.5	451	10.5	1062
10.505	207	10.505	202	10.505	321	10.505	106	10.505	182	10.505	208	10.505	1072	10.505	774	10.505	375	10.505	481	10.505	535	10.505	853	10.505	687	10.505	456	10.505	947
10.51	197	10.51	228	10.51	303	10.51	188	10.51	200	10.51	160	10.51	1326	10.51	707	10.51	376	10.51	527	10.51	570	10.51	716	10.51	707	10.51	510	10.51	1109
10.515	299	10.515	339	10.515	122	10.515	216	10.515	232	10.515	187	10.515	1663	10.515	675	10.515	408	10.515	523	10.515	676	10.515	670	10.515	729	10.515	570	10.515	1426
10.52	386	10.52	354	10.52	303	10.52	229	10.52	233	10.52	267	10.52	1879	10.52	672	10.52	398	10.52	402	10.52	740	10.52	759	10.52	884	10.52	602	10.52	1607
10.525	370	10.525	147	10.525	318	10.525	201	10.525	201	10.525	278	10.525	2021	10.525	792	10.525	333	10.525	374	10.525	834	10.525	711	10.525	1141	10.525	579	10.525	1674
10.53	328	10.53	99	10.53	258	10.53	263	10.53	177	10.53	342	10.53	1852	10.53	827	10.53	286	10.53	448	10.53	843	10.53	674	10.53	1024	10.53	592	10.53	1662
10.535	298	10.535	114	10.535	151	10.535	302	10.535	172	10.535	319	10.535	1587	10.535	785	10.535	349	10.535	538	10.535	630	10.535	734	10.535	795	10.535	606	10.535	1531
10.54	259	10.54	261	10.54	179	10.54	303	10.54	175	10.54	258	10.54	1582	10.54	748	10.54	403	10.54	576	10.54	534	10.54	810	10.54	713	10.54	530	10.54	1352
10.545	256	10.545	283	10.545	137	10.545	313	10.545	193	10.545	286	10.545	1700	10.545	795	10.545	434	10.545	605	10.545	660	10.545	882	10.545	776	10.545	534	10.545	1468
10.55	247	10.55	239	10.55	313	10.55	277	10.55	179	10.55	332	10.55	2272	10.55	870	10.55	435	10.55	513	10.55	857	10.55	1071	10.55	1125	10.55	568	10.55	2051
10.555	231	10.555	255	10.555	338	10.555	176	10.555	160	10.555	277	10.555	3364	10.555	960	10.555	392	10.555	431	10.555	1172	10.555	1223	10.555	1378	10.555	526	10.555	2707
10.56	201	10.56	344	10.56	276	10.56	123	10.56	200	10.56	191	10.56	4200	10.56	1075	10.56	384	10.56	398	10.56	1405	10.56	1138	10.56	1398	10.56	571	10.56	3278
10.565	240	10.565	387	10.565	196	10.565	160	10.565	241	10.565	249	10.565	4456	10.565	1178	10.565	404	10.565	418	10.565	1499	10.565	1009	10.565	1565	10.565	611	10.565	3717
10.57	218	10.57	312	10.57	204	10.57	237	10.57	226	10.57	235	10.57	4670	10.57	1379	10.57	390	10.57	469	10.57	1574	10.57	926	10.57	1872	10.57	587	10.57	3923
10.575	232	10.575	219	10.575	307	10.575	252	10.575	209	10.575	208	10.575	5227	10.575	1575	10.575	435	10.575	462	10.575	1647	10.575	922	10.575	2159	10.575	597	10.575	4194
10.58	291	10.58	132	10.58	391	10.58	222	10.58	214	10.58	248	10.58	5822	10.58	1610	10.58	381	10.58	463	10.58	1727	10.58	989	10.58	2406	10.58	717	10.58	4691
10.585	347	10.585	231	10.585	326	10.585	247	10.585	195	10.585	261	10.585	5782	10.585	1555	10.585	277	10.585	436	10.585	1629	10.585	961	10.585	2261	10.585	748	10.585	4861
10.59	347	10.59	311	10.59	230	10.59	294	10.59	225	10.59	228	10.59	4890	10.59	1304	10.59	277	10.59	399	10.59	1318	10.59	769	10.59	1808	10.59	675	10.59	4254
10.595	326	10.595	200	10.595	244	10.595	278	10.595	279	10.595	237	10.595	3648	10.595	1024	10.595	316	10.595	460	10.595	1139	10.595	759	10.595	1394	10.595	613	10.595	3256
10.6	308	10.6	162	10.6	308	10.6	252	10.6	248	10.6	318	10.6	2802	10.6	902	10.6	405	10.6	510	10.6	989	10.6	965	10.6	1302	10.6	675	10.6	2572
10.605	337	10.605	137	10.605	323	10.605	260	10.605	216	10.605	354	10.605	2477	10.605	984	10.605	453	10.605	576	10.605	882	10.605	1013	10.605	1254	10.605	749	10.605	2370
10.61	363	10.61	320	10.61	303	10.61	269	10.61	247	10.61	262	10.61	2352	10.61	1059	10.61	393	10.61	643	10.61	795	10.61	904	10.61	1115	10.61	715	10.61	2164
10.615	315	10.615	323	10.615	322	10.615	267	10.615	314	10.615	165	10.615	2322	10.615	987	10.615	411	10.615	688	10.615	747	10.615	876	10.615	1032	10.615	653	10.615	1867
10.62	228	10.62	371	10.62	331	10.62	264	10.62	345	10.62	193	10.62	2116	10.62	965	10.62	468	10.62	568	10.62	773	10.62	950	10.62	957	10.62	593	10.62	1868
10.625	208	10.625	429	10.625	295	10.625	143	10.625	266	10.625	241	10.625	1764	10.625	891	10.625	401	10.625	487	10.625	766	10.625	1039	10.625	881	10.625	571	10.625	1809
10.63	227	10.63	404	10.63	261	10.63	331	10.63	223	10.63	215	10.63	1634	10.63	794	10.63	323	10.63	375	10.63	696	10.63	1049	10.63	885	10.63	592	10.63	1564
10.635	203	10.635	354	10.635	265	10.635	277	10.635	261	10.635	216	10.635	1731	10.635	809	10.635	301	10.635	350	10.635	715	10.635	927	10.635	909	10.635	549	10.635	1478
10.64	176	10.64	243	10.64	141	10.64	235	10.64	240	10.64	256	10.64	1691	10.64	834	10.64	280	10.64	308	10.64	750	10.64	778	10.64	880	10.64	504	10.64	1500
10.645	228	10.645	346	10.645	145	10.645	209	10.645	186	10.645	248	10.645	1497	10.645	789	10.645	268	10.645	268	10.645	623	10.645	735	10.645	790	10.645	465	10.645	1403
10.65	302	10.65	288	10.65	166	10.65	206	10.65	200	10.65	210	10.65	1367	10.65	711	10.65	261	10.65	304	10.65	485	10.65	775	10.65	784	10.65	435	10.65	1184
10.655	360	10.655	149	10.655	153	10.655	267	10.655	214	10.655	226	10.655	1248	10.655	663	10.655	255	10.655	387	10.655	425	10.655	753	10.655	780	10.655	453	10.655	960
10.66	358	10.66	155	10.66	224	10.66	148	10.66	203	10.66	301	10.66	1173	10.66	653	10.66	243	10.66	381	10.66	485	10.66	705	10.66	715	10.66	499	10.66	975
10.665	315	10.665	253	10.665	205	10.665	382	10.665	209	10.665	288	10.665	1168	10.665	649	10.665	233	10.665	378	10.665	574	10.665	734	10.665	696	10.665	528	10.665	979
10.67	277	10.67	252	10.67	220	10.67	326	10.67	186	10.67	211	10.67	1004	10.67	674	10.67	246	10.67	455	10.67	628	10.67	737	10.67	688	10.67	429	10.67	1003
10.675	243	10.675	160	10.675	325	10.675	277	10.675	142	10.675	213	10.675	920	10.675	683	10.675	293	10.675	440	10.675	648	10.675	693	10.675	697	10.675	470	10.675	936
10.68	216	10.68	342	10.68	333	10.68	302	10.68	155	10.68	206	10.68	937	10.68	617	10.68	307	10.68	400	10.68	613	10.68	657	10.68	708	10.68	560	10.68	801
10.685	175	10.685	270	10.685	137	10.685	288	10.685	184	10.685	179	10.685	1027	10.685	638	10.685	246	10.685	349	10.685	599	10.685	703	10.685	747	10.685	546	10.685	812
10.69	194	10.69	234	10.69	203	10.69	256	10.69	177	10.69	174	10.69	1043	10.69	720	10.69	189	10.69	312	10.69	584	10.69	757	10.69	811	10.69	467	10.69	947
10.695	239	10.695	273	10.695	127	10.695	270	10.695	163	10.695	202	10.695	1126	10.695	676	10.695	166	10.695	309	10.695	563	10.695	745	10.695	811	10.695	476	10.695	1009
10.7	229	10.7	257	10.7	315	10.7	245	10.7	196	10.7	214	10.7	1109	10.7	592	10.7	174	10.7	353	10.7	606	10.7	718	10.7	646	10.7	504	10.7	1016
10.705	248	10.705	243	10.705	335	10.705	239	10.705	109	10.705	225	10.705	1024	10.705	593	10.705	219	10.705	331	10.705	619	10.705	718	10.705	573	10.705	543	10.705	992
10.71	253	10.71	288	10.71	328	10.71	249	10.71	126	10.71	205	10.71	1000	10.71	606	10.71	269	10.71	364	10.71	559	10.71	753	10.71	624	10.71	545	10.71	939
10.715	203	10.715	168	10.715	308	10.715	212	10.715	231	10.715	182	10.715	948	10.715	580	10.715	275	10.715	396	10.715	547	10.715	748	10.715	669	10.715	487	10.715	857
10.72	216	10.72	138	10.72	221	10.72	101	10.72	244	10.72	154	10.72	914	10.72	538	10.72	277	10.72	401	10.72	565	10.72	762	10.72	647	10.72	489	10.72	837
10.725	231	10.725	159	10.725	225	10.725	70	10.725	254	10.725	187	10.725	896	10.725	598	10.725	309	10.725	426	10.725	594	10.725	748	10.725	736	10.725	466	10.725	917
10.73	244	10.73	342	10.73	270	10.73	206	10.73	290	10.73	251	10.73	944	10.73	664	10.73	317	10.73	437	10.73	631	10.73	722	10.73	835	10.73	448	10.73	1080
10.735	194	10.735	126	10.735	106	10.735	261	10.735	299	10.735	275	10.735	1646	10.735	604	10.735	250	10.735	413	10.735	710	10.735	754	10.735	833	10.735	459	10.735	1231
10.74	177	10.74	318	10.74	234	10.74	172	10.74	111	10.74	269	10.74	1428	10.74	563	10.74	228	10.74	469	10.74	739	10.74	767	10.74	836	10.74	484	10.74	1305
10.745	246	10.745	298	10.745	216	10.745	230	10.745	70	10.745	267	10.745	1565	10.745	717	10.745	316	10.745	471	10.745	668	10.745	710	10.745	898	10.745	575	10.745	1302
10.75	296	10.75	308	10.75	258	10.75	205	10.75	67	10.75	262	10.75	1662	10.75	852	10.75	358	10.75	383	10.75	689	10.75	702	10.75	984	10.75	622	10.75	1335
10.755	340	10.755	308	10.755	278	10.755	244	10.755	206	10.755	328	10.755	1746	10.755	948	10.755	378	10.755	421	10.755	842	10.755	889	10.755	1002	10.755	660	10.755	1462
10.76	322	10.76	249	10.76	222	10.76	288	10.76	300	10.76	383	10.76	1842	10.76	874	10.76	429	10.76	515	10.76	946	10.76	997	10.76	941	10.76	728	10.76	1545
10.765	280	10.765	215	10.765	127	10.765	318	10.765	296	10.765	346	10.765	1861	10.765	760	10.765	411	10.765	509	10.765	928	10.765	935	10.765	947	10.765	727	10.765	1649
10.77	270	10.77	197	10.77	299	10.77	357	10.77	224	10.77	301	10.77	1807	10.77	879	10.77	328	10.77	474	10.77	831	10.77	897	10.77	960	10.77	655	10.77	1715
10.775	307	10.775	161	10.775	272	10.775	344	10.775	217	10.775	229	10.775	1671	10.775	914	10.775	274	10.775	424	10.775	776	10.775	905	10.775	888	10.775	659	10.775	1562
10.78	292	10.78	167	10.78	214	10.78	286	10.78	120	10.78	189	10.78	1581	10.78	803	10.78	283	10.78	467	10.78	764	10.78	979	10.78	874	10.78	728	10.78	1476
10.785	246	10.785	203	10.785	237	10.785	159	10.785	124	10.785	159	10.785	1736	10.785	707	10.785	309	10.785	514	10.785	803	10.785	1033	10.785	933	10.785	730	10.785	1552
10.79	235	10.79	255	10.79	318	10.79	276	10.79	142	10.79	162	10.79	1963	10.79	695	10.79	354	10.79	419	10.79	875	10.79	931	10.79	1014	10.79	626	10.79	1672
10.795	230	10.795	269	10.795	122	10.795	313	10.795	312	10.795	152	10.795	2163	10.795	729	10.795	382	10.795	304	10.795	918	10.795	747	10.795	1120	10.795	623	10.795	1861
10.8	291	10.8	170	10.8	115	10.8	227	10.8	287	10.8	136	10.8	2366	10.8	845	10.8	398	10.8	251	10.8	1013	10.8	716	10.8	1208	10.8	700	10.8	1994
10.805	326	10.805	176	10.805	130	10.805	164	10.805	289	10.805	154	10.805	2388	10.805	870	10.805	326	10.805	346	10.805	1044	10.805	751	10.805	1134	10.805	703	10.805	1951
10.81	280	10.81	167	10.81	316	10.81	199	10.81	264	10.81	169	10.81	2182	10.81	821	10.81	267	10.81	464	10.81	915	10.81	711	10.81	978	10.81	616	10.81	1746
10.815	181	10.815	171	10.815	349	10.815	228	10.815	203	10.815	179	10.815	1739	10.815	747	10.815	282	10.815	471	10.815	760	10.815	714	10.815	928	10.815	547	10.815	1641
10.82	158	10.82	172	10.82	302	10.82	244	10.82	107	10.82	185	10.82	1413	10.82	622	10.82	325	10.82	493	10.82	736	10.82	686	10.82	864	10.82	530	10.82	1642
10.825	225	10.825	158	10.825	239	10.825	228	10.825	113	10.825	232	10.825	1277	10.825	561	10.825	344	10.825	470	10.825	712	10.825	659	10.825	781	10.825	530	10.825	1414
10.83	270	10.83	128	10.83	93	10.83	190	10.83	192	10.83	225	10.83	1105	10.83	626	10.83	292	10.83	419	10.83	589	10.83	735	10.83	738	10.83	585	10.83	1226
10.835	285	10.835	110	10.835	93	10.835	181	10.835	193	10.835	223	10.835	1190	10.835	648	10.835	267	10.835	376	10.835	483	10.835	796	10.835	736	10.835	584	10.835	1268
10.84	286	10.84	168	10.84	198	10.84	189	10.84	221	10.84	223	10.84	1354	10.84	615	10.84	295	10.84	336	10.84	518	10.84	739	10.84	680	10.84	561	10.84	1203
10.845	309	10.845	327	10.845	210	10.845	191	10.845	250	10.845	169	10.845	1507	10.845	656	10.845	286	10.845	357	10.845	661	10.845	767	10.845	651	10.845	587	10.845	1084
10.85	295	10.85	276	10.85	273	10.85	235	10.85	95	10.85	104	10.85	1568	10.85	769	10.85	270	10.85	357	10.85	791	10.85	862	10.85	741	10.85	643	10.85	1465
10.855	243	10.855	264	10.855	290	10.855	274	10.855	248	10.855	112	10.855	1654	10.855	847	10.855	352	10.855	352	10.855	809	10.855	809	10.855	889	10.855	765	10.855	1435
10.86	206	10.86	280	10.86	204	10.86	271	10.86	235	10.86	152	10.86	1925	10.86	938	10.86	339	10.86	357	10.86	789	10.86	778	10.86	973	10.86	727	10.86	1651
10.865	191	10.865	301	10.865	162	10.865	262	10.865	260	10.865	219	10.865	1939	10.865	993	10.865	331	10.865	325	10.865	722	10.865	751	10.865	954	10.865	599	10.865	1588
10.87	229	10.87	293	10.87	190	10.87	230	10.87	304	10.87	333	10.87	1683	10.87	909	10.87	387	10.87	389	10.87	653	10.87	711	10.87	870	10.87	597	10.87	1355
10.875	227	10.875	241	10.875	268	10.875	102	10.875	280	10.875	385	10.875	1521	10.875	795	10.875	384	10.875	473	10.875	669	10.875	758	10.875	862	10.875	573	10.875	1343
10.88	218	10.88	253	10.88	350	10.88	136	10.88	198	10.88	298	10.88	1487	10.88	746	10.88	336	10.88	416	10.88	704	10.88	759	10.88	892	10.88	578	10.88	1379
10.885	299	10.885	266	10.885	346	10.885	266	10.885	206	10.885	222	10.885	1498	10.885	653	10.885	333	10.885	415	10.885	715	10.885	722	10.885	824	10.885	606	10.885	1229
10.89	315	10.89	161	10.89	284	10.89	309	10.89	234	10.89	145	10.89	1514	10.89	637	10.89	295	10.89	472	10.89	691	10.89	759	10.89	768	10.89	566	10.89	1128
10.895	275	10.895	300	10.895	65	10.895	344	10.895	227	10.895	157	10.895	1496	10.895	664	10.895	243	10.895	426	10.895	631	10.895	864	10.895	864	10.895	565	10.895	1237
10.9	263	10.9	334	10.9	169	10.9	310	10.9	284	10.9	194	10.9	1477	10.9	654	10.9	240	10.9	344	10.9	688	10.9	901	10.9	1003	10.9	563	10.9	1388
10.905	240	10.905	345	10.905	177	10.905	301	10.905	311	10.905	216	10.905	1627	10.905	676	10.905	255	10.905	293	10.905	818	10.905	858	10.905	973	10.905	456	10.905	1616
10.91	242	10.91	340	10.91	193	10.91	168	10.91	241	10.91	248	10.91	2007	10.91	710	10.91	263	10.91	310	10.91	797	10.91	860	10.91	971	10.91	444	10.91	1834
10.915	247	10.915	312	10.915	249	10.915	186	10.915	226	10.915	220	10.915	2365	10.915	821	10.915	264	10.915	349	10.915	856	10.915	817	10.915	1118	10.915	550	10.915	2076
10.92	246	10.92	272	10.92	316	10.92	170	10.92	262	10.92	171	10.92	2598	10.92	998	10.92	286	10.92	421	10.92	1098	10.92	770	10.92	1192	10.92	639	10.92	2153
10.925	256	10.925	293	10.925	343	10.925	110	10.925	120	10.925	168	10.925	2629	10.925	1021	10.925	326	10.925	498	10.925	1179	10.925	864	10.925	1150	10.925	650	10.925	2101
10.93	260	10.93	320	10.93	160	10.93	102	10.93	234	10.93	212	10.93	2594	10.93	995	10.93	324	10.93	426	10.93	1010	10.93	921	10.93	1032	10.93	608	10.93	2137
10.935	228	10.935	265	10.935	327	10.935	119	10.935	254	10.935	236	10.935	2562	10.935	931	10.935	298	10.935	368	10.935	729	10.935	881	10.935	976	10.935	579	10.935	2019
10.94	192	10.94	220	10.94	337	10.94	105	10.94	245	10.94	261	10.94	2300	10.94	775	10.94	309	10.94	418	10.94	643	10.94	852	10.94	1016	10.94	581	10.94	1676
10.945	184	10.945	203	10.945	278	10.945	130	10.945	213	10.945	286	10.945	1912	10.945	778	10.945	344	10.945	410	10.945	740	10.945	805	10.945	1036	10.945	667	10.945	1545
10.95	211	10.95	237	10.95	249	10.95	280	10.95	232	10.95	227	10.95	1739	10.95	846	10.95	352	10.95	347	10.95	780	10.95	842	10.95	1029	10.95	723	10.95	1624
10.955	258	10.955	315	10.955	153	10.955	231	10.955	242	10.955	176	10.955	1829	10.955	809	10.955	344	10.955	393	10.955	698	10.955	969	10.955	1029	10.955	687	10.955	1678
10.96	299	10.96	282	10.96	179	10.96	211	10.96	80	10.96	230	10.96	1922	10.96	782	10.96	317	10.96	441	10.96	652	10.96	1039	10.96	1050	10.96	657	10.96	1781
10.965	313	10.965	207	10.965	178	10.965	189	10.965	245	10.965	323	10.965	1917	10.965	784	10.965	246	10.965	448	10.965	765	10.965	938	10.965	1056	10.965	592	10.965	1769
10.97	335	10.97	237	10.97	178	10.97	195	10.97	121	10.97	328	10.97	1894	10.97	789	10.97	210	10.97	548	10.97	912	10.97	868	10.97	984	10.97	571	10.97	1622
10.975	340	10.975	260	10.975	177	10.975	228	10.975	124	10.975	268	10.975	1877	10.975	762	10.975	238	10.975	587	10.975	955	10.975	832	10.975	957	10.975	560	10.975	1643
10.98	304	10.98	204	10.98	345	10.98	189	10.98	233	10.98	216	10.98	1968	10.98	733	10.98	277	10.98	482	10.98	1000	10.98	790	10.98	1081	10.98	528	10.98	1822
10.985	299	10.985	195	10.985	197	10.985	127	10.985	247	10.985	234	10.985	2205	10.985	826	10.985	299	10.985	469	10.985	1019	10.985	809	10.985	1153	10.985	512	10.985	1958
10.99	341	10.99	297	10.99	214	10.99	162	10.99	241	10.99	311	10.99	2221	10.99	972	10.99	302	10.99	639	10.99	995	10.99	858	10.99	1090	10.99	548	10.99	2016
10.995	352	10.995	381	10.995	316	10.995	231	10.995	227	10.995	302	10.995	2056	10.995	990	10.995	315	10.995	641	10.995	865	10.995	864	10.995	961	10.995	576	10.995	1976
11	372	11	392	11	222	11	259	11	212	11	221	11	1988	11	958	11	429	11	513	11	824	11	823	11	887	11	582	11	1896
11.005	366	11.005	362	11.005	293	11.005	280	11.005	226	11.005	218	11.005	1984	11.005	934	11.005	408	11.005	431	11.005	845	11.005	843	11.005	970	11.005	594	11.005	1915
11.01	241	11.01	278	11.01	330	11.01	273	11.01	171	11.01	241	11.01	2004	11.01	909	11.01	322	11.01	369	11.01	911	11.01	910	11.01	1096	11.01	685	11.01	1996
11.015	265	11.015	236	11.015	228	11.015	190	11.015	97	11.015	253	11.015	2046	11.015	851	11.015	300	11.015	364	11.015	886	11.015	903	11.015	1109	11.015	770	11.015	1947
11.02	285	11.02	273	11.02	220	11.02	153	11.02	134	11.02	275	11.02	2012	11.02	829	11.02	286	11.02	488	11.02	848	11.02	821	11.02	1019	11.02	757	11.02	1976
11.025	240	11.025	336	11.025	176	11.025	200	11.025	220	11.025	280	11.025	1896	11.025	827	11.025	272	11.025	469	11.025	944	11.025	715	11.025	989	11.025	613	11.025	1904
11.03	222	11.03	371	11.03	179	11.03	251	11.03	251	11.03	290	11.03	1797	11.03	786	11.03	230	11.03	461	11.03	1011	11.03	759	11.03	1024	11.03	499	11.03	1742
11.035	312	11.035	166	11.035	312	11.035	293	11.035	273	11.035	290	11.035	1685	11.035	754	11.035	248	11.035	538	11.035	942	11.035	863	11.035	1016	11.035	472	11.035	1665
11.04	381	11.04	205	11.04	319	11.04	276	11.04	176	11.04	244	11.04	1670	11.04	768	11.04	292	11.04	597	11.04	886	11.04	880	11.04	1004	11.04	521	11.04	1587
11.045	393	11.045	240	11.045	171	11.045	201	11.045	337	11.045	182	11.045	2425	11.045	801	11.045	271	11.045	643	11.045	858	11.045	864	11.045	972	11.045	627	11.045	1581
11.05	375	11.05	184	11.05	165	11.05	86	11.05	328	11.05	198	11.05	1691	11.05	770	11.05	264	11.05	499	11.05	732	11.05	870	11.05	887	11.05	627	11.05	1579
11.055	358	11.055	342	11.055	195	11.055	119	11.055	307	11.055	216	11.055	1565	11.055	747	11.055	275	11.055	386	11.055	647	11.055	814	11.055	821	11.055	574	11.055	1404
11.06	320	11.06	341	11.06	204	11.06	137	11.06	276	11.06	217	11.06	1533	11.06	748	11.06	286	11.06	422	11.06	691	11.06	840	11.06	841	11.06	522	11.06	1338
11.065	340	11.065	305	11.065	189	11.065	124	11.065	217	11.065	261	11.065	1641	11.065	784	11.065	263	11.065	408	11.065	700	11.065	905	11.065	853	11.065	512	11.065	1375
11.07	379	11.07	288	11.07	154	11.07	166	11.07	197	11.07	265	11.07	1706	11.07	788	11.07	293	11.07	386	11.07	646	11.07	899	11.07	768	11.07	547	11.07	1329
11.075	339	11.075	332	11.075	284	11.075	124	11.075	241	11.075	197	11.075	1628	11.075	728	11.075	351	11.075	457	11.075	667	11.075	859	11.075	722	11.075	536	11.075	1413
11.08	269	11.08	350	11.08	119	11.08	106	11.08	317	11.08	144	11.08	1433	11.08	720	11.08	327	11.08	520	11.08	739	11.08	801	11.08	774	11.08	496	11.08	1420
11.085	224	11.085	270	11.085	225	11.085	233	11.085	314	11.085	153	11.085	1359	11.085	751	11.085	340	11.085	520	11.085	741	11.085	748	11.085	821	11.085	532	11.085	1333
11.09	224	11.09	212	11.09	151	11.09	129	11.09	223	11.09	176	11.09	1521	11.09	708	11.09	373	11.09	452	11.09	750	11.09	740	11.09	808	11.09	558	11.09	1331
11.095	197	11.095	251	11.095	159	11.095	88	11.095	205	11.095	225	11.095	1854	11.095	740	11.095	329	11.095	432	11.095	898	11.095	612	11.095	824	11.095	466	11.095	1564
11.1	164	11.1	324	11.1	144	11.1	71	11.1	180	11.1	208	11.1	2218	11.1	909	11.1	315	11.1	515	11.1	1023	11.1	693	11.1	1009	11.1	440	11.1	2079
11.105	176	11.105	310	11.105	228	11.105	99	11.105	84	11.105	170	11.105	2472	11.105	1021	11.105	346	11.105	568	11.105	1004	11.105	917	11.105	1277	11.105	551	11.105	2520
11.11	232	11.11	210	11.11	248	11.11	190	11.11	44	11.11	171	11.11	2543	11.11	1016	11.11	333	11.11	618	11.11	1045	11.11	998	11.11	1290	11.11	605	11.11	2381
11.115	252	11.115	222	11.115	282	11.115	201	11.115	138	11.115	189	11.115	2317	11.115	915	11.115	352	11.115	640	11.115	1100	11.115	895	11.115	1165	11.115	578	11.115	1997
11.12	232	11.12	288	11.12	294	11.12	198	11.12	195	11.12	194	11.12	1977	11.12	854	11.12	402	11.12	539	11.12	976	11.12	888	11.12	1078	11.12	674	11.12	1877
11.125	240	11.125	242	11.125	257	11.125	147	11.125	177	11.125	179	11.125	1687	11.125	807	11.125	409	11.125	403	11.125	835	11.125	958	11.125	1024	11.125	796	11.125	1824
11.13	287	11.13	178	11.13	226	11.13	69	11.13	288	11.13	225	11.13	1546	11.13	768	11.13	447	11.13	336	11.13	786	11.13	906	11.13	956	11.13	759	11.13	1599
11.135	314	11.135	235	11.135	265	11.135	112	11.135	290	11.135	211	11.135	1464	11.135	709	11.135	450	11.135	352	11.135	671	11.135	882	11.135	900	11.135	691	11.135	1440
11.14	275	11.14	299	11.14	381	11.14	184	11.14	256	11.14	146	11.14	1442	11.14	701	11.14	416	11.14	370	11.14	650	11.14	972	11.14	814	11.14	701	11.14	1369
11.145	229	11.145	273	11.145	464	11.145	247	11.145	224	11.145	144	11.145	1468	11.145	650	11.145	349	11.145	435	11.145	731	11.145	931	11.145	894	11.145	651	11.145	1312
11.15	177	11.15	241	11.15	363	11.15	259	11.15	114	11.15	165	11.15	1644	11.15	682	11.15	307	11.15	523	11.15	770	11.15	858	11.15	961	11.15	581	11.15	1265
11.155	147	11.155	219	11.155	233	11.155	148	11.155	178	11.155	189	11.155	1780	11.155	862	11.155	305	11.155	404	11.155	767	11.155	928	11.155	832	11.155	583	11.155	1416
11.16	124	11.16	203	11.16	272	11.16	280	11.16	173	11.16	193	11.16	1743	11.16	917	11.16	310	11.16	354	11.16	814	11.16	924	11.16	838	11.16	621	11.16	1575
11.165	150	11.165	213	11.165	381	11.165	268	11.165	193	11.165	203	11.165	1669	11.165	928	11.165	360	11.165	378	11.165	877	11.165	754	11.165	990	11.165	605	11.165	1544
11.17	192	11.17	256	11.17	393	11.17	307	11.17	80	11.17	210	11.17	1717	11.17	922	11.17	383	11.17	336	11.17	859	11.17	753	11.17	1034	11.17	562	11.17	1482
11.175	286	11.175	297	11.175	319	11.175	268	11.175	81	11.175	250	11.175	1878	11.175	921	11.175	356	11.175	345	11.175	827	11.175	938	11.175	1010	11.175	609	11.175	1618
11.18	330	11.18	338	11.18	370	11.18	213	11.18	89	11.18	273	11.18	2031	11.18	881	11.18	314	11.18	440	11.18	862	11.18	956	11.18	1097	11.18	637	11.18	1787
11.185	257	11.185	171	11.185	632	11.185	242	11.185	89	11.185	261	11.185	2264	11.185	892	11.185	251	11.185	522	11.185	1008	11.185	952	11.185	1329	11.185	618	11.185	2083
11.19	207	11.19	168	11.19	514	11.19	268	11.19	266	11.19	205	11.19	2692	11.19	1096	11.19	192	11.19	534	11.19	1312	11.19	1094	11.19	1491	11.19	587	11.19	2560
11.195	269	11.195	234	11.195	563	11.195	210	11.195	252	11.195	203	11.195	3122	11.195	1254	11.195	288	11.195	653	11.195	1422	11.195	1069	11.195	1485	11.195	552	11.195	2905
11.2	288	11.2	271	11.2	812	11.2	231	11.2	96	11.2	231	11.2	3265	11.2	1314	11.2	376	11.2	796	11.2	1296	11.2	1016	11.2	1454	11.2	648	11.2	2962
11.205	231	11.205	323	11.205	885	11.205	330	11.205	94	11.205	267	11.205	3087	11.205	1229	11.205	338	11.205	835	11.205	1161	11.205	1023	11.205	1445	11.205	768	11.205	2748
11.21	264	11.21	364	11.21	701	11.21	388	11.21	207	11.21	283	11.21	2597	11.21	1032	11.21	293	11.21	921	11.21	1077	11.21	1103	11.21	1391	11.21	789	11.21	2427
11.215	291	11.215	387	11.215	528	11.215	330	11.215	172	11.215	215	11.215	2134	11.215	1012	11.215	293	11.215	986	11.215	1017	11.215	1120	11.215	1301	11.215	765	11.215	2115
11.22	203	11.22	376	11.22	341	11.22	246	11.22	173	11.22	127	11.22	1935	11.22	987	11.22	304	11.22	839	11.22	1066	11.22	972	11.22	1273	11.22	806	11.22	1932
11.225	136	11.225	336	11.225	155	11.225	229	11.225	116	11.225	129	11.225	1795	11.225	934	11.225	303	11.225	594	11.225	1042	11.225	924	11.225	1306	11.225	872	11.225	1815
11.23	167	11.23	158	11.23	219	11.23	226	11.23	124	11.23	185	11.23	1724	11.23	897	11.23	327	11.23	471	11.23	958	11.23	977	11.23	1278	11.23	915	11.23	1702
11.235	283	11.235	121	11.235	286	11.235	178	11.235	165	11.235	219	11.235	1744	11.235	872	11.235	354	11.235	526	11.235	953	11.235	952	11.235	1160	11.235	966	11.235	1694
11.24	371	11.24	111	11.24	355	11.24	164	11.24	131	11.24	233	11.24	1798	11.24	858	11.24	373	11.24	534	11.24	1016	11.24	947	11.24	1006	11.24	971	11.24	1758
11.245	358	11.245	127	11.245	321	11.245	225	11.245	200	11.245	229	11.245	1940	11.245	859	11.245	383	11.245	451	11.245	984	11.245	1025	11.245	968	11.245	866	11.245	1734
11.25	374	11.25	312	11.25	272	11.25	224	11.25	293	11.25	237	11.25	2132	11.25	968	11.25	344	11.25	368	11.25	865	11.25	1012	11.25	1010	11.25	767	11.25	1716
11.255	381	11.255	258	11.255	309	11.255	178	11.255	256	11.255	293	11.255	2177	11.255	964	11.255	287	11.255	396	11.255	906	11.255	946	11.255	1090	11.255	808	11.255	1819
11.26	385	11.26	157	11.26	336	11.26	205	11.26	196	11.26	352	11.26	2134	11.26	876	11.26	308	11.26	469	11.26	1005	11.26	888	11.26	1269	11.26	854	11.26	1904
11.265	383	11.265	147	11.265	116	11.265	247	11.265	188	11.265	314	11.265	2127	11.265	854	11.265	275	11.265	509	11.265	1021	11.265	834	11.265	1389	11.265	755	11.265	1896
11.27	320	11.27	126	11.27	95	11.27	126	11.27	178	11.27	234	11.27	2161	11.27	929	11.27	264	11.27	549	11.27	1071	11.27	840	11.27	1296	11.27	623	11.27	1995
11.275	321	11.275	185	11.275	230	11.275	110	11.275	209	11.275	192	11.275	2179	11.275	1049	11.275	333	11.275	522	11.275	1040	11.275	849	11.275	1194	11.275	627	11.275	2013
11.28	362	11.28	205	11.28	240	11.28	93	11.28	274	11.28	192	11.28	2329	11.28	1100	11.28	340	11.28	488	11.28	1052	11.28	857	11.28	1253	11.28	608	11.28	1868
11.285	344	11.285	263	11.285	252	11.285	155	11.285	234	11.285	213	11.285	2656	11.285	1139	11.285	360	11.285	469	11.285	1084	11.285	911	11.285	1357	11.285	600	11.285	2099
11.29	307	11.29	302	11.29	189	11.29	186	11.29	172	11.29	216	11.29	2890	11.29	1150	11.29	391	11.29	411	11.29	1063	11.29	945	11.29	1423	11.29	666	11.29	2719
11.295	291	11.295	332	11.295	176	11.295	218	11.295	149	11.295	177	11.295	3274	11.295	1196	11.295	387	11.295	427	11.295	1083	11.295	932	11.295	1518	11.295	726	11.295	3125
11.3	281	11.3	274	11.3	217	11.3	193	11.3	149	11.3	187	11.3	3609	11.3	1232	11.3	299	11.3	389	11.3	1113	11.3	887	11.3	1461	11.3	709	11.3	3061
11.305	291	11.305	303	11.305	254	11.305	162	11.305	197	11.305	158	11.305	3179	11.305	1169	11.305	235	11.305	416	11.305	1043	11.305	889	11.305	1250	11.305	669	11.305	2631
11.31	336	11.31	380	11.31	271	11.31	288	11.31	234	11.31	117	11.31	2422	11.31	1061	11.31	303	11.31	376	11.31	942	11.31	844	11.31	1082	11.31	655	11.31	2127
11.315	350	11.315	389	11.315	257	11.315	273	11.315	232	11.315	133	11.315	2010	11.315	979	11.315	400	11.315	352	11.315	849	11.315	815	11.315	1019	11.315	676	11.315	1763
11.32	338	11.32	351	11.32	283	11.32	225	11.32	253	11.32	162	11.32	1837	11.32	916	11.32	448	11.32	403	11.32	766	11.32	878	11.32	906	11.32	725	11.32	1613
11.325	312	11.325	333	11.325	293	11.325	227	11.325	280	11.325	162	11.325	1890	11.325	976	11.325	493	11.325	435	11.325	752	11.325	843	11.325	947	11.325	725	11.325	1618
11.33	291	11.33	371	11.33	292	11.33	241	11.33	277	11.33	164	11.33	1995	11.33	996	11.33	477	11.33	394	11.33	888	11.33	751	11.33	1080	11.33	749	11.33	1677
11.335	292	11.335	392	11.335	289	11.335	244	11.335	257	11.335	133	11.335	1903	11.335	977	11.335	429	11.335	357	11.335	987	11.335	791	11.335	1189	11.335	786	11.335	1724
11.34	328	11.34	351	11.34	131	11.34	188	11.34	215	11.34	101	11.34	1963	11.34	934	11.34	392	11.34	400	11.34	872	11.34	876	11.34	1288	11.34	781	11.34	1865
11.345	309	11.345	338	11.345	125	11.345	87	11.345	217	11.345	109	11.345	2021	11.345	969	11.345	366	11.345	442	11.345	911	11.345	886	11.345	1233	11.345	780	11.345	1936
11.35	328	11.35	371	11.35	325	11.35	135	11.35	229	11.35	71	11.35	1886	11.35	1037	11.35	330	11.35	381	11.35	998	11.35	868	11.35	1194	11.35	774	11.35	1910
11.355	426	11.355	361	11.355	414	11.355	199	11.355	204	11.355	100	11.355	1801	11.355	910	11.355	361	11.355	361	11.355	911	11.355	888	11.355	1216	11.355	724	11.355	1796
11.36	446	11.36	290	11.36	371	11.36	333	11.36	211	11.36	174	11.36	1701	11.36	816	11.36	384	11.36	381	11.36	784	11.36	968	11.36	1120	11.36	649	11.36	1658
11.365	400	11.365	214	11.365	349	11.365	250	11.365	247	11.365	155	11.365	1644	11.365	824	11.365	350	11.365	427	11.365	822	11.365	958	11.365	1070	11.365	599	11.365	1563
11.37	360	11.37	281	11.37	227	11.37	122	11.37	200	11.37	129	11.37	1616	11.37	894	11.37	315	11.37	477	11.37	977	11.37	885	11.37	1087	11.37	616	11.37	1524
11.375	343	11.375	371	11.375	176	11.375	152	11.375	205	11.375	142	11.375	1621	11.375	781	11.375	333	11.375	505	11.375	1049	11.375	896	11.375	1035	11.375	637	11.375	1598
11.38	303	11.38	256	11.38	291	11.38	155	11.38	280	11.38	158	11.38	1706	11.38	748	11.38	371	11.38	504	11.38	1035	11.38	931	11.38	1024	11.38	590	11.38	1633
11.385	261	11.385	272	11.385	97	11.385	97	11.385	306	11.385	158	11.385	1819	11.385	805	11.385	389	11.385	478	11.385	963	11.385	874	11.385	1049	11.385	562	11.385	1496
11.39	202	11.39	380	11.39	325	11.39	123	11.39	304	11.39	221	11.39	1907	11.39	863	11.39	420	11.39	399	11.39	880	11.39	823	11.39	1019	11.39	588	11.39	1451
11.395	232	11.395	380	11.395	335	11.395	323	11.395	290	11.395	271	11.395	1914	11.395	848	11.395	371	11.395	378	11.395	832	11.395	927	11.395	947	11.395	638	11.395	1597
11.4	333	11.4	368	11.4	296	11.4	267	11.4	314	11.4	229	11.4	1928	11.4	842	11.4	293	11.4	414	11.4	815	11.4	934	11.4	951	11.4	688	11.4	1634
11.405	328	11.405	305	11.405	246	11.405	222	11.405	286	11.405	192	11.405	2098	11.405	921	11.405	290	11.405	355	11.405	1035	11.405	830	11.405	1128	11.405	739	11.405	1743
11.41	284	11.41	328	11.41	218	11.41	275	11.41	216	11.41	184	11.41	2808	11.41	1080	11.41	421	11.41	347	11.41	1548	11.41	966	11.41	1581	11.41	767	11.41	2487
11.415	264	11.415	387	11.415	258	11.415	281	11.415	177	11.415	155	11.415	5175	11.415	1497	11.415	599	11.415	520	11.415	2278	11.415	1135	11.415	2468	11.415	813	11.415	4520
11.42	236	11.42	398	11.42	309	11.42	124	11.42	167	11.42	133	11.42	9298	11.42	2197	11.42	656	11.42	577	11.42	3113	11.42	1216	11.42	3670	11.42	979	11.42	7958
11.425	211	11.425	368	11.425	322	11.425	234	11.425	245	11.425	138	11.425	13284	11.425	2891	11.425	729	11.425	480	11.425	3736	11.425	1332	11.425	4757	11.425	1200	11.425	11236
11.43	185	11.43	318	11.43	304	11.43	150	11.43	262	11.43	131	11.43	14803	11.43	3299	11.43	611	11.43	517	11.43	3566	11.43	1294	11.43	5173	11.43	1251	11.43	12277
11.435	202	11.435	146	11.435	312	11.435	145	11.435	202	11.435	134	11.435	12771	11.435	3142	11.435	392	11.435	451	11.435	2688	11.435	1246	11.435	4428	11.435	1205	11.435	10777
11.44	217	11.44	361	11.44	353	11.44	130	11.44	178	11.44	208	11.44	8553	11.44	2364	11.44	369	11.44	387	11.44	1749	11.44	1154	11.44	3007	11.44	1028	11.44	7568
11.445	172	11.445	303	11.445	332	11.445	116	11.445	204	11.445	251	11.445	4755	11.445	1462	11.445	354	11.445	323	11.445	1154	11.445	1041	11.445	1901	11.445	842	11.445	4371
11.45	198	11.45	295	11.45	308	11.45	189	11.45	206	11.45	208	11.45	2782	11.45	1054	11.45	372	11.45	344	11.45	879	11.45	1036	11.45	1298	11.45	810	11.45	2476
11.455	213	11.455	280	11.455	336	11.455	312	11.455	150	11.455	213	11.455	2130	11.455	1025	11.455	396	11.455	369	11.455	798	11.455	1015	11.455	1076	11.455	807	11.455	1668
11.46	259	11.46	265	11.46	181	11.46	326	11.46	138	11.46	224	11.46	1824	11.46	955	11.46	379	11.46	461	11.46	840	11.46	967	11.46	992	11.46	775	11.46	1518
11.465	218	11.465	130	11.465	173	11.465	226	11.465	144	11.465	210	11.465	1744	11.465	938	11.465	380	11.465	502	11.465	883	11.465	934	11.465	922	11.465	831	11.465	1658
11.47	163	11.47	146	11.47	318	11.47	171	11.47	121	11.47	171	11.47	1776	11.47	856	11.47	354	11.47	420	11.47	833	11.47	922	11.47	996	11.47	955	11.47	1589
11.475	180	11.475	288	11.475	268	11.475	44	11.475	109	11.475	144	11.475	1770	11.475	857	11.475	317	11.475	432	11.475	797	11.475	977	11.475	1144	11.475	927	11.475	1433
11.48	166	11.48	247	11.48	249	11.48	195	11.48	120	11.48	197	11.48	1830	11.48	894	11.48	360	11.48	465	11.48	824	11.48	989	11.48	1156	11.48	784	11.48	1426
11.485	210	11.485	244	11.485	273	11.485	247	11.485	130	11.485	177	11.485	1841	11.485	850	11.485	448	11.485	491	11.485	819	11.485	969	11.485	1113	11.485	755	11.485	1446
11.49	270	11.49	310	11.49	278	11.49	202	11.49	195	11.49	176	11.49	1793	11.49	784	11.49	402	11.49	491	11.49	804	11.49	954	11.49	1175	11.49	815	11.49	1554
11.495	296	11.495	308	11.495	290	11.495	98	11.495	255	11.495	203	11.495	1902	11.495	864	11.495	377	11.495	455	11.495	811	11.495	910	11.495	1136	11.495	811	11.495	1595
11.5	320	11.5	313	11.5	295	11.5	85	11.5	216	11.5	221	11.5	1917	11.5	947	11.5	341	11.5	435	11.5	803	11.5	874	11.5	978	11.5	744	11.5	1562
11.505	255	11.505	350	11.505	324	11.505	130	11.505	109	11.505	234	11.505	1801	11.505	920	11.505	371	11.505	469	11.505	741	11.505	941	11.505	850	11.505	675	11.505	1527
11.51	208	11.51	328	11.51	313	11.51	158	11.51	136	11.51	229	11.51	1843	11.51	942	11.51	448	11.51	422	11.51	738	11.51	990	11.51	824	11.51	689	11.51	1598
11.515	200	11.515	295	11.515	279	11.515	174	11.515	130	11.515	219	11.515	2639	11.515	1023	11.515	397	11.515	321	11.515	854	11.515	1014	11.515	865	11.515	726	11.515	1733
11.52	232	11.52	267	11.52	274	11.52	112	11.52	253	11.52	181	11.52	2716	11.52	900	11.52	273	11.52	270	11.52	867	11.52	1018	11.52	901	11.52	709	11.52	1688
11.525	252	11.525	208	11.525	227	11.525	97	11.525	262	11.525	133	11.525	1953	11.525	834	11.525	266	11.525	296	11.525	808	11.525	968	11.525	928	11.525	672	11.525	1592
11.53	190	11.53	168	11.53	173	11.53	100	11.53	274	11.53	111	11.53	2009	11.53	817	11.53	347	11.53	346	11.53	770	11.53	888	11.53	1088	11.53	592	11.53	1683
11.535	184	11.535	210	11.535	191	11.535	134	11.535	250	11.535	80	11.535	1907	11.535	824	11.535	375	11.535	355	11.535	836	11.535	900	11.535	1159	11.535	560	11.535	1758
11.54	234	11.54	190	11.54	285	11.54	168	11.54	198	11.54	125	11.54	1672	11.54	837	11.54	319	11.54	352	11.54	914	11.54	967	11.54	1106	11.54	640	11.54	1689
11.545	242	11.545	217	11.545	338	11.545	338	11.545	229	11.545	143	11.545	1675	11.545	859	11.545	287	11.545	403	11.545	998	11.545	943	11.545	1080	11.545	654	11.545	1573
11.55	304	11.55	131	11.55	289	11.55	155	11.55	261	11.55	181	11.55	1919	11.55	909	11.55	331	11.55	425	11.55	968	11.55	820	11.55	1022	11.55	642	11.55	1529
11.555	352	11.555	86	11.555	269	11.555	138	11.555	255	11.555	208	11.555	1967	11.555	810	11.555	388	11.555	408	11.555	880	11.555	816	11.555	969	11.555	608	11.555	1559
11.56	1379	11.56	304	11.56	344	11.56	297	11.56	311	11.56	147	11.56	1798	11.56	808	11.56	386	11.56	1228	11.56	841	11.56	840	11.56	1008	11.56	666	11.56	1682
11.565	2292	11.565	427	11.565	168	11.565	421	11.565	357	11.565	1288	11.565	1750	11.565	833	11.565	360	11.565	1821	11.565	877	11.565	895	11.565	1034	11.565	729	11.565	1821
11.57	3022	11.57	455	11.57	767	11.57	559	11.57	364	11.57	2083	11.57	1812	11.57	938	11.57	337	11.57	2959	11.57	853	11.57	917	11.57	995	11.57	748	11.57	1880
11.575	312	11.575	443	11.575	912	11.575	618	11.575	152	11.575	2490	11.575	1884	11.575	1084	11.575	378	11.575	4464	11.575	786	11.575	951	11.575	1010	11.575	765	11.575	1942
11.58	368	11.58	468	11.58	955	11.58	564	11.58	164	11.58	2241	11.58	1890	11.58	1064	11.58	397	11.58	5364	11.58	808	11.58	1014	11.58	1123	11.58	708	11.58	2061
11.585	316	11.585	505	11.585	812	11.585	156	11.585	509	11.585	1576	11.585	1868	11.585	955	11.585	421	11.585	4842	11.585	917	11.585	1065	11.585	1062	11.585	658	11.585	2085
11.59	299	11.59	434	11.59	597	11.59	227	11.59	381	11.59	996	11.59	1962	11.59	861	11.59	450	11.59	3569	11.59	893	11.59	1032	11.59	893	11.59	696	11.59	1800
11.595	240	11.595	354	11.595	459	11.595	332	11.595	282	11.595	206	11.595	2100	11.595	801	11.595	442	11.595	2398	11.595	898	11.595	885	11.595	958	11.595	816	11.595	1588
11.6	199	11.6	206	11.6	416	11.6	294	11.6	283	11.6	231	11.6	2117	11.6	898	11.6	392	11.6	1605	11.6	950	11.6	870	11.6	1156	11.6	789	11.6	1658
11.605	238	11.605	196	11.605	448	11.605	285	11.605	154	11.605	205	11.605	1977	11.605	1008	11.605	408	11.605	342	11.605	946	11.605	1015	11.605	1149	11.605	702	11.605	1701
11.61	266	11.61	179	11.61	421	11.61	219	11.61	119	11.61	208	11.61	1889	11.61	891	11.61	1170	11.61	431	11.61	928	11.61	1097	11.61	1053	11.61	731	11.61	1691
11.615	328	11.615	342	11.615	366	11.615	148	11.615	225	11.615	227	11.615	1855	11.615	764	11.615	411	11.615	483	11.615	911	11.615	1050	11.615	1003	11.615	693	11.615	1832
11.62	347	11.62	166	11.62	357	11.62	134	11.62	239	11.62	309	11.62	1728	11.62	802	11.62	397	11.62	494	11.62	941	11.62	882	11.62	981	11.62	650	11.62	1956
11.625	215	11.625	172	11.625	177	11.625	168	11.625	296	11.625	400	11.625	1700	11.625	868	11.625	411	11.625	1379	11.625	977	11.625	826	11.625	996	11.625	590	11.625	1918
11.63	132	11.63	173	11.63	357	11.63	230	11.63	139	11.63	371	11.63	1852	11.63	875	11.63	468	11.63	1440	11.63	938	11.63	956	11.63	933	11.63	601	11.63	1745
11.635	270	11.635	194	11.635	326	11.635	158	11.635	164	11.635	240	11.635	1925	11.635	872	11.635	503	11.635	527	11.635	877	11.635	985	11.635	907	11.635	686	11.635	1534
11.64	333	11.64	202	11.64	336	11.64	250	11.64	160	11.64	184	11.64	1887	11.64	911	11.64	440	11.64	530	11.64	757	11.64	970	11.64	1070	11.64	745	11.64	1555
11.645	357	11.645	131	11.645	331	11.645	293	11.645	123	11.645	165	11.645	1868	11.645	897	11.645	407	11.645	474	11.645	824	11.645	924	11.645	1207	11.645	733	11.645	1717
11.65	393	11.65	89	11.65	297	11.65	273	11.65	177	11.65	210	11.65	1954	11.65	898	11.65	397	11.65	458	11.65	1044	11.65	851	11.65	1247	11.65	754	11.65	1833
11.655	328	11.655	268	11.655	304	11.655	146	11.655	180	11.655	219	11.655	2086	11.655	952	11.655	363	11.655	477	11.655	1038	11.655	883	11.655	1128	11.655	711	11.655	1882
11.66	272	11.66	111	11.66	309	11.66	337	11.66	188	11.66	228	11.66	2199	11.66	994	11.66	366	11.66	448	11.66	954	11.66	1002	11.66	1067	11.66	628	11.66	1852
11.665	358	11.665	123	11.665	247	11.665	347	11.665	222	11.665	237	11.665	2220	11.665	961	11.665	405	11.665	444	11.665	913	11.665	1066	11.665	1060	11.665	605	11.665	1757
11.67	312	11.67	158	11.67	289	11.67	278	11.67	265	11.67	229	11.67	2024	11.67	889	11.67	423	11.67	485	11.67	923	11.67	1101	11.67	1104	11.67	707	11.67	1784
11.675	262	11.675	341	11.675	371	11.675	235	11.675	296	11.675	216	11.675	1894	11.675	962	11.675	426	11.675	391	11.675	938	11.675	1073	11.675	1110	11.675	836	11.675	1920
11.68	291	11.68	192	11.68	352	11.68	174	11.68	261	11.68	217	11.68	1979	11.68	1149	11.68	423	11.68	294	11.68	952	11.68	1023	11.68	1157	11.68	869	11.68	1883
11.685	325	11.685	235	11.685	326	11.685	155	11.685	186	11.685	205	11.685	2157	11.685	1216	11.685	464	11.685	340	11.685	1019	11.685	1085	11.685	1252	11.685	810	11.685	1828
11.69	331	11.69	174	11.69	272	11.69	215	11.69	196	11.69	157	11.69	2347	11.69	1112	11.69	428	11.69	483	11.69	1062	11.69	1299	11.69	1291	11.69	836	11.69	1976
11.695	296	11.695	216	11.695	104	11.695	226	11.695	233	11.695	157	11.695	2400	11.695	1126	11.695	365	11.695	488	11.695	1023	11.695	1374	11.695	1235	11.695	802	11.695	2126
11.7	260	11.7	226	11.7	269	11.7	295	11.7	217	11.7	181	11.7	2293	11.7	1186	11.7	364	11.7	381	11.7	1040	11.7	1213	11.7	1126	11.7	805	11.7	2073
11.705	242	11.705	184	11.705	344	11.705	179	11.705	185	11.705	139	11.705	2109	11.705	1104	11.705	333	11.705	355	11.705	1092	11.705	1096	11.705	1001	11.705	819	11.705	1980
11.71	231	11.71	128	11.71	373	11.71	229	11.71	167	11.71	128	11.71	2096	11.71	998	11.71	352	11.71	360	11.71	1065	11.71	1031	11.71	1113	11.71	744	11.71	2028
11.715	232	11.715	115	11.715	153	11.715	195	11.715	173	11.715	185	11.715	2213	11.715	980	11.715	371	11.715	466	11.715	1006	11.715	1007	11.715	1253	11.715	671	11.715	2053
11.72	239	11.72	132	11.72	154	11.72	163	11.72	57	11.72	160	11.72	2286	11.72	1010	11.72	312	11.72	691	11.72	964	11.72	1006	11.72	1230	11.72	717	11.72	2124
11.725	242	11.725	122	11.725	260	11.725	184	11.725	63	11.725	185	11.725	2274	11.725	993	11.725	292	11.725	757	11.725	907	11.725	967	11.725	1176	11.725	785	11.725	2225
11.73	260	11.73	147	11.73	303	11.73	270	11.73	249	11.73	269	11.73	2077	11.73	997	11.73	331	11.73	716	11.73	866	11.73	1061	11.73	1173	11.73	730	11.73	2140
11.735	202	11.735	187	11.735	352	11.735	265	11.735	277	11.735	322	11.735	1849	11.735	995	11.735	342	11.735	665	11.735	810	11.735	1169	11.735	1257	11.735	694	11.735	1929
11.74	226	11.74	166	11.74	315	11.74	241	11.74	312	11.74	290	11.74	1840	11.74	1002	11.74	359	11.74	502	11.74	859	11.74	1085	11.74	1341	11.74	746	11.74	1762
11.745	234	11.745	157	11.745	171	11.745	206	11.745	331	11.745	238	11.745	1923	11.745	1013	11.745	372	11.745	352	11.745	811	11.745	990	11.745	1347	11.745	772	11.745	1853
11.75	243	11.75	210	11.75	359	11.75	214	11.75	313	11.75	212	11.75	1981	11.75	1011	11.75	338	11.75	362	11.75	811	11.75	988	11.75	1397	11.75	757	11.75	1913
11.755	285	11.755	456	11.755	423	11.755	273	11.755	297	11.755	197	11.755	2038	11.755	1011	11.755	308	11.755	376	11.755	950	11.755	1019	11.755	1336	11.755	723	11.755	1729
11.76	278	11.76	411	11.76	386	11.76	276	11.76	271	11.76	167	11.76	1927	11.76	1063	11.76	322	11.76	469	11.76	1026	11.76	1103	11.76	1114	11.76	718	11.76	1557
11.765	176	11.765	217	11.765	293	11.765	164	11.765	238	11.765	166	11.765	1865	11.765	1041	11.765	338	11.765	579	11.765	974	11.765	1189	11.765	1010	11.765	674	11.765	1513
11.77	142	11.77	203	11.77	282	11.77	178	11.77	192	11.77	186	11.77	2006	11.77	954	11.77	342	11.77	530	11.77	976	11.77	1135	11.77	1031	11.77	678	11.77	1643
11.775	152	11.775	244	11.775	316	11.775	301	11.775	176	11.775	168	11.775	1882	11.775	949	11.775	342	11.775	404	11.775	934	11.775	976	11.775	1053	11.775	786	11.775	1793
11.78	173	11.78	176	11.78	342	11.78	258	11.78	219	11.78	179	11.78	1852	11.78	948	11.78	355	11.78	363	11.78	853	11.78	904	11.78	1002	11.78	811	11.78	1860
11.785	194	11.785	287	11.785	334	11.785	200	11.785	278	11.785	248	11.785	2055	11.785	858	11.785	433	11.785	337	11.785	840	11.785	880	11.785	974	11.785	802	11.785	1870
11.79	230	11.79	318	11.79	369	11.79	242	11.79	312	11.79	256	11.79	1980	11.79	734	11.79	448	11.79	367	11.79	851	11.79	926	11.79	962	11.79	730	11.79	1793
11.795	219	11.795	403	11.795	167	11.795	279	11.795	294	11.795	255	11.795	1812	11.795	811	11.795	345	11.795	397	11.795	878	11.795	1087	11.795	928	11.795	654	11.795	1743
11.8	180	11.8	414	11.8	139	11.8	277	11.8	230	11.8	194	11.8	1872	11.8	970	11.8	288	11.8	346	11.8	950	11.8	1172	11.8	931	11.8	705	11.8	1858
11.805	194	11.805	146	11.805	281	11.805	236	11.805	241	11.805	132	11.805	1920	11.805	938	11.805	312	11.805	376	11.805	940	11.805	1134	11.805	950	11.805	711	11.805	1845
11.81	216	11.81	309	11.81	317	11.81	143	11.81	298	11.81	142	11.81	1796	11.81	853	11.81	322	11.81	490	11.81	872	11.81	1022	11.81	934	11.81	646	11.81	1652
11.815	139	11.815	311	11.815	299	11.815	160	11.815	140	11.815	172	11.815	1728	11.815	855	11.815	326	11.815	458	11.815	848	11.815	972	11.815	917	11.815	645	11.815	1551
11.82	73	11.82	348	11.82	113	11.82	147	11.82	135	11.82	180	11.82	1809	11.82	917	11.82	374	11.82	355	11.82	888	11.82	1015	11.82	959	11.82	668	11.82	1563
11.825	102	11.825	334	11.825	89	11.825	184	11.825	125	11.825	162	11.825	1894	11.825	886	11.825	420	11.825	288	11.825	867	11.825	1103	11.825	1004	11.825	720	11.825	1686
11.83	221	11.83	284	11.83	234	11.83	271	11.83	240	11.83	155	11.83	1874	11.83	907	11.83	435	11.83	331	11.83	837	11.83	1146	11.83	1006	11.83	775	11.83	1649
11.835	304	11.835	166	11.835	281	11.835	228	11.835	250	11.835	142	11.835	1975	11.835	1000	11.835	400	11.835	447	11.835	898	11.835	1087	11.835	1086	11.835	739	11.835	1542
11.84	221	11.84	286	11.84	318	11.84	132	11.84	112	11.84	151	11.84	2131	11.84	990	11.84	374	11.84	547	11.84	944	11.84	1111	11.84	1160	11.84	749	11.84	1701
11.845	224	11.845	272	11.845	277	11.845	124	11.845	346	11.845	177	11.845	2131	11.845	982	11.845	338	11.845	567	11.845	1043	11.845	1094	11.845	1161	11.845	816	11.845	1824
11.85	317	11.85	286	11.85	262	11.85	228	11.85	280	11.85	184	11.85	2143	11.85	1001	11.85	337	11.85	475	11.85	1040	11.85	1022	11.85	1100	11.85	740	11.85	1817
11.855	285	11.855	302	11.855	297	11.855	268	11.855	209	11.855	217	11.855	2206	11.855	954	11.855	399	11.855	384	11.855	926	11.855	996	11.855	1066	11.855	628	11.855	1801
11.86	277	11.86	150	11.86	329	11.86	157	11.86	214	11.86	224	11.86	2183	11.86	895	11.86	376	11.86	337	11.86	941	11.86	1041	11.86	997	11.86	563	11.86	1894
11.865	276	11.865	295	11.865	232	11.865	160	11.865	214	11.865	221	11.865	2069	11.865	945	11.865	347	11.865	354	11.865	1066	11.865	1070	11.865	974	11.865	587	11.865	1913
11.87	312	11.87	311	11.87	302	11.87	343	11.87	234	11.87	267	11.87	2013	11.87	1013	11.87	415	11.87	386	11.87	1101	11.87	983	11.87	1064	11.87	664	11.87	1912
11.875	314	11.875	345	11.875	323	11.875	404	11.875	285	11.875	285	11.875	1918	11.875	954	11.875	437	11.875	400	11.875	1056	11.875	933	11.875	1090	11.875	709	11.875	1903
11.88	247	11.88	330	11.88	320	11.88	401	11.88	270	11.88	196	11.88	1880	11.88	903	11.88	433	11.88	381	11.88	960	11.88	963	11.88	1071	11.88	690	11.88	1824
11.885	188	11.885	173	11.885	277	11.885	299	11.885	213	11.885	162	11.885	2026	11.885	1019	11.885	395	11.885	382	11.885	828	11.885	988	11.885	1077	11.885	760	11.885	1769
11.89	247	11.89	168	11.89	244	11.89	233	11.89	177	11.89	233	11.89	2048	11.89	1075	11.89	416	11.89	399	11.89	784	11.89	986	11.89	1088	11.89	830	11.89	1785
11.895	323	11.895	145	11.895	336	11.895	228	11.895	182	11.895	242	11.895	1987	11.895	938	11.895	430	11.895	443	11.895	893	11.895	961	11.895	1120	11.895	828	11.895	1713
11.9	311	11.9	231	11.9	401	11.9	208	11.9	189	11.9	176	11.9	2059	11.9	937	11.9	363	11.9	500	11.9	922	11.9	1039	11.9	1165	11.9	734	11.9	1727
11.905	253	11.905	373	11.905	336	11.905	205	11.905	185	11.905	200	11.905	2213	11.905	1005	11.905	354	11.905	474	11.905	894	11.905	1159	11.905	1109	11.905	680	11.905	1889
11.91	232	11.91	364	11.91	315	11.91	216	11.91	212	11.91	291	11.91	2234	11.91	1075	11.91	425	11.91	432	11.91	991	11.91	1152	11.91	1122	11.91	634	11.91	1893
11.915	242	11.915	363	11.915	359	11.915	181	11.915	218	11.915	270	11.915	2234	11.915	1094	11.915	509	11.915	528	11.915	990	11.915	1067	11.915	1202	11.915	592	11.915	1779
11.92	230	11.92	342	11.92	313	11.92	221	11.92	214	11.92	206	11.92	2362	11.92	1104	11.92	570	11.92	518	11.92	862	11.92	1014	11.92	1197	11.92	576	11.92	1814
11.925	240	11.925	284	11.925	148	11.925	226	11.925	154	11.925	169	11.925	2331	11.925	1069	11.925	509	11.925	2116	11.925	794	11.925	1055	11.925	1158	11.925	582	11.925	1856
11.93	216	11.93	141	11.93	149	11.93	252	11.93	136	11.93	206	11.93	2163	11.93	1019	11.93	371	11.93	2057	11.93	837	11.93	1122	11.93	1176	11.93	625	11.93	1718
11.935	259	11.935	150	11.935	159	11.935	283	11.935	295	11.935	227	11.935	1991	11.935	1043	11.935	325	11.935	405	11.935	941	11.935	1025	11.935	1202	11.935	669	11.935	1605
11.94	313	11.94	287	11.94	144	11.94	266	11.94	251	11.94	213	11.94	1896	11.94	1094	11.94	338	11.94	485	11.94	907	11.94	951	11.94	1187	11.94	686	11.94	1647
11.945	288	11.945	279	11.945	154	11.945	208	11.945	179	11.945	208	11.945	2016	11.945	1078	11.945	424	11.945	523	11.945	834	11.945	993	11.945	1193	11.945	741	11.945	1780
11.95	280	11.95	262	11.95	171	11.95	178	11.95	109	11.95	245	11.95	2139	11.95	1061	11.95	421	11.95	462	11.95	916	11.95	1055	11.95	1219	11.95	773	11.95	1889
11.955	284	11.955	294	11.955	187	11.955	162	11.955	214	11.955	241	11.955	2064	11.955	1080	11.955	387	11.955	355	11.955	1056	11.955	1160	11.955	1267	11.955	776	11.955	1929
11.96	283	11.96	323	11.96	229	11.96	209	11.96	240	11.96	266	11.96	2050	11.96	1120	11.96	315	11.96	312	11.96	1119	11.96	1188	11.96	1216	11.96	795	11.96	1952
11.965	402	11.965	268	11.965	404	11.965	291	11.965	256	11.965	361	11.965	2114	11.965	1110	11.965	280	11.965	319	11.965	1053	11.965	1059	11.965	1032	11.965	803	11.965	1943
11.97	642	11.97	237	11.97	216	11.97	323	11.97	248	11.97	402	11.97	2096	11.97	1162	11.97	354	11.97	370	11.97	945	11.97	1022	11.97	992	11.97	825	11.97	1844
11.975	826	11.975	310	11.975	202	11.975	332	11.975	243	11.975	490	11.975	2056	11.975	1141	11.975	429	11.975	1313	11.975	810	11.975	1030	11.975	1081	11.975	886	11.975	1689
11.98	918	11.98	164	11.98	190	11.98	261	11.98	128	11.98	681	11.98	1965	11.98	968	11.98	447	11.98	1739	11.98	779	11.98	1039	11.98	1177	11.98	934	11.98	1712
11.985	850	11.985	370	11.985	281	11.985	252	11.985	142	11.985	762	11.985	1942	11.985	1031	11.985	523	11.985	2425	11.985	893	11.985	1121	11.985	1199	11.985	931	11.985	1818
11.99	704	11.99	401	11.99	287	11.99	325	11.99	83	11.99	696	11.99	2096	11.99	1263	11.99	592	11.99	2797	11.99	945	11.99	1289	11.99	1272	11.99	907	11.99	1928
11.995	573	11.995	398	11.995	330	11.995	293	11.995	87	11.995	579	11.995	2391	11.995	1549	11.995	722	11.995	2389	11.995	1063	11.995	1580	11.995	1585	11.995	1046	11.995	2382
12	357	12	325	12	335	12	293	12	217	12	428	12	2925	12	2028	12	1156	12	866	12	1494	12	1953	12	2053	12	1520	12	3243
12.005	275	12.005	270	12.005	234	12.005	350	12.005	229	12.005	261	12.005	3656	12.005	2669	12.005	1468	12.005	512	12.005	1944	12.005	2229	12.005	2504	12.005	1991	12.005	4196
12.01	309	12.01	274	12.01	248	12.01	316	12.01	235	12.01	202	12.01	3944	12.01	3014	12.01	1314	12.01	376	12.01	2009	12.01	2347	12.01	2755	12.01	2300	12.01	4700
12.015	339	12.015	286	12.015	360	12.015	272	12.015	268	12.015	277	12.015	3483	12.015	2839	12.015	864	12.015	438	12.015	1706	12.015	2054	12.015	2549	12.015	2211	12.015	4224
12.02	359	12.02	266	12.02	341	12.02	276	12.02	283	12.02	231	12.02	2852	12.02	2147	12.02	643	12.02	496	12.02	1376	12.02	1573	12.02	1919	12.02	1688	12.02	3163
12.025	347	12.025	290	12.025	371	12.025	283	12.025	213	12.025	202	12.025	2470	12.025	1434	12.025	568	12.025	448	12.025	1158	12.025	1188	12.025	1488	12.025	1126	12.025	2413
12.03	358	12.03	365	12.03	411	12.03	315	12.03	81	12.03	209	12.03	2200	12.03	1091	12.03	515	12.03	443	12.03	1067	12.03	1150	12.03	1326	12.03	983	12.03	2135
12.035	303	12.035	250	12.035	396	12.035	325	12.035	153	12.035	240	12.035	1985	12.035	1035	12.035	511	12.035	448	12.035	1048	12.035	1319	12.035	1266	12.035	924	12.035	2070
12.04	264	12.04	210	12.04	334	12.04	269	12.04	219	12.04	210	12.04	1907	12.04	1099	12.04	472	12.04	435	12.04	1104	12.04	1271	12.04	1168	12.04	888	12.04	2030
12.045	258	12.045	164	12.045	294	12.045	219	12.045	305	12.045	163	12.045	1982	12.045	1070	12.045	376	12.045	405	12.045	1100	12.045	1134	12.045	1032	12.045	783	12.045	1938
12.05	221	12.05	174	12.05	317	12.05	277	12.05	327	12.05	156	12.05	2132	12.05	964	12.05	339	12.05	417	12.05	969	12.05	1103	12.05	1087	12.05	720	12.05	1890
12.055	202	12.055	392	12.055	334	12.055	385	12.055	317	12.055	195	12.055	2242	12.055	950	12.055	378	12.055	440	12.055	808	12.055	1012	12.055	1263	12.055	814	12.055	1837
12.06	269	12.06	216	12.06	297	12.06	355	12.06	347	12.06	219	12.06	2285	12.06	1003	12.06	445	12.06	487	12.06	792	12.06	1059	12.06	1232	12.06	942	12.06	1889
12.065	287	12.065	194	12.065	147	12.065	284	12.065	208	12.065	226	12.065	2203	12.065	1018	12.065	480	12.065	469	12.065	883	12.065	1151	12.065	1112	12.065	1029	12.065	1966
12.07	237	12.07	300	12.07	342	12.07	243	12.07	143	12.07	207	12.07	1953	12.07	986	12.07	474	12.07	365	12.07	1000	12.07	1058	12.07	1174	12.07	978	12.07	1883
12.075	250	12.075	275	12.075	257	12.075	225	12.075	209	12.075	150	12.075	1835	12.075	958	12.075	494	12.075	350	12.075	1079	12.075	980	12.075	1259	12.075	784	12.075	1894
12.08	268	12.08	136	12.08	144	12.08	239	12.08	171	12.08	145	12.08	1846	12.08	968	12.08	491	12.08	379	12.08	1056	12.08	1074	12.08	1262	12.08	707	12.08	1937
12.085	277	12.085	102	12.085	323	12.085	258	12.085	115	12.085	177	12.085	1872	12.085	1066	12.085	405	12.085	389	12.085	1045	12.085	1185	12.085	1212	12.085	816	12.085	1799
12.09	313	12.09	254	12.09	353	12.09	301	12.09	113	12.09	168	12.09	1974	12.09	1163	12.09	459	12.09	392	12.09	1011	12.09	1189	12.09	1144	12.09	832	12.09	1734
12.095	343	12.095	274	12.095	351	12.095	328	12.095	128	12.095	158	12.095	2063	12.095	1136	12.095	504	12.095	447	12.095	907	12.095	1112	12.095	1200	12.095	764	12.095	1873
12.1	300	12.1	286	12.1	351	12.1	228	12.1	229	12.1	173	12.1	2101	12.1	1143	12.1	497	12.1	460	12.1	914	12.1	1140	12.1	1387	12.1	842	12.1	2077
12.105	328	12.105	349	12.105	338	12.105	333	12.105	245	12.105	136	12.105	2154	12.105	1247	12.105	522	12.105	403	12.105	1051	12.105	1158	12.105	1368	12.105	894	12.105	2113
12.11	397	12.11	380	12.11	342	12.11	366	12.11	255	12.11	160	12.11	2238	12.11	1293	12.11	534	12.11	405	12.11	1090	12.11	1161	12.11	1157	12.11	838	12.11	2052
12.115	375	12.115	146	12.115	348	12.115	214	12.115	271	12.115	331	12.115	2248	12.115	1154	12.115	487	12.115	459	12.115	1072	12.115	1223	12.115	1123	12.115	777	12.115	1964
12.12	413	12.12	308	12.12	320	12.12	168	12.12	259	12.12	541	12.12	2173	12.12	1062	12.12	479	12.12	561	12.12	1046	12.12	1258	12.12	1265	12.12	762	12.12	1824
12.125	500	12.125	349	12.125	298	12.125	234	12.125	218	12.125	465	12.125	2091	12.125	1027	12.125	472	12.125	734	12.125	948	12.125	1212	12.125	1423	12.125	800	12.125	1834
12.13	466	12.13	119	12.13	253	12.13	254	12.13	186	12.13	414	12.13	2312	12.13	1155	12.13	478	12.13	832	12.13	1072	12.13	1153	12.13	1525	12.13	902	12.13	2091
12.135	373	12.135	280	12.135	188	12.135	264	12.135	159	12.135	366	12.135	2771	12.135	1429	12.135	520	12.135	731	12.135	1418	12.135	1220	12.135	1654	12.135	1081	12.135	2558
12.14	384	12.14	262	12.14	101	12.14	230	12.14	200	12.14	309	12.14	3108	12.14	1682	12.14	652	12.14	667	12.14	1583	12.14	1489	12.14	1996	12.14	1341	12.14	3078
12.145	393	12.145	218	12.145	160	12.145	223	12.145	277	12.145	221	12.145	3341	12.145	1851	12.145	840	12.145	613	12.145	1751	12.145	1772	12.145	2331	12.145	1693	12.145	3358
12.15	351	12.15	371	12.15	308	12.15	128	12.15	269	12.15	187	12.15	3464	12.15	1923	12.15	913	12.15	506	12.15	1790	12.15	1765	12.15	2337	12.15	1864	12.15	3466
12.155	258	12.155	243	12.155	130	12.155	226	12.155	236	12.155	221	12.155	3416	12.155	1871	12.155	835	12.155	397	12.155	1577	12.155	1588	12.155	2005	12.155	1686	12.155	3479
12.16	285	12.16	213	12.16	167	12.16	237	12.16	218	12.16	216	12.16	3245	12.16	1598	12.16	716	12.16	462	12.16	1400	12.16	1466	12.16	1751	12.16	1232	12.16	3352
12.165	308	12.165	151	12.165	236	12.165	269	12.165	134	12.165	198	12.165	2983	12.165	1317	12.165	600	12.165	564	12.165	1361	12.165	1348	12.165	1657	12.165	993	12.165	2971
12.17	243	12.17	195	12.17	344	12.17	143	12.17	230	12.17	241	12.17	2737	12.17	1239	12.17	485	12.17	542	12.17	1337	12.17	1212	12.17	1528	12.17	956	12.17	2571
12.175	245	12.175	266	12.175	188	12.175	252	12.175	222	12.175	240	12.175	2603	12.175	1309	12.175	418	12.175	485	12.175	1258	12.175	1135	12.175	1470	12.175	934	12.175	2384
12.18	304	12.18	208	12.18	320	12.18	255	12.18	183	12.18	193	12.18	2552	12.18	1429	12.18	450	12.18	476	12.18	1064	12.18	1155	12.18	1384	12.18	866	12.18	2262
12.185	248	12.185	185	12.185	374	12.185	317	12.185	156	12.185	202	12.185	2546	12.185	1369	12.185	467	12.185	514	12.185	992	12.185	1193	12.185	1348	12.185	805	12.185	2244
12.19	298	12.19	240	12.19	379	12.19	334	12.19	64	12.19	219	12.19	2358	12.19	1264	12.19	435	12.19	520	12.19	1086	12.19	1199	12.19	1325	12.19	827	12.19	2264
12.195	368	12.195	250	12.195	349	12.195	296	12.195	180	12.195	208	12.195	2097	12.195	1153	12.195	445	12.195	510	12.195	1128	12.195	1209	12.195	1279	12.195	905	12.195	2082
12.2	310	12.2	197	12.2	403	12.2	248	12.2	154	12.2	202	12.2	2100	12.2	1141	12.2	424	12.2	507	12.2	1136	12.2	1211	12.2	1208	12.2	846	12.2	1881
12.205	267	12.205	128	12.205	503	12.205	213	12.205	164	12.205	215	12.205	2230	12.205	1227	12.205	429	12.205	493	12.205	1166	12.205	1239	12.205	1186	12.205	779	12.205	1926
12.21	242	12.21	114	12.21	410	12.21	107	12.21	196	12.21	208	12.21	2333	12.21	1315	12.21	411	12.21	404	12.21	1198	12.21	1267	12.21	1360	12.21	752	12.21	2188
12.215	220	12.215	114	12.215	319	12.215	310	12.215	178	12.215	201	12.215	2491	12.215	1477	12.215	405	12.215	404	12.215	1200	12.215	1229	12.215	1599	12.215	820	12.215	2506
12.22	250	12.22	96	12.22	346	12.22	166	12.22	174	12.22	196	12.22	2759	12.22	1482	12.22	463	12.22	379	12.22	1217	12.22	1237	12.22	1573	12.22	1041	12.22	2690
12.225	330	12.225	216	12.225	320	12.225	319	12.225	233	12.225	184	12.225	2972	12.225	1265	12.225	480	12.225	392	12.225	1213	12.225	1256	12.225	1462	12.225	1117	12.225	2602
12.23	383	12.23	312	12.23	288	12.23	304	12.23	261	12.23	211	12.23	3029	12.23	1136	12.23	429	12.23	377	12.23	1272	12.23	1271	12.23	1480	12.23	956	12.23	2472
12.235	1221	12.235	189	12.235	317	12.235	279	12.235	231	12.235	235	12.235	2861	12.235	1038	12.235	422	12.235	360	12.235	1216	12.235	1258	12.235	1548	12.235	943	12.235	2478
12.24	3424	12.24	382	12.24	382	12.24	128	12.24	278	12.24	207	12.24	2523	12.24	1111	12.24	434	12.24	312	12.24	1027	12.24	1251	12.24	1475	12.24	938	12.24	2412
12.245	9967	12.245	439	12.245	169	12.245	159	12.245	403	12.245	3524	12.245	2132	12.245	1208	12.245	424	12.245	2749	12.245	1042	12.245	1256	12.245	1341	12.245	867	12.245	2243
12.25	23010	12.25	555	12.25	1293	12.25	150	12.25	670	12.25	10392	12.25	1984	12.25	1099	12.25	480	12.25	8999	12.25	1259	12.25	1193	12.25	1291	12.25	810	12.25	2255
12.255	39007	12.255	717	12.255	2247	12.255	1815	12.255	1030	12.255	21947	12.255	2125	12.255	944	12.255	468	12.255	24646	12.255	1192	12.255	1147	12.255	1384	12.255	777	12.255	2356
12.26	47334	12.26	994	12.26	3047	12.26	2552	12.26	1262	12.26	33475	12.26	2191	12.26	952	12.26	413	12.26	50746	12.26	983	12.26	1194	12.26	1400	12.26	719	12.26	2193
12.265	42428	12.265	1138	12.265	3053	12.265	2380	12.265	1412	12.265	37848	12.265	2208	12.265	1002	12.265	437	12.265	76175	12.265	962	12.265	1265	12.265	1313	12.265	766	12.265	1943
12.27	29924	12.27	931	12.27	2313	12.27	1818	12.27	157	12.27	31888	12.27	2324	12.27	12338	12.27	524	12.27	82620	12.27	1144	12.27	1347	12.27	1296	12.27	10974	12.27	1956
12.275	17520	12.275	699	12.275	1510	12.275	1339	12.275	864	12.275	20668	12.275	31517	12.275	27745	12.275	567	12.275	66839	12.275	1311	12.275	1392	12.275	26298	12.275	25847	12.275	2095
12.28	9155	12.28	146	12.28	1021	12.28	173	12.28	654	12.28	11931	12.28	58181	12.28	52679	12.28	624	12.28	41439	12.28	1482	12.28	47424	12.28	48871	12.28	49462	12.28	57287
12.285	4839	12.285	398	12.285	702	12.285	545	12.285	470	12.285	6948	12.285	81915	12.285	75694	12.285	719	12.285	20730	12.285	1497	12.285	60326	12.285	68618	12.285	70656	12.285	79909
12.29	328	12.29	426	12.29	553	12.29	398	12.29	349	12.29	4386	12.29	85911	12.29	78777	12.29	720	12.29	9527	12.29	1363	12.29	1671	12.29	70749	12.29	74999	12.29	84914
12.295	295	12.295	397	12.295	516	12.295	365	12.295	236	12.295	3216	12.295	69237	12.295	62142	12.295	603	12.295	5215	12.295	1255	12.295	1641	12.295	54319	12.295	59327	12.295	68705
12.3	2159	12.3	226	12.3	471	12.3	368	12.3	273	12.3	2387	12.3	45083	12.3	38567	12.3	528	12.3	3810	12.3	1053	12.3	1412	12.3	1444	12.3	35948	12.3	43894
12.305	1763	12.305	215	12.305	187	12.305	314	12.305	356	12.305	284	12.305	2461	12.305	20736	12.305	6925	12.305	3018	12.305	926	12.305	1306	12.305	1255	12.305	18511	12.305	24516
12.31	1490	12.31	335	12.31	262	12.31	274	12.31	168	12.31	1741	12.31	2471	12.31	11539	12.31	550	12.31	2632	12.31	998	12.31	1318	12.31	1152	12.31	10159	12.31	1858
12.315	1326	12.315	383	12.315	623	12.315	330	12.315	300	12.315	1394	12.315	2518	12.315	1190	12.315	551	12.315	2471	12.315	1122	12.315	1380	12.315	1196	12.315	869	12.315	1918
12.32	1164	12.32	370	12.32	520	12.32	174	12.32	333	12.32	1212	12.32	2398	12.32	1089	12.32	546	12.32	2361	12.32	1067	12.32	1309	12.32	1186	12.32	880	12.32	2022
12.325	1197	12.325	358	12.325	880	12.325	426	12.325	298	12.325	1130	12.325	2218	12.325	1117	12.325	530	12.325	1982	12.325	1061	12.325	1262	12.325	1280	12.325	848	12.325	1927
12.33	1279	12.33	369	12.33	1094	12.33	106	12.33	230	12.33	1081	12.33	2243	12.33	1171	12.33	533	12.33	362	12.33	1018	12.33	1334	12.33	1457	12.33	826	12.33	1763
12.335	1200	12.335	367	12.335	1019	12.335	179	12.335	268	12.335	275	12.335	2362	12.335	1155	12.335	546	12.335	453	12.335	1045	12.335	1334	12.335	1592	12.335	915	12.335	1939
12.34	419	12.34	386	12.34	750	12.34	404	12.34	192	12.34	979	12.34	2506	12.34	1284	12.34	545	12.34	1852	12.34	1231	12.34	1341	12.34	1684	12.34	1071	12.34	2366
12.345	298	12.345	297	12.345	497	12.345	304	12.345	211	12.345	232	12.345	2636	12.345	1463	12.345	519	12.345	1747	12.345	1407	12.345	1343	12.345	1634	12.345	1084	12.345	2649
12.35	269	12.35	222	12.35	333	12.35	125	12.35	142	12.35	195	12.35	2818	12.35	1589	12.35	536	12.35	1646	12.35	1535	12.35	1269	12.35	1577	12.35	971	12.35	2698
12.355	312	12.355	148	12.355	202	12.355	165	12.355	100	12.355	235	12.355	2811	12.355	1496	12.355	552	12.355	1615	12.355	1536	12.355	1319	12.355	1633	12.355	883	12.355	2613
12.36	330	12.36	321	12.36	133	12.36	146	12.36	112	12.36	265	12.36	2549	12.36	1165	12.36	572	12.36	513	12.36	1463	12.36	1477	12.36	1597	12.36	904	12.36	2452
12.365	282	12.365	334	12.365	121	12.365	73	12.365	273	12.365	189	12.365	2414	12.365	1076	12.365	576	12.365	1706	12.365	1271	12.365	1515	12.365	1400	12.365	1038	12.365	2249
12.37	273	12.37	361	12.37	152	12.37	211	12.37	262	12.37	149	12.37	2414	12.37	1098	12.37	539	12.37	567	12.37	1099	12.37	1375	12.37	1292	12.37	1070	12.37	2077
12.375	270	12.375	143	12.375	347	12.375	244	12.375	186	12.375	183	12.375	2275	12.375	1123	12.375	468	12.375	515	12.375	1163	12.375	1281	12.375	1233	12.375	903	12.375	1919
12.38	253	12.38	146	12.38	157	12.38	274	12.38	188	12.38	202	12.38	2125	12.38	1237	12.38	452	12.38	469	12.38	1131	12.38	1231	12.38	1167	12.38	816	12.38	1782
12.385	281	12.385	184	12.385	332	12.385	306	12.385	254	12.385	204	12.385	2133	12.385	1305	12.385	452	12.385	1427	12.385	999	12.385	1191	12.385	1150	12.385	862	12.385	1791
12.39	272	12.39	396	12.39	278	12.39	297	12.39	337	12.39	184	12.39	2160	12.39	1354	12.39	462	12.39	1506	12.39	1057	12.39	1054	12.39	1128	12.39	933	12.39	1904
12.395	339	12.395	440	12.395	177	12.395	267	12.395	368	12.395	168	12.395	2347	12.395	1344	12.395	539	12.395	1254	12.395	1189	12.395	1049	12.395	1190	12.395	923	12.395	2153
12.4	363	12.4	399	12.4	185	12.4	254	12.4	329	12.4	189	12.4	2772	12.4	1257	12.4	485	12.4	345	12.4	1107	12.4	1246	12.4	1430	12.4	877	12.4	2463
12.405	284	12.405	367	12.405	267	12.405	242	12.405	285	12.405	195	12.405	2977	12.405	1280	12.405	435	12.405	426	12.405	1096	12.405	1419	12.405	1560	12.405	824	12.405	2563
12.41	331	12.41	370	12.41	324	12.41	211	12.41	256	12.41	216	12.41	2801	12.41	1421	12.41	477	12.41	474	12.41	1122	12.41	1464	12.41	1465	12.41	936	12.41	2536
12.415	361	12.415	394	12.415	322	12.415	230	12.415	215	12.415	230	12.415	2622	12.415	1233	12.415	493	12.415	510	12.415	969	12.415	1372	12.415	1318	12.415	982	12.415	3353
12.42	270	12.42	386	12.42	303	12.42	264	12.42	205	12.42	203	12.42	2425	12.42	1173	12.42	493	12.42	554	12.42	907	12.42	1129	12.42	1254	12.42	868	12.42	3170
12.425	249	12.425	334	12.425	125	12.425	259	12.425	252	12.425	198	12.425	2217	12.425	1197	12.425	502	12.425	458	12.425	971	12.425	1062	12.425	1262	12.425	904	12.425	2224
12.43	267	12.43	140	12.43	142	12.43	143	12.43	278	12.43	248	12.43	2189	12.43	1181	12.43	513	12.43	410	12.43	1041	12.43	1060	12.43	1235	12.43	928	12.43	2087
12.435	271	12.435	134	12.435	261	12.435	117	12.435	278	12.435	243	12.435	2145	12.435	1173	12.435	530	12.435	509	12.435	1058	12.435	1102	12.435	1178	12.435	883	12.435	2047
12.44	319	12.44	154	12.44	245	12.44	289	12.44	91	12.44	218	12.44	2112	12.44	1156	12.44	478	12.44	550	12.44	1007	12.44	1249	12.44	1188	12.44	898	12.44	1932
12.445	405	12.445	176	12.445	278	12.445	345	12.445	265	12.445	250	12.445	2224	12.445	1205	12.445	360	12.445	527	12.445	1016	12.445	1380	12.445	1249	12.445	992	12.445	1928
12.45	355	12.45	170	12.45	289	12.45	314	12.45	292	12.45	251	12.45	2161	12.45	1239	12.45	392	12.45	504	12.45	1094	12.45	1393	12.45	1229	12.45	1024	12.45	2024
12.455	275	12.455	179	12.455	283	12.455	298	12.455	75	12.455	181	12.455	2108	12.455	1232	12.455	514	12.455	467	12.455	1139	12.455	1421	12.455	1126	12.455	946	12.455	1946
12.46	273	12.46	356	12.46	310	12.46	114	12.46	73	12.46	115	12.46	2094	12.46	1226	12.46	567	12.46	492	12.46	1131	12.46	1458	12.46	1151	12.46	843	12.46	1893
12.465	278	12.465	343	12.465	338	12.465	120	12.465	113	12.465	144	12.465	1895	12.465	1226	12.465	523	12.465	1375	12.465	1133	12.465	1384	12.465	1233	12.465	824	12.465	1883
12.47	227	12.47	279	12.47	371	12.47	199	12.47	162	12.47	169	12.47	1893	12.47	1294	12.47	458	12.47	470	12.47	1075	12.47	1344	12.47	1230	12.47	884	12.47	1803
12.475	220	12.475	296	12.475	435	12.475	200	12.475	310	12.475	126	12.475	2036	12.475	1273	12.475	442	12.475	597	12.475	974	12.475	1279	12.475	1281	12.475	926	12.475	1835
12.48	243	12.48	449	12.48	419	12.48	290	12.48	284	12.48	105	12.48	2099	12.48	1200	12.48	451	12.48	565	12.48	892	12.48	1234	12.48	1307	12.48	981	12.48	1756
12.485	314	12.485	437	12.485	339	12.485	297	12.485	292	12.485	147	12.485	2270	12.485	1284	12.485	540	12.485	426	12.485	872	12.485	1308	12.485	1322	12.485	928	12.485	1725
12.49	388	12.49	440	12.49	292	12.49	256	12.49	371	12.49	218	12.49	2378	12.49	1235	12.49	561	12.49	1169	12.49	1005	12.49	1247	12.49	1312	12.49	867	12.49	1933
12.495	370	12.495	389	12.495	295	12.495	217	12.495	314	12.495	245	12.495	2138	12.495	1216	12.495	480	12.495	417	12.495	1135	12.495	1169	12.495	1262	12.495	889	12.495	2039
12.5	276	12.5	322	12.5	331	12.5	205	12.5	225	12.5	202	12.5	2096	12.5	1216	12.5	438	12.5	517	12.5	1110	12.5	1226	12.5	1189	12.5	891	12.5	1976
12.505	229	12.505	366	12.505	379	12.505	254	12.505	317	12.505	178	12.505	2353	12.505	1200	12.505	485	12.505	499	12.505	1051	12.505	1308	12.505	1243	12.505	856	12.505	1971
12.51	261	12.51	195	12.51	432	12.51	240	12.51	163	12.51	238	12.51	2471	12.51	1171	12.51	551	12.51	435	12.51	1032	12.51	1398	12.51	1426	12.51	891	12.51	2029
12.515	276	12.515	328	12.515	457	12.515	199	12.515	260	12.515	226	12.515	2407	12.515	1136	12.515	578	12.515	447	12.515	1015	12.515	1414	12.515	1511	12.515	949	12.515	2159
12.52	256	12.52	375	12.52	408	12.52	268	12.52	228	12.52	115	12.52	2357	12.52	1129	12.52	530	12.52	415	12.52	975	12.52	1318	12.52	1480	12.52	1055	12.52	2294
12.525	269	12.525	498	12.525	325	12.525	305	12.525	163	12.525	113	12.525	2336	12.525	1211	12.525	486	12.525	375	12.525	1054	12.525	1288	12.525	1391	12.525	1038	12.525	2266
12.53	261	12.53	452	12.53	153	12.53	284	12.53	197	12.53	196	12.53	2418	12.53	1264	12.53	493	12.53	429	12.53	1162	12.53	1316	12.53	1319	12.53	906	12.53	2150
12.535	282	12.535	331	12.535	177	12.535	319	12.535	288	12.535	224	12.535	2559	12.535	1235	12.535	454	12.535	517	12.535	1145	12.535	1239	12.535	1296	12.535	814	12.535	2157
12.54	263	12.54	339	12.54	342	12.54	345	12.54	284	12.54	230	12.54	2548	12.54	1199	12.54	414	12.54	615	12.54	1093	12.54	1267	12.54	1333	12.54	837	12.54	2290
12.545	225	12.545	402	12.545	356	12.545	295	12.545	270	12.545	222	12.545	2448	12.545	1220	12.545	410	12.545	536	12.545	1122	12.545	1381	12.545	1397	12.545	826	12.545	2178
12.55	204	12.55	429	12.55	372	12.55	250	12.55	219	12.55	170	12.55	2436	12.55	1285	12.55	403	12.55	1152	12.55	1117	12.55	1395	12.55	1441	12.55	854	12.55	1957
12.555	203	12.555	227	12.555	322	12.555	283	12.555	248	12.555	210	12.555	2508	12.555	1275	12.555	434	12.555	373	12.555	999	12.555	1363	12.555	1491	12.555	942	12.555	1975
12.56	275	12.56	313	12.56	264	12.56	309	12.56	335	12.56	257	12.56	2557	12.56	1161	12.56	484	12.56	329	12.56	986	12.56	1392	12.56	1480	12.56	984	12.56	2722
12.565	339	12.565	320	12.565	310	12.565	288	12.565	334	12.565	252	12.565	2416	12.565	1073	12.565	496	12.565	327	12.565	1077	12.565	1433	12.565	1357	12.565	942	12.565	1759
12.57	277	12.57	235	12.57	313	12.57	261	12.57	272	12.57	209	12.57	2235	12.57	1109	12.57	497	12.57	397	12.57	1131	12.57	1438	12.57	1262	12.57	892	12.57	1778
12.575	197	12.575	206	12.575	277	12.575	250	12.575	193	12.575	212	12.575	2320	12.575	1225	12.575	546	12.575	480	12.575	1125	12.575	1436	12.575	1272	12.575	901	12.575	1894
12.58	191	12.58	196	12.58	313	12.58	95	12.58	188	12.58	222	12.58	2447	12.58	1240	12.58	531	12.58	521	12.58	1110	12.58	1519	12.58	1336	12.58	914	12.58	1925
12.585	253	12.585	451	12.585	209	12.585	91	12.585	248	12.585	202	12.585	2405	12.585	1189	12.585	454	12.585	560	12.585	1131	12.585	1560	12.585	1375	12.585	859	12.585	1898
12.59	270	12.59	404	12.59	194	12.59	278	12.59	286	12.59	180	12.59	2295	12.59	1229	12.59	424	12.59	504	12.59	1099	12.59	1430	12.59	1399	12.59	910	12.59	2004
12.595	312	12.595	157	12.595	290	12.595	268	12.595	246	12.595	202	12.595	2286	12.595	1167	12.595	415	12.595	451	12.595	1006	12.595	1220	12.595	1318	12.595	1061	12.595	2227
12.6	312	12.6	174	12.6	241	12.6	199	12.6	190	12.6	272	12.6	2325	12.6	1064	12.6	424	12.6	411	12.6	968	12.6	1183	12.6	1207	12.6	1033	12.6	2362
12.605	248	12.605	200	12.605	305	12.605	94	12.605	195	12.605	279	12.605	2270	12.605	1167	12.605	466	12.605	400	12.605	945	12.605	1238	12.605	1268	12.605	989	12.605	2274
12.61	248	12.61	164	12.61	405	12.61	198	12.61	227	12.61	259	12.61	2181	12.61	1248	12.61	435	12.61	338	12.61	1016	12.61	1285	12.61	1336	12.61	991	12.61	2062
12.615	317	12.615	145	12.615	424	12.615	269	12.615	247	12.615	276	12.615	2123	12.615	1169	12.615	400	12.615	344	12.615	1189	12.615	1396	12.615	1276	12.615	974	12.615	1975
12.62	297	12.62	287	12.62	390	12.62	342	12.62	270	12.62	288	12.62	2050	12.62	1125	12.62	441	12.62	438	12.62	1193	12.62	1458	12.62	1238	12.62	889	12.62	2091
12.625	278	12.625	311	12.625	387	12.625	336	12.625	226	12.625	212	12.625	2066	12.625	1177	12.625	499	12.625	475	12.625	1178	12.625	1457	12.625	1322	12.625	914	12.625	2138
12.63	253	12.63	332	12.63	454	12.63	272	12.63	179	12.63	205	12.63	2245	12.63	2935	12.63	485	12.63	516	12.63	1147	12.63	1545	12.63	1426	12.63	936	12.63	2123
12.635	221	12.635	433	12.635	528	12.635	260	12.635	185	12.635	227	12.635	2419	12.635	1245	12.635	461	12.635	564	12.635	1120	12.635	1715	12.635	1496	12.635	902	12.635	2072
12.64	225	12.64	456	12.64	494	12.64	316	12.64	189	12.64	183	12.64	2354	12.64	1271	12.64	555	12.64	1173	12.64	1139	12.64	1835	12.64	1410	12.64	912	12.64	2050
12.645	241	12.645	355	12.645	380	12.645	128	12.645	297	12.645	160	12.645	2467	12.645	1222	12.645	582	12.645	410	12.645	1145	12.645	1769	12.645	1317	12.645	1051	12.645	2171
12.65	310	12.65	159	12.65	285	12.65	312	12.65	224	12.65	185	12.65	2656	12.65	1200	12.65	523	12.65	465	12.65	1174	12.65	1589	12.65	1381	12.65	1139	12.65	2181
12.655	365	12.655	224	12.655	226	12.655	237	12.655	120	12.655	173	12.655	2530	12.655	1275	12.655	536	12.655	518	12.655	1241	12.655	1492	12.655	1468	12.655	1091	12.655	2084
12.66	310	12.66	276	12.66	259	12.66	256	12.66	140	12.66	175	12.66	2407	12.66	1315	12.66	648	12.66	507	12.66	1221	12.66	1542	12.66	1496	12.66	1017	12.66	7047
12.665	299	12.665	404	12.665	347	12.665	318	12.665	144	12.665	192	12.665	2371	12.665	1341	12.665	610	12.665	1163	12.665	1147	12.665	1553	12.665	1499	12.665	1038	12.665	2113
12.67	320	12.67	178	12.67	334	12.67	192	12.67	134	12.67	202	12.67	2363	12.67	1363	12.67	533	12.67	312	12.67	1141	12.67	1472	12.67	1496	12.67	1126	12.67	2146
12.675	275	12.675	371	12.675	296	12.675	178	12.675	107	12.675	207	12.675	2414	12.675	1411	12.675	554	12.675	382	12.675	1229	12.675	1499	12.675	1461	12.675	1132	12.675	2255
12.68	248	12.68	318	12.68	319	12.68	147	12.68	185	12.68	198	12.68	2416	12.68	1325	12.68	507	12.68	360	12.68	1283	12.68	1581	12.68	1489	12.68	1109	12.68	2190
12.685	329	12.685	168	12.685	310	12.685	142	12.685	220	12.685	184	12.685	2301	12.685	1318	12.685	464	12.685	387	12.685	1199	12.685	1487	12.685	1548	12.685	1128	12.685	2086
12.69	429	12.69	214	12.69	307	12.69	148	12.69	238	12.69	182	12.69	2182	12.69	1317	12.69	533	12.69	566	12.69	1061	12.69	1546	12.69	1565	12.69	1005	12.69	2176
12.695	371	12.695	191	12.695	381	12.695	276	12.695	277	12.695	194	12.695	2206	12.695	1149	12.695	518	12.695	670	12.695	1024	12.695	1530	12.695	1592	12.695	879	12.695	2237
12.7	288	12.7	148	12.7	422	12.7	326	12.7	306	12.7	255	12.7	2406	12.7	1217	12.7	473	12.7	560	12.7	1144	12.7	1464	12.7	1616	12.7	927	12.7	2172
12.705	253	12.705	168	12.705	394	12.705	174	12.705	296	12.705	403	12.705	4427	12.705	1339	12.705	528	12.705	490	12.705	1283	12.705	1475	12.705	1580	12.705	997	12.705	2119
12.71	280	12.71	324	12.71	431	12.71	175	12.71	239	12.71	455	12.71	2442	12.71	1298	12.71	518	12.71	630	12.71	1192	12.71	1582	12.71	1487	12.71	981	12.71	2080
12.715	267	12.715	388	12.715	436	12.715	351	12.715	183	12.715	376	12.715	2405	12.715	1351	12.715	466	12.715	770	12.715	1063	12.715	1624	12.715	1515	12.715	910	12.715	2075
12.72	260	12.72	144	12.72	177	12.72	302	12.72	194	12.72	328	12.72	2320	12.72	1382	12.72	538	12.72	758	12.72	1057	12.72	1571	12.72	1627	12.72	1000	12.72	2142
12.725	211	12.725	290	12.725	159	12.725	331	12.725	202	12.725	306	12.725	2330	12.725	1346	12.725	553	12.725	777	12.725	1049	12.725	1534	12.725	1653	12.725	1136	12.725	2175
12.73	250	12.73	312	12.73	168	12.73	320	12.73	100	12.73	261	12.73	2422	12.73	1381	12.73	554	12.73	765	12.73	1064	12.73	1558	12.73	1606	12.73	1120	12.73	2050
12.735	352	12.735	372	12.735	305	12.735	182	12.735	123	12.735	165	12.735	2458	12.735	1362	12.735	601	12.735	677	12.735	1160	12.735	1526	12.735	1490	12.735	1101	12.735	1949
12.74	337	12.74	469	12.74	295	12.74	202	12.74	203	12.74	239	12.74	2468	12.74	1322	12.74	637	12.74	589	12.74	1234	12.74	1604	12.74	1361	12.74	1128	12.74	2100
12.745	329	12.745	308	12.745	376	12.745	236	12.745	149	12.745	243	12.745	2445	12.745	1236	12.745	632	12.745	548	12.745	1154	12.745	1619	12.745	1314	12.745	1091	12.745	2243
12.75	304	12.75	249	12.75	225	12.75	244	12.75	196	12.75	173	12.75	2447	12.75	1165	12.75	672	12.75	496	12.75	1115	12.75	1496	12.75	1331	12.75	981	12.75	2259
12.755	264	12.755	214	12.755	176	12.755	198	12.755	288	12.755	140	12.755	2485	12.755	1187	12.755	691	12.755	475	12.755	1321	12.755	1545	12.755	1372	12.755	993	12.755	2262
12.76	279	12.76	210	12.76	112	12.76	190	12.76	333	12.76	151	12.76	2691	12.76	1319	12.76	709	12.76	520	12.76	1515	12.76	1730	12.76	1467	12.76	1198	12.76	2387
12.765	299	12.765	282	12.765	96	12.765	273	12.765	166	12.765	181	12.765	3039	12.765	1486	12.765	756	12.765	608	12.765	1571	12.765	1812	12.765	1688	12.765	1413	12.765	2657
12.77	301	12.77	302	12.77	128	12.77	318	12.77	150	12.77	271	12.77	3372	12.77	1782	12.77	795	12.77	629	12.77	1654	12.77	1873	12.77	2050	12.77	1597	12.77	3118
12.775	521	12.775	292	12.775	335	12.775	286	12.775	102	12.775	360	12.775	3627	12.775	1875	12.775	795	12.775	685	12.775	1715	12.775	2006	12.775	2205	12.775	1616	12.775	3504
12.78	545	12.78	403	12.78	335	12.78	244	12.78	88	12.78	262	12.78	3713	12.78	1822	12.78	710	12.78	955	12.78	1673	12.78	2017	12.78	2027	12.78	1505	12.78	3289
12.785	564	12.785	208	12.785	278	12.785	203	12.785	122	12.785	251	12.785	3524	12.785	1724	12.785	775	12.785	805	12.785	1654	12.785	1787	12.785	1822	12.785	1366	12.785	2757
12.79	326	12.79	365	12.79	287	12.79	220	12.79	173	12.79	280	12.79	3177	12.79	1649	12.79	597	12.79	940	12.79	1619	12.79	1633	12.79	1639	12.79	1190	12.79	2541
12.795	344	12.795	416	12.795	245	12.795	235	12.795	140	12.795	504	12.795	4249	12.795	1753	12.795	694	12.795	1008	12.795	1600	12.795	1518	12.795	1567	12.795	1247	12.795	2608
12.8	358	12.8	449	12.8	490	12.8	279	12.8	136	12.8	246	12.8	2867	12.8	1864	12.8	774	12.8	972	12.8	1714	12.8	1688	12.8	1659	12.8	1376	12.8	2687
12.805	312	12.805	421	12.805	256	12.805	319	12.805	168	12.805	248	12.805	3105	12.805	1860	12.805	850	12.805	802	12.805	1880	12.805	1884	12.805	1766	12.805	1347	12.805	2907
12.81	315	12.81	274	12.81	237	12.81	120	12.81	179	12.81	232	12.81	3175	12.81	1843	12.81	907	12.81	591	12.81	1861	12.81	1967	12.81	1807	12.81	1416	12.81	2990
12.815	381	12.815	256	12.815	216	12.815	57	12.815	109	12.815	213	12.815	3055	12.815	1832	12.815	903	12.815	485	12.815	1744	12.815	2084	12.815	1802	12.815	1582	12.815	2613
12.82	374	12.82	231	12.82	375	12.82	48	12.82	59	12.82	168	12.82	2950	12.82	1773	12.82	908	12.82	522	12.82	1697	12.82	2151	12.82	1859	12.82	1661	12.82	2409
12.825	315	12.825	257	12.825	367	12.825	202	12.825	82	12.825	135	12.825	2885	12.825	1740	12.825	837	12.825	542	12.825	1581	12.825	2050	12.825	1935	12.825	1602	12.825	2611
12.83	248	12.83	245	12.83	321	12.83	224	12.83	230	12.83	138	12.83	2648	12.83	1795	12.83	747	12.83	516	12.83	1401	12.83	1791	12.83	1772	12.83	1451	12.83	2777
12.835	261	12.835	199	12.835	287	12.835	231	12.835	199	12.835	136	12.835	2418	12.835	1800	12.835	736	12.835	1200	12.835	1371	12.835	1564	12.835	1520	12.835	1298	12.835	2671
12.84	259	12.84	385	12.84	286	12.84	225	12.84	287	12.84	192	12.84	2635	12.84	1664	12.84	688	12.84	1201	12.84	1355	12.84	1477	12.84	1429	12.84	1176	12.84	2367
12.845	248	12.845	429	12.845	302	12.845	266	12.845	249	12.845	256	12.845	2746	12.845	1541	12.845	646	12.845	1259	12.845	1184	12.845	1453	12.845	1419	12.845	1060	12.845	2169
12.85	256	12.85	436	12.85	328	12.85	297	12.85	125	12.85	256	12.85	2411	12.85	1416	12.85	550	12.85	499	12.85	1104	12.85	1377	12.85	1449	12.85	1042	12.85	2184
12.855	278	12.855	369	12.855	353	12.855	299	12.855	224	12.855	264	12.855	2162	12.855	1331	12.855	487	12.855	515	12.855	1059	12.855	1529	12.855	1464	12.855	1011	12.855	2120
12.86	229	12.86	362	12.86	344	12.86	287	12.86	253	12.86	229	12.86	2200	12.86	1328	12.86	520	12.86	509	12.86	1120	12.86	1701	12.86	1414	12.86	970	12.86	2107
12.865	232	12.865	360	12.865	230	12.865	288	12.865	141	12.865	220	12.865	2271	12.865	1346	12.865	597	12.865	488	12.865	1199	12.865	1599	12.865	1416	12.865	1010	12.865	2224
12.87	262	12.87	155	12.87	352	12.87	296	12.87	163	12.87	158	12.87	2232	12.87	1412	12.87	640	12.87	483	12.87	1099	12.87	1452	12.87	1431	12.87	1062	12.87	2189
12.875	261	12.875	158	12.875	316	12.875	278	12.875	167	12.875	120	12.875	2208	12.875	1478	12.875	523	12.875	541	12.875	990	12.875	1461	12.875	1450	12.875	1077	12.875	2102
12.88	259	12.88	403	12.88	333	12.88	113	12.88	124	12.88	145	12.88	2294	12.88	1488	12.88	450	12.88	597	12.88	1000	12.88	1371	12.88	1471	12.88	1045	12.88	2084
12.885	243	12.885	409	12.885	374	12.885	92	12.885	312	12.885	194	12.885	2406	12.885	1440	12.885	525	12.885	749	12.885	1168	12.885	1321	12.885	1403	12.885	1084	12.885	2054
12.89	185	12.89	383	12.89	366	12.89	105	12.89	271	12.89	201	12.89	2459	12.89	1400	12.89	538	12.89	698	12.89	1202	12.89	1534	12.89	1345	12.89	1123	12.89	2004
12.895	189	12.895	249	12.895	376	12.895	266	12.895	202	12.895	187	12.895	2417	12.895	1451	12.895	525	12.895	434	12.895	1221	12.895	1633	12.895	1479	12.895	1206	12.895	2107
12.9	225	12.9	204	12.9	380	12.9	212	12.9	236	12.9	207	12.9	2342	12.9	1577	12.9	539	12.9	462	12.9	1356	12.9	1603	12.9	1701	12.9	1387	12.9	2317
12.905	247	12.905	192	12.905	355	12.905	177	12.905	313	12.905	209	12.905	2478	12.905	1697	12.905	581	12.905	444	12.905	1517	12.905	1711	12.905	1821	12.905	1533	12.905	2393
12.91	287	12.91	366	12.91	332	12.91	168	12.91	300	12.91	192	12.91	2714	12.91	2004	12.91	664	12.91	414	12.91	1584	12.91	1960	12.91	1898	12.91	1522	12.91	2593
12.915	303	12.915	189	12.915	319	12.915	270	12.915	301	12.915	223	12.915	2977	12.915	2258	12.915	679	12.915	462	12.915	1524	12.915	2008	12.915	1951	12.915	1454	12.915	2796
12.92	391	12.92	219	12.92	325	12.92	258	12.92	352	12.92	268	12.92	3245	12.92	2150	12.92	695	12.92	475	12.92	1470	12.92	1850	12.92	1830	12.92	1435	12.92	2721
12.925	360	12.925	225	12.925	347	12.925	310	12.925	328	12.925	269	12.925	3166	12.925	1938	12.925	721	12.925	518	12.925	1397	12.925	1717	12.925	1638	12.925	1432	12.925	2525
12.93	269	12.93	445	12.93	338	12.93	276	12.93	223	12.93	321	12.93	2847	12.93	1772	12.93	648	12.93	672	12.93	1294	12.93	1673	12.93	1537	12.93	1341	12.93	2374
12.935	254	12.935	392	12.935	352	12.935	248	12.935	204	12.935	314	12.935	2718	12.935	1678	12.935	568	12.935	692	12.935	1278	12.935	1581	12.935	1667	12.935	1189	12.935	2236
12.94	277	12.94	182	12.94	210	12.94	252	12.94	232	12.94	228	12.94	2644	12.94	1723	12.94	595	12.94	570	12.94	1227	12.94	1523	12.94	1729	12.94	1203	12.94	2056
12.945	272	12.945	315	12.945	161	12.945	215	12.945	180	12.945	164	12.945	2317	12.945	1772	12.945	608	12.945	483	12.945	1129	12.945	1504	12.945	1542	12.945	1264	12.945	1967
12.95	306	12.95	326	12.95	253	12.95	233	12.95	146	12.95	129	12.95	2196	12.95	1725	12.95	584	12.95	450	12.95	1173	12.95	1538	12.95	1413	12.95	1192	12.95	2062
12.955	335	12.955	328	12.955	224	12.955	319	12.955	201	12.955	129	12.955	2532	12.955	1681	12.955	571	12.955	446	12.955	1215	12.955	1573	12.955	1401	12.955	1140	12.955	2182
12.96	312	12.96	208	12.96	253	12.96	339	12.96	220	12.96	165	12.96	2788	12.96	1653	12.96	539	12.96	500	12.96	1220	12.96	1548	12.96	1405	12.96	1202	12.96	2104
12.965	253	12.965	192	12.965	255	12.965	280	12.965	286	12.965	202	12.965	2850	12.965	1694	12.965	544	12.965	560	12.965	1374	12.965	1589	12.965	1476	12.965	1280	12.965	1987
12.97	211	12.97	333	12.97	238	12.97	327	12.97	202	12.97	222	12.97	2738	12.97	1694	12.97	596	12.97	474	12.97	1464	12.97	1628	12.97	1483	12.97	1307	12.97	2069
12.975	201	12.975	331	12.975	313	12.975	207	12.975	211	12.975	225	12.975	2628	12.975	1555	12.975	629	12.975	1370	12.975	1348	12.975	1760	12.975	1348	12.975	1281	12.975	2151
12.98	207	12.98	203	12.98	400	12.98	185	12.98	118	12.98	206	12.98	2593	12.98	1554	12.98	629	12.98	586	12.98	1184	12.98	1846	12.98	1283	12.98	1228	12.98	2159
12.985	263	12.985	326	12.985	381	12.985	251	12.985	176	12.985	184	12.985	2499	12.985	1601	12.985	640	12.985	667	12.985	1147	12.985	1688	12.985	1383	12.985	1159	12.985	2168
12.99	307	12.99	394	12.99	188	12.99	232	12.99	216	12.99	187	12.99	2495	12.99	1584	12.99	608	12.99	719	12.99	1275	12.99	1468	12.99	1476	12.99	1197	12.99	2181
12.995	280	12.995	486	12.995	159	12.995	171	12.995	248	12.995	242	12.995	2498	12.995	1589	12.995	555	12.995	617	12.995	1360	12.995	1522	12.995	1497	12.995	1122	12.995	2179
13	283	13	410	13	105	13	202	13	252	13	305	13	2395	13	1565	13	594	13	546	13	1311	13	1652	13	1454	13	1043	13	2122
13.005	299	13.005	376	13.005	104	13.005	181	13.005	296	13.005	205	13.005	2284	13.005	1525	13.005	654	13.005	560	13.005	1144	13.005	1642	13.005	1442	13.005	1036	13.005	2091
13.01	325	13.01	260	13.01	148	13.01	291	13.01	288	13.01	102	13.01	2278	13.01	1493	13.01	558	13.01	520	13.01	1197	13.01	1569	13.01	1422	13.01	1175	13.01	1949
13.015	363	13.015	282	13.015	393	13.015	306	13.015	245	13.015	117	13.015	2506	13.015	1597	13.015	471	13.015	568	13.015	1350	13.015	1549	13.015	1296	13.015	1185	13.015	1828
13.02	326	13.02	210	13.02	371	13.02	406	13.02	264	13.02	190	13.02	2594	13.02	1563	13.02	544	13.02	591	13.02	1352	13.02	1572	13.02	1319	13.02	1180	13.02	2032
13.025	272	13.025	116	13.025	333	13.025	426	13.025	174	13.025	239	13.025	2320	13.025	1492	13.025	547	13.025	523	13.025	1256	13.025	1558	13.025	1494	13.025	1346	13.025	2196
13.03	259	13.03	355	13.03	285	13.03	363	13.03	359	13.03	267	13.03	2089	13.03	1627	13.03	504	13.03	518	13.03	1200	13.03	1514	13.03	1607	13.03	1359	13.03	2097
13.035	245	13.035	395	13.035	291	13.035	188	13.035	317	13.035	267	13.035	2175	13.035	1803	13.035	531	13.035	528	13.035	1220	13.035	1458	13.035	1602	13.035	1266	13.035	2091
13.04	172	13.04	400	13.04	329	13.04	270	13.04	351	13.04	204	13.04	2464	13.04	1725	13.04	590	13.04	472	13.04	1306	13.04	1532	13.04	1482	13.04	1304	13.04	2203
13.045	201	13.045	410	13.045	338	13.045	249	13.045	328	13.045	186	13.045	2633	13.045	1595	13.045	649	13.045	415	13.045	1270	13.045	1672	13.045	1350	13.045	1259	13.045	2222
13.05	203	13.05	171	13.05	219	13.05	256	13.05	176	13.05	246	13.05	2575	13.05	1670	13.05	650	13.05	408	13.05	1205	13.05	1732	13.05	1437	13.05	1137	13.05	2101
13.055	161	13.055	198	13.055	349	13.055	108	13.055	205	13.055	274	13.055	2431	13.055	1675	13.055	577	13.055	392	13.055	1282	13.055	1645	13.055	1614	13.055	1245	13.055	1992
13.06	237	13.06	237	13.06	358	13.06	255	13.06	286	13.06	252	13.06	2356	13.06	1691	13.06	568	13.06	467	13.06	1333	13.06	1577	13.06	1611	13.06	1312	13.06	2035
13.065	278	13.065	219	13.065	382	13.065	305	13.065	198	13.065	250	13.065	2512	13.065	1698	13.065	597	13.065	457	13.065	1379	13.065	1556	13.065	1528	13.065	1120	13.065	2217
13.07	259	13.07	249	13.07	354	13.07	299	13.07	190	13.07	261	13.07	2596	13.07	1607	13.07	614	13.07	462	13.07	1430	13.07	1611	13.07	1469	13.07	1060	13.07	2371
13.075	329	13.075	297	13.075	298	13.075	304	13.075	233	13.075	256	13.075	2590	13.075	1548	13.075	634	13.075	548	13.075	1443	13.075	1673	13.075	1476	13.075	1104	13.075	2279
13.08	384	13.08	291	13.08	282	13.08	294	13.08	265	13.08	218	13.08	2651	13.08	1606	13.08	634	13.08	559	13.08	1381	13.08	1673	13.08	1528	13.08	1219	13.08	2314
13.085	336	13.085	269	13.085	291	13.085	125	13.085	250	13.085	192	13.085	2669	13.085	1706	13.085	728	13.085	650	13.085	1305	13.085	1722	13.085	1601	13.085	1071	13.085	2533
13.09	248	13.09	219	13.09	301	13.09	247	13.09	255	13.09	182	13.09	2656	13.09	1758	13.09	755	13.09	784	13.09	1238	13.09	1694	13.09	1699	13.09	1127	13.09	2499
13.095	197	13.095	216	13.095	338	13.095	313	13.095	241	13.095	163	13.095	2546	13.095	1813	13.095	604	13.095	781	13.095	1212	13.095	1566	13.095	1685	13.095	1237	13.095	2354
13.1	167	13.1	269	13.1	151	13.1	341	13.1	220	13.1	200	13.1	2453	13.1	1688	13.1	558	13.1	700	13.1	1293	13.1	1548	13.1	1529	13.1	1206	13.1	2367
13.105	211	13.105	447	13.105	171	13.105	354	13.105	254	13.105	223	13.105	2544	13.105	1539	13.105	633	13.105	606	13.105	1443	13.105	1636	13.105	1504	13.105	1585	13.105	2400
13.11	248	13.11	432	13.11	398	13.11	341	13.11	283	13.11	211	13.11	2717	13.11	1526	13.11	600	13.11	607	13.11	1417	13.11	1958	13.11	1576	13.11	1234	13.11	2383
13.115	208	13.115	238	13.115	189	13.115	281	13.115	275	13.115	245	13.115	2929	13.115	1575	13.115	573	13.115	621	13.115	1463	13.115	2194	13.115	1749	13.115	1311	13.115	2549
13.12	195	13.12	189	13.12	168	13.12	291	13.12	235	13.12	289	13.12	3024	13.12	1743	13.12	636	13.12	666	13.12	1525	13.12	2251	13.12	1974	13.12	1368	13.12	2834
13.125	242	13.125	153	13.125	192	13.125	347	13.125	215	13.125	266	13.125	3026	13.125	1952	13.125	743	13.125	715	13.125	1472	13.125	2165	13.125	1986	13.125	1467	13.125	2867
13.13	235	13.13	176	13.13	326	13.13	345	13.13	257	13.13	205	13.13	3021	13.13	2025	13.13	719	13.13	707	13.13	1435	13.13	1987	13.13	1849	13.13	1576	13.13	2608
13.135	210	13.135	192	13.135	382	13.135	322	13.135	286	13.135	174	13.135	2921	13.135	1982	13.135	613	13.135	597	13.135	1432	13.135	1817	13.135	1744	13.135	1568	13.135	2392
13.14	264	13.14	180	13.14	420	13.14	250	13.14	284	13.14	216	13.14	2795	13.14	2465	13.14	574	13.14	499	13.14	1487	13.14	1782	13.14	1696	13.14	1422	13.14	2432
13.145	317	13.145	207	13.145	376	13.145	148	13.145	308	13.145	267	13.145	2696	13.145	2379	13.145	583	13.145	589	13.145	1507	13.145	1826	13.145	1692	13.145	1377	13.145	2403
13.15	244	13.15	219	13.15	304	13.15	197	13.15	275	13.15	278	13.15	2614	13.15	1644	13.15	669	13.15	686	13.15	1494	13.15	1711	13.15	1656	13.15	1382	13.15	2314
13.155	205	13.155	173	13.155	273	13.155	184	13.155	253	13.155	243	13.155	2536	13.155	1630	13.155	753	13.155	577	13.155	1430	13.155	1730	13.155	1670	13.155	1404	13.155	2298
13.16	282	13.16	264	13.16	329	13.16	391	13.16	279	13.16	211	13.16	2558	13.16	1632	13.16	749	13.16	540	13.16	1254	13.16	1902	13.16	1680	13.16	1341	13.16	2329
13.165	263	13.165	200	13.165	238	13.165	336	13.165	250	13.165	207	13.165	2517	13.165	1673	13.165	653	13.165	643	13.165	1264	13.165	1814	13.165	1587	13.165	1134	13.165	2415
13.17	241	13.17	446	13.17	191	13.17	305	13.17	226	13.17	176	13.17	2411	13.17	1727	13.17	581	13.17	966	13.17	1325	13.17	1674	13.17	1601	13.17	1195	13.17	2362
13.175	213	13.175	227	13.175	322	13.175	326	13.175	300	13.175	169	13.175	2423	13.175	2292	13.175	610	13.175	755	13.175	1325	13.175	1676	13.175	1680	13.175	1371	13.175	2244
13.18	220	13.18	201	13.18	386	13.18	324	13.18	358	13.18	225	13.18	2440	13.18	1544	13.18	592	13.18	641	13.18	1248	13.18	1637	13.18	1615	13.18	1524	13.18	2232
13.185	200	13.185	476	13.185	421	13.185	365	13.185	340	13.185	232	13.185	2408	13.185	1493	13.185	573	13.185	476	13.185	1282	13.185	1655	13.185	1627	13.185	1491	13.185	2214
13.19	253	13.19	220	13.19	230	13.19	429	13.19	340	13.19	208	13.19	2410	13.19	1618	13.19	573	13.19	424	13.19	1347	13.19	1636	13.19	1676	13.19	1240	13.19	2222
13.195	360	13.195	208	13.195	205	13.195	397	13.195	344	13.195	216	13.195	2467	13.195	1670	13.195	588	13.195	536	13.195	1338	13.195	1660	13.195	1592	13.195	1085	13.195	2235
13.2	361	13.2	170	13.2	203	13.2	275	13.2	268	13.2	208	13.2	2654	13.2	1584	13.2	631	13.2	744	13.2	1348	13.2	1760	13.2	1681	13.2	1133	13.2	2181
13.205	337	13.205	148	13.205	396	13.205	219	13.205	247	13.205	168	13.205	2647	13.205	1573	13.205	565	13.205	811	13.205	1331	13.205	1772	13.205	1849	13.205	1194	13.205	2242
13.21	324	13.21	181	13.21	344	13.21	273	13.21	308	13.21	165	13.21	2466	13.21	1655	13.21	560	13.21	635	13.21	1200	13.21	1886	13.21	1891	13.21	1249	13.21	2488
13.215	299	13.215	257	13.215	307	13.215	267	13.215	259	13.215	196	13.215	2502	13.215	1726	13.215	555	13.215	552	13.215	1224	13.215	1902	13.215	1856	13.215	1330	13.215	2564
13.22	257	13.22	294	13.22	308	13.22	238	13.22	107	13.22	197	13.22	2759	13.22	1702	13.22	545	13.22	643	13.22	1336	13.22	1805	13.22	1753	13.22	1261	13.22	2332
13.225	198	13.225	267	13.225	290	13.225	277	13.225	258	13.225	169	13.225	2988	13.225	1650	13.225	621	13.225	576	13.225	1341	13.225	1879	13.225	1637	13.225	1295	13.225	2219
13.23	197	13.23	337	13.23	322	13.23	170	13.23	262	13.23	191	13.23	2968	13.23	1673	13.23	680	13.23	523	13.23	1382	13.23	1940	13.23	1678	13.23	1288	13.23	2298
13.235	263	13.235	328	13.235	373	13.235	188	13.235	243	13.235	211	13.235	2916	13.235	1658	13.235	653	13.235	607	13.235	1478	13.235	1986	13.235	1892	13.235	1317	13.235	2300
13.24	317	13.24	416	13.24	393	13.24	324	13.24	258	13.24	193	13.24	2897	13.24	1724	13.24	656	13.24	715	13.24	1479	13.24	2128	13.24	1890	13.24	1474	13.24	2446
13.245	325	13.245	401	13.245	408	13.245	282	13.245	284	13.245	163	13.245	2966	13.245	1961	13.245	739	13.245	664	13.245	1577	13.245	2261	13.245	1915	13.245	1687	13.245	2739
13.25	295	13.25	252	13.25	404	13.25	349	13.25	144	13.25	173	13.25	3090	13.25	2174	13.25	868	13.25	647	13.25	1789	13.25	2299	13.25	2164	13.25	1778	13.25	2834
13.255	275	13.255	248	13.255	189	13.255	380	13.255	352	13.255	218	13.255	3158	13.255	2150	13.255	922	13.255	715	13.255	1764	13.255	2317	13.255	2206	13.255	1666	13.255	2832
13.26	206	13.26	171	13.26	199	13.26	359	13.26	322	13.26	210	13.26	3264	13.26	1951	13.26	907	13.26	757	13.26	1634	13.26	2252	13.26	1999	13.26	1485	13.26	2823
13.265	208	13.265	505	13.265	330	13.265	358	13.265	303	13.265	189	13.265	3262	13.265	1822	13.265	871	13.265	645	13.265	1638	13.265	2079	13.265	1881	13.265	1518	13.265	2743
13.27	326	13.27	574	13.27	279	13.27	296	13.27	315	13.27	220	13.27	3194	13.27	1873	13.27	776	13.27	669	13.27	1636	13.27	2009	13.27	1995	13.27	1563	13.27	2828
13.275	367	13.275	231	13.275	280	13.275	99	13.275	313	13.275	201	13.275	3236	13.275	1951	13.275	712	13.275	786	13.275	1568	13.275	2107	13.275	2111	13.275	1501	13.275	2967
13.28	287	13.28	342	13.28	347	13.28	111	13.28	323	13.28	129	13.28	3078	13.28	1828	13.28	680	13.28	771	13.28	1473	13.28	2107	13.28	2081	13.28	1502	13.28	2936
13.285	214	13.285	343	13.285	420	13.285	293	13.285	121	13.285	123	13.285	2819	13.285	1736	13.285	666	13.285	678	13.285	1498	13.285	1988	13.285	1987	13.285	1563	13.285	2947
13.29	200	13.29	325	13.29	410	13.29	371	13.29	139	13.29	205	13.29	2751	13.29	1830	13.29	694	13.29	633	13.29	1544	13.29	2014	13.29	1894	13.29	1534	13.29	2815
13.295	219	13.295	330	13.295	343	13.295	146	13.295	257	13.295	296	13.295	2619	13.295	1896	13.295	726	13.295	685	13.295	1586	13.295	2090	13.295	1834	13.295	1464	13.295	2560
13.3	200	13.3	203	13.3	353	13.3	156	13.3	261	13.3	304	13.3	2339	13.3	1803	13.3	768	13.3	696	13.3	1567	13.3	2075	13.3	1866	13.3	1480	13.3	2537
13.305	181	13.305	299	13.305	333	13.305	250	13.305	235	13.305	233	13.305	2402	13.305	2423	13.305	743	13.305	621	13.305	1411	13.305	2078	13.305	1958	13.305	1421	13.305	2524
13.31	256	13.31	211	13.31	147	13.31	282	13.31	224	13.31	190	13.31	2695	13.31	1905	13.31	656	13.31	589	13.31	1381	13.31	2126	13.31	1971	13.31	1333	13.31	2394
13.315	293	13.315	203	13.315	179	13.315	297	13.315	252	13.315	178	13.315	2783	13.315	1922	13.315	583	13.315	648	13.315	1473	13.315	2049	13.315	1918	13.315	1426	13.315	2384
13.32	264	13.32	533	13.32	399	13.32	318	13.32	244	13.32	179	13.32	2828	13.32	1833	13.32	540	13.32	635	13.32	1548	13.32	1946	13.32	1820	13.32	1445	13.32	2467
13.325	301	13.325	210	13.325	407	13.325	180	13.325	146	13.325	144	13.325	2891	13.325	1778	13.325	616	13.325	600	13.325	1497	13.325	1980	13.325	1796	13.325	1273	13.325	2506
13.33	339	13.33	200	13.33	317	13.33	355	13.33	169	13.33	155	13.33	3048	13.33	1750	13.33	682	13.33	595	13.33	1490	13.33	2015	13.33	1853	13.33	1310	13.33	2490
13.335	362	13.335	194	13.335	280	13.335	329	13.335	185	13.335	201	13.335	3147	13.335	2406	13.335	686	13.335	582	13.335	1474	13.335	2124	13.335	1877	13.335	1381	13.335	2618
13.34	345	13.34	160	13.34	354	13.34	295	13.34	386	13.34	205	13.34	3043	13.34	1848	13.34	717	13.34	497	13.34	1415	13.34	2220	13.34	1808	13.34	1471	13.34	2866
13.345	272	13.345	146	13.345	450	13.345	332	13.345	332	13.345	207	13.345	2905	13.345	1980	13.345	688	13.345	513	13.345	1497	13.345	2118	13.345	1730	13.345	1469	13.345	2772
13.35	210	13.35	150	13.35	339	13.35	407	13.35	286	13.35	231	13.35	2758	13.35	1964	13.35	677	13.35	575	13.35	1536	13.35	2019	13.35	1764	13.35	1398	13.35	2421
13.355	216	13.355	419	13.355	499	13.355	443	13.355	302	13.355	293	13.355	2649	13.355	1865	13.355	752	13.355	635	13.355	1512	13.355	1934	13.355	1750	13.355	1321	13.355	2377
13.36	250	13.36	191	13.36	678	13.36	437	13.36	342	13.36	339	13.36	2595	13.36	1772	13.36	751	13.36	670	13.36	1583	13.36	1915	13.36	1700	13.36	1475	13.36	2548
13.365	306	13.365	201	13.365	738	13.365	482	13.365	363	13.365	295	13.365	2604	13.365	1764	13.365	669	13.365	606	13.365	1492	13.365	1897	13.365	1693	13.365	1505	13.365	2561
13.37	290	13.37	223	13.37	773	13.37	522	13.37	333	13.37	241	13.37	2707	13.37	2604	13.37	639	13.37	564	13.37	1420	13.37	1893	13.37	1709	13.37	1421	13.37	2381
13.375	250	13.375	238	13.375	617	13.375	436	13.375	299	13.375	243	13.375	2753	13.375	2592	13.375	691	13.375	1621	13.375	1551	13.375	1965	13.375	1808	13.375	1480	13.375	2275
13.38	285	13.38	258	13.38	376	13.38	360	13.38	302	13.38	261	13.38	2712	13.38	1860	13.38	814	13.38	1535	13.38	1617	13.38	2025	13.38	2003	13.38	1667	13.38	2507
13.385	350	13.385	438	13.385	281	13.385	339	13.385	313	13.385	306	13.385	2803	13.385	1948	13.385	870	13.385	652	13.385	1721	13.385	2155	13.385	1990	13.385	1695	13.385	2660
13.39	308	13.39	240	13.39	468	13.39	299	13.39	316	13.39	267	13.39	3003	13.39	1916	13.39	799	13.39	699	13.39	1801	13.39	2149	13.39	1755	13.39	1547	13.39	2469
13.395	267	13.395	201	13.395	458	13.395	348	13.395	341	13.395	225	13.395	2934	13.395	1928	13.395	730	13.395	786	13.395	1720	13.395	1912	13.395	1742	13.395	1548	13.395	2400
13.4	282	13.4	240	13.4	438	13.4	419	13.4	177	13.4	274	13.4	2753	13.4	1972	13.4	703	13.4	723	13.4	1603	13.4	1720	13.4	1784	13.4	1626	13.4	2546
13.405	357	13.405	305	13.405	408	13.405	385	13.405	171	13.405	275	13.405	2608	13.405	1778	13.405	694	13.405	629	13.405	1481	13.405	1999	13.405	1728	13.405	1498	13.405	2643
13.41	430	13.41	316	13.41	401	13.41	293	13.41	147	13.41	237	13.41	2493	13.41	1754	13.41	720	13.41	654	13.41	1531	13.41	2221	13.41	1801	13.41	1386	13.41	2485
13.415	397	13.415	510	13.415	416	13.415	237	13.415	226	13.415	240	13.415	2659	13.415	1741	13.415	696	13.415	795	13.415	1635	13.415	2259	13.415	1899	13.415	1382	13.415	2320
13.42	388	13.42	504	13.42	440	13.42	296	13.42	277	13.42	238	13.42	2829	13.42	1699	13.42	642	13.42	940	13.42	1657	13.42	2365	13.42	1703	13.42	1396	13.42	2329
13.425	448	13.425	455	13.425	451	13.425	357	13.425	187	13.425	240	13.425	2804	13.425	2567	13.425	654	13.425	965	13.425	1584	13.425	2363	13.425	1501	13.425	1410	13.425	2461
13.43	451	13.43	220	13.43	408	13.43	399	13.43	136	13.43	293	13.43	2703	13.43	1893	13.43	668	13.43	997	13.43	1516	13.43	2178	13.43	1646	13.43	1448	13.43	2651
13.435	370	13.435	510	13.435	395	13.435	428	13.435	349	13.435	309	13.435	2674	13.435	1907	13.435	643	13.435	990	13.435	1481	13.435	1996	13.435	1910	13.435	1536	13.435	2841
13.44	411	13.44	400	13.44	435	13.44	405	13.44	381	13.44	293	13.44	2864	13.44	1847	13.44	605	13.44	893	13.44	1416	13.44	1892	13.44	1898	13.44	1679	13.44	2798
13.445	448	13.445	193	13.445	213	13.445	390	13.445	340	13.445	266	13.445	2970	13.445	1826	13.445	567	13.445	992	13.445	1462	13.445	1861	13.445	1737	13.445	1658	13.445	2495
13.45	320	13.45	195	13.45	245	13.45	383	13.45	316	13.45	242	13.45	2936	13.45	1908	13.45	646	13.45	628	13.45	1560	13.45	1904	13.45	1715	13.45	1533	13.45	2261
13.455	239	13.455	375	13.455	257	13.455	397	13.455	262	13.455	277	13.455	2888	13.455	2022	13.455	723	13.455	611	13.455	1573	13.455	2014	13.455	1786	13.455	1545	13.455	2264
13.46	208	13.46	220	13.46	231	13.46	370	13.46	319	13.46	291	13.46	2840	13.46	2004	13.46	715	13.46	847	13.46	1606	13.46	2163	13.46	1865	13.46	1602	13.46	2321
13.465	200	13.465	349	13.465	326	13.465	319	13.465	414	13.465	248	13.465	2977	13.465	1899	13.465	743	13.465	531	13.465	1589	13.465	2235	13.465	1962	13.465	1649	13.465	2300
13.47	242	13.47	189	13.47	380	13.47	342	13.47	360	13.47	235	13.47	3162	13.47	1939	13.47	787	13.47	525	13.47	1410	13.47	2157	13.47	2033	13.47	1658	13.47	2396
13.475	258	13.475	189	13.475	455	13.475	347	13.475	276	13.475	228	13.475	2980	13.475	1931	13.475	811	13.475	520	13.475	1322	13.475	2064	13.475	1878	13.475	1527	13.475	2493
13.48	280	13.48	197	13.48	230	13.48	371	13.48	231	13.48	250	13.48	2668	13.48	1837	13.48	798	13.48	473	13.48	1387	13.48	2142	13.48	1777	13.48	1436	13.48	2482
13.485	330	13.485	210	13.485	374	13.485	434	13.485	263	13.485	300	13.485	2667	13.485	1899	13.485	739	13.485	533	13.485	1368	13.485	2227	13.485	1904	13.485	1500	13.485	2490
[truncated: 902 more rows]

## Sheet: Supplementary Fig. 2
		Red lines frame the cropped areas. *, unrelated samples.

## Sheet: Supplementary Fig. 3a
		Percentage of WT
	enzyme name	triplicate-1	triplicate-2	triplicate-3	average
	BcABA3-FL	97.9828	100.129	102.397	100.17
	BcABA3	112.765	119.537	104.271	112.191
	RuABA3-FL	109.905	109.647	102.628	107.393
	RuABA3	126.372	114.772	134.303	125.149
	SkABA3	112.939	119.725	124.894	119.186

## Sheet: Supplementary Fig. 3b
BcABA3-FL		BcABA3		RuABA3-FL		RuABA3
Ret.Time	Absolute Intensity	Ret.Time	Absolute Intensity	Ret.Time	Absolute Intensity	Ret.Time	Absolute Intensity
3.5	0	3.5	0	3.5	0	3.5	0
3.505	-1123	3.505	-996	3.505	-975	3.505	-1000
3.51	163	3.51	214	3.51	164	3.51	193
3.515	436	3.515	321	3.515	316	3.515	280
3.52	674	3.52	483	3.52	495	3.52	479
3.525	815	3.525	587	3.525	488	3.525	581
3.53	978	3.53	626	3.53	488	3.53	611
3.535	1064	3.535	677	3.535	562	3.535	677
3.54	933	3.54	710	3.54	591	3.54	745
3.545	864	3.545	688	3.545	527	3.545	700
3.55	792	3.55	684	3.55	520	3.55	597
3.555	863	3.555	662	3.555	484	3.555	495
3.56	973	3.56	606	3.56	500	3.56	472
3.565	946	3.565	571	3.565	597	3.565	536
3.57	906	3.57	484	3.57	669	3.57	567
3.575	953	3.575	507	3.575	625	3.575	618
3.58	967	3.58	630	3.58	564	3.58	582
3.585	897	3.585	643	3.585	547	3.585	515
3.59	795	3.59	624	3.59	510	3.59	548
3.595	780	3.595	664	3.595	499	3.595	544
3.6	860	3.6	709	3.6	457	3.6	495
3.605	893	3.605	659	3.605	468	3.605	474
3.61	859	3.61	590	3.61	572	3.61	444
3.615	865	3.615	628	3.615	575	3.615	476
3.62	935	3.62	624	3.62	495	3.62	551
3.625	945	3.625	574	3.625	522	3.625	579
3.63	882	3.63	557	3.63	546	3.63	577
3.635	881	3.635	557	3.635	520	3.635	587
3.64	858	3.64	669	3.64	486	3.64	636
3.645	792	3.645	779	3.645	522	3.645	677
3.65	782	3.65	711	3.65	593	3.65	637
3.655	729	3.655	619	3.655	573	3.655	565
3.66	689	3.66	629	3.66	524	3.66	518
3.665	738	3.665	676	3.665	531	3.665	544
3.67	761	3.67	693	3.67	535	3.67	653
3.675	808	3.675	615	3.675	528	3.675	694
3.68	903	3.68	529	3.68	576	3.68	630
3.685	894	3.685	576	3.685	592	3.685	587
3.69	814	3.69	648	3.69	550	3.69	572
3.695	805	3.695	629	3.695	589	3.695	543
3.7	870	3.7	663	3.7	674	3.7	557
3.705	833	3.705	716	3.705	652	3.705	598
3.71	758	3.71	708	3.71	569	3.71	588
3.715	779	3.715	725	3.715	560	3.715	551
3.72	854	3.72	762	3.72	585	3.72	550
3.725	939	3.725	816	3.725	574	3.725	568
3.73	901	3.73	756	3.73	581	3.73	626
3.735	842	3.735	608	3.735	563	3.735	675
3.74	936	3.74	588	3.74	524	3.74	594
3.745	979	3.745	680	3.745	577	3.745	524
3.75	890	3.75	735	3.75	638	3.75	543
3.755	878	3.755	698	3.755	638	3.755	542
3.76	835	3.76	766	3.76	638	3.76	582
3.765	706	3.765	823	3.765	649	3.765	609
3.77	714	3.77	703	3.77	590	3.77	582
3.775	837	3.775	616	3.775	477	3.775	577
3.78	919	3.78	642	3.78	456	3.78	606
3.785	898	3.785	635	3.785	568	3.785	659
3.79	846	3.79	612	3.79	655	3.79	661
3.795	831	3.795	640	3.795	609	3.795	540
3.8	774	3.8	665	3.8	521	3.8	496
3.805	708	3.805	599	3.805	511	3.805	581
3.81	739	3.81	516	3.81	553	3.81	573
3.815	792	3.815	535	3.815	615	3.815	480
3.82	812	3.82	566	3.82	664	3.82	504
3.825	843	3.825	550	3.825	670	3.825	605
3.83	873	3.83	570	3.83	672	3.83	597
3.835	887	3.835	639	3.835	664	3.835	602
3.84	903	3.84	726	3.84	671	3.84	669
3.845	863	3.845	778	3.845	607	3.845	669
3.85	812	3.85	749	3.85	570	3.85	628
3.855	799	3.855	632	3.855	641	3.855	600
3.86	754	3.86	554	3.86	663	3.86	566
3.865	709	3.865	601	3.865	703	3.865	571
3.87	697	3.87	715	3.87	683	3.87	593
3.875	747	3.875	771	3.875	572	3.875	581
3.88	805	3.88	753	3.88	607	3.88	532
3.885	820	3.885	685	3.885	681	3.885	549
3.89	855	3.89	672	3.89	661	3.89	636
3.895	866	3.895	719	3.895	582	3.895	685
3.9	793	3.9	774	3.9	607	3.9	667
3.905	778	3.905	859	3.905	590	3.905	583
3.91	781	3.91	883	3.91	609	3.91	688
3.915	709	3.915	870	3.915	702	3.915	713
3.92	723	3.92	897	3.92	725	3.92	610
3.925	752	3.925	890	3.925	752	3.925	557
3.93	751	3.93	848	3.93	790	3.93	607
3.935	783	3.935	882	3.935	748	3.935	696
3.94	720	3.94	894	3.94	789	3.94	672
3.945	674	3.945	846	3.945	843	3.945	670
3.95	724	3.95	827	3.95	816	3.95	689
3.955	760	3.955	888	3.955	773	3.955	717
3.96	798	3.96	1022	3.96	787	3.96	669
3.965	833	3.965	996	3.965	770	3.965	590
3.97	841	3.97	957	3.97	631	3.97	658
3.975	908	3.975	1082	3.975	598	3.975	725
3.98	825	3.98	1061	3.98	701	3.98	663
3.985	701	3.985	948	3.985	816	3.985	629
3.99	660	3.99	1009	3.99	816	3.99	697
3.995	603	3.995	1041	3.995	776	3.995	795
4	593	4	895	4	817	4	805
4.005	694	4.005	794	4.005	791	4.005	829
4.01	776	4.01	944	4.01	700	4.01	910
4.015	882	4.015	1078	4.015	731	4.015	860
4.02	939	4.02	983	4.02	792	4.02	829
4.025	903	4.025	909	4.025	770	4.025	793
4.03	795	4.03	1050	4.03	750	4.03	662
4.035	732	4.035	1214	4.035	798	4.035	668
4.04	720	4.04	1178	4.04	847	4.04	710
4.045	658	4.045	1067	4.045	875	4.045	677
4.05	651	4.05	1031	4.05	840	4.05	740
4.055	756	4.055	962	4.055	844	4.055	920
4.06	769	4.06	954	4.06	936	4.06	969
4.065	743	4.065	1002	4.065	919	4.065	828
4.07	676	4.07	994	4.07	817	4.07	737
4.075	711	4.075	1028	4.075	816	4.075	785
4.08	750	4.08	1037	4.08	808	4.08	855
4.085	898	4.085	1022	4.085	782	4.085	883
4.09	942	4.09	1114	4.09	874	4.09	863
4.095	865	4.095	1225	4.095	950	4.095	712
4.1	827	4.1	1224	4.1	949	4.1	637
4.105	869	4.105	1203	4.105	901	4.105	723
4.11	828	4.11	1230	4.11	885	4.11	776
4.115	738	4.115	1259	4.115	929	4.115	773
4.12	733	4.12	1200	4.12	946	4.12	774
4.125	772	4.125	1071	4.125	945	4.125	853
4.13	789	4.13	1097	4.13	944	4.13	922
4.135	799	4.135	1183	4.135	983	4.135	914
4.14	818	4.14	1170	4.14	997	4.14	937
4.145	847	4.145	1171	4.145	1042	4.145	900
4.15	897	4.15	1189	4.15	1124	4.15	757
4.155	1017	4.155	1246	4.155	1061	4.155	714
4.16	1044	4.16	1277	4.16	909	4.16	834
4.165	895	4.165	1228	4.165	925	4.165	912
4.17	809	4.17	1176	4.17	987	4.17	835
4.175	858	4.175	1265	4.175	980	4.175	934
4.18	952	4.18	1503	4.18	1004	4.18	1068
4.185	971	4.185	1536	4.185	1103	4.185	1099
4.19	998	4.19	1478	4.19	1130	4.19	963
4.195	922	4.195	1529	4.195	1058	4.195	761
4.2	909	4.2	1593	4.2	1026	4.2	680
4.205	979	4.205	1640	4.205	1040	4.205	725
4.21	1040	4.21	1698	4.21	1003	4.21	832
4.215	1023	4.215	1672	4.215	957	4.215	928
4.22	951	4.22	1544	4.22	986	4.22	980
4.225	1000	4.225	1564	4.225	1051	4.225	923
4.23	1117	4.23	1550	4.23	1035	4.23	826
4.235	1147	4.235	1487	4.235	1048	4.235	886
4.24	987	4.24	1492	4.24	1110	4.24	907
4.245	927	4.245	1585	4.245	992	4.245	828
4.25	928	4.25	1544	4.25	867	4.25	821
4.255	998	4.255	1464	4.255	891	4.255	929
4.26	1003	4.26	1434	4.26	989	4.26	992
4.265	990	4.265	1428	4.265	1104	4.265	968
4.27	1079	4.27	1420	4.27	1136	4.27	896
4.275	1161	4.275	1455	4.275	1095	4.275	998
4.28	1140	4.28	1674	4.28	1190	4.28	962
4.285	1226	4.285	1565	4.285	1316	4.285	814
4.29	1266	4.29	1572	4.29	1238	4.29	855
4.295	1184	4.295	1661	4.295	1172	4.295	992
4.3	1204	4.3	1727	4.3	1207	4.3	961
4.305	1181	4.305	1733	4.305	1245	4.305	899
4.31	1058	4.31	1734	4.31	1290	4.31	927
4.315	942	4.315	1664	4.315	1255	4.315	992
4.32	1001	4.32	1611	4.32	1193	4.32	1034
4.325	1206	4.325	1677	4.325	1125	4.325	1015
4.33	1212	4.33	1639	4.33	1168	4.33	1013
4.335	1149	4.335	1475	4.335	1174	4.335	1043
4.34	1096	4.34	1477	4.34	1156	4.34	1060
4.345	1088	4.345	1526	4.345	1251	4.345	1021
4.35	1173	4.35	1558	4.35	1314	4.35	970
4.355	1178	4.355	1563	4.355	1275	4.355	1018
4.36	1192	4.36	1673	4.36	1153	4.36	1061
4.365	1375	4.365	1803	4.365	1042	4.365	1040
4.37	1512	4.37	1760	4.37	1050	4.37	990
4.375	1428	4.375	1601	4.375	1103	4.375	915
4.38	1302	4.38	1531	4.38	1114	4.38	896
4.385	1256	4.385	1526	4.385	1159	4.385	1021
4.39	1305	4.39	1561	4.39	1198	4.39	1230
4.395	1348	4.395	1638	4.395	1149	4.395	1211
4.4	1228	4.4	1523	4.4	1072	4.4	1092
4.405	1124	4.405	1511	4.405	1156	4.405	1081
4.41	1118	4.41	1552	4.41	1336	4.41	964
4.415	1068	4.415	1741	4.415	1363	4.415	860
4.42	1157	4.42	1691	4.42	1361	4.42	895
4.425	1290	4.425	1627	4.425	1467	4.425	1018
4.43	1265	4.43	1467	4.43	1445	4.43	1078
4.435	1291	4.435	1403	4.435	1307	4.435	1081
4.44	1283	4.44	1464	4.44	1138	4.44	1094
4.445	1167	4.445	1560	4.445	1200	4.445	1075
4.45	1097	4.45	1844	4.45	1405	4.45	1086
4.455	1161	4.455	1891	4.455	1296	4.455	1081
4.46	1269	4.46	1842	4.46	1230	4.46	1019
4.465	1307	4.465	1845	4.465	1333	4.465	1008
4.47	1252	4.47	1716	4.47	1308	4.47	1063
4.475	1180	4.475	1551	4.475	1291	4.475	1070
4.48	1205	4.48	1728	4.48	1317	4.48	1000
4.485	1296	4.485	1698	4.485	1213	4.485	1046
4.49	1339	4.49	1689	4.49	1036	4.49	1183
4.495	1172	4.495	1870	4.495	1172	4.495	1208
4.5	1136	4.5	1984	4.5	1353	4.5	1189
4.505	1138	4.505	1900	4.505	1444	4.505	1143
4.51	1136	4.51	1848	4.51	1402	4.51	1061
4.515	1285	4.515	1737	4.515	1349	4.515	1071
4.52	1400	4.52	1664	4.52	1216	4.52	1111
4.525	1437	4.525	1651	4.525	1060	4.525	1180
4.53	1443	4.53	1655	4.53	1142	4.53	1208
4.535	1343	4.535	1608	4.535	1354	4.535	1122
4.54	1334	4.54	1785	4.54	1389	4.54	1041
4.545	1279	4.545	1896	4.545	1288	4.545	1001
4.55	1206	4.55	1908	4.55	1189	4.55	956
4.555	1241	4.555	1785	4.555	1183	4.555	974
4.56	1349	4.56	1679	4.56	1315	4.56	1011
4.565	1451	4.565	1721	4.565	1441	4.565	987
4.57	1603	4.57	1757	4.57	1481	4.57	983
4.575	1727	4.575	1753	4.575	1443	4.575	1051
4.58	1830	4.58	1699	4.58	1390	4.58	1135
4.585	1831	4.585	1553	4.585	1416	4.585	1089
4.59	1692	4.59	1571	4.59	1458	4.59	991
4.595	1516	4.595	1807	4.595	1410	4.595	1059
4.6	1444	4.6	1791	4.6	1320	4.6	1198
4.605	1546	4.605	1604	4.605	1221	4.605	1190
4.61	1661	4.61	1677	4.61	1222	4.61	1137
4.615	1709	4.615	1898	4.615	1283	4.615	1098
4.62	1703	4.62	1933	4.62	1351	4.62	1082
4.625	1644	4.625	1803	4.625	1358	4.625	1130
4.63	1691	4.63	1744	4.63	1302	4.63	1176
4.635	1862	4.635	1830	4.635	1357	4.635	1081
4.64	2005	4.64	1984	4.64	1372	4.64	1034
4.645	1911	4.645	1860	4.645	1273	4.645	975
4.65	1809	4.65	1620	4.65	1255	4.65	989
4.655	1754	4.655	1638	4.655	1135	4.655	1114
4.66	1769	4.66	1847	4.66	1126	4.66	1103
4.665	1796	4.665	1951	4.665	1171	4.665	920
4.67	1808	4.67	1785	4.67	1276	4.67	815
4.675	1906	4.675	1641	4.675	1386	4.675	865
4.68	1878	4.68	1666	4.68	1511	4.68	963
4.685	1770	4.685	1708	4.685	1601	4.685	994
4.69	1771	4.69	1792	4.69	1475	4.69	1050
4.695	2037	4.695	1761	4.695	1354	4.695	1110
4.7	2087	4.7	1733	4.7	1289	4.7	1088
4.705	1927	4.705	1818	4.705	1171	4.705	1093
4.71	1903	4.71	1737	4.71	1136	4.71	1125
4.715	2009	4.715	1551	4.715	1180	4.715	1056
4.72	2026	4.72	1599	4.72	1279	4.72	1069
4.725	1978	4.725	1768	4.725	1298	4.725	1104
4.73	1956	4.73	1772	4.73	1193	4.73	1152
4.735	1943	4.735	1700	4.735	1164	4.735	1218
4.74	1917	4.74	1727	4.74	1287	4.74	1217
4.745	1941	4.745	1774	4.745	1318	4.745	1261
4.75	2000	4.75	1744	4.75	1134	4.75	1200
4.755	2037	4.755	1670	4.755	1220	4.755	976
4.76	2133	4.76	1641	4.76	1333	4.76	990
4.765	2251	4.765	1694	4.765	1271	4.765	1203
4.77	2217	4.77	1804	4.77	1230	4.77	1191
4.775	2080	4.775	1839	4.775	1292	4.775	1127
4.78	2043	4.78	1788	4.78	1389	4.78	1062
4.785	2225	4.785	1805	4.785	1386	4.785	991
4.79	2320	4.79	1739	4.79	1378	4.79	1001
4.795	2270	4.795	1698	4.795	1414	4.795	974
4.8	2350	4.8	1598	4.8	1458	4.8	1034
4.805	2388	4.805	1548	4.805	1542	4.805	1187
4.81	2296	4.81	1647	4.81	1634	4.81	1165
4.815	2281	4.815	1701	4.815	1564	4.815	1166
4.82	2301	4.82	1828	4.82	1398	4.82	1218
4.825	2383	4.825	1822	4.825	1299	4.825	1126
4.83	2424	4.83	1747	4.83	1121	4.83	1057
4.835	2428	4.835	1657	4.835	1135	4.835	989
4.84	2506	4.84	1583	4.84	1216	4.84	1007
4.845	2553	4.845	1647	4.845	1312	4.845	1008
4.85	2401	4.85	1725	4.85	1337	4.85	1051
4.855	2175	4.855	1682	4.855	1296	4.855	1131
4.86	2109	4.86	1581	4.86	1269	4.86	1088
4.865	2266	4.865	1452	4.865	1289	4.865	1062
4.87	2368	4.87	1443	4.87	1326	4.87	1126
4.875	2465	4.875	1665	4.875	1314	4.875	1094
4.88	2484	4.88	1839	4.88	1205	4.88	1130
4.885	2527	4.885	1691	4.885	1117	4.885	1186
4.89	2623	4.89	1661	4.89	1203	4.89	1090
4.895	2559	4.895	1648	4.895	1355	4.895	1086
4.9	2307	4.9	1527	4.9	1352	4.9	1178
4.905	2199	4.905	1635	4.905	1311	4.905	1212
4.91	2130	4.91	1730	4.91	1385	4.91	1119
4.915	2161	4.915	1805	4.915	1299	4.915	1045
4.92	2450	4.92	1804	4.92	1163	4.92	1112
4.925	2636	4.925	1741	4.925	1237	4.925	1175
4.93	2571	4.93	1783	4.93	1325	4.93	1128
4.935	2504	4.935	1811	4.935	1375	4.935	1014
4.94	2564	4.94	1724	4.94	1358	4.94	993
4.945	2583	4.945	1725	4.945	1357	4.945	1097
4.95	2409	4.95	1746	4.95	1364	4.95	1147
4.955	2324	4.955	1687	4.955	1365	4.955	1116
4.96	2355	4.96	1670	4.96	1323	4.96	1009
4.965	2447	4.965	1647	4.965	1262	4.965	1006
4.97	2500	4.97	1647	4.97	1238	4.97	1013
4.975	2269	4.975	1629	4.975	1244	4.975	970
4.98	2348	4.98	1597	4.98	1376	4.98	968
4.985	2546	4.985	1690	4.985	1432	4.985	966
4.99	2463	4.99	1807	4.99	1389	4.99	1129
4.995	2397	4.995	1777	4.995	1284	4.995	1325
5	2428	5	1640	5	1238	5	1187
5.005	2391	5.005	1530	5.005	1088	5.005	1063
5.01	2329	5.01	1616	5.01	1064	5.01	1103
5.015	2330	5.015	1781	5.015	1268	5.015	1162
5.02	2441	5.02	1740	5.02	1386	5.02	1176
5.025	2511	5.025	1690	5.025	1384	5.025	1083
5.03	2538	5.03	1702	5.03	1334	5.03	1125
5.035	2548	5.035	1677	5.035	1345	5.035	1155
5.04	2551	5.04	1729	5.04	1354	5.04	1073
5.045	2447	5.045	1754	5.045	1327	5.045	1057
5.05	2550	5.05	1696	5.05	1419	5.05	1122
5.055	2763	5.055	1768	5.055	1475	5.055	1197
5.06	2747	5.06	1860	5.06	1379	5.06	1176
5.065	2627	5.065	1786	5.065	1304	5.065	1143
5.07	2466	5.07	1661	5.07	1380	5.07	1225
5.075	2316	5.075	1563	5.075	1543	5.075	1176
5.08	2352	5.08	1446	5.08	1549	5.08	1023
5.085	2430	5.085	1485	5.085	1384	5.085	1035
5.09	2475	5.09	1564	5.09	1327	5.09	1161
5.095	2422	5.095	1721	5.095	1328	5.095	1229
5.1	2498	5.1	1715	5.1	1312	5.1	1186
5.105	2591	5.105	1637	5.105	1362	5.105	1195
5.11	2544	5.11	1743	5.11	1346	5.11	1305
5.115	2649	5.115	1768	5.115	1337	5.115	1357
5.12	2749	5.12	1735	5.12	1388	5.12	1199
5.125	2722	5.125	1755	5.125	1366	5.125	1015
5.13	2734	5.13	1853	5.13	1321	5.13	1046
5.135	2675	5.135	1889	5.135	1299	5.135	1149
5.14	2541	5.14	1782	5.14	1248	5.14	1179
5.145	2540	5.145	1688	5.145	1263	5.145	1179
5.15	2613	5.15	1715	5.15	1325	5.15	1218
5.155	2739	5.155	1800	5.155	1379	5.155	1279
5.16	2751	5.16	1848	5.16	1459	5.16	1293
5.165	2593	5.165	1857	5.165	1534	5.165	1296
5.17	2580	5.17	1873	5.17	1527	5.17	1340
5.175	2709	5.175	1933	5.175	1518	5.175	1331
5.18	2915	5.18	1955	5.18	1521	5.18	1275
5.185	3052	5.185	2012	5.185	1377	5.185	1237
5.19	2955	5.19	1971	5.19	1323	5.19	1259
5.195	2773	5.195	1862	5.195	1439	5.195	1322
5.2	2671	5.2	1902	5.2	1395	5.2	1348
5.205	2686	5.205	2161	5.205	1352	5.205	1323
5.21	2597	5.21	2233	5.21	1406	5.21	1245
5.215	2514	5.215	2027	5.215	1532	5.215	1115
5.22	2573	5.22	1951	5.22	1417	5.22	1180
5.225	2666	5.225	1971	5.225	1310	5.225	1371
5.23	2769	5.23	1801	5.23	1413	5.23	1336
5.235	2906	5.235	1824	5.235	1412	5.235	1263
5.24	2835	5.24	2155	5.24	1275	5.24	1326
5.245	2647	5.245	2361	5.245	1288	5.245	1284
5.25	2709	5.25	2358	5.25	1418	5.25	1137
5.255	2917	5.255	2228	5.255	1458	5.255	1238
5.26	2917	5.26	2059	5.26	1459	5.26	1414
5.265	2851	5.265	1894	5.265	1692	5.265	1355
5.27	2937	5.27	1919	5.27	1726	5.27	1288
5.275	2986	5.275	2047	5.275	1531	5.275	1279
5.28	2897	5.28	2046	5.28	1381	5.28	1166
5.285	2916	5.285	2124	5.285	1365	5.285	1160
5.29	2931	5.29	2277	5.29	1428	5.29	1284
5.295	2889	5.295	2258	5.295	1590	5.295	1306
5.3	2921	5.3	2181	5.3	1841	5.3	1219
5.305	3026	5.305	2165	5.305	1853	5.305	1187
5.31	3135	5.31	2258	5.31	1703	5.31	1246
5.315	3024	5.315	2259	5.315	1684	5.315	1225
5.32	2865	5.32	2099	5.32	1659	5.32	1169
5.325	2884	5.325	2104	5.325	1535	5.325	1288
5.33	2932	5.33	2123	5.33	1451	5.33	1290
5.335	3013	5.335	1938	5.335	1360	5.335	1326
5.34	3115	5.34	1962	5.34	1436	5.34	1428
5.345	3211	5.345	2293	5.345	1571	5.345	1393
5.35	3411	5.35	2504	5.35	1829	5.35	1377
5.355	3402	5.355	2440	5.355	1881	5.355	1413
5.36	3274	5.36	2395	5.36	1924	5.36	1440
5.365	3460	5.365	2417	5.365	1924	5.365	1451
5.37	3719	5.37	2535	5.37	1796	5.37	1449
5.375	3905	5.375	2877	5.375	1836	5.375	1519
5.38	4064	5.38	3113	5.38	2030	5.38	1664
5.385	4337	5.385	3156	5.385	2136	5.385	1788
5.39	4488	5.39	3262	5.39	2048	5.39	1729
5.395	4340	5.395	3349	5.395	1966	5.395	1623
5.4	4388	5.4	3399	5.4	1958	5.4	1786
5.405	4660	5.405	3623	5.405	2071	5.405	1957
5.41	4800	5.41	4101	5.41	2231	5.41	2016
5.415	4905	5.415	4423	5.415	2194	5.415	2357
5.42	5177	5.42	4471	5.42	2016	5.42	2611
5.425	5417	5.425	4530	5.425	2100	5.425	2660
5.43	5550	5.43	4864	5.43	2368	5.43	2838
5.435	5672	5.435	5367	5.435	2529	5.435	2915
5.44	5618	5.44	5576	5.44	2569	5.44	2910
5.445	5396	5.445	5587	5.445	2544	5.445	3089
5.45	5518	5.45	5575	5.45	2721	5.45	3151
5.455	5962	5.455	5623	5.455	2881	5.455	3134
5.46	6213	5.46	5725	5.46	2749	5.46	3247
5.465	6307	5.465	5931	5.465	2730	5.465	3287
5.47	6303	5.47	5982	5.47	2854	5.47	3193
5.475	6249	5.475	5667	5.475	2955	5.475	3182
5.48	6208	5.48	5437	5.48	3089	5.48	3222
5.485	5901	5.485	5316	5.485	3057	5.485	3150
5.49	5690	5.49	5260	5.49	2901	5.49	3288
5.495	5806	5.495	5273	5.495	2996	5.495	3387
5.5	5819	5.5	5267	5.5	3153	5.5	3269
5.505	5681	5.505	5230	5.505	3117	5.505	3183
5.51	5905	5.51	5149	5.51	3070	5.51	3208
5.515	6413	5.515	5159	5.515	3116	5.515	3170
5.52	6406	5.52	5291	5.52	3221	5.52	3139
5.525	6099	5.525	5269	5.525	3281	5.525	3080
5.53	5993	5.53	4930	5.53	3115	5.53	2958
5.535	5817	5.535	4604	5.535	2845	5.535	3064
5.54	5491	5.54	4725	5.54	2892	5.54	3183
5.545	5378	5.545	4952	5.545	3147	5.545	3087
5.55	5529	5.55	5012	5.55	3277	5.55	3046
5.555	5637	5.555	5014	5.555	3345	5.555	3040
5.56	5724	5.56	4806	5.56	3277	5.56	2966
5.565	5817	5.565	4523	5.565	2919	5.565	2980
5.57	5733	5.57	4524	5.57	2752	5.57	3067
5.575	5614	5.575	4640	5.575	2866	5.575	2887
5.58	5594	5.58	4670	5.58	2833	5.58	2709
5.585	5492	5.585	4525	5.585	2829	5.585	2664
5.59	5523	5.59	4359	5.59	2971	5.59	2687
5.595	5746	5.595	4274	5.595	2989	5.595	2889
5.6	5663	5.6	4233	5.6	2939	5.6	2969
5.605	5276	5.605	4250	5.605	2978	5.605	2696
5.61	5202	5.61	4088	5.61	2961	5.61	2485
5.615	5301	5.615	3904	5.615	3003	5.615	2593
5.62	5186	5.62	4120	5.62	3133	5.62	2791
5.625	5069	5.625	4319	5.625	3160	5.625	2713
5.63	5137	5.63	4117	5.63	3145	5.63	2488
5.635	5101	5.635	4017	5.635	3113	5.635	2500
5.64	5091	5.64	4046	5.64	2967	5.64	2523
5.645	4994	5.645	3739	5.645	2827	5.645	2490
5.65	4825	5.65	3496	5.65	2784	5.65	2546
5.655	4960	5.655	3537	5.655	2835	5.655	2597
5.66	5027	5.66	3546	5.66	2876	5.66	2543
5.665	4949	5.665	3561	5.665	2749	5.665	2376
5.67	4919	5.67	3646	5.67	2636	5.67	2234
5.675	4787	5.675	3764	5.675	2553	5.675	2215
5.68	4696	5.68	3823	5.68	2562	5.68	2227
5.685	4631	5.685	3736	5.685	2618	5.685	2129
5.69	4498	5.69	3522	5.69	2593	5.69	2075
5.695	4491	5.695	3273	5.695	2629	5.695	2154
5.7	4781	5.7	3350	5.7	2700	5.7	2147
5.705	4842	5.705	3525	5.705	2647	5.705	2127
5.71	4630	5.71	3404	5.71	2478	5.71	2137
5.715	4555	5.715	3381	5.715	2430	5.715	2162
5.72	4386	5.72	3414	5.72	2424	5.72	2106
5.725	4039	5.725	3151	5.725	2359	5.725	1948
5.73	3560	5.73	2907	5.73	2391	5.73	1759
5.735	2942	5.735	2685	5.735	2336	5.735	1549
5.74	2420	5.74	2362	5.74	2035	5.74	1356
5.745	1771	5.745	1893	5.745	1651	5.745	1231
5.75	1333	5.75	1406	5.75	1280	5.75	1130
5.755	1267	5.755	1158	5.755	984	5.755	955
5.76	1374	5.76	1032	5.76	764	5.76	807
5.765	1395	5.765	963	5.765	814	5.765	769
5.77	1274	5.77	968	5.77	837	5.77	728
5.775	1234	5.775	917	5.775	843	5.775	655
5.78	1207	5.78	844	5.78	760	5.78	688
5.785	1111	5.785	666	5.785	782	5.785	621
5.79	1095	5.79	589	5.79	724	5.79	563
5.795	1117	5.795	684	5.795	595	5.795	573
5.8	987	5.8	904	5.8	538	5.8	578
5.805	936	5.805	904	5.805	667	5.805	572
5.81	1136	5.81	655	5.81	788	5.81	610
5.815	1100	5.815	627	5.815	771	5.815	636
5.82	1024	5.82	652	5.82	755	5.82	630
5.825	953	5.825	700	5.825	803	5.825	724
5.83	922	5.83	721	5.83	782	5.83	762
5.835	961	5.835	777	5.835	750	5.835	635
5.84	1102	5.84	830	5.84	715	5.84	560
5.845	1135	5.845	963	5.845	649	5.845	578
5.85	1062	5.85	978	5.85	643	5.85	615
5.855	1051	5.855	706	5.855	692	5.855	622
5.86	1028	5.86	654	5.86	719	5.86	583
5.865	976	5.865	802	5.865	687	5.865	524
5.87	988	5.87	842	5.87	681	5.87	522
5.875	1030	5.875	799	5.875	704	5.875	599
5.88	1077	5.88	765	5.88	714	5.88	655
5.885	1038	5.885	758	5.885	754	5.885	627
5.89	1132	5.89	729	5.89	740	5.89	575
5.895	1179	5.895	835	5.895	722	5.895	577
5.9	1105	5.9	918	5.9	696	5.9	589
5.905	1045	5.905	834	5.905	771	5.905	671
5.91	1023	5.91	755	5.91	781	5.91	713
5.915	929	5.915	744	5.915	767	5.915	628
5.92	964	5.92	791	5.92	702	5.92	554
5.925	1075	5.925	839	5.925	698	5.925	523
5.93	1071	5.93	790	5.93	719	5.93	507
5.935	1060	5.935	710	5.935	678	5.935	529
5.94	1065	5.94	761	5.94	649	5.94	590
5.945	1026	5.945	739	5.945	702	5.945	674
5.95	1090	5.95	640	5.95	649	5.95	642
5.955	1021	5.955	679	5.955	564	5.955	547
5.96	1025	5.96	707	5.96	664	5.96	523
5.965	971	5.965	684	5.965	727	5.965	546
5.97	974	5.97	698	5.97	639	5.97	582
5.975	1033	5.975	763	5.975	518	5.975	595
5.98	1153	5.98	711	5.98	490	5.98	639
5.985	1089	5.985	678	5.985	583	5.985	652
5.99	946	5.99	753	5.99	728	5.99	596
5.995	898	5.995	856	5.995	762	5.995	612
6	950	6	895	6	680	6	663
6.005	1048	6.005	716	6.005	683	6.005	651
6.01	1021	6.01	638	6.01	632	6.01	646
6.015	1109	6.015	734	6.015	705	6.015	657
6.02	1241	6.02	770	6.02	755	6.02	637
6.025	1172	6.025	757	6.025	778	6.025	574
6.03	1186	6.03	783	6.03	782	6.03	567
6.035	1267	6.035	807	6.035	706	6.035	676
6.04	1104	6.04	798	6.04	645	6.04	689
6.045	925	6.045	783	6.045	701	6.045	628
6.05	1004	6.05	805	6.05	774	6.05	614
6.055	1091	6.055	777	6.055	794	6.055	639
6.06	1129	6.06	718	6.06	875	6.06	701
6.065	1169	6.065	689	6.065	942	6.065	680
6.07	1166	6.07	727	6.07	839	6.07	590
6.075	1192	6.075	710	6.075	754	6.075	593
6.08	1119	6.08	746	6.08	747	6.08	588
6.085	1060	6.085	824	6.085	674	6.085	550
6.09	1004	6.09	843	6.09	666	6.09	615
6.095	997	6.095	786	6.095	737	6.095	698
6.1	1177	6.1	752	6.1	739	6.1	613
6.105	1201	6.105	730	6.105	680	6.105	646
6.11	950	6.11	722	6.11	712	6.11	567
6.115	870	6.115	683	6.115	765	6.115	594
6.12	984	6.12	753	6.12	699	6.12	616
6.125	1017	6.125	798	6.125	678	6.125	685
6.13	1027	6.13	704	6.13	707	6.13	624
6.135	1146	6.135	699	6.135	708	6.135	517
6.14	1238	6.14	756	6.14	696	6.14	487
6.145	1174	6.145	715	6.145	686	6.145	604
6.15	1008	6.15	706	6.15	701	6.15	743
6.155	1045	6.155	772	6.155	698	6.155	787
6.16	1074	6.16	705	6.16	708	6.16	766
6.165	1089	6.165	721	6.165	769	6.165	705
6.17	1153	6.17	711	6.17	747	6.17	705
6.175	1275	6.175	635	6.175	720	6.175	697
6.18	1269	6.18	585	6.18	778	6.18	657
6.185	1245	6.185	624	6.185	787	6.185	693
6.19	1366	6.19	718	6.19	761	6.19	708
6.195	1285	6.195	755	6.195	778	6.195	685
6.2	1140	6.2	785	6.2	771	6.2	709
6.205	1314	6.205	834	6.205	730	6.205	655
6.21	1274	6.21	901	6.21	752	6.21	536
6.215	1205	6.215	891	6.215	802	6.215	571
6.22	1323	6.22	800	6.22	773	6.22	653
6.225	1364	6.225	726	6.225	792	6.225	668
6.23	1395	6.23	724	6.23	871	6.23	672
6.235	1267	6.235	811	6.235	846	6.235	728
6.24	1138	6.24	860	6.24	819	6.24	810
6.245	1168	6.245	820	6.245	814	6.245	765
6.25	1388	6.25	921	6.25	774	6.25	672
6.255	1412	6.255	1038	6.255	790	6.255	688
6.26	1283	6.26	949	6.26	784	6.26	781
6.265	1286	6.265	821	6.265	737	6.265	727
6.27	1342	6.27	798	6.27	714	6.27	656
6.275	1295	6.275	721	6.275	752	6.275	710
6.28	1363	6.28	738	6.28	769	6.28	649
6.285	1337	6.285	773	6.285	778	6.285	654
6.29	1248	6.29	830	6.29	800	6.29	756
6.295	1119	6.295	732	6.295	791	6.295	707
6.3	985	6.3	610	6.3	816	6.3	673
6.305	1007	6.305	682	6.305	943	6.305	721
6.31	1091	6.31	873	6.31	964	6.31	661
6.315	1133	6.315	758	6.315	830	6.315	546
6.32	1128	6.32	707	6.32	800	6.32	546
6.325	1042	6.325	705	6.325	829	6.325	627
6.33	1103	6.33	600	6.33	784	6.33	663
6.335	1003	6.335	582	6.335	646	6.335	567
6.34	1036	6.34	646	6.34	562	6.34	526
6.345	1055	6.345	691	6.345	606	6.345	663
6.35	1071	6.35	725	6.35	629	6.35	704
6.355	961	6.355	701	6.355	650	6.355	616
6.36	863	6.36	623	6.36	687	6.36	552
6.365	900	6.365	581	6.365	637	6.365	544
6.37	1028	6.37	636	6.37	528	6.37	585
6.375	1046	6.375	723	6.375	557	6.375	597
6.38	1020	6.38	711	6.38	669	6.38	542
6.385	922	6.385	666	6.385	697	6.385	531
6.39	858	6.39	640	6.39	702	6.39	540
6.395	885	6.395	717	6.395	614	6.395	553
6.4	1026	6.4	915	6.4	524	6.4	602
6.405	1033	6.405	920	6.405	610	6.405	604
6.41	1027	6.41	725	6.41	653	6.41	623
6.415	935	6.415	675	6.415	566	6.415	602
6.42	922	6.42	734	6.42	513	6.42	573
6.425	1022	6.425	739	6.425	555	6.425	641
6.43	1054	6.43	684	6.43	621	6.43	637
6.435	991	6.435	730	6.435	652	6.435	651
6.44	974	6.44	837	6.44	701	6.44	688
6.445	940	6.445	801	6.445	736	6.445	626
6.45	880	6.45	699	6.45	685	6.45	619
6.455	897	6.455	696	6.455	662	6.455	649
6.46	987	6.46	796	6.46	626	6.46	685
6.465	947	6.465	801	6.465	626	6.465	666
6.47	804	6.47	740	6.47	672	6.47	565
6.475	791	6.475	705	6.475	598	6.475	491
6.48	919	6.48	731	6.48	642	6.48	513
6.485	1014	6.485	726	6.485	684	6.485	579
6.49	998	6.49	656	6.49	666	6.49	577
6.495	936	6.495	651	6.495	632	6.495	527
6.5	931	6.5	679	6.5	559	6.5	505
6.505	904	6.505	694	6.505	517	6.505	535
6.51	886	6.51	685	6.51	619	6.51	550
6.515	856	6.515	598	6.515	709	6.515	545
6.52	827	6.52	594	6.52	692	6.52	580
6.525	903	6.525	637	6.525	668	6.525	559
6.53	967	6.53	566	6.53	608	6.53	591
6.535	953	6.535	524	6.535	567	6.535	590
6.54	938	6.54	592	6.54	674	6.54	598
6.545	952	6.545	632	6.545	739	6.545	590
6.55	965	6.55	642	6.55	686	6.55	583
6.555	946	6.555	641	6.555	614	6.555	535
6.56	945	6.56	609	6.56	595	6.56	509
6.565	947	6.565	604	6.565	657	6.565	486
6.57	877	6.57	591	6.57	649	6.57	501
6.575	821	6.575	581	6.575	595	6.575	463
6.58	779	6.58	642	6.58	613	6.58	453
6.585	768	6.585	643	6.585	588	6.585	501
6.59	840	6.59	552	6.59	561	6.59	544
6.595	833	6.595	561	6.595	623	6.595	558
6.6	773	6.6	646	6.6	595	6.6	587
6.605	788	6.605	660	6.605	508	6.605	641
6.61	808	6.61	658	6.61	579	6.61	592
6.615	805	6.615	639	6.615	689	6.615	541
6.62	878	6.62	568	6.62	648	6.62	539
6.625	874	6.625	574	6.625	626	6.625	508
6.63	851	6.63	684	6.63	695	6.63	510
6.635	917	6.635	726	6.635	704	6.635	571
6.64	921	6.64	884	6.64	579	6.64	583
6.645	919	6.645	842	6.645	533	6.645	574
6.65	1001	6.65	694	6.65	608	6.65	538
6.655	959	6.655	634	6.655	641	6.655	481
6.66	789	6.66	616	6.66	584	6.66	515
6.665	801	6.665	678	6.665	555	6.665	525
6.67	901	6.67	678	6.67	617	6.67	525
6.675	885	6.675	644	6.675	632	6.675	598
6.68	875	6.68	714	6.68	651	6.68	563
6.685	843	6.685	804	6.685	682	6.685	514
6.69	800	6.69	845	6.69	612	6.69	543
6.695	827	6.695	768	6.695	589	6.695	549
6.7	895	6.7	760	6.7	656	6.7	586
6.705	901	6.705	789	6.705	679	6.705	639
6.71	1006	6.71	821	6.71	650	6.71	655
6.715	968	6.715	839	6.715	643	6.715	561
6.72	901	6.72	811	6.72	653	6.72	581
6.725	827	6.725	696	6.725	598	6.725	639
6.73	811	6.73	585	6.73	519	6.73	628
6.735	788	6.735	501	6.735	505	6.735	602
6.74	880	6.74	551	6.74	582	6.74	617
6.745	1032	6.745	721	6.745	590	6.745	598
6.75	949	6.75	666	6.75	576	6.75	545
6.755	773	6.755	735	6.755	539	6.755	515
6.76	741	6.76	701	6.76	559	6.76	504
6.765	807	6.765	635	6.765	630	6.765	530
6.77	823	6.77	567	6.77	643	6.77	616
6.775	827	6.775	648	6.775	546	6.775	645
6.78	802	6.78	697	6.78	505	6.78	562
6.785	745	6.785	750	6.785	627	6.785	475
6.79	769	6.79	694	6.79	654	6.79	500
6.795	914	6.795	642	6.795	575	6.795	528
6.8	923	6.8	586	6.8	565	6.8	440
6.805	813	6.805	573	6.805	605	6.805	426
6.81	784	6.81	598	6.81	615	6.81	485
6.815	790	6.815	709	6.815	576	6.815	498
6.82	743	6.82	735	6.82	543	6.82	502
6.825	705	6.825	669	6.825	564	6.825	443
6.83	744	6.83	654	6.83	561	6.83	353
6.835	889	6.835	636	6.835	489	6.835	348
6.84	1042	6.84	647	6.84	450	6.84	489
6.845	1040	6.845	695	6.845	517	6.845	562
6.85	1021	6.85	607	6.85	576	6.85	484
6.855	955	6.855	516	6.855	590	6.855	431
6.86	858	6.86	603	6.86	620	6.86	438
6.865	854	6.865	678	6.865	650	6.865	470
6.87	900	6.87	712	6.87	659	6.87	458
6.875	878	6.875	687	6.875	600	6.875	406
6.88	796	6.88	678	6.88	582	6.88	448
6.885	789	6.885	697	6.885	595	6.885	485
6.89	885	6.89	643	6.89	568	6.89	455
6.895	849	6.895	597	6.895	624	6.895	452
6.9	826	6.9	559	6.9	699	6.9	530
6.905	955	6.905	492	6.905	685	6.905	483
6.91	973	6.91	534	6.91	666	6.91	454
6.915	1000	6.915	666	6.915	621	6.915	515
6.92	1146	6.92	742	6.92	631	6.92	629
6.925	1147	6.925	780	6.925	612	6.925	637
6.93	1187	6.93	953	6.93	569	6.93	581
6.935	1486	6.935	1157	6.935	605	6.935	522
6.94	1825	6.94	1247	6.94	631	6.94	569
6.945	2253	6.945	1417	6.945	593	6.945	609
6.95	2408	6.95	1740	6.95	597	6.95	621
6.955	2114	6.955	1986	6.955	641	6.955	581
6.96	1888	6.96	2077	6.96	634	6.96	622
6.965	2070	6.965	2269	6.965	643	6.965	654
6.97	2407	6.97	2350	6.97	625	6.97	604
6.975	2373	6.975	2162	6.975	607	6.975	515
6.98	2157	6.98	2037	6.98	639	6.98	482
6.985	1979	6.985	1985	6.985	633	6.985	496
6.99	1859	6.99	1787	6.99	649	6.99	517
6.995	1771	6.995	1641	6.995	714	6.995	539
7	1735	7	1647	7	632	7	493
7.005	1621	7.005	1702	7.005	574	7.005	523
7.01	1574	7.01	1646	7.01	591	7.01	541
7.015	1624	7.015	1566	7.015	652	7.015	508
7.02	1581	7.02	1487	7.02	742	7.02	458
7.025	1407	7.025	1502	7.025	663	7.025	465
7.03	1294	7.03	1550	7.03	522	7.03	494
7.035	1310	7.035	1503	7.035	611	7.035	477
7.04	1330	7.04	1431	7.04	800	7.04	494
7.045	1322	7.045	1421	7.045	797	7.045	581
7.05	1404	7.05	1460	7.05	702	7.05	629
7.055	1504	7.055	1429	7.055	675	7.055	551
7.06	1558	7.06	1270	7.06	625	7.06	506
7.065	1582	7.065	1416	7.065	597	7.065	548
7.07	1606	7.07	1469	7.07	630	7.07	555
7.075	1694	7.075	1524	7.075	604	7.075	547
7.08	1789	7.08	1673	7.08	599	7.08	501
7.085	1738	7.085	1860	7.085	621	7.085	461
7.09	1710	7.09	1983	7.09	572	7.09	500
7.095	1848	7.095	1947	7.095	504	7.095	506
7.1	1882	7.1	1661	7.1	485	7.1	489
7.105	1792	7.105	1661	7.105	581	7.105	556
7.11	1712	7.11	1936	7.11	626	7.11	535
7.115	1656	7.115	1904	7.115	533	7.115	439
7.12	1639	7.12	1702	7.12	512	7.12	446
7.125	1665	7.125	1670	7.125	573	7.125	498
7.13	1548	7.13	1567	7.13	623	7.13	570
7.135	1430	7.135	1330	7.135	589	7.135	553
7.14	1356	7.14	1141	7.14	524	7.14	507
7.145	1317	7.145	1177	7.145	526	7.145	538
7.15	1395	7.15	1285	7.15	608	7.15	532
7.155	1442	7.155	1268	7.155	603	7.155	558
7.16	1479	7.16	1242	7.16	554	7.16	555
7.165	1369	7.165	1248	7.165	618	7.165	476
7.17	1412	7.17	1245	7.17	635	7.17	520
7.175	1386	7.175	1282	7.175	616	7.175	591
7.18	1373	7.18	1288	7.18	663	7.18	560
7.185	1446	7.185	1227	7.185	704	7.185	548
7.19	1292	7.19	1123	7.19	640	7.19	610
7.195	1125	7.195	1064	7.195	535	7.195	657
7.2	1060	7.2	1095	7.2	566	7.2	610
7.205	1078	7.205	1065	7.205	645	7.205	521
7.21	1162	7.21	1007	7.21	619	7.21	470
7.215	1202	7.215	954	7.215	593	7.215	432
7.22	1061	7.22	901	7.22	546	7.22	481
7.225	1023	7.225	861	7.225	514	7.225	544
7.23	1096	7.23	848	7.23	540	7.23	524
7.235	1064	7.235	874	7.235	604	7.235	483
7.24	1137	7.24	859	7.24	702	7.24	513
7.245	1211	7.245	756	7.245	738	7.245	532
7.25	1241	7.25	650	7.25	611	7.25	567
7.255	1280	7.255	721	7.255	558	7.255	529
7.26	1249	7.26	839	7.26	657	7.26	449
7.265	1197	7.265	845	7.265	674	7.265	487
7.27	1178	7.27	779	7.27	592	7.27	523
7.275	1247	7.275	839	7.275	563	7.275	500
7.28	1364	7.28	968	7.28	638	7.28	490
7.285	1426	7.285	988	7.285	666	7.285	426
7.29	1357	7.29	945	7.29	600	7.29	443
7.295	1297	7.295	943	7.295	582	7.295	524
7.3	1390	7.3	973	7.3	576	7.3	529
7.305	1534	7.305	1050	7.305	552	7.305	541
7.31	1687	7.31	1097	7.31	528	7.31	587
7.315	1651	7.315	1104	7.315	504	7.315	527
7.32	1424	7.32	1108	7.32	551	7.32	434
7.325	1309	7.325	990	7.325	645	7.325	396
7.33	1343	7.33	848	7.33	679	7.33	423
7.335	1397	7.335	933	7.335	592	7.335	392
7.34	1209	7.34	999	7.34	567	7.34	425
7.345	1123	7.345	907	7.345	633	7.345	434
7.35	1279	7.35	918	7.35	599	7.35	448
7.355	1311	7.355	984	7.355	575	7.355	456
7.36	1339	7.36	995	7.36	603	7.36	439
7.365	1620	7.365	895	7.365	620	7.365	406
7.37	1781	7.37	864	7.37	679	7.37	503
7.375	1931	7.375	864	7.375	779	7.375	539
7.38	2082	7.38	823	7.38	717	7.38	476
7.385	2149	7.385	724	7.385	577	7.385	517
7.39	2073	7.39	700	7.39	505	7.39	657
7.395	1827	7.395	718	7.395	502	7.395	665
7.4	1605	7.4	773	7.4	545	7.4	551
7.405	1506	7.405	825	7.405	509	7.405	514
7.41	1252	7.41	767	7.41	463	7.41	539
7.415	1031	7.415	727	7.415	543	7.415	508
7.42	1011	7.42	709	7.42	665	7.42	390
7.425	1037	7.425	643	7.425	605	7.425	379
7.43	986	7.43	706	7.43	501	7.43	415
7.435	1051	7.435	715	7.435	496	7.435	455
7.44	1125	7.44	751	7.44	539	7.44	499
7.445	1202	7.445	744	7.445	499	7.445	487
7.45	1088	7.45	810	7.45	558	7.45	456
7.455	1044	7.455	688	7.455	639	7.455	432
7.46	1082	7.46	680	7.46	654	7.46	438
7.465	1166	7.465	779	7.465	675	7.465	458
7.47	1247	7.47	759	7.47	703	7.47	572
7.475	1207	7.475	696	7.475	678	7.475	615
7.48	1095	7.48	694	7.48	610	7.48	521
7.485	1126	7.485	772	7.485	606	7.485	491
7.49	1245	7.49	823	7.49	597	7.49	489
7.495	1237	7.495	860	7.495	572	7.495	421
7.5	1166	7.5	883	7.5	604	7.5	446
7.505	1216	7.505	902	7.505	557	7.505	457
7.51	1347	7.51	904	7.51	543	7.51	406
7.515	1401	7.515	960	7.515	610	7.515	403
7.52	1359	7.52	900	7.52	611	7.52	453
7.525	1280	7.525	823	7.525	574	7.525	414
7.53	1224	7.53	882	7.53	599	7.53	381
7.535	1190	7.535	918	7.535	638	7.535	489
7.54	1245	7.54	973	7.54	658	7.54	605
7.545	1320	7.545	1032	7.545	677	7.545	600
7.55	1218	7.55	1033	7.55	699	7.55	524
7.555	1260	7.555	948	7.555	701	7.555	508
7.56	1256	7.56	839	7.56	667	7.56	576
7.565	1188	7.565	816	7.565	655	7.565	625
7.57	1334	7.57	929	7.57	655	7.57	588
7.575	1455	7.575	922	7.575	584	7.575	460
7.58	1377	7.58	719	7.58	546	7.58	387
7.585	1394	7.585	699	7.585	565	7.585	430
7.59	1273	7.59	866	7.59	593	7.59	506
7.595	1232	7.595	913	7.595	566	7.595	515
7.6	1370	7.6	887	7.6	570	7.6	507
7.605	1934	7.605	884	7.605	612	7.605	586
7.61	3241	7.61	859	7.61	611	7.61	783
7.615	6062	7.615	1200	7.615	717	7.615	1195
7.62	12380	7.62	2028	7.62	1117	7.62	1971
7.625	23253	7.625	3559	7.625	1719	7.625	3490
7.63	36847	7.63	6156	7.63	2634	7.63	6173
7.635	51524	7.635	9549	7.635	4270	7.635	10171
7.64	66871	7.64	13429	7.64	6112	7.64	15071
7.645	78814	7.645	17313	7.645	7496	7.645	19370
7.65	82728	7.65	19753	7.65	8488	7.65	22111
7.655	79084	7.655	20003	7.655	8764	7.655	23257
7.66	72144	7.66	19142	7.66	8450	7.66	22507
7.665	65862	7.665	17842	7.665	8164	7.665	20433
7.67	59351	7.67	15655	7.67	7612	7.67	18184
7.675	52241	7.675	13503	7.675	6579	7.675	16229
7.68	45796	7.68	12077	7.68	5581	7.68	14040
7.685	39861	7.685	11242	7.685	4999	7.685	11914
7.69	34558	7.69	10627	7.69	4625	7.69	10355
7.695	29870	7.695	9408	7.695	4132	7.695	9087
7.7	25999	7.7	8069	7.7	3666	7.7	8229
7.705	22914	7.705	6972	7.705	3262	7.705	7530
7.71	20326	7.71	6021	7.71	3005	7.71	6668
7.715	17978	7.715	5366	7.715	2835	7.715	6013
7.72	15666	7.72	4754	7.72	2452	7.72	5308
7.725	12945	7.725	4056	7.725	2072	7.725	4358
7.73	9510	7.73	3281	7.73	1898	7.73	3438
7.735	6425	7.735	2547	7.735	1449	7.735	2429
7.74	4194	7.74	2003	7.74	1081	7.74	1429
7.745	2571	7.745	1525	7.745	846	7.745	881
7.75	1883	7.75	1161	7.75	645	7.75	694
7.755	1795	7.755	1008	7.755	621	7.755	635
7.76	1771	7.76	1080	7.76	642	7.76	695
7.765	1716	7.765	1121	7.765	645	7.765	735
7.77	1742	7.77	1073	7.77	717	7.77	714
7.775	1741	7.775	1065	7.775	719	7.775	749
7.78	1714	7.78	1046	7.78	668	7.78	733
7.785	1696	7.785	1001	7.785	637	7.785	631
7.79	1706	7.79	961	7.79	566	7.79	539
7.795	1745	7.795	943	7.795	572	7.795	536
7.8	1782	7.8	970	7.8	577	7.8	638
7.805	1990	7.805	1035	7.805	611	7.805	755
7.81	2314	7.81	1043	7.81	712	7.81	826
7.815	2565	7.815	1052	7.815	903	7.815	908
7.82	2698	7.82	1136	7.82	1095	7.82	1094
7.825	2785	7.825	1269	7.825	1056	7.825	1199
7.83	2870	7.83	1359	7.83	1032	7.83	1135
7.835	2860	7.835	1335	7.835	1095	7.835	1138
7.84	2740	7.84	1309	7.84	1061	7.84	1137
7.845	2668	7.845	1294	7.845	956	7.845	1065
7.85	2753	7.85	1199	7.85	881	7.85	939
7.855	2727	7.855	1074	7.855	788	7.855	842
7.86	2680	7.86	1109	7.86	788	7.86	920
7.865	2640	7.865	1056	7.865	914	7.865	978
7.87	2509	7.87	1163	7.87	987	7.87	857
7.875	2489	7.875	1444	7.875	1054	7.875	822
7.88	2367	7.88	1480	7.88	1064	7.88	870
7.885	2002	7.885	1404	7.885	1005	7.885	822
7.89	1851	7.89	1453	7.89	896	7.89	856
7.895	1875	7.895	1332	7.895	812	7.895	965
7.9	1817	7.9	1180	7.9	967	7.9	848
7.905	1765	7.905	1227	7.905	1090	7.905	748
7.91	1772	7.91	1154	7.91	1008	7.91	818
7.915	1942	7.915	1118	7.915	908	7.915	789
7.92	2143	7.92	1387	7.92	898	7.92	785
7.925	2238	7.925	1566	7.925	855	7.925	848
7.93	2535	7.93	1562	7.93	839	7.93	943
7.935	2872	7.935	1600	7.935	896	7.935	1072
7.94	3124	7.94	1702	7.94	987	7.94	1170
7.945	3255	7.945	1939	7.945	1087	7.945	1230
7.95	3322	7.95	2126	7.95	1163	7.95	1198
7.955	3325	7.955	2149	7.955	1256	7.955	1233
7.96	3254	7.96	2235	7.96	1197	7.96	1300
7.965	3232	7.965	2321	7.965	1030	7.965	1316
7.97	3010	7.97	2245	7.97	914	7.97	1196
7.975	2612	7.975	2039	7.975	815	7.975	1052
7.98	2429	7.98	1844	7.98	912	7.98	971
7.985	2386	7.985	1885	7.985	971	7.985	908
7.99	2304	7.99	1905	7.99	890	7.99	889
7.995	2123	7.995	1607	7.995	812	7.995	837
8	1987	8	1457	8	839	8	787
8.005	2116	8.005	1395	8.005	874	8.005	787
8.01	2285	8.01	1438	8.01	812	8.01	748
8.015	2269	8.015	1504	8.015	756	8.015	667
8.02	2256	8.02	1384	8.02	765	8.02	633
8.025	2043	8.025	1357	8.025	813	8.025	660
8.03	1930	8.03	1359	8.03	824	8.03	672
8.035	1855	8.035	1418	8.035	753	8.035	592
8.04	1741	8.04	1567	8.04	686	8.04	577
8.045	1570	8.045	1496	8.045	646	8.045	675
8.05	1492	8.05	1321	8.05	625	8.05	671
8.055	1476	8.055	1258	8.055	648	8.055	657
8.06	1434	8.06	1252	8.06	697	8.06	702
8.065	1495	8.065	1153	8.065	670	8.065	714
8.07	1591	8.07	1083	8.07	629	8.07	714
8.075	1715	8.075	1225	8.075	769	8.075	725
8.08	1797	8.08	1459	8.08	898	8.08	714
8.085	1885	8.085	1531	8.085	855	8.085	726
8.09	1917	8.09	1359	8.09	835	8.09	750
8.095	1867	8.095	1348	8.095	866	8.095	832
8.1	1769	8.1	1396	8.1	835	8.1	758
8.105	1708	8.105	1499	8.105	803	8.105	673
8.11	1813	8.11	1551	8.11	784	8.11	633
8.115	1910	8.115	1372	8.115	778	8.115	664
8.12	1840	8.12	1316	8.12	822	8.12	717
8.125	1698	8.125	1302	8.125	888	8.125	723
8.13	1579	8.13	1349	8.13	889	8.13	742
8.135	1564	8.135	1406	8.135	852	8.135	724
8.14	1407	8.14	1270	8.14	913	8.14	682
8.145	1229	8.145	1145	8.145	998	8.145	747
8.15	1252	8.15	1058	8.15	966	8.15	831
8.155	1415	8.155	1042	8.155	848	8.155	777
8.16	1387	8.16	1077	8.16	887	8.16	699
8.165	1299	8.165	1093	8.165	997	8.165	728
8.17	1337	8.17	1032	8.17	937	8.17	791
8.175	1449	8.175	1072	8.175	915	8.175	820
8.18	1524	8.18	1095	8.18	898	8.18	755
8.185	1616	8.185	1311	8.185	828	8.185	770
8.19	1579	8.19	1370	8.19	887	8.19	822
8.195	1656	8.195	1395	8.195	959	8.195	815
8.2	1702	8.2	1284	8.2	954	8.2	803
8.205	1785	8.205	1199	8.205	886	8.205	678
8.21	1836	8.21	1317	8.21	906	8.21	654
8.215	1769	8.215	1423	8.215	925	8.215	848
8.22	1661	8.22	1579	8.22	906	8.22	1000
8.225	1835	8.225	1771	8.225	926	8.225	1116
8.23	1916	8.23	1715	8.23	941	8.23	1202
8.235	1904	8.235	1732	8.235	979	8.235	1173
8.24	1905	8.24	1569	8.24	1019	8.24	1160
8.245	1739	8.245	1451	8.245	1107	8.245	1227
8.25	1605	8.25	1453	8.25	1125	8.25	1234
8.255	1506	8.255	1520	8.255	1080	8.255	1232
8.26	1444	8.26	1567	8.26	1208	8.26	1301
8.265	1382	8.265	1592	8.265	1375	8.265	1298
8.27	1457	8.27	1607	8.27	1323	8.27	1167
8.275	1540	8.275	1461	8.275	1258	8.275	1055
8.28	1429	8.28	1435	8.28	1306	8.28	1053
8.285	1453	8.285	1491	8.285	1280	8.285	1081
8.29	1445	8.29	1500	8.29	1402	8.29	1019
8.295	1329	8.295	1552	8.295	1420	8.295	937
8.3	1412	8.3	1543	8.3	1372	8.3	938
8.305	1604	8.305	1473	8.305	1255	8.305	965
8.31	1721	8.31	1423	8.31	1138	8.31	981
8.315	1781	8.315	1444	8.315	1069	8.315	1023
8.32	1965	8.32	1558	8.32	1110	8.32	1045
8.325	2000	8.325	1695	8.325	1309	8.325	1087
8.33	1909	8.33	1762	8.33	1384	8.33	1128
8.335	1806	8.335	1738	8.335	1312	8.335	1177
8.34	1691	8.34	1628	8.34	1328	8.34	1146
8.345	1677	8.345	1519	8.345	1454	8.345	1100
8.35	1932	8.35	1586	8.35	1506	8.35	1066
8.355	1942	8.355	1618	8.355	1486	8.355	988
8.36	1764	8.36	1585	8.36	1540	8.36	1044
8.365	1751	8.365	1564	8.365	1455	8.365	1110
8.37	1729	8.37	1423	8.37	1222	8.37	1048
8.375	1717	8.375	1316	8.375	1210	8.375	1153
8.38	1816	8.38	1399	8.38	1284	8.38	1316
8.385	1818	8.385	1448	8.385	1249	8.385	1269
8.39	1704	8.39	1481	8.39	1353	8.39	1206
8.395	1632	8.395	1492	8.395	1411	8.395	1287
8.4	1631	8.4	1443	8.4	1344	8.4	1290
8.405	1565	8.405	1478	8.405	1409	8.405	1163
8.41	1552	8.41	1481	8.41	1503	8.41	1067
8.415	1485	8.415	1427	8.415	1323	8.415	1148
8.42	1446	8.42	1532	8.42	1184	8.42	1223
8.425	1544	8.425	1590	8.425	1294	8.425	1190
8.43	1538	8.43	1526	8.43	1417	8.43	1232
8.435	1453	8.435	1497	8.435	1360	8.435	1119
8.44	1566	8.44	1500	8.44	1265	8.44	1127
8.445	1567	8.445	1640	8.445	1257	8.445	1280
8.45	1472	8.45	1819	8.45	1378	8.45	1368
8.455	1500	8.455	1826	8.455	1553	8.455	1411
8.46	1484	8.46	1725	8.46	1511	8.46	1293
8.465	1388	8.465	1598	8.465	1423	8.465	1162
8.47	1528	8.47	1481	8.47	1371	8.47	1176
8.475	1643	8.475	1427	8.475	1320	8.475	1152
8.48	1551	8.48	1365	8.48	1113	8.48	1033
8.485	1493	8.485	1236	8.485	1010	8.485	901
8.49	1534	8.49	1236	8.49	913	8.49	769
8.495	1527	8.495	1318	8.495	822	8.495	855
8.5	1624	8.5	1451	8.5	876	8.5	899
8.505	1598	8.505	1356	8.505	983	8.505	847
8.51	1514	8.51	1279	8.51	1004	8.51	882
8.515	1372	8.515	1238	8.515	1056	8.515	880
8.52	1416	8.52	1210	8.52	1111	8.52	850
8.525	1407	8.525	1259	8.525	1100	8.525	900
8.53	1524	8.53	1259	8.53	1060	8.53	890
8.535	1541	8.535	1186	8.535	954	8.535	790
8.54	1541	8.54	1090	8.54	935	8.54	770
8.545	1636	8.545	1093	8.545	1052	8.545	818
8.55	1985	8.55	1194	8.55	1092	8.55	795
8.555	2118	8.555	1219	8.555	1087	8.555	781
8.56	2047	8.56	1290	8.56	1173	8.56	814
8.565	2271	8.565	1502	8.565	1165	8.565	747
8.57	3114	8.57	2195	8.57	1036	8.57	856
8.575	4555	8.575	3894	8.575	1087	8.575	835
8.58	6081	8.58	6725	8.58	1219	8.58	830
8.585	7443	8.585	9557	8.585	1190	8.585	945
8.59	8460	8.59	11458	8.59	1321	8.59	1045
8.595	8447	8.595	12314	8.595	1319	8.595	1115
8.6	7702	8.6	12007	8.6	1267	8.6	1216
8.605	6690	8.605	10720	8.605	1117	8.605	1119
8.61	5830	8.61	9094	8.61	1012	8.61	956
8.615	5308	8.615	7766	8.615	993	8.615	925
8.62	4663	8.62	6832	8.62	1142	8.62	965
8.625	4035	8.625	5872	8.625	1304	8.625	1107
8.63	3403	8.63	4720	8.63	1280	8.63	1031
8.635	2713	8.635	3610	8.635	1133	8.635	997
8.64	2296	8.64	2653	8.64	1117	8.64	1088
8.645	2123	8.645	1963	8.645	1181	8.645	1039
8.65	2037	8.65	1866	8.65	1176	8.65	969
8.655	1989	8.655	2082	8.655	1216	8.655	977
8.66	1796	8.66	2086	8.66	1180	8.66	924
8.665	1635	8.665	1829	8.665	1069	8.665	840
8.67	1544	8.67	1589	8.67	911	8.67	878
8.675	1415	8.675	1489	8.675	918	8.675	919
8.68	1353	8.68	1379	8.68	937	8.68	832
8.685	1456	8.685	1360	8.685	948	8.685	799
8.69	1428	8.69	1308	8.69	869	8.69	730
8.695	1407	8.695	1099	8.695	787	8.695	581
8.7	1387	8.7	1009	8.7	813	8.7	557
8.705	1504	8.705	1147	8.705	915	8.705	671
8.71	1773	8.71	1415	8.71	809	8.71	778
8.715	2009	8.715	1582	8.715	739	8.715	728
8.72	2231	8.72	2000	8.72	726	8.72	644
8.725	2431	8.725	2411	8.725	732	8.725	631
8.73	2470	8.73	2661	8.73	704	8.73	625
8.735	2483	8.735	2700	8.735	639	8.735	623
8.74	2430	8.74	2501	8.74	608	8.74	676
8.745	2368	8.745	2182	8.745	680	8.745	763
8.75	2091	8.75	1976	8.75	744	8.75	760
8.755	1791	8.755	1742	8.755	709	8.755	718
8.76	1649	8.76	1536	8.76	721	8.76	702
8.765	1588	8.765	1486	8.765	801	8.765	574
8.77	1623	8.77	1399	8.77	880	8.77	546
8.775	1781	8.775	1359	8.775	805	8.775	589
8.78	1795	8.78	1469	8.78	815	8.78	607
8.785	1697	8.785	1523	8.785	810	8.785	591
8.79	1674	8.79	1521	8.79	784	8.79	669
8.795	1683	8.795	1517	8.795	832	8.795	687
8.8	1639	8.8	1456	8.8	877	8.8	628
8.805	1683	8.805	1432	8.805	841	8.805	656
8.81	1531	8.81	1307	8.81	758	8.81	724
8.815	1306	8.815	1188	8.815	714	8.815	755
8.82	1292	8.82	1173	8.82	762	8.82	734
8.825	1340	8.825	1196	8.825	754	8.825	667
8.83	1199	8.83	1109	8.83	737	8.83	560
8.835	1097	8.835	1104	8.835	780	8.835	617
8.84	1188	8.84	1227	8.84	782	8.84	739
8.845	1416	8.845	1286	8.845	821	8.845	752
8.85	1550	8.85	1237	8.85	888	8.85	770
8.855	1440	8.855	1256	8.855	879	8.855	857
8.86	1318	8.86	1363	8.86	924	8.86	854
8.865	1320	8.865	1285	8.865	844	8.865	822
8.87	1232	8.87	1139	8.87	860	8.87	837
8.875	1148	8.875	1055	8.875	949	8.875	829
8.88	1156	8.88	1018	8.88	861	8.88	724
8.885	1215	8.885	990	8.885	729	8.885	649
8.89	1272	8.89	966	8.89	804	8.89	672
8.895	1308	8.895	981	8.895	860	8.895	644
8.9	1316	8.9	966	8.9	904	8.9	543
8.905	1413	8.905	1004	8.905	929	8.905	562
8.91	1477	8.91	1130	8.91	885	8.91	682
8.915	1388	8.915	1179	8.915	905	8.915	742
8.92	1120	8.92	1160	8.92	912	8.92	679
8.925	1042	8.925	1163	8.925	871	8.925	560
8.93	1161	8.93	1118	8.93	822	8.93	498
8.935	1145	8.935	1043	8.935	826	8.935	530
8.94	1145	8.94	1119	8.94	862	8.94	519
8.945	1264	8.945	1220	8.945	798	8.945	507
8.95	1404	8.95	1337	8.95	741	8.95	630
8.955	1831	8.955	1371	8.955	819	8.955	702
8.96	2137	8.96	1498	8.96	835	8.96	700
8.965	1919	8.965	1632	8.965	759	8.965	702
8.97	1737	8.97	1610	8.97	889	8.97	597
8.975	1606	8.975	1606	8.975	904	8.975	468
8.98	1513	8.98	1557	8.98	794	8.98	495
8.985	1412	8.985	1379	8.985	692	8.985	557
8.99	1271	8.99	1215	8.99	656	8.99	599
8.995	1215	8.995	1167	8.995	775	8.995	595
9	1185	9	1015	9	834	9	613
9.005	1190	9.005	921	9.005	775	9.005	776
9.01	1248	9.01	962	9.01	738	9.01	920
9.015	1140	9.015	978	9.015	695	9.015	856
9.02	1016	9.02	1004	9.02	653	9.02	709
9.025	1057	9.025	1011	9.025	592	9.025	606
9.03	1149	9.03	1025	9.03	666	9.03	589
9.035	1223	9.035	1140	9.035	652	9.035	571
9.04	1339	9.04	1208	9.04	813	9.04	625
9.045	1540	9.045	1244	9.045	931	9.045	551
9.05	1846	9.05	1476	9.05	1007	9.05	521
9.055	2235	9.055	1776	9.055	911	9.055	536
9.06	2322	9.06	2028	9.06	805	9.06	592
9.065	2064	9.065	2090	9.065	771	9.065	643
9.07	1985	9.07	1929	9.07	686	9.07	698
9.075	2062	9.075	1826	9.075	624	9.075	837
9.08	2098	9.08	1736	9.08	720	9.08	861
9.085	2113	9.085	1683	9.085	819	9.085	760
9.09	2042	9.09	1700	9.09	885	9.09	751
9.095	1806	9.095	1492	9.095	904	9.095	629
9.1	1589	9.1	1348	9.1	868	9.1	740
9.105	1470	9.105	1344	9.105	898	9.105	778
9.11	1495	9.11	1205	9.11	819	9.11	789
9.115	1448	9.115	1043	9.115	730	9.115	779
9.12	1398	9.12	965	9.12	780	9.12	728
9.125	1352	9.125	982	9.125	917	9.125	686
9.13	1350	9.13	995	9.13	986	9.13	773
9.135	1390	9.135	1024	9.135	899	9.135	915
9.14	1385	9.14	1147	9.14	834	9.14	845
9.145	1260	9.145	1149	9.145	855	9.145	587
9.15	1125	9.15	1013	9.15	785	9.15	497
9.155	1268	9.155	910	9.155	698	9.155	562
9.16	1453	9.16	965	9.16	754	9.16	574
9.165	1309	9.165	1018	9.165	645	9.165	540
9.17	1313	9.17	1082	9.17	673	9.17	546
9.175	1467	9.175	1129	9.175	750	9.175	614
9.18	1559	9.18	1252	9.18	675	9.18	607
9.185	1636	9.185	1397	9.185	668	9.185	552
9.19	1662	9.19	1406	9.19	724	9.19	512
9.195	1683	9.195	1588	9.195	767	9.195	579
9.2	1610	9.2	1778	9.2	744	9.2	678
9.205	1643	9.205	1652	9.205	656	9.205	736
9.21	1588	9.21	1474	9.21	679	9.21	590
9.215	1506	9.215	1331	9.215	821	9.215	553
9.22	1474	9.22	1259	9.22	873	9.22	644
9.225	1398	9.225	1221	9.225	757	9.225	660
9.23	1260	9.23	1119	9.23	707	9.23	649
9.235	1308	9.235	1107	9.235	768	9.235	606
9.24	1371	9.24	1128	9.24	772	9.24	577
9.245	1268	9.245	1120	9.245	767	9.245	567
9.25	1206	9.25	1167	9.25	747	9.25	640
9.255	1368	9.255	1179	9.255	700	9.255	638
9.26	1420	9.26	1230	9.26	733	9.26	595
9.265	1396	9.265	1246	9.265	778	9.265	522
9.27	1381	9.27	1113	9.27	731	9.27	541
9.275	1353	9.275	1095	9.275	712	9.275	474
9.28	1290	9.28	1162	9.28	744	9.28	467
9.285	1141	9.285	1100	9.285	714	9.285	571
9.29	1015	9.29	1069	9.29	681	9.29	588
9.295	1165	9.295	1122	9.295	747	9.295	540
9.3	1275	9.3	1160	9.3	876	9.3	553
9.305	1279	9.305	1094	9.305	872	9.305	611
9.31	1259	9.31	957	9.31	831	9.31	625
9.315	1381	9.315	977	9.315	810	9.315	640
9.32	1665	9.32	1106	9.32	752	9.32	702
9.325	1595	9.325	1188	9.325	747	9.325	733
9.33	1303	9.33	1050	9.33	816	9.33	728
9.335	1291	9.335	889	9.335	806	9.335	706
9.34	1370	9.34	949	9.34	784	9.34	597
9.345	1360	9.345	1063	9.345	840	9.345	607
9.35	1297	9.35	1097	9.35	885	9.35	614
9.355	1384	9.355	1290	9.355	865	9.355	642
9.36	1364	9.36	1329	9.36	806	9.36	697
9.365	1403	9.365	1341	9.365	800	9.365	652
9.37	1688	9.37	1443	9.37	922	9.37	623
9.375	2008	9.375	1461	9.375	996	9.375	688
9.38	2157	9.38	1426	9.38	973	9.38	797
9.385	2173	9.385	1494	9.385	971	9.385	898
9.39	1900	9.39	1526	9.39	1091	9.39	837
9.395	1603	9.395	1529	9.395	1042	9.395	867
9.4	1544	9.4	1384	9.4	760	9.4	840
9.405	1351	9.405	1150	9.405	779	9.405	779
9.41	1299	9.41	1127	9.41	862	9.41	679
9.415	1258	9.415	1142	9.415	974	9.415	746
9.42	1212	9.42	1164	9.42	952	9.42	700
9.425	1295	9.425	1124	9.425	757	9.425	676
9.43	1376	9.43	977	9.43	661	9.43	684
9.435	1405	9.435	983	9.435	811	9.435	682
9.44	1527	9.44	1081	9.44	903	9.44	602
9.445	1544	9.445	1181	9.445	793	9.445	565
9.45	1483	9.45	1299	9.45	802	9.45	526
9.455	1434	9.455	1120	9.455	820	9.455	576
9.46	1445	9.46	1099	9.46	862	9.46	670
9.465	1501	9.465	1190	9.465	823	9.465	701
9.47	1527	9.47	1134	9.47	748	9.47	714
9.475	1444	9.475	1058	9.475	710	9.475	683
9.48	1389	9.48	943	9.48	787	9.48	591
9.485	1279	9.485	913	9.485	953	9.485	578
9.49	1189	9.49	1021	9.49	1061	9.49	624
9.495	1221	9.495	1158	9.495	1073	9.495	722
9.5	1306	9.5	1241	9.5	1020	9.5	731
9.505	1369	9.505	1193	9.505	852	9.505	587
9.51	1354	9.51	1025	9.51	779	9.51	549
9.515	1373	9.515	985	9.515	832	9.515	591
9.52	1501	9.52	1088	9.52	936	9.52	560
9.525	1584	9.525	1193	9.525	1012	9.525	549
9.53	1602	9.53	1360	9.53	995	9.53	571
9.535	1548	9.535	1358	9.535	893	9.535	691
9.54	1558	9.54	1344	9.54	947	9.54	851
9.545	1568	9.545	1333	9.545	1009	9.545	739
9.55	1456	9.55	1343	9.55	896	9.55	640
9.555	1391	9.555	1267	9.555	872	9.555	664
9.56	1529	9.56	1356	9.56	894	9.56	662
9.565	1699	9.565	1459	9.565	871	9.565	786
9.57	1781	9.57	1575	9.57	955	9.57	953
9.575	2012	9.575	1765	9.575	1078	9.575	951
9.58	2308	9.58	1777	9.58	1069	9.58	834
9.585	2287	9.585	1804	9.585	1007	9.585	743
9.59	2061	9.59	1874	9.59	998	9.59	799
9.595	1950	9.595	1707	9.595	955	9.595	950
9.6	1958	9.6	1497	9.6	926	9.6	910
9.605	1930	9.605	1414	9.605	1067	9.605	738
9.61	1887	9.61	1380	9.61	1056	9.61	682
9.615	1806	9.615	1504	9.615	940	9.615	680
9.62	1694	9.62	1515	9.62	842	9.62	708
9.625	1486	9.625	1463	9.625	875	9.625	744
9.63	1386	9.63	1444	9.63	879	9.63	758
9.635	1435	9.635	1456	9.635	915	9.635	777
9.64	1358	9.64	1454	9.64	949	9.64	746
9.645	1451	9.645	1433	9.645	953	9.645	686
9.65	1680	9.65	1399	9.65	1054	9.65	708
9.655	1684	9.655	1392	9.655	1162	9.655	805
9.66	1557	9.66	1500	9.66	1122	9.66	810
9.665	1591	9.665	1560	9.665	964	9.665	749
9.67	1541	9.67	1294	9.67	1000	9.67	780
9.675	1339	9.675	1211	9.675	976	9.675	841
9.68	1284	9.68	1318	9.68	1023	9.68	808
9.685	1505	9.685	1310	9.685	1100	9.685	757
9.69	1615	9.69	1289	9.69	1235	9.69	840
9.695	1768	9.695	1394	9.695	1308	9.695	866
9.7	2091	9.7	1542	9.7	1237	9.7	872
9.705	2091	9.705	1613	9.705	1265	9.705	859
9.71	1957	9.71	1737	9.71	1311	9.71	1067
9.715	2040	9.715	1733	9.715	1303	9.715	981
9.72	1856	9.72	1687	9.72	1352	9.72	1039
9.725	1786	9.725	1650	9.725	1334	9.725	1078
9.73	1699	9.73	1455	9.73	1187	9.73	976
9.735	1539	9.735	1376	9.735	1085	9.735	770
9.74	1454	9.74	1522	9.74	1066	9.74	717
9.745	1538	9.745	1486	9.745	991	9.745	870
9.75	1651	9.75	1376	9.75	992	9.75	892
9.755	1589	9.755	1328	9.755	1184	9.755	810
9.76	1562	9.76	1337	9.76	1174	9.76	940
9.765	1611	9.765	1356	9.765	1034	9.765	1051
9.77	1584	9.77	1341	9.77	1088	9.77	1004
9.775	1551	9.775	1345	9.775	1106	9.775	804
9.78	1702	9.78	1447	9.78	954	9.78	723
9.785	1715	9.785	1483	9.785	932	9.785	753
9.79	1508	9.79	1567	9.79	1079	9.79	852
9.795	1512	9.795	1667	9.795	1206	9.795	823
9.8	1657	9.8	1563	9.8	1124	9.8	755
9.805	1901	9.805	1589	9.805	1029	9.805	830
9.81	1960	9.81	1700	9.81	1031	9.81	749
9.815	2072	9.815	1587	9.815	1056	9.815	730
9.82	2228	9.82	1520	9.82	1127	9.82	775
9.825	2472	9.825	1609	9.825	1033	9.825	736
9.83	2409	9.83	1544	9.83	938	9.83	665
9.835	2197	9.835	1426	9.835	976	9.835	678
9.84	1801	9.84	1353	9.84	1043	9.84	729
9.845	1535	9.845	1334	9.845	1131	9.845	695
9.85	1656	9.85	1349	9.85	1169	9.85	623
9.855	1754	9.855	1410	9.855	1160	9.855	674
9.86	1823	9.86	1585	9.86	1111	9.86	707
9.865	1718	9.865	1735	9.865	1184	9.865	749
9.87	1546	9.87	1771	9.87	1314	9.87	856
9.875	1600	9.875	1827	9.875	1365	9.875	883
9.88	1744	9.88	1797	9.88	1409	9.88	939
9.885	1743	9.885	1792	9.885	1373	9.885	1024
9.89	1706	9.89	1965	9.89	1366	9.89	1067
9.895	1812	9.895	1971	9.895	1484	9.895	1135
9.9	1911	9.9	1956	9.9	1381	9.9	1220
9.905	1811	9.905	1901	9.905	1327	9.905	1231
9.91	1663	9.91	1849	9.91	1501	9.91	1152
9.915	1756	9.915	1717	9.915	1494	9.915	1113
9.92	1895	9.92	1731	9.92	1502	9.92	1161
9.925	1793	9.925	1906	9.925	1625	9.925	1183
9.93	1760	9.93	1952	9.93	1474	9.93	1176
9.935	2031	9.935	1941	9.935	1477	9.935	1135
9.94	2079	9.94	2093	9.94	1432	9.94	1234
9.945	1950	9.945	2090	9.945	1424	9.945	1461
9.95	1865	9.95	1930	9.95	1497	9.95	1586
9.955	1934	9.955	2081	9.955	1552	9.955	1555
9.96	2301	9.96	2323	9.96	1569	9.96	1633
9.965	3015	9.965	2733	9.965	1825	9.965	2127
9.97	4012	9.97	3619	9.97	2548	9.97	3431
9.975	5357	9.975	4518	9.975	3402	9.975	5174
9.98	7045	9.98	5660	9.98	4366	9.98	6518
9.985	8135	9.985	6528	9.985	4973	9.985	7287
9.99	7996	9.99	6624	9.99	4968	9.99	7340
9.995	6943	9.995	6299	9.995	4532	9.995	6609
10	5852	10	5626	10	3794	10	5299
10.005	4953	10.005	4584	10.005	2938	10.005	3951
10.01	4103	10.01	3590	10.01	2230	10.01	2808
10.015	3274	10.015	2995	10.015	1849	10.015	1875
10.02	2480	10.02	2689	10.02	1684	10.02	1450
10.025	2169	10.025	2313	10.025	1494	10.025	1263
10.03	2492	10.03	2141	10.03	1343	10.03	1130
10.035	2502	10.035	2146	10.035	1339	10.035	1100
10.04	2158	10.04	2258	10.04	1362	10.04	1127
10.045	1970	10.045	2192	10.045	1414	10.045	1139
10.05	2031	10.05	1901	10.05	1425	10.05	1171
10.055	2133	10.055	1633	10.055	1192	10.055	1159
10.06	2183	10.06	1869	10.06	1180	10.06	1046
10.065	2147	10.065	2192	10.065	1210	10.065	1044
10.07	2023	10.07	2076	10.07	1176	10.07	1088
10.075	1880	10.075	1863	10.075	1242	10.075	1007
10.08	1840	10.08	1823	10.08	1290	10.08	935
10.085	1962	10.085	1813	10.085	1263	10.085	955
10.09	1919	10.09	1819	10.09	1148	10.09	903
10.095	1806	10.095	1816	10.095	1152	10.095	845
10.1	1796	10.1	1789	10.1	1196	10.1	860
10.105	1835	10.105	1722	10.105	1160	10.105	861
10.11	1827	10.11	1666	10.11	1195	10.11	824
10.115	1869	10.115	1761	10.115	1187	10.115	838
10.12	1905	10.12	1888	10.12	1274	10.12	905
10.125	1946	10.125	1860	10.125	1125	10.125	951
10.13	1898	10.13	1838	10.13	1051	10.13	981
10.135	1853	10.135	1896	10.135	1098	10.135	941
10.14	1902	10.14	1957	10.14	1273	10.14	881
10.145	1942	10.145	1829	10.145	1283	10.145	806
10.15	1869	10.15	1845	10.15	1215	10.15	755
10.155	1806	10.155	1883	10.155	1129	10.155	772
10.16	1911	10.16	2122	10.16	1177	10.16	794
10.165	2232	10.165	2359	10.165	1160	10.165	840
10.17	2667	10.17	2341	10.17	1104	10.17	867
10.175	2780	10.175	2354	10.175	1176	10.175	913
10.18	2591	10.18	2437	10.18	1397	10.18	1069
10.185	2386	10.185	2471	10.185	1537	10.185	1146
10.19	2267	10.19	2382	10.19	1308	10.19	1054
10.195	2281	10.195	2352	10.195	1129	10.195	929
10.2	2289	10.2	2175	10.2	1152	10.2	839
10.205	2104	10.205	2050	10.205	1294	10.205	786
10.21	2020	10.21	2081	10.21	1246	10.21	799
10.215	2166	10.215	2075	10.215	1295	10.215	847
10.22	2210	10.22	1983	10.22	1300	10.22	943
10.225	2065	10.225	1928	10.225	1224	10.225	977
10.23	1916	10.23	1907	10.23	1176	10.23	1024
10.235	1758	10.235	1874	10.235	1152	10.235	908
10.24	1608	10.24	1934	10.24	1126	10.24	827
10.245	1640	10.245	2093	10.245	1135	10.245	877
10.25	1798	10.25	2009	10.25	1204	10.25	904
10.255	1827	10.255	1822	10.255	1347	10.255	936
10.26	1835	10.26	1764	10.26	1212	10.26	970
10.265	1984	10.265	1794	10.265	1078	10.265	891
10.27	2044	10.27	1957	10.27	1143	10.27	802
10.275	1893	10.275	2128	10.275	1229	10.275	869
10.28	1829	10.28	2142	10.28	1421	10.28	886
10.285	2163	10.285	2224	10.285	1453	10.285	823
10.29	2336	10.29	2464	10.29	1291	10.29	829
10.295	2412	10.295	2656	10.295	1208	10.295	767
10.3	2395	10.3	2726	10.3	1186	10.3	706
10.305	2350	10.305	2738	10.305	1191	10.305	677
10.31	2253	10.31	2679	10.31	1191	10.31	675
10.315	2136	10.315	2510	10.315	1203	10.315	720
10.32	2018	10.32	2222	10.32	1229	10.32	731
10.325	2011	10.325	2010	10.325	1176	10.325	746
10.33	2232	10.33	2068	10.33	1152	10.33	808
10.335	2372	10.335	2228	10.335	1213	10.335	777
10.34	2223	10.34	2227	10.34	1180	10.34	725
10.345	2007	10.345	2054	10.345	1238	10.345	793
10.35	1867	10.35	1868	10.35	1320	10.35	824
10.355	1931	10.355	1861	10.355	1315	10.355	850
10.36	2077	10.36	2030	10.36	1267	10.36	854
10.365	2061	10.365	2067	10.365	1246	10.365	755
10.37	1909	10.37	1826	10.37	1244	10.37	714
10.375	1834	10.375	1713	10.375	1241	10.375	854
10.38	1982	10.38	1823	10.38	1172	10.38	889
10.385	2161	10.385	2211	10.385	1104	10.385	839
10.39	2288	10.39	2590	10.39	1111	10.39	781
10.395	2426	10.395	2788	10.395	1150	10.395	729
10.4	2734	10.4	2885	10.4	1196	10.4	845
10.405	3192	10.405	3053	10.405	1306	10.405	944
10.41	3398	10.41	3247	10.41	1385	10.41	928
10.415	3376	10.415	3464	10.415	1281	10.415	934
10.42	3109	10.42	3517	10.42	1088	10.42	1004
10.425	2844	10.425	3330	10.425	1209	10.425	1059
10.43	2922	10.43	3092	10.43	1357	10.43	1119
10.435	3038	10.435	2837	10.435	1397	10.435	1169
10.44	2965	10.44	2803	10.44	1356	10.44	1125
10.445	2884	10.445	2785	10.445	1248	10.445	1068
10.45	2695	10.45	2659	10.45	1259	10.45	1074
10.455	2484	10.455	2663	10.455	1257	10.455	1087
10.46	2473	10.46	2674	10.46	1112	10.46	1026
10.465	2620	10.465	2689	10.465	1087	10.465	952
10.47	2613	10.47	2792	10.47	1222	10.47	919
10.475	2645	10.475	2880	10.475	1258	10.475	1010
10.48	2857	10.48	2939	10.48	1267	10.48	1246
10.485	2851	10.485	3234	10.485	1379	10.485	1350
10.49	2795	10.49	3628	10.49	1546	10.49	1421
10.495	2837	10.495	3573	10.495	1577	10.495	1365
10.5	2648	10.5	3233	10.5	1416	10.5	1193
10.505	2420	10.505	2924	10.505	1307	10.505	1070
10.51	2415	10.51	2863	10.51	1289	10.51	1002
10.515	2810	10.515	3139	10.515	1255	10.515	919
10.52	3081	10.52	3349	10.52	1174	10.52	835
10.525	3042	10.525	3356	10.525	1177	10.525	833
10.53	3028	10.53	3330	10.53	1245	10.53	949
10.535	3078	10.535	3177	10.535	1303	10.535	971
10.54	3039	10.54	2993	10.54	1311	10.54	877
10.545	3255	10.545	3332	10.545	1202	10.545	872
10.55	3944	10.55	3975	10.55	1139	10.55	917
10.555	4904	10.555	4586	10.555	1122	10.555	905
10.56	5417	10.56	5145	10.56	1271	10.56	840
10.565	5353	10.565	5373	10.565	1421	10.565	840
10.57	5433	10.57	5763	10.57	1393	10.57	964
10.575	5908	10.575	6404	10.575	1184	10.575	1022
10.58	5999	10.58	6547	10.58	1057	10.58	948
10.585	5406	10.585	6210	10.585	1205	10.585	853
10.59	4712	10.59	5461	10.59	1309	10.59	952
10.595	4128	10.595	4670	10.595	1256	10.595	1010
10.6	4042	10.6	4433	10.6	1379	10.6	1054
10.605	4307	10.605	4480	10.605	1512	10.605	1013
10.61	4247	10.61	4438	10.61	1512	10.61	1061
10.615	3809	10.615	4249	10.615	1492	10.615	1128
10.62	3407	10.62	3876	10.62	1405	10.62	1126
10.625	3407	10.625	3671	10.625	1383	10.625	1072
10.63	3588	10.63	3850	10.63	1437	10.63	946
10.635	3554	10.635	4152	10.635	1447	10.635	1013
10.64	3549	10.64	4224	10.64	1458	10.64	1056
10.645	3661	10.645	4112	10.645	1481	10.645	992
10.65	3501	10.65	3864	10.65	1326	10.65	931
10.655	3188	10.655	3538	10.655	1214	10.655	896
10.66	2724	10.66	3201	10.66	1338	10.66	807
10.665	2495	10.665	2878	10.665	1358	10.665	652
10.67	2558	10.67	2667	10.67	1325	10.67	669
10.675	2604	10.675	2680	10.675	1330	10.675	850
10.68	2510	10.68	2720	10.68	1352	10.68	901
10.685	2590	10.685	2782	10.685	1273	10.685	788
10.69	2756	10.69	2785	10.69	1195	10.69	865
10.695	2885	10.695	2800	10.695	1259	10.695	892
10.7	2949	10.7	2980	10.7	1362	10.7	994
10.705	2865	10.705	3217	10.705	1307	10.705	1056
10.71	2879	10.71	3130	10.71	1246	10.71	907
10.715	2806	10.715	2879	10.715	1395	10.715	823
10.72	2646	10.72	2869	10.72	1490	10.72	988
10.725	2766	10.725	3079	10.725	1444	10.725	1061
10.73	2860	10.73	3252	10.73	1418	10.73	1002
10.735	2921	10.735	3311	10.735	1394	10.735	938
10.74	3145	10.74	3227	10.74	1399	10.74	914
10.745	3334	10.745	3435	10.745	1506	10.745	956
10.75	3685	10.75	3831	10.75	1574	10.75	1043
10.755	3936	10.755	4053	10.755	1550	10.755	1098
10.76	3799	10.76	3980	10.76	1448	10.76	1077
10.765	3752	10.765	3935	10.765	1466	10.765	1017
10.77	3934	10.77	4371	10.77	1586	10.77	996
10.775	4121	10.775	4878	10.775	1672	10.775	1060
10.78	4196	10.78	5092	10.78	1692	10.78	1130
10.785	4404	10.785	5279	10.785	1751	10.785	1131
10.79	4626	10.79	5375	10.79	1778	10.79	1185
10.795	4455	10.795	5226	10.795	1719	10.795	1253
10.8	4100	10.8	4919	10.8	1566	10.8	1167
10.805	3922	10.805	4495	10.805	1400	10.805	1119
10.81	3492	10.81	4118	10.81	1388	10.81	1131
10.815	3193	10.815	3853	10.815	1614	10.815	1033
10.82	3008	10.82	3654	10.82	1592	10.82	932
10.825	2921	10.825	3412	10.825	1361	10.825	826
10.83	3063	10.83	3231	10.83	1343	10.83	776
10.835	3169	10.835	3300	10.835	1270	10.835	820
10.84	3304	10.84	3375	10.84	1217	10.84	826
10.845	3552	10.845	3530	10.845	1304	10.845	848
10.85	3728	10.85	3846	10.85	1398	10.85	935
10.855	3807	10.855	4145	10.855	1284	10.855	1001
10.86	3698	10.86	4212	10.86	1226	10.86	968
10.865	3369	10.865	3972	10.865	1302	10.865	907
10.87	3097	10.87	3537	10.87	1462	10.87	875
10.875	2949	10.875	3422	10.875	1397	10.875	790
10.88	3047	10.88	3564	10.88	1220	10.88	781
10.885	3144	10.885	3675	10.885	1376	10.885	876
10.89	3022	10.89	3849	10.89	1558	10.89	1040
10.895	3262	10.895	3891	10.895	1558	10.895	1103
10.9	3644	10.9	3739	10.9	1465	10.9	1135
10.905	3671	10.905	3655	10.905	1326	10.905	1034
10.91	3893	10.91	3789	10.91	1253	10.91	885
10.915	4140	10.915	4166	10.915	1307	10.915	873
10.92	4018	10.92	4599	10.92	1324	10.92	918
10.925	3984	10.925	4757	10.925	1293	10.925	864
10.93	3988	10.93	4356	10.93	1327	10.93	841
10.935	3854	10.935	3881	10.935	1391	10.935	879
10.94	3743	10.94	3720	10.94	1459	10.94	967
10.945	3562	10.945	3717	10.945	1497	10.945	943
10.95	3693	10.95	4072	10.95	1565	10.95	912
10.955	3807	10.955	4272	10.955	1635	10.955	989
10.96	3740	10.96	4235	10.96	1534	10.96	960
10.965	3682	10.965	4261	10.965	1429	10.965	906
10.97	3698	10.97	4221	10.97	1505	10.97	906
10.975	3836	10.975	3987	10.975	1473	10.975	858
10.98	3908	10.98	4010	10.98	1338	10.98	825
10.985	3902	10.985	4290	10.985	1355	10.985	807
10.99	3945	10.99	4424	10.99	1401	10.99	826
10.995	3940	10.995	4480	10.995	1392	10.995	922
11	3899	11	4664	11	1445	11	1000
11.005	4023	11.005	4667	11.005	1536	11.005	1063
11.01	4383	11.01	4653	11.01	1639	11.01	1031
11.015	4371	11.015	4593	11.015	1488	11.015	968
11.02	4136	11.02	4404	11.02	1312	11.02	956
11.025	4006	11.025	4459	11.025	1392	11.025	890
11.03	3847	11.03	4608	11.03	1527	11.03	872
11.035	3801	11.035	4530	11.035	1594	11.035	1001
11.04	4007	11.04	4349	11.04	1587	11.04	1177
11.045	4126	11.045	4209	11.045	1533	11.045	1202
11.05	3989	11.05	4253	11.05	1439	11.05	1061
11.055	3785	11.055	4397	11.055	1386	11.055	944
11.06	3642	11.06	4582	11.06	1300	11.06	902
11.065	3453	11.065	4719	11.065	1248	11.065	930
11.07	3483	11.07	4489	11.07	1484	11.07	936
11.075	3515	11.075	4171	11.075	1785	11.075	864
11.08	3682	11.08	3945	11.08	1530	11.08	948
11.085	3671	11.085	3845	11.085	1308	11.085	1132
11.09	3630	11.09	4065	11.09	1223	11.09	1109
11.095	3927	11.095	4557	11.095	1220	11.095	935
11.1	4213	11.1	4969	11.1	1256	11.1	816
11.105	4269	11.105	5007	11.105	1379	11.105	755
11.11	4328	11.11	5163	11.11	1575	11.11	911
11.115	4413	11.115	5325	11.115	1644	11.115	1015
11.12	4452	11.12	4969	11.12	1594	11.12	974
11.125	4241	11.125	4540	11.125	1705	11.125	1010
11.13	3879	11.13	4334	11.13	1674	11.13	942
11.135	3692	11.135	4131	11.135	1483	11.135	904
11.14	3596	11.14	4096	11.14	1409	11.14	932
11.145	3657	11.145	4163	11.145	1588	11.145	1000
11.15	4008	11.15	4182	11.15	1654	11.15	923
11.155	4361	11.155	4581	11.155	1628	11.155	946
11.16	4532	11.16	5273	11.16	1705	11.16	1134
11.165	4502	11.165	5518	11.165	1847	11.165	1294
11.17	4229	11.17	5120	11.17	1730	11.17	1128
11.175	4159	11.175	4882	11.175	1632	11.175	1107
11.18	4581	11.18	4974	11.18	1642	11.18	1042
11.185	5053	11.185	5396	11.185	1695	11.185	1007
11.19	5226	11.19	5863	11.19	1728	11.19	1076
11.195	5212	11.195	6011	11.195	1800	11.195	1259
11.2	4988	11.2	6055	11.2	2041	11.2	1417
11.205	4629	11.205	6021	11.205	2185	11.205	1499
11.21	4586	11.21	5777	11.21	2071	11.21	1501
11.215	4535	11.215	5311	11.215	1996	11.215	1408
11.22	4339	11.22	4835	11.22	1926	11.22	1474
11.225	4408	11.225	4826	11.225	2004	11.225	1627
11.23	4497	11.23	5075	11.23	2050	11.23	1541
11.235	4309	11.235	5002	11.235	1957	11.235	1332
11.24	4362	11.24	4851	11.24	1855	11.24	1324
11.245	4491	11.245	4874	11.245	1928	11.245	1330
11.25	4427	11.25	5157	11.25	1998	11.25	1135
11.255	4493	11.255	5310	11.255	1998	11.255	1091
11.26	4630	11.26	5198	11.26	1921	11.26	985
11.265	4608	11.265	5073	11.265	1776	11.265	1024
11.27	4662	11.27	4931	11.27	1486	11.27	1113
11.275	4784	11.275	4997	11.275	1393	11.275	1049
11.28	4973	11.28	5336	11.28	1542	11.28	883
11.285	5204	11.285	5614	11.285	1737	11.285	869
11.29	5320	11.29	5902	11.29	1816	11.29	1013
11.295	5714	11.295	6327	11.295	1797	11.295	1096
11.3	5812	11.3	6457	11.3	1679	11.3	1113
11.305	5338	11.305	6071	11.305	1641	11.305	1167
11.31	5094	11.31	5655	11.31	1793	11.31	1233
11.315	5081	11.315	5414	11.315	1907	11.315	1235
11.32	5009	11.32	5404	11.32	1934	11.32	1111
11.325	4717	11.325	5300	11.325	1903	11.325	1025
11.33	4683	11.33	5200	11.33	1792	11.33	1016
11.335	4986	11.335	5638	11.335	1760	11.335	1082
11.34	5200	11.34	6001	11.34	1865	11.34	1184
11.345	5083	11.345	5944	11.345	1895	11.345	1092
11.35	5029	11.35	5832	11.35	1791	11.35	1000
11.355	4908	11.355	5566	11.355	1801	11.355	1016
11.36	4687	11.36	5293	11.36	1833	11.36	965
11.365	4601	11.365	5113	11.365	1852	11.365	1007
11.37	4607	11.37	4940	11.37	1896	11.37	1065
11.375	4588	11.375	4852	11.375	1909	11.375	1066
11.38	4494	11.38	4947	11.38	1905	11.38	1078
11.385	4415	11.385	5161	11.385	1869	11.385	1033
11.39	4644	11.39	5299	11.39	1867	11.39	923
11.395	4628	11.395	5416	11.395	1775	11.395	923
11.4	4536	11.4	5457	11.4	1568	11.4	1030
11.405	5184	11.405	5903	11.405	1554	11.405	1074
11.41	7104	11.41	7648	11.41	1665	11.41	1014
11.415	10556	11.415	11227	11.415	1781	11.415	981
11.42	14182	11.42	15576	11.42	1829	11.42	1020
11.425	16038	11.425	18325	11.425	1854	11.425	1086
11.43	15464	11.43	17658	11.43	1847	11.43	1163
11.435	12499	11.435	14261	11.435	1819	11.435	1056
11.44	8667	11.44	10329	11.44	1815	11.44	987
11.445	6048	11.445	7322	11.445	1907	11.445	1060
11.45	5062	11.45	5880	11.45	1903	11.45	1101
11.455	4690	11.455	5390	11.455	1811	11.455	1111
11.46	4308	11.46	5183	11.46	1773	11.46	1053
11.465	4296	11.465	5163	11.465	1791	11.465	1033
11.47	4511	11.47	5202	11.47	1770	11.47	1222
11.475	4593	11.475	5247	11.475	1841	11.475	1309
11.48	4569	11.48	5279	11.48	1913	11.48	1138
11.485	4483	11.485	5333	11.485	1913	11.485	1064
11.49	4516	11.49	5341	11.49	1755	11.49	1198
11.495	4612	11.495	5374	11.495	1631	11.495	1319
11.5	4549	11.5	5670	11.5	1703	11.5	1338
11.505	4617	11.505	5882	11.505	1895	11.505	1248
11.51	4852	11.51	5725	11.51	1972	11.51	1151
11.515	4950	11.515	5420	11.515	2058	11.515	1096
11.52	4739	11.52	5181	11.52	2101	11.52	1058
11.525	4484	11.525	5232	11.525	1957	11.525	1061
11.53	4637	11.53	5340	11.53	1882	11.53	1109
11.535	4792	11.535	5147	11.535	1842	11.535	1122
11.54	4460	11.54	5041	11.54	1898	11.54	1129
11.545	4234	11.545	5009	11.545	1880	11.545	1088
11.55	4208	11.55	4989	11.55	1772	11.55	1059
11.555	4446	11.555	5201	11.555	1755	11.555	1089
11.56	4709	11.56	5350	11.56	1933	11.56	1033
11.565	4808	11.565	5554	11.565	2106	11.565	1009
11.57	4976	11.57	5746	11.57	2138	11.57	1054
11.575	5255	11.575	5824	11.575	2138	11.575	1142
11.58	5992	11.58	6628	11.58	2094	11.58	1465
11.585	7544	11.585	8072	11.585	2178	11.585	2080
11.59	9474	11.59	9776	11.59	2551	11.59	3107
11.595	11351	11.595	11212	11.595	2796	11.595	4190
11.6	11785	11.6	11574	11.6	2695	11.6	4357
11.605	10187	11.605	10503	11.605	2451	11.605	3624
11.61	8038	11.61	8583	11.61	2193	11.61	2729
11.615	6623	11.615	6940	11.615	2090	11.615	2020
11.62	6016	11.62	6034	11.62	2028	11.62	1749
11.625	5757	11.625	5746	11.625	2136	11.625	1560
11.63	5582	11.63	5726	11.63	2173	11.63	1198
11.635	5581	11.635	5714	11.635	2164	11.635	1030
11.64	5613	11.64	5942	11.64	2077	11.64	1132
11.645	5445	11.645	6147	11.645	1983	11.645	1164
11.65	5529	11.65	6160	11.65	1994	11.65	1123
11.655	5793	11.655	6083	11.655	1922	11.655	1180
11.66	5716	11.66	5905	11.66	1827	11.66	1223
11.665	5563	11.665	5963	11.665	1870	11.665	1275
11.67	5540	11.67	6282	11.67	1886	11.67	1429
11.675	5655	11.675	6482	11.675	1968	11.675	1505
11.68	5627	11.68	6801	11.68	2134	11.68	1393
11.685	5503	11.685	6747	11.685	2286	11.685	1446
11.69	5606	11.69	6254	11.69	2342	11.69	1629
11.695	5653	11.695	6052	11.695	2237	11.695	1593
11.7	5464	11.7	5951	11.7	2115	11.7	1466
11.705	5335	11.705	5936	11.705	2076	11.705	1439
11.71	5120	11.71	5885	11.71	2057	11.71	1344
11.715	5085	11.715	5794	11.715	1954	11.715	1152
11.72	5359	11.72	6014	11.72	1836	11.72	1093
11.725	5403	11.725	6055	11.725	1935	11.725	1211
11.73	5161	11.73	5948	11.73	2001	11.73	1170
11.735	4749	11.735	5887	11.735	1929	11.735	1059
11.74	4588	11.74	5478	11.74	1829	11.74	1190
11.745	4795	11.745	5138	11.745	1772	11.745	1355
11.75	4990	11.75	5518	11.75	1786	11.75	1346
11.755	5259	11.755	5795	11.755	1960	11.755	1290
11.76	5460	11.76	5653	11.76	2122	11.76	1185
11.765	5344	11.765	5569	11.765	2007	11.765	1136
11.77	5076	11.77	5617	11.77	1845	11.77	1185
11.775	5062	11.775	5575	11.775	1713	11.775	1303
11.78	5046	11.78	5644	11.78	1779	11.78	1294
11.785	4892	11.785	5614	11.785	2084	11.785	1143
11.79	5096	11.79	5573	11.79	2250	11.79	1129
11.795	5208	11.795	5768	11.795	2271	11.795	1277
11.8	5195	11.8	6125	11.8	2193	11.8	1245
11.805	5135	11.805	6383	11.805	2139	11.805	1321
11.81	5146	11.81	6365	11.81	2286	11.81	1429
11.815	5488	11.815	6503	11.815	2467	11.815	1433
11.82	5749	11.82	6566	11.82	2364	11.82	1400
11.825	5740	11.825	6413	11.825	2224	11.825	1325
11.83	5928	11.83	6390	11.83	2358	11.83	1231
11.835	6048	11.835	6352	11.835	2519	11.835	1218
11.84	5981	11.84	6463	11.84	2449	11.84	1260
11.845	5921	11.845	6515	11.845	2267	11.845	1308
11.85	5751	11.85	6421	11.85	1924	11.85	1200
11.855	5599	11.855	6434	11.855	1845	11.855	1186
11.86	5613	11.86	6206	11.86	2101	11.86	1303
11.865	5742	11.865	6009	11.865	2109	11.865	1381
11.87	5628	11.87	6493	11.87	1880	11.87	1382
11.875	5577	11.875	7135	11.875	1875	11.875	1425
11.88	5901	11.88	7117	11.88	2002	11.88	1444
11.885	6189	11.885	7136	11.885	2063	11.885	1389
11.89	6356	11.89	7491	11.89	2100	11.89	1330
11.895	6304	11.895	7281	11.895	2059	11.895	1399
11.9	6201	11.9	6794	11.9	2118	11.9	1386
11.905	6366	11.905	6771	11.905	2197	11.905	1286
11.91	6511	11.91	6950	11.91	2158	11.91	1243
11.915	6246	11.915	6897	11.915	2087	11.915	1251
11.92	5844	11.92	6485	11.92	2082	11.92	1313
11.925	5762	11.925	6326	11.925	2269	11.925	1403
11.93	6056	11.93	6680	11.93	2460	11.93	1585
11.935	6057	11.935	6874	11.935	2388	11.935	1610
11.94	6015	11.94	7051	11.94	2304	11.94	1703
11.945	6311	11.945	7216	11.945	2505	11.945	1811
11.95	6405	11.95	7164	11.95	2592	11.95	1656
11.955	6182	11.955	7202	11.955	2402	11.955	1565
11.96	5952	11.96	7040	11.96	2123	11.96	1592
11.965	6003	11.965	6735	11.965	2102	11.965	1552
11.97	6356	11.97	6774	11.97	2232	11.97	1541
11.975	6685	11.975	6895	11.975	2333	11.975	1500
11.98	6911	11.98	6903	11.98	2495	11.98	1332
11.985	7112	11.985	7216	11.985	2596	11.985	1251
11.99	7356	11.99	7595	11.99	2505	11.99	1357
11.995	7749	11.995	7671	11.995	2501	11.995	1377
12	8690	12	7505	12	2666	12	1353
12.005	9930	12.005	7361	12.005	2484	12.005	1465
12.01	9799	12.01	7240	12.01	2390	12.01	1478
12.015	8333	12.015	6810	12.015	2523	12.015	1334
12.02	7194	12.02	6423	12.02	2331	12.02	1319
12.025	6525	12.025	6388	12.025	2096	12.025	1398
12.03	5999	12.03	6478	12.03	2140	12.03	1397
12.035	6062	12.035	6663	12.035	2176	12.035	1327
12.04	6655	12.04	6762	12.04	2230	12.04	1347
12.045	7335	12.045	6727	12.045	2390	12.045	1393
12.05	8333	12.05	6877	12.05	2456	12.05	1366
12.055	9236	12.055	7019	12.055	2455	12.055	1357
12.06	9420	12.06	7117	12.06	2437	12.06	1403
12.065	9227	12.065	7191	12.065	2557	12.065	1390
12.07	8668	12.07	7173	12.07	2589	12.07	1428
12.075	8115	12.075	7390	12.075	2553	12.075	1435
12.08	7629	12.08	7661	12.08	2581	12.08	1439
12.085	7025	12.085	7620	12.085	2557	12.085	1329
12.09	6835	12.09	7525	12.09	2504	12.09	1261
12.095	7057	12.095	7349	12.095	2396	12.095	1228
12.1	7303	12.1	7103	12.1	2338	12.1	1393
12.105	7059	12.105	7054	12.105	2462	12.105	1536
12.11	6572	12.11	7249	12.11	2615	12.11	1548
12.115	6326	12.115	7329	12.115	2651	12.115	1620
12.12	6473	12.12	7508	12.12	2509	12.12	1561
12.125	6900	12.125	7626	12.125	2392	12.125	1514
12.13	7293	12.13	7680	12.13	2485	12.13	1605
12.135	7679	12.135	8148	12.135	2567	12.135	1667
12.14	8046	12.14	8669	12.14	2751	12.14	1754
12.145	8397	12.145	8961	12.145	2973	12.145	1863
12.15	8745	12.15	9171	12.15	2836	12.15	1888
12.155	8639	12.155	9078	12.155	2558	12.155	1738
12.16	7942	12.16	8536	12.16	2467	12.16	1460
12.165	7293	12.165	7840	12.165	2442	12.165	1428
12.17	6865	12.17	7566	12.17	2579	12.17	1580
12.175	6717	12.175	7574	12.175	2676	12.175	1641
12.18	6909	12.18	7681	12.18	2691	12.18	1510
12.185	7162	12.185	7758	12.185	2662	12.185	1511
12.19	7129	12.19	7562	12.19	2532	12.19	1473
12.195	6713	12.195	7222	12.195	2517	12.195	1446
12.2	6406	12.2	7094	12.2	2686	12.2	1390
12.205	6549	12.205	7365	12.205	2722	12.205	1246
12.21	6589	12.21	7555	12.21	2739	12.21	1252
12.215	6666	12.215	7452	12.215	2771	12.215	1498
12.22	6946	12.22	7703	12.22	2731	12.22	1716
12.225	7301	12.225	8007	12.225	2704	12.225	1719
12.23	7552	12.23	8231	12.23	2626	12.23	1668
12.235	7133	12.235	8368	12.235	2494	12.235	1645
12.24	6538	12.24	8095	12.24	2473	12.24	1589
12.245	6455	12.245	7594	12.245	2581	12.245	1511
12.25	6576	12.25	7186	12.25	2702	12.25	1576
12.255	6470	12.255	7209	12.255	2828	12.255	1658
12.26	6685	12.26	8293	12.26	3321	12.26	1922
12.265	9788	12.265	11639	12.265	5423	12.265	4306
12.27	19947	12.27	21044	12.27	11179	12.27	12259
12.275	39611	12.275	41857	12.275	22614	12.275	28939
12.28	64559	12.28	71179	12.28	37035	12.28	50644
12.285	82369	12.285	90253	12.285	46469	12.285	64408
12.29	79654	12.29	83573	12.29	44636	12.29	60089
12.295	58066	12.295	58778	12.295	32913	12.295	42077
12.3	33383	12.3	34010	12.3	19362	12.3	22815
12.305	17965	12.305	18802	12.305	10236	12.305	11199
12.31	11711	12.31	12056	12.31	6080	12.31	6250
12.315	9232	12.315	9806	12.315	4497	12.315	4188
12.32	8122	12.32	9313	12.32	3820	12.32	3435
12.325	7716	12.325	9121	12.325	3579	12.325	3038
12.33	7561	12.33	8939	12.33	3444	12.33	2781
12.335	7746	12.335	8704	12.335	3415	12.335	2722
12.34	7865	12.34	8860	12.34	3498	12.34	2758
12.345	7828	12.345	9479	12.345	3478	12.345	2736
12.35	7946	12.35	9948	12.35	3480	12.35	2859
12.355	8016	12.355	9782	12.355	3530	12.355	3014
12.36	7868	12.36	9106	12.36	3406	12.36	2938
12.365	7305	12.365	8420	12.365	3232	12.365	2632
12.37	6831	12.37	7981	12.37	3167	12.37	2325
12.375	6671	12.375	7678	12.375	3029	12.375	2170
12.38	6448	12.38	7491	12.38	2818	12.38	2115
12.385	6535	12.385	7309	12.385	2737	12.385	2115
12.39	6881	12.39	7180	12.39	2763	12.39	2075
12.395	6868	12.395	7409	12.395	2669	12.395	1980
12.4	6987	12.4	7741	12.4	2560	12.4	1906
12.405	7154	12.405	7842	12.405	2564	12.405	1785
12.41	6874	12.41	7864	12.41	2666	12.41	1645
12.415	6600	12.415	7683	12.415	2729	12.415	1639
12.42	6533	12.42	7481	12.42	2735	12.42	1672
12.425	6505	12.425	7628	12.425	2827	12.425	1644
12.43	6575	12.43	7531	12.43	3078	12.43	1717
12.435	6884	12.435	7315	12.435	3043	12.435	1935
12.44	6896	12.44	7499	12.44	2828	12.44	2042
12.445	6598	12.445	7645	12.445	2811	12.445	2057
12.45	6566	12.45	7511	12.45	2846	12.45	1960
12.455	6672	12.455	7532	12.455	2968	12.455	1825
12.46	6653	12.46	7951	12.46	3025	12.46	1691
12.465	6697	12.465	8172	12.465	2784	12.465	1645
12.47	7009	12.47	7962	12.47	2566	12.47	1700
12.475	7368	12.475	7941	12.475	2602	12.475	1761
12.48	7613	12.48	7974	12.48	2793	12.48	1816
12.485	7540	12.485	7855	12.485	2978	12.485	1951
12.49	7310	12.49	7968	12.49	3095	12.49	1836
12.495	7027	12.495	8065	12.495	2966	12.495	1702
12.5	6775	12.5	7984	12.5	2798	12.5	1829
12.505	6931	12.505	8179	12.505	2973	12.505	2044
12.51	7372	12.51	8419	12.51	3285	12.51	2009
12.515	7708	12.515	8437	12.515	3290	12.515	1928
12.52	7500	12.52	8578	12.52	2966	12.52	1928
12.525	7040	12.525	8508	12.525	2838	12.525	1882
12.53	6996	12.53	8119	12.53	2875	12.53	1838
12.535	6784	12.535	7776	12.535	3032	12.535	1758
12.54	6382	12.54	7594	12.54	3067	12.54	1756
12.545	6386	12.545	7411	12.545	2900	12.545	1887
12.55	6426	12.55	7382	12.55	2787	12.55	1751
12.555	6480	12.555	7528	12.555	2892	12.555	1599
12.56	6488	12.56	7589	12.56	3018	12.56	1590
12.565	6502	12.565	7853	12.565	3014	12.565	1681
12.57	6748	12.57	8091	12.57	2917	12.57	1686
12.575	6923	12.575	7855	12.575	2800	12.575	1652
12.58	6692	12.58	7864	12.58	2792	12.58	1798
12.585	6507	12.585	8043	12.585	3061	12.585	1931
12.59	6713	12.59	8017	12.59	3212	12.59	1854
12.595	6788	12.595	8017	12.595	3128	12.595	1818
12.6	6556	12.6	8164	12.6	3002	12.6	1814
12.605	6466	12.605	8011	12.605	2912	12.605	1813
12.61	6589	12.61	7779	12.61	2874	12.61	1769
12.615	6884	12.615	8043	12.615	2924	12.615	1700
12.62	8614	12.62	9378	12.62	2925	12.62	1693
12.625	13537	12.625	12970	12.625	2913	12.625	1804
12.63	21940	12.63	19632	12.63	2863	12.63	1869
12.635	31045	12.635	27912	12.635	2856	12.635	1801
12.64	35907	12.64	33005	12.64	2917	12.64	1917
12.645	33290	12.645	31363	12.645	3032	12.645	1997
12.65	25834	12.65	25053	12.65	3097	12.65	2019
12.655	18924	12.655	18504	12.655	3231	12.655	2088
12.66	14507	12.66	14258	12.66	3250	12.66	2130
12.665	12181	12.665	12146	12.665	3109	12.665	2099
12.67	11670	12.67	11425	12.67	3066	12.67	2027
12.675	12156	12.675	11448	12.675	3325	12.675	2098
12.68	12589	12.68	11473	12.68	3465	12.68	2316
12.685	12463	12.685	11113	12.685	3450	12.685	2497
12.69	11652	12.69	10438	12.69	3154	12.69	2184
12.695	10538	12.695	9935	12.695	3011	12.695	2041
12.7	9467	12.7	9591	12.7	3193	12.7	2133
12.705	8668	12.705	9320	12.705	3356	12.705	2032
12.71	8394	12.71	9141	12.71	3525	12.71	1874
12.715	8326	12.715	8852	12.715	3543	12.715	1853
12.72	8157	12.72	8732	12.72	3406	12.72	1974
12.725	7830	12.725	8876	12.725	3318	12.725	2082
12.73	7687	12.73	8799	12.73	3325	12.73	2055
12.735	7899	12.735	8834	12.735	3359	12.735	2073
12.74	8217	12.74	9066	12.74	3346	12.74	2002
12.745	8289	12.745	9094	12.745	3390	12.745	1928
12.75	8180	12.75	9364	12.75	3240	12.75	1939
12.755	8304	12.755	9459	12.755	3139	12.755	2150
12.76	8646	12.76	9337	12.76	3285	12.76	2328
12.765	8783	12.765	9394	12.765	3453	12.765	2292
12.77	8755	12.77	9381	12.77	3573	12.77	2460
12.775	8732	12.775	9432	12.775	3700	12.775	2852
12.78	8396	12.78	9534	12.78	3822	12.78	2921
12.785	8070	12.785	9384	12.785	3604	12.785	2666
12.79	8067	12.79	9004	12.79	3259	12.79	2478
12.795	8309	12.795	8776	12.795	3160	12.795	2506
12.8	8979	12.8	8995	12.8	3433	12.8	2420
12.805	9730	12.805	9472	12.805	3732	12.805	2273
12.81	10482	12.81	9758	12.81	3748	12.81	2337
12.815	10862	12.815	9669	12.815	3839	12.815	2468
12.82	10128	12.82	9230	12.82	3902	12.82	2443
12.825	8908	12.825	8672	12.825	3677	12.825	2430
12.83	8130	12.83	8628	12.83	3604	12.83	2440
12.835	7639	12.835	8848	12.835	3559	12.835	2279
12.84	7236	12.84	8442	12.84	3373	12.84	2115
12.845	6893	12.845	7917	12.845	3306	12.845	2142
12.85	6581	12.85	7787	12.85	3355	12.85	2155
12.855	6448	12.855	7849	12.855	3324	12.855	2206
12.86	6633	12.86	7930	12.86	3257	12.86	2165
12.865	6753	12.865	7904	12.865	3067	12.865	2176
12.87	6663	12.87	8247	12.87	3038	12.87	2247
12.875	6698	12.875	8870	12.875	3274	12.875	2280
12.88	6531	12.88	8885	12.88	3467	12.88	2314
12.885	6356	12.885	8299	12.885	3474	12.885	2211
12.89	6801	12.89	7881	12.89	3362	12.89	2037
12.895	7207	12.895	7987	12.895	3225	12.895	2088
12.9	7360	12.9	8252	12.9	3209	12.9	2149
12.905	7762	12.905	8456	12.905	3389	12.905	2085
12.91	7893	12.91	8483	12.91	3613	12.91	2150
12.915	7461	12.915	8173	12.915	3759	12.915	2259
12.92	7117	12.92	8007	12.92	3662	12.92	2201
12.925	6913	12.925	8281	12.925	3421	12.925	2162
12.93	6963	12.93	8337	12.93	3302	12.93	2163
12.935	7207	12.935	8189	12.935	3415	12.935	2071
12.94	6935	12.94	7967	12.94	3593	12.94	2094
12.945	6535	12.945	7816	12.945	3424	12.945	2238
12.95	6776	12.95	8196	12.95	3410	12.95	2176
12.955	7206	12.955	8730	12.955	3541	12.955	2036
12.96	7438	12.96	8634	12.96	3437	12.96	2180
12.965	7473	12.965	8303	12.965	3400	12.965	2298
12.97	7295	12.97	8427	12.97	3476	12.97	2238
12.975	7145	12.975	8759	12.975	3612	12.975	2195
12.98	6771	12.98	8610	12.98	3617	12.98	2137
12.985	6223	12.985	8194	12.985	3569	12.985	2160
12.99	6340	12.99	7874	12.99	3481	12.99	2237
12.995	6893	12.995	7849	12.995	3436	12.995	2145
13	6777	13	8027	13	3495	13	2117
13.005	6369	13.005	8149	13.005	3474	13.005	2311
13.01	6186	13.01	8289	13.01	3374	13.01	2421
13.015	6204	13.015	8422	13.015	3337	13.015	2293
13.02	6216	13.02	8228	13.02	3366	13.02	2148
13.025	6327	13.025	7864	13.025	3479	13.025	2104
13.03	6519	13.03	7687	13.03	3425	13.03	2331
13.035	6524	13.035	7860	13.035	3428	13.035	2395
13.04	6395	13.04	7994	13.04	3692	13.04	2246
13.045	6586	13.045	7698	13.045	3630	13.045	2028
13.05	6880	13.05	7638	13.05	3546	13.05	2285
13.055	6599	13.055	8043	13.055	3528	13.055	2585
13.06	6195	13.06	8221	13.06	3502	13.06	2530
13.065	6380	13.065	8141	13.065	3477	13.065	2469
13.07	6721	13.07	8147	13.07	3392	13.07	2487
13.075	6781	13.075	8289	13.075	3371	13.075	2361
13.08	6687	13.08	8459	13.08	3640	13.08	2374
13.085	6574	13.085	8652	13.085	3772	13.085	2473
13.09	6526	13.09	8646	13.09	3621	13.09	2419
13.095	6449	13.095	8653	13.095	3603	13.095	2577
13.1	6428	13.1	8774	13.1	3694	13.1	2529
13.105	6582	13.105	8603	13.105	3837	13.105	2499
13.11	6815	13.11	8759	13.11	3936	13.11	2547
13.115	7187	13.115	9242	13.115	3986	13.115	2631
13.12	7709	13.12	9598	13.12	4100	13.12	2795
13.125	7726	13.125	9643	13.125	4204	13.125	2733
13.13	7430	13.13	9084	13.13	4322	13.13	2519
13.135	7256	13.135	8501	13.135	4245	13.135	2561
13.14	7010	13.14	8440	13.14	3992	13.14	2693
13.145	6600	13.145	8508	13.145	4002	13.145	2643
13.15	6456	13.15	8431	13.15	4150	13.15	2420
13.155	6408	13.155	8493	13.155	4224	13.155	2390
13.16	6355	13.16	8726	13.16	4207	13.16	2432
13.165	6376	13.165	8824	13.165	3961	13.165	2434
13.17	6382	13.17	8661	13.17	4005	13.17	2499
13.175	6552	13.175	8443	13.175	4227	13.175	2492
13.18	6888	13.18	8595	13.18	4737	13.18	2576
13.185	7845	13.185	9459	13.185	5274	13.185	3090
13.19	9445	13.19	10460	13.19	5550	13.19	3834
13.195	10574	13.195	10678	13.195	5590	13.195	4088
13.2	10212	13.2	10437	13.2	5352	13.2	3938
13.205	9185	13.205	9921	13.205	5057	13.205	3544
13.21	8211	13.21	9229	13.21	4965	13.21	3167
13.215	7596	13.215	8820	13.215	4771	13.215	3137
13.22	7614	13.22	8940	13.22	4459	13.22	3246
13.225	7601	13.225	9014	13.225	4239	13.225	3151
13.23	7390	13.23	8981	13.23	4214	13.23	3175
13.235	7474	13.235	9155	13.235	4503	13.235	3154
13.24	7571	13.24	9025	13.24	4635	13.24	2970
13.245	7518	13.245	8758	13.245	4442	13.245	3046
13.25	7710	13.25	8810	13.25	4494	13.25	3267
13.255	7729	13.255	9198	13.255	4738	13.255	3183
13.26	7419	13.26	9721	13.26	4625	13.26	2888
13.265	7340	13.265	9702	13.265	4516	13.265	2800
13.27	7514	13.27	9489	13.27	4631	13.27	2827
13.275	7430	13.275	9222	13.275	4457	13.275	2768
13.28	6885	13.28	8644	13.28	4178	13.28	2687
13.285	6509	13.285	8475	13.285	4053	13.285	2813
13.29	6658	13.29	8622	13.29	4300	13.29	2918
13.295	6879	13.295	8640	13.295	4550	13.295	2787
13.3	6725	13.3	8725	13.3	4220	13.3	2683
13.305	6373	13.305	8770	13.305	4094	13.305	2757
13.31	6318	13.31	8593	13.31	4293	13.31	3007
13.315	6614	13.315	8424	13.315	4312	13.315	2958
13.32	6888	13.32	8558	13.32	4261	13.32	2615
13.325	6916	13.325	8558	13.325	4238	13.325	2565
13.33	7067	13.33	8543	13.33	4022	13.33	2648
13.335	7278	13.335	8853	13.335	4012	13.335	2765
13.34	7165	13.34	8986	13.34	4072	13.34	2863
13.345	7032	13.345	9026	13.345	4016	13.345	2669
13.35	7068	13.35	8908	13.35	4035	13.35	2637
13.355	6970	13.355	8708	13.355	4266	13.355	2905
13.36	6560	13.36	8784	13.36	4276	13.36	2920
13.365	6520	13.365	8912	13.365	4059	13.365	2844
13.37	6830	13.37	9050	13.37	4022	13.37	2984
13.375	6769	13.375	9223	13.375	4229	13.375	3141
13.38	6661	13.38	9403	13.38	4553	13.38	3269
13.385	6974	13.385	9641	13.385	4764	13.385	3604
13.39	7442	13.39	9683	13.39	4772	13.39	3765
13.395	7723	13.395	9399	13.395	4685	13.395	3622
13.4	7872	13.4	9323	13.4	4798	13.4	3221
13.405	8710	13.405	9653	13.405	5202	13.405	2909
13.41	11444	13.41	10125	13.41	5470	13.41	2981
13.415	16395	13.415	10757	13.415	5473	13.415	3217
13.42	22054	13.42	11443	13.42	5250	13.42	3401
13.425	25024	13.425	11892	13.425	5053	13.425	3236
13.43	23018	13.43	11609	13.43	5180	13.43	3195
13.435	18503	13.435	10974	13.435	5494	13.435	3314
13.44	15063	13.44	10630	13.44	5547	13.44	3432
13.445	13458	13.445	10604	13.445	5421	13.445	3315
13.45	12492	13.45	10491	13.45	5336	13.45	3161
13.455	11768	13.455	9941	13.455	5457	13.455	3174
13.46	11264	13.46	9731	13.46	5530	13.46	3259
13.465	10515	13.465	9933	13.465	5559	13.465	3029
13.47	9709	13.47	10005	13.47	5478	13.47	2797
13.475	9234	13.475	9829	13.475	5201	13.475	2894
13.48	9064	13.48	9451	13.48	5077	13.48	3200
13.485	9043	13.485	9377	13.485	5089	13.485	3378
[truncated: 904 more rows]

## Sheet: Supplementary Fig. 8a
		Percentage of WT
	BcABA3 enzyme	triplicate-1	triplicate-2	triplicate-3	Average
	WT	100.048	101.743	98.2092	100
	C384A	7.03148	6.57814	7.23081	6.94681
	C387A	37.1315	37.2761	35.4114	36.6063
	C407A	8.38504	8.8866	9.41388	8.89518
	C410A	97.9455	100.759	106.289	101.664

## Sheet: Supplementary Fig. 10a
No enzyme		BcABA3		SkABA3
Ret.Time	Absolute Intensity	Ret.Time	Absolute Intensity	Ret.Time	Absolute Intensity
3.5	1608673	3.5	1597545	3.5	1615666
3.505	594520	3.505	580849	3.505	599411
3.51	102524	3.51	59722	3.51	106417
3.515	190815	3.515	121614	3.515	202075
3.52	154553	3.52	116012	3.52	170380
3.525	109028	3.525	96747	3.525	124971
3.53	118466	3.53	104627	3.53	140232
3.535	116195	3.535	102281	3.535	141478
3.54	113974	3.54	99407	3.54	136870
3.545	115375	3.545	102597	3.545	136593
3.55	114215	3.55	103329	3.55	135748
3.555	112036	3.555	102308	3.555	135932
3.56	112259	3.56	101851	3.56	136175
3.565	112928	3.565	101147	3.565	134960
3.57	112471	3.57	100245	3.57	132774
3.575	111679	3.575	100882	3.575	130800
3.58	109814	3.58	100576	3.58	129006
3.585	107932	3.585	99388	3.585	128138
3.59	107190	3.59	96940	3.59	127890
3.595	107214	3.595	95753	3.595	127064
3.6	108874	3.6	96074	3.6	126017
3.605	108363	3.605	96810	3.605	125784
3.61	104814	3.61	96053	3.61	124117
3.615	104102	3.615	95136	3.615	121440
3.62	103225	3.62	94587	3.62	119374
3.625	100226	3.625	93239	3.625	118503
3.63	97310	3.63	90090	3.63	119075
3.635	96270	3.635	87715	3.635	119126
3.64	94842	3.64	86505	3.64	117984
3.645	93634	3.645	86331	3.645	116561
3.65	93846	3.65	86315	3.65	114130
3.655	92558	3.655	85458	3.655	112685
3.66	91719	3.66	83718	3.66	112226
3.665	92628	3.665	82426	3.665	110330
3.67	93366	3.67	83205	3.67	108759
3.675	92774	3.675	84065	3.675	108072
3.68	92006	3.68	82920	3.68	108228
3.685	90427	3.685	82020	3.685	108867
3.69	89183	3.69	82447	3.69	109912
3.695	89163	3.695	80584	3.695	110214
3.7	88370	3.7	78548	3.7	109719
3.705	86841	3.705	78446	3.705	109617
3.71	86166	3.71	79972	3.71	108179
3.715	86085	3.715	80285	3.715	105361
3.72	87008	3.72	78367	3.72	103475
3.725	85619	3.725	76285	3.725	104415
3.73	84598	3.73	75815	3.73	103400
3.735	84603	3.735	77263	3.735	101276
3.74	86252	3.74	76918	3.74	100228
3.745	87573	3.745	75586	3.745	99632
3.75	86700	3.75	74584	3.75	99541
3.755	85498	3.755	72540	3.755	100945
3.76	83766	3.76	71262	3.76	101788
3.765	82438	3.765	71734	3.765	102226
3.77	82444	3.77	72021	3.77	99791
3.775	81775	3.775	70256	3.775	96598
3.78	81714	3.78	69099	3.78	96654
3.785	81919	3.785	69043	3.785	98178
3.79	81606	3.79	70262	3.79	98331
3.795	81608	3.795	72418	3.795	98466
3.8	82299	3.8	72628	3.8	99710
3.805	83773	3.805	71414	3.805	101814
3.81	84064	3.81	72340	3.81	101913
3.815	83971	3.815	73213	3.815	100550
3.82	85373	3.82	73224	3.82	103071
3.825	85133	3.825	73213	3.825	105479
3.83	86026	3.83	74098	3.83	105940
3.835	86336	3.835	75557	3.835	104339
3.84	86851	3.84	76802	3.84	102024
3.845	88416	3.845	76900	3.845	103560
3.85	91807	3.85	77440	3.85	106917
3.855	92696	3.855	79493	3.855	109086
3.86	90005	3.86	80399	3.86	109964
3.865	90152	3.865	80675	3.865	110562
3.87	91753	3.87	82114	3.87	111894
3.875	92955	3.875	83668	3.875	112441
3.88	93062	3.88	83926	3.88	112710
3.885	92449	3.885	83449	3.885	113193
3.89	93225	3.89	83141	3.89	115107
3.895	93767	3.895	83154	3.895	116658
3.9	93925	3.9	83687	3.9	116926
3.905	94086	3.905	84921	3.905	116445
3.91	94409	3.91	87150	3.91	116641
3.915	95231	3.915	87884	3.915	117324
3.92	95866	3.92	87151	3.92	117752
3.925	95019	3.925	85205	3.925	118036
3.93	93944	3.93	83454	3.93	118324
3.935	94399	3.935	84588	3.935	118837
3.94	95963	3.94	84969	3.94	118503
3.945	97353	3.945	84877	3.945	116443
3.95	95451	3.95	85031	3.95	113792
3.955	93193	3.955	84825	3.955	111989
3.96	92109	3.96	82787	3.96	110923
3.965	91320	3.965	81115	3.965	109210
3.97	91082	3.97	80795	3.97	109297
3.975	90501	3.975	81915	3.975	109948
3.98	90539	3.98	82847	3.98	110757
3.985	90994	3.985	81922	3.985	110516
3.99	90158	3.99	81226	3.99	110016
3.995	88512	3.995	81885	3.995	109107
4	87938	4	81483	4	107276
4.005	86781	4.005	81202	4.005	105858
4.01	87025	4.01	77927	4.01	105684
4.015	87402	4.015	76647	4.015	104621
4.02	89446	4.02	76257	4.02	103680
4.025	90213	4.025	76421	4.025	103442
4.03	89924	4.03	75608	4.03	103192
4.035	89834	4.035	75046	4.035	104441
4.04	89803	4.04	75292	4.04	104665
4.045	89029	4.045	75132	4.045	103606
4.05	87316	4.05	75124	4.05	102493
4.055	85891	4.055	76302	4.055	103208
4.06	85751	4.06	76547	4.06	104200
4.065	85588	4.065	74834	4.065	105969
4.07	85519	4.07	74599	4.07	106330
4.075	85345	4.075	74547	4.075	103732
4.08	84513	4.08	72646	4.08	102295
4.085	83303	4.085	72426	4.085	102441
4.09	82418	4.09	74383	4.09	102852
4.095	84870	4.095	74149	4.095	102811
4.1	84392	4.1	72584	4.1	103020
4.105	82212	4.105	72389	4.105	103353
4.11	82286	4.11	72155	4.11	101865
4.115	82825	4.115	70421	4.115	99172
4.12	80957	4.12	68003	4.12	98236
4.125	80550	4.125	65880	4.125	97416
4.13	82119	4.13	66713	4.13	97138
4.135	83128	4.135	67045	4.135	97547
4.14	82906	4.14	66197	4.14	97458
4.145	82030	4.145	64872	4.145	97723
4.15	81426	4.15	64835	4.15	96799
4.155	81338	4.155	61981	4.155	93998
4.16	80786	4.16	59216	4.16	92970
4.165	79635	4.165	60802	4.165	93166
4.17	80084	4.17	63603	4.17	93100
4.175	80562	4.175	65152	4.175	92811
4.18	80893	4.18	64805	4.18	92669
4.185	80933	4.185	63074	4.185	91952
4.19	79851	4.19	63353	4.19	91196
4.195	78769	4.195	65329	4.195	92273
4.2	79576	4.2	65765	4.2	91345
4.205	80736	4.205	65719	4.205	91310
4.21	80408	4.21	65608	4.21	91461
4.215	79904	4.215	63838	4.215	91558
4.22	79112	4.22	63342	4.22	91555
4.225	78774	4.225	65041	4.225	91057
4.23	79564	4.23	66494	4.23	90160
4.235	79761	4.235	66377	4.235	87803
4.24	79867	4.24	65109	4.24	85184
4.245	77513	4.245	63437	4.245	84970
4.25	76484	4.25	62389	4.25	85284
4.255	74908	4.255	61243	4.255	86500
4.26	76873	4.26	61441	4.26	85612
4.265	78517	4.265	63098	4.265	83192
4.27	77251	4.27	63888	4.27	84165
4.275	77258	4.275	64272	4.275	87219
4.28	77686	4.28	63258	4.28	87116
4.285	77772	4.285	62008	4.285	85061
4.29	76773	4.29	61601	4.29	84738
4.295	76715	4.295	60495	4.295	85035
4.3	77369	4.3	59811	4.3	84086
4.305	78159	4.305	59524	4.305	82577
4.31	77761	4.31	57668	4.31	82681
4.315	76908	4.315	55499	4.315	83004
4.32	76292	4.32	56428	4.32	81959
4.325	75902	4.325	57250	4.325	79977
4.33	76384	4.33	57508	4.33	78955
4.335	77581	4.335	58209	4.335	79217
4.34	78295	4.34	57798	4.34	80936
4.345	76933	4.345	55802	4.345	82438
4.35	75245	4.35	55126	4.35	82579
4.355	73864	4.355	56778	4.355	83392
4.36	74063	4.36	56756	4.36	83361
4.365	76131	4.365	56410	4.365	81892
4.37	77671	4.37	56590	4.37	80983
4.375	78040	4.375	56865	4.375	80555
4.38	77169	4.38	55839	4.38	78703
4.385	76412	4.385	53886	4.385	77638
4.39	75585	4.39	52667	4.39	78789
4.395	74212	4.395	52809	4.395	80894
4.4	73461	4.4	52630	4.4	81309
4.405	71860	4.405	51248	4.405	79021
4.41	69850	4.41	50538	4.41	77907
4.415	68745	4.415	50919	4.415	79639
4.42	68464	4.42	51971	4.42	78980
4.425	68708	4.425	53445	4.425	77992
4.43	68086	4.43	52290	4.43	76789
4.435	67666	4.435	50840	4.435	76305
4.44	67508	4.44	51711	4.44	75333
4.445	66619	4.445	52179	4.445	75005
4.45	65262	4.45	51156	4.45	74798
4.455	64994	4.455	50246	4.455	75532
4.46	66442	4.46	50682	4.46	74806
4.465	67755	4.465	51134	4.465	73907
4.47	68334	4.47	51885	4.47	74042
4.475	68017	4.475	52998	4.475	73255
4.48	68038	4.48	53304	4.48	74069
4.485	68418	4.485	53354	4.485	75461
4.49	67624	4.49	54184	4.49	76090
4.495	67666	4.495	54535	4.495	77934
4.5	68744	4.5	54342	4.5	79026
4.505	69318	4.505	54228	4.505	79802
4.51	68440	4.51	54601	4.51	80890
4.515	70010	4.515	54422	4.515	81340
4.52	72187	4.52	53438	4.52	80924
4.525	71852	4.525	53812	4.525	79948
4.53	70668	4.53	53524	4.53	80852
4.535	71375	4.535	55039	4.535	80883
4.54	72870	4.54	54551	4.54	80325
4.545	72515	4.545	54721	4.545	81016
4.55	71799	4.55	55535	4.55	83374
4.555	72511	4.555	56039	4.555	83240
4.56	73184	4.56	55271	4.56	82133
4.565	72969	4.565	54500	4.565	83217
4.57	73701	4.57	54296	4.57	84262
4.575	74619	4.575	56251	4.575	83480
4.58	74143	4.58	59338	4.58	81793
4.585	73241	4.585	60844	4.585	82477
4.59	73327	4.59	62044	4.59	85501
4.595	74918	4.595	62933	4.595	87800
4.6	76329	4.6	63472	4.6	88997
4.605	78216	4.605	63344	4.605	88860
4.61	78990	4.61	63661	4.61	89452
4.615	78592	4.615	64763	4.615	91641
4.62	79190	4.62	66203	4.62	93202
4.625	80594	4.625	68711	4.625	93857
4.63	81667	4.63	69765	4.63	95236
4.635	82154	4.635	69951	4.635	96726
4.64	82533	4.64	72130	4.64	98638
4.645	83140	4.645	74117	4.645	98971
4.65	82308	4.65	73847	4.65	99041
4.655	84986	4.655	74116	4.655	100445
4.66	88254	4.66	73834	4.66	102688
4.665	90303	4.665	73100	4.665	104848
4.67	90895	4.67	73804	4.67	106357
4.675	88931	4.675	73746	4.675	105980
4.68	89018	4.68	74587	4.68	105126
4.685	88049	4.685	75103	4.685	104127
4.69	87568	4.69	74708	4.69	105006
4.695	87310	4.695	74440	4.695	106512
4.7	85197	4.7	74937	4.7	106142
4.705	84975	4.705	74498	4.705	103844
4.71	84201	4.71	74863	4.71	103597
4.715	83039	4.715	73154	4.715	105746
4.72	83637	4.72	71304	4.72	104892
4.725	85221	4.725	70585	4.725	102294
4.73	85564	4.73	69690	4.73	100418
4.735	86610	4.735	66931	4.735	99764
4.74	84794	4.74	65955	4.74	99660
4.745	82981	4.745	67749	4.745	99650
4.75	81526	4.75	70335	4.75	99367
4.755	81193	4.755	71732	4.755	99799
4.76	82569	4.76	72999	4.76	100682
4.765	83788	4.765	72325	4.765	103161
4.77	84554	4.77	71698	4.77	102390
4.775	85031	4.775	72186	4.775	99413
4.78	84095	4.78	72209	4.78	99286
4.785	83724	4.785	71434	4.785	101036
4.79	84702	4.79	71363	4.79	102268
4.795	84737	4.795	72274	4.795	102377
4.8	85420	4.8	72414	4.8	102366
4.805	85122	4.805	72353	4.805	102050
4.81	86012	4.81	70976	4.81	101207
4.815	85767	4.815	71159	4.815	102249
4.82	85211	4.82	72005	4.82	103621
4.825	85633	4.825	71215	4.825	102067
4.83	85619	4.83	71281	4.83	100800
4.835	84535	4.835	72452	4.835	100314
4.84	82801	4.84	73108	4.84	100982
4.845	81023	4.845	72349	4.845	102449
4.85	78968	4.85	71136	4.85	101104
4.855	78675	4.855	69420	4.855	98516
4.86	78173	4.86	67722	4.86	99106
4.865	78611	4.865	66260	4.865	99315
4.87	77805	4.87	67317	4.87	99051
4.875	77102	4.875	65865	4.875	99157
4.88	76864	4.88	63377	4.88	99142
4.885	75153	4.885	62755	4.885	97266
4.89	73729	4.89	62315	4.89	94615
4.895	74189	4.895	59981	4.895	93686
4.9	74101	4.9	57867	4.9	92062
4.905	72620	4.905	56080	4.905	89780
4.91	71890	4.91	55906	4.91	87054
4.915	72672	4.915	56860	4.915	85163
4.92	73551	4.92	56030	4.92	86066
4.925	73800	4.925	54298	4.925	88140
4.93	71405	4.93	53680	4.93	88028
4.935	68390	4.935	53435	4.935	86666
4.94	67720	4.94	51946	4.94	85043
4.945	68060	4.945	50951	4.945	83947
4.95	67967	4.95	52602	4.95	84641
4.955	67895	4.955	53019	4.955	85003
4.96	67645	4.96	51272	4.96	84750
4.965	66386	4.965	50329	4.965	84286
4.97	65105	4.97	49585	4.97	82826
4.975	64110	4.975	48586	4.975	80063
4.98	63973	4.98	48898	4.98	78432
4.985	65831	4.985	49495	4.985	77947
4.99	66645	4.99	48927	4.99	78714
4.995	65528	4.995	47184	4.995	79201
5	64441	5	48055	5	79788
5.005	62668	5.005	49326	5.005	79245
5.01	60161	5.01	49713	5.01	79074
5.015	61693	5.015	49637	5.015	79533
5.02	64327	5.02	48783	5.02	77513
5.025	63886	5.025	46833	5.025	75364
5.03	62309	5.03	45156	5.03	74066
5.035	62148	5.035	44662	5.035	74513
5.04	62485	5.04	44041	5.04	75278
5.045	61770	5.045	42744	5.045	74272
5.05	60702	5.05	42436	5.05	73282
5.055	59713	5.055	43514	5.055	71577
5.06	59848	5.06	43870	5.06	71196
5.065	60818	5.065	44233	5.065	72892
5.07	61118	5.07	45210	5.07	73289
5.075	62201	5.075	47053	5.075	72027
5.08	64176	5.08	48088	5.08	72758
5.085	66244	5.085	48719	5.085	75399
5.09	66467	5.09	49602	5.09	78134
5.095	67138	5.095	51191	5.095	79990
5.1	68942	5.1	52639	5.1	80668
5.105	70070	5.105	52841	5.105	83088
5.11	70358	5.11	53100	5.11	84862
5.115	72918	5.115	55871	5.115	86753
5.12	77186	5.12	59206	5.12	89768
5.125	80363	5.125	60261	5.125	92466
5.13	81691	5.13	60771	5.13	94546
5.135	83261	5.135	62295	5.135	96617
5.14	85741	5.14	64131	5.14	98035
5.145	87408	5.145	66220	5.145	100144
5.15	87928	5.15	68503	5.15	103045
5.155	88793	5.155	70749	5.155	103029
5.16	89840	5.16	71715	5.16	102417
5.165	91929	5.165	70708	5.165	103534
5.17	94332	5.17	72439	5.17	105924
5.175	95129	5.175	74986	5.175	107684
5.18	95378	5.18	75428	5.18	109723
5.185	95843	5.185	74660	5.185	112138
5.19	95060	5.19	73496	5.19	113448
5.195	93797	5.195	77054	5.195	113202
5.2	94862	5.2	80930	5.2	116396
5.205	95238	5.205	82775	5.205	118892
5.21	95150	5.21	82920	5.21	119182
[truncated: 2,557 more rows]
