# Supplementary material for: Molecular insights into a distinct class of terpenoid cyclases
Source: Research Square preprint supplement (doi:10.21203/rs.3.rs-4382230/v1), 2024-12-23
Supplement: Supplementary file 2 [file 7e3a6ed9da3ae055e80c6b98.docx]

| **Author Checklist** | NCOMMS-24-36045A |
| --- | --- |
|  | ______________________________ |
| **Please check the items below carefully and add a response in each row of the table to indicate the changes that you have made.** | |
|  |  |
| **Remaining reviewer comments** |  |
| Our guidance: | Your response: |
| Please address the remaining concerns/ suggestions of referee #2. | All the Reviewer #2’s concerns have been addressed. Please refer to the point-by-point response. Modifications have been highlighted in the marked version of the manuscript. |
|  |  |
| **Title and Abstract** |  |
| Our guidance: | Your response: |
| We would like to propose a revised title to comply with our formatting requirements and improve the accessibility of your work:  **Molecular insights into a distinct class of terpenoid cyclase**  Please edit the title in your manuscript files accordingly. Note that further minor changes may be made during the production process, and you will be able to check these in the proofs. **Alternatively, please suggest another title in your response here. Please ensure that it does not exceed 15 words and does not contain punctuation or the words ‘novel’/ ‘new’/‘unique’.** | We accept the suggested title. |
| We would like to propose a revised abstract to comply with our formatting requirements:  Terpenoid cyclases (TCs) account for the synthesis of the most widespread and diverse natural compounds. A sesquiterpene cyclase termed BcABA3 from an abscisic acid-producing fungus *Botrytis cinerea* that yields (2Z,4E)-α-ionylideneethane but lacks signature feature of canonical TCs represents a **distinct** type of TCs. Here, **we report** the crystal structures of BcABA3, a closely related RuABA3 from *Rutstroemia* sp. and a bacterial SkABA3 from *Shimazuella kribbensis*. These ABA3 proteins adopt an all-α-helix fold and bind pyrophosphate moiety of farnesyl pyrophosphate by Glu-chelated Mg2+ ion cluster. **We conduct** mutagenesis experiments to validate the role of the substrate-binding residues. **~~Noteworthy,~~** SkABA3 appears to yield compounds that are distinct from (2Z,4E)-α-ionylideneethane. These results not only provide the molecular insight into ABA3 proteins that serve as an important basis to the future investigation of this **~~new~~** class of TCs, but also reveal the existence of more uncharacterized terpenoids synthesized via **~~unprecedented~~** **dedicated** machineries.  Please edit the abstract in your manuscript files accordingly. Note that further minor changes may be made during the production process, and you will be able to check these in the proofs. | The abstract has been modified as suggested. |
|  |  |
| **Author information** |  |
| Our guidance: | Your response: |
| We ask that you consult with your coauthors to ensure that all names, affiliations, and titles are represented correctly. Note that if any authors are added or removed after this point then all authors will be requested to provide approval documentation that could potentially delay the production of your paper. | Confirmed. |
| Please ensure only one department or institution is listed in a single affiliation. | Confirmed. |
| Ensure affiliations are appropriately labeled and featured sequentially and in ascending order (1,2,3,... or a,b,c...). Please ensure all corresponding authors are marked with a specific symbol and include their emails. Similarly, if you have “equally contributing” or “joint supervision” authors, use a specific symbol to mark them and not a number. | Confirmed. |
| Please ensure the author contributions section mentions each author's initials at least once with their contributions to the work. Authors with the same initials must be differentiated in the statement. | Confirmed. |
|  |  |
| **Article structure** |  |
| Our guidance: | Your response: |
| We can accommodate up to 10 display items (Figures or Tables) in the main article. Each Figure and Table must fit easily within an A4 page (210 x 297 mm). Please ensure that the number and size of your Figures and Tables fulfil these requirements to avoid any delay in the acceptance of your article. | Confirmed. |
| Ensure main Figures are uploaded as separate individual files. Each figure file must contain all intended panels labelled and displayed as intended and fit entirely on a single page. Do NOT include legends within the figure files, as these must be in the main manuscript.  Please provide main figures as individual vector files with editable text. Acceptable file types for figures are .ai, .eps, .pdf, .ppt or Chem Draw for fully editable vector-based art. For detailed guidance on figure preparation, see <https://www.nature.com/documents/aj-artworkguidelines.pdf>  Please provide figures without embedded legends or borders. Legends should be provided at the end of the main manuscript text only. The figure files should only contain the parts of the figure that should be reproduced in the final paper. Please do not include headings/ labels such as ‘Figure 1’ that should not appear in the HTML/PDF version.  Supplementary Figures must be all contained in the Supplementary Information PDF and do NOT need to be uploaded separately. | All figures have been uploaded separately as ppt files with editable text. |
| **Please ensure your main manuscript file includes the following sections, in this order:** |  |
| *Title Author list Affiliations Abstract Introduction Results Discussion (optional) Results and Discussion (optional) Methods Data Availability Code Availability (if relevant) References Acknowledgements Author Contributions Statement Competing Interests Statement Tables Figure Legends/Captions (for main text figures)* | The manuscript has been restructured as requested. |
| We do not edit Supplementary Information files; they will be uploaded with the published article as they are submitted with the final version of your manuscript. Any tracked changes should be removed from the file and the file should be provided as a PDF file. Supplementary Figures do not need to be provided separately.  Please supply the main Supplementary Information file as a single PDF file, without text change tracking or line numbering (please also see the relevant section further down).  Please note, allowed Supplementary items included in the Supplementary Information file comprise: Supplementary Figures, Supplementary Tables, Supplementary Methods, Supplementary Notes, Supplementary Discussion and Supplementary References  In both the main text and the Supplementary Information file, please refer to Supplementary Figures, Supplementary Tables and Supplementary References as such (Please note, the correct formats are: Supplementary Fig. 1, Supplementary Table 1, Supplementary Equation (1), while the incorrect formats include: Supplementary Fig. S1, Fig. S1, Supplemental Table 1, See Supplementary Information.) | Confirmed. |
| Please supply Source Data file for all data presented in graphs within the Figures. Please use either xlsx or ZIP format, and do not upload the file sin the RAR format. | The Source Data file containing all raw data has been uploaded. |
| Please ensure that uncropped scans of all blots and gels in Figures are supplied in the Source Data file. Those presented in Supplementary Figures should be supplied at the end of the Supplementary Information file. | The uncropped scans of SDS-PAGE of Supplementary Fig. 2 have been included in the Source Data file. |
| Within the Source Data file, the relevant raw data from each figure or table (in the main manuscript and in the Supplementary Information) should be represented by a single sheet in an Excel document, or a single .txt file or other file type in a zipped folder. An example of the Source Data file is available demonstrating the correct format:  https://www.nature.com/documents/ncomms-example-source-data.xlsx  The file should be labelled 'Source Data', with the title and a brief description included in your response here, and should be mentioned in all relevant figure legends using the template text below:  'Source data are provided as a Source Data file.'  A reference to the source data file should be added in the 'Data Availability' section, using the text “Source data are provided with this paper. | The source data and related information have been provided. The source data underlying Fig. 4a, 4b, Supplementary Figs. 2, 3a, 3b, 8a, and 10a are provided as Source Data file. |
|  |  |
| **Main text** |  |
| Our guidance: | Your response: |
| Please refrain from using words such as **new/novel/first/unique**, when referring to the scientific findings. Please also remove exaggerated language such as 'extremely'/'outstanding' | These terms have been removed as possible. |
| The final paragraph of the Introduction must begin with a phrase like “In this work” or “Here, we show”, and contain a brief summary of the major results and conclusions of the current work, written in the present tense. | The final paragraph of the Introduction has been modified as requested. |
| Please ensure that gene and protein names are formatted according to community standards for the organism in question. Italicize gene symbols and functionally defined locus symbols; do not use italics for proteins. | Confirmed. |
| Please do not use italics, bold font, underlining or speech marks/quotation marks except in headings unless required for technical terms (in both the main text and the display items). | Corrected as requested. |
| Please make sure that mathematical terms throughout your manuscript and Supplementary Information (including in figures, figure axes, and legends) conform strictly to the following guidelines. Equations must be supplied in editable format, and not as images. Scalar variables (e.g. x, V, χ) must be typeset in italic, whereas multi-letter variables and functions (e.g. log) must be formatted in roman. Vectors (such as the wavevector k or the magnetic field vector B) must be typeset in bold without italics. | Conformed. |
| Please label equations sequentially as (1), (2), (3), etc. | The equation displayed in “Enzyme activity measurement by PPi release assay” has been termed as equation (1). |
| Please use bold font for numbering chemical compounds, but not for chemical abbreviations or formulae in both the main text and the display items. | Confirmed. |
| Please use italics for species names, both in the main text and the display items. | Confirmed. |
|  |  |
| **Figures and Tables** |  |
| Our guidance: | Your response: |
| Please see the guidelines linked below for detailed instructions about how your figures should be prepared. Following these instructions will reduce the chances of delays should we need to request replacement artwork from you at a later stage. | Confirmed. |
| <https://www.nature.com/documents/NRJs-guide-to-preparing-final-artwork.pdf> |  |
| Red/green color contrasts can confuse our colorblind readers; please consider recoloring such figures, if possible. | Confirmed. |
| Shadings or symbols in graphs must be defined in some fashion. We prefer that you use a key within the image; do not include colored symbols in the legend/caption. | Confirmed. |
| Any abbreviations, symbols or colours present in your figures must be defined in the associated legends. | Confirmed. |
| Chemical structures in figures should be drawn using the Nature Chemistry template or its settings: http://www.nature.com/authors/guides/NR_chemdraw_stylesheet.cds Refer to the Nature Research Chemical Structures Guide for all details: https://www.nature.com/authors/guides/ChemStructureGuide.pdf | Confirmed. |
|  |  |
| **Data and Code** |  |
| Our guidance: | Your response: |
| Nature journals strongly support public availability of data and code. Please deposit the data and code used in your paper into a public data repository, or alternatively, present the data as Supplementary Information. If data can only be shared on request, please explain why in your Data Availability Statement, and also in the correspondence with your editor.   Please note that for some data types, deposition in a public repository is mandatory. Any restrictions on sharing of these data types must be clearly indicated in the statement and discussed with the editor. More information on our data deposition policies and available repositories can be found here: | Confirmed. |
| <https://www.nature.com/nature-research/editorial-policies/reporting-standards#availability-of-data> |  |
| All published manuscripts reporting original research in Nature Portfolio journals must include a data availability statement, within the Methods and under the heading 'Data Availability'.   The data availability statement must make the conditions of access to the “minimum dataset” that are necessary to interpret, verify and extend the research in the article, transparent to readers. We ask that you don’t use phrases like ‘available on reasonable request’ but instead specify any restrictions to accessing your data as described below.  This minimum dataset may be provided through deposition in public community/discipline-specific repositories, custom proprietary repositories or general repositories like Figshare, Zenodo and Dryad. Providing large datasets in supplementary information is strongly discouraged and the preferred approach is to make data available in repositories. Please see https://www.springernature.com/gp/authors/research-data-policy/recommended-repositories for a list of recommended repositories.  If DOIs are provided, we also strongly encourage including these in the Reference list (authors, title, publisher (repository name), identifier, year).  The Data Availability Statement should also reference any source data published alongside the paper.  For clinical datasets or third party data, please ensure that the Data Availability statement adheres to our policy (https://www.nature.com/nature-research/editorial-policies/reporting-standards#availability-of-data)  If data are unavailable, please indicate the exact reasons why data cannot be made available in a suitable public repository or upon request, including any conditions related to ethical approval, consent from study subjects, commercial or legal restrictions, etc.  For data that are available under restricted access, the Data Availability statement must specify - the reasons for access restrictions - what the restrictions are  - how one can get access to the data - who to contact to request access - any restrictions on who the data can be made available to or for which purpose - the expected timeframe for response to access requests - for how long the data will be available once access has been granted. | Crystal structures of biomolecules reported in the manuscript and Source Data underlying all gels and plots are accessible. This is referenced in Data Availability Statement in the main text and the Reporting Summary. |
| Please use the following template to provide all the information stated above:  The XX data generated in this study have been deposited in the YY database under accession code ZZ [add hyperlink here]. The XX data are available under restricted access for {insert reason}, access can be obtained by {explain how}. The raw XX data are protected and are not available due to data privacy laws. The processed XX data are available at YY. The XX data generated in this study are provided in the Supplementary Information/Source Data file. The XX data used in this study are available in the YY database under accession code ZZ [Add hyperlink here]. | Confirmed. |
| Since your manuscript contains new crystal structures of biomolecules, please include - An image of a portion of the electron density map (including contour level and type of map) for each crystal structure. - An omit map (including contour level) for all ligand-bound crystal structures - A table summarizing structural and refinement statistics (see https://www.nature.com/documents/nr-tables-xray.doc for a template). This should be shown in one or multiple Supplementary Figures/Tables. | Supplementary Fig. 7 shows the 2*F*o-*F*c maps of Zn2+ ion-binding motif in three structures. Supplementary Fig. 11 shows the omit maps of all bound ligands in two complex structures. Supplementary Table 4 summarizes the refinement statistics. |
|  |  |
| **Methods** |  |
| Our guidance: | Your response: |
| GENERAL REQUIREMENTS: Please provide a full description of the mass spectrometry experiments. This should include – the total number of samples analyzed, numbers and types of controls, number of technical and/or biological replicates (even if n=1) – the sample preparation protocol – LC/GC parameters, MS acquisition settings, type and vendor of LC/GC/MS instruments – a description of the data annotation/validation/analysis procedure – all software tools (including version number and relevant settings) and statistical tests that have been used and citations of the corresponding references | The request information has been included in the “Reaction product analysis by gas chromatography-mass spectrometer” in Methods section. |
| Sufficient details of the experiments must be provided in the Methods section such that they could be reproduced without reference to published papers. Use of the term "as described previously" is not encouraged. | The related descriptions in the PPi release assay are included to support that the previous literatures also adopt the same approach to evaluate the terpene synthase activity. Detailed experimental procedures are also included in the referred section. |
| Sequences of oligonucleotides (e.g. primers, RNAi, Crispr), or company names and catalog numbers if reagents are commercial, should be provided in the Methods. If this information is lengthy, it may be provided as a separate Supplementary Table, cited in the Methods. | Confirmed. |
| Please rename the Methods section as 'Methods'. | Corrected as requested. |
| All accession codes must be accompanied with their hyperlinks throughout. Please provide the links in square brackets, right after the code (i.e., please do not use the hyperlink function in Word) and, if the manuscript reports multiple structures, followed by the indication of which structure does the code refer to. Please use the following formats to ensure that the links are permanent:  CODE [hyperlink] (description if necessary) Use full DOI hyperlinks [http://doi.org/xxxxx] whenever possible.  Example for the PDB entries:  6YNV [http://doi.org/10.2210/pdb6YNV/pdb] (Fo-wing structure),  Example for Zenodo entries:  Zenodo entry 4514864 [https://doi.org/10.5281/zenodo.4514864] (Digital Object Identifier (DOI) pdf) | The hyperlinks for all PDB entries included in the main text and SI have been provided. |
|  |  |
| **References** |  |
| Our guidance: | Your response: |
| Supplementary References should appear at the end of the Supplementary Information file, and must be self-contained and numbered from 1. References mentioned in both the main text and the Supplementary Information should be part of both reference lists so that the Supplementary Information does not refer to the reference list in the main paper and vice versa. | Confirmed. |
|  |  |
| **End matter** |  |
| Our guidance: | Your response: |
| Nature Portfolio defines Competing Interest (CI) as financial and non-financial interests (including but not limited to funding, employment, stocks, shares, patents, personal or professional relationships with individuals or institutions, and unpaid membership advocacy) that could be perceived to directly undermine the objectivity, integrity, and value of a publication, or could be seen as having an influence on the judgments and actions of authors with regard to objective data presentation, analysis, and interpretation.  Please thoroughly review our policy on Competing Interests and include a detailed statement both in your final manuscript file and in our manuscript tracking system. Please ensure the statements are identical in both. Be specific about how each point stated relates to the research and list applicable author initials, and/or patent numbers.  If there are no competing interests, a negative statement must be included. | All authors declare no competing interests. This has been included as the Competing Interests Statements in the main text. |
| <https://www.nature.com/nature-research/editorial-policies/competing-interests> |  |
| Please confirm that all relevant funding awarded to each author is described in the Acknowledgements section. List each grant number, followed by the initials of the author who received it. | The requested information has been provided in the Acknowledgements. |
|  |  |
| **Additional Revisions** |  |
| Our Guidance: | Your Response: |
| For any Supplementary Figures, please check and confirm that:  * If data is presented as bar charts, individual data points are shown using overlaid dot plots.  * The n number (i.e. the sample size used to derive statistics) is provided and defined as a precise value (not a range), using the wording “n=X samples/cells/independent experiments” etc. where applicable.  * Any chart axis, error bars, scale bars, molecular weight markers, symbols and colour scales are defined.  * Any statistical tests used for data analysis are specified and exact p-values are provided either on the figures themselves, in the legend or in the Source Data file.  * Wherever representative data such as blots or micrographs are shown, the legend indicates how many times the experiment was repeated with similar results.  * Full uncropped scans of any cropped gel/blot images are provided as an additional Supplementary Figure or in the Source Data file. | Confirmed. |
|  |  |
| **Preparing your manuscript files** |  |
| Our guidance: | Your response: |
| Unless otherwise stated please limit individual file sizes to approximately 30MB. We strongly encourage the use of repositories for large datasets or source data due to size considerations. | Confirmed. |
| Please supply a brief (maximum 250 characters, including spaces) summary of the main findings of the paper to be used on our website and in our e-alerts. The summary should be written in the third person in language suitable for a broad audience. It should follow the structure: "[[Brief background first sentence]]. Here, authors [[brief description of accomplishment]]." The summary may be edited by the editors prior to publication. Please provide this summary in your response here. | BcABA3 catalyzes FPP cyclization but lacks features to be recognized as a terpene cyclase. Here, authors resolved the crystal structures of BcABA3 and homologues to reveal the molecular basis of this distinct type of enzyme. |
| To ensure maximum visibility for your work, we may post about your paper following publication. If you would like us to include the X (formerly Twitter) handles of the first author(s), corresponding author(s), lab or institution in this post, please provide them in your response here. We would also welcome your suggestions for hashtags to use when posting about the work. | No X handle is provided. |
| Please provide main figures as individual vector files with editable text. Acceptable file types for figures are .ai, .eps, .pdf, .ppt or Chem Draw for fully editable vector-based art. For detailed guidance on figure preparation, see https://www.nature.com/documents/aj-artworkguidelines.pdf | All main figures have been uploaded as ppt files that contain editable text. |
| Please confirm that all figures and tables that are presented in the main manuscript and supplementary information files can be reproduced with the data and code that has been deposited and shared. If not, please provide a Source Data file. To learn more about our motivation behind this policy, please see https://www.nature.com/articles/s41467-018-06012-8.   The Source Data file should, as a minimum, contain the data underlying the following types of display items in the main manuscript and the supplementary information file:  - Any reported means/averages in box plots, bar charts, and tables  - Dot plots/scatter plots, especially when there are overlapping points  - Line graphs  - Uncropped and unprocessed scans of all blots and gels. The edge of membranes and molecular weight ladders should be visible on all blots. Where membranes have been cut, please ensure that at least one marker above and below the bands of interest is present.   For an example of presentation of Source Data, including graphs, plots and full scan blots, see the Source Data file of https://www.nature.com/articles/s41467-020-16984-1#Sec35 and for more information, please refer to https://www.nature.com/nature-research/editorial-policies/image-integrity.  The Source Data should be provided in a single Excel file with data for each figure/table in a separate sheet, or in multiple labelled files within a zipped folder (please do not use RAR format).   You can see full instructions at https://www.nature.com/ncomms/submit/how-to-submit but we would recommend checking one of our recently published papers to see the correct format (e.g. https://www.nature.com/articles/s41467-019-09715-8#Sec29). Please include data in the rawest form possible. For example, for qPCR please include Ct values for test and reference genes rather than normalized expression values.   Please label the file as ‘Source Data’ and upload using the option Supplementary Dataset on our submission system. Please include a reference to your Source Data file in the Data Availability statement using the phrase “Source Data are provided with this paper”.  A Source Data file is not necessary for raw data and code that has already been shared in a public repository and all display items that are presented in the main manuscript and supplementary information files can be reproduced. | Confirmed. |
| Please note that all Supplementary Information must be provided as a single separate PDF file, not within the manuscript file.  All Supplementary Information items (e.g. Supplementary Figures, Supplementary Tables, Supplementary Methods, Supplementary Notes, Supplementary Discussion, Supplementary References) must be included in one PDF document. Please refer to our formatting guide when preparing your supplementary information file: https://www.nature.com/documents/ncomms-formatting-instructions.pdf   All Supplementary Information files (e.g. Supplementary Data, Supplementary Software, etc.) must be cited in the main text.  Every Supplementary Figure must be accompanied by a legend of up to 350 words, referring to all panels, and a brief title that summarises the whole figure.  Only Supplementary Movie, Audio, Data and Software files should be submitted separately from the Supplementary Information. | Confirmed. |
| Please supply legends for each Supplementary Movie/Audio/Data file in your response here (not in the Supplementary Information file). Please label each files as Supplementary Movie/Audio/Data 1, etc. | No related file is included in the submitted manuscript. |
| The use or adaptation of previously published images is strongly discouraged. If this is unavoidable, please request the necessary rights documentation to re-use such material from the relevant copyright holders and return this to us when you submit your revised manuscript. Please check whether your manuscript or Supplementary Information contain third-party images, such as figures from the literature, stock photos, clip art or commercial satellite and map data.  If any elements of your submitted work have been created with BioRender you will need to ensure you have obtained a publication license from BioRender, adhering to the user requirements as outlined within the license. The reference for BioRender created graphics should be present in the accompanying legend of the display material it is present in.  A copy of the publication license should be uploaded to our system as a related manuscript file upon resubmission.  For more information please see the BioRender knowledge article here: https://help.biorender.com/hc/en-gb/articles/21283116932765-CC-BY-publishing-and-reader-permissions  For more information on what constitutes ownership by a third party, please contact our Editorial Assistant at naturecommunications@nature.com | No related event in the submitted manuscript. |
|  |  |
| **Forms to complete** |  |
| Our guidance: | Your response: |
| **Editorial Policy Checklist** |  |
| Please update and upload a final version of the Editorial Policy Checklist with your revised manuscript files. A blank Editorial Policy Checklist can be found via the link below. Note that this form is a dynamic ‘smart pdf’ and must be downloaded and completed in Adobe Reader. |  |
| Please update your current checklist or download from: | The update Editorial Policy Checklist has been uploaded. |
| <https://www.nature.com/documents/nr-editorial-policy-checklist.zip> |  |
| **Reporting Summary** |  |
| Please revise the Reporting Summary according to the requests below. After making the requested changes, please be sure to include the final version of your Reporting Summary in your submission as a supplementary information file. Please note that this form is a dynamic 'smart pdf' and must therefore be downloaded and completed in Adobe Reader, instead of opening it in a web browser. | The update Reporting Summary has been uploaded. |
| Please update your current checklist or download from: |  |
| https://www.nature.com/documents/nr-reporting-summary.pdf |  |
| **Reporting Summary** |  |
| Our guidance: | Your response: |
| **Statistics** |  |
| Checkbox 1: Please mark this field as "confirmed", as the exact sample size (n) is relevant to the study. | Done. |
| **Software** |  |
| Please ensure all the data collection/data analysis software/tools/algorithms/packages used in the study are clearly mentioned in the manuscript and are also listed in the reporting summary (with version numbers). | Done. |
| **Data Availability** |  |
| Please provide a complete data availability statement in the manuscript and in the reporting summary. | Done. |
| **Field Specific Reporting** |  |
| **Life Sciences Study Design** |  |
| Please describe how sample sizes were determined (for all experiments performed in this study) and provide a rationale for how they were chosen, detailing any statistical methods used to predetermine sample size and/or including relevant citations if available. If no sample size calculation was performed, describe how sample sizes were chosen and provide a rationale for why these sample sizes are sufficient. | Done. |
| **You will need to upload:** |  |
| Editorial Policy Checklist | Check. |
| Completed Third Party Rights Table (if relevant) | Not relevant. |
| A point-by-point response to the reviewers' comments | Check. |
| A completed copy of this checklist | Check. |
| The main manuscript file in either Microsoft Word or LaTeX format | Check. |
| Separate main Figure files | Check. |
| Separate Source Data file | Check. |
| A Supplementary Information file | Check. |
| Supplementary Table, Video, Audio, Data, or Software files | Not relevant. |
|  |  |
